# Supplementary material for: Nitrogen atom insertion into arenols to access benzazepines
Source: Royal Society of Chemistry journal article supplement (doi:10.1039/d3sc05367a), 2024-01-01
Supplement: d3sc05367a1.pdf [file d3sc05367a1.pdf]

# Nitrogen atom insertion into arenols to access benazepines

Yi He<sup>a†</sup> Juanjuan Wang<sup>a†</sup> Tongtong Zhu,<sup>a</sup> Zhaojing Zheng<sup>b</sup> and Hao Wei<sup>\*a</sup>

<sup>a</sup>College of Chemistry & Materials Science, Northwest University, Xi'an 710069, China.

<sup>b</sup>College of Food Science and Technology, Northwest University, Xi'an 710069, China.

<sup>†</sup>These authors contributed equally to this work.

\*Correspondence: haow@nwu.edu.cn

## Table of contents

|                                                                                               |    |
|-----------------------------------------------------------------------------------------------|----|
| 1. General information .....                                                                  | 2  |
| 2. Experimental procedures .....                                                              | 2  |
| 2.1 General procedure of copper-catalyzed nitrogen atom insertion into arenols.....           | 2  |
| 2.2 Optimization of reaction conditions .....                                                 | 3  |
| 2.3 Synthesis of starting materials .....                                                     | 5  |
| 2.3.1 General procedure for preparation of substrate 20a, 22a-24a, 26a-33a <sup>1</sup> ..... | 5  |
| 2.3.2 General procedure for preparation of substrate 5a-17a <sup>1</sup> .....                | 6  |
| 2.3.3 General procedure for Preparation of substrate 34a-42a, 45a-47a <sup>2</sup> .....      | 7  |
| 2.4 Procedure for derivatization of products .....                                            | 8  |
| 3. Mechanism studies .....                                                                    | 8  |
| 3.1 Radical inhibition experiment.....                                                        | 8  |
| 3.2 Cyclic Voltammetry.....                                                                   | 9  |
| 3.3 Mechanistic studies for carbon atom deletion .....                                        | 10 |
| 4. X-Ray crystallographic data .....                                                          | 14 |
| 5. NMR spectra data of compounds .....                                                        | 17 |
| 6. References.....                                                                            | 59 |
| 7. Spectra of Compounds.....                                                                  | 60 |

## 1. General information

Commercially available reagents were used without further purification. Solvents were treated prior to use according to the standard methods. All reactions were carried out under an atmosphere of nitrogen using standard schlenk techniques unless otherwise noted. Glass wares were heat-dried and cooled down under vacuum prior to use. Column chromatography was carried out on silica gel (300–400 mesh) using a forced flow of eluent at 0.3–0.5 bar pressure. Flash column chromatography was carried out using silica gel (200–300 mesh) at increased pressure.  $^1\text{H}$  NMR,  $^{13}\text{C}$  NMR spectra were recorded on a WNMN-I spectrometer (400 MHz  $^1\text{H}$ , 100 MHz  $^{13}\text{C}$ ). The spectra were recorded in  $\text{CDCl}_3$  as the solvent at room temperature.  $^1\text{H}$  and  $^{13}\text{C}$  chemical shifts are reported in ppm relative to either the residual solvent peak ( $^{13}\text{C}$ ) or TMS ( $^1\text{H}$ ) as an internal standard. HRMS were performed on Bruker Daltonics MicroTof-Q II mass spectrometer. Cyclic Voltammetry studies were performed using a Shanghai Chenhua CHI760E workstation.

### *Caution!*

The azide and peroxide compounds involved in the experiments are potentially dangerous, and all compounds must be synthesized on a small scale. The operation must be carried out in the cover behind the blast shield. Always wear protective goggles and leather gloves.

## 2. Experimental procedures

### 2.1 General procedure of copper-catalyzed nitrogen atom insertion into arenols

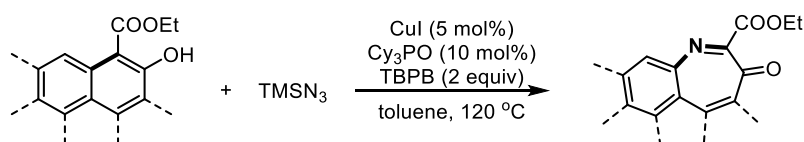

In a sealed 10 mL vial equipped with a magnetic stir bar was charged with the arenols (0.1 mmol), CuI (1.0 mg, 0.005 mmol, 5 mol%), Cy<sub>3</sub>PO (3.0 mg, 0.01 mmol, 10

mol%), TBPB (38.0  $\mu$ L, 0.2 mmol, 2.0 equiv), and TMSN<sub>3</sub> (39.0  $\mu$ L, 0.3 mmol, 3.0 equiv) in toluene (1.0 mL) was premixed and added before the vial was briefly flushed with nitrogen. Subsequently the vial was capped and closed tightly. Then the reaction was stirred at 120 °C for 12 h. After the reaction was completed, the organic phase was washed with saturated sodium bicarbonate solution for three times, dried over MgSO<sub>4</sub>, concentrated, and purified by flash chromatography to afford desired products.

## 2.2 Optimization of reaction conditions

**Table S1.** Screening for catalysts<sup>a</sup>

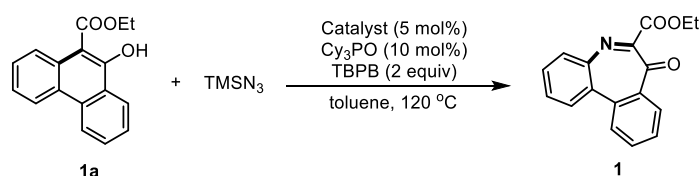

| Entry    | Catalyst                                                              | Yield <sup>b</sup> |
|----------|-----------------------------------------------------------------------|--------------------|
| <b>1</b> | <b>CuI</b>                                                            | <b>80%</b>         |
| 2        | CuCl                                                                  | 72%                |
| 3        | CuBr                                                                  | 65%                |
| 4        | Cu(OAc) <sub>2</sub>                                                  | 60%                |
| 5        | CuCN                                                                  | 61%                |
| 6        | Cu <sub>2</sub> O                                                     | 62%                |
| 7        | Cu <sub>2</sub> (OH) <sub>2</sub> CO <sub>3</sub>                     | 21%                |
| 8        | Cu(CF <sub>3</sub> SO <sub>3</sub> )(CH <sub>3</sub> CN) <sub>4</sub> | 67%                |
| 9        | Ni(acac) <sub>2</sub>                                                 | n.r                |
| 10       | Pd(PPh <sub>3</sub> ) <sub>4</sub>                                    | n.r                |
| 11       | Ru(bpy) <sub>3</sub> Cl <sub>2</sub>                                  | n.r                |

<sup>a</sup>Unless otherwise specified, all reactions were carried out using 1a (0.1 mmol) and TMSN<sub>3</sub> (0.3 mmol), with catalyst (5 mol%), Cy<sub>3</sub>PO (10 mol%) and TBPB (2.0 equiv) in toluene at 120 °C for 12 h. <sup>b</sup>Isolated yields after chromatography.

**Table S2.** Screening for ligands<sup>a</sup>

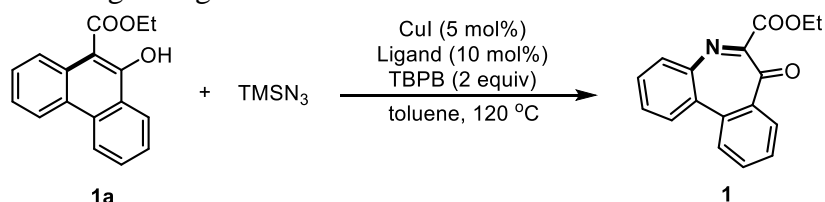

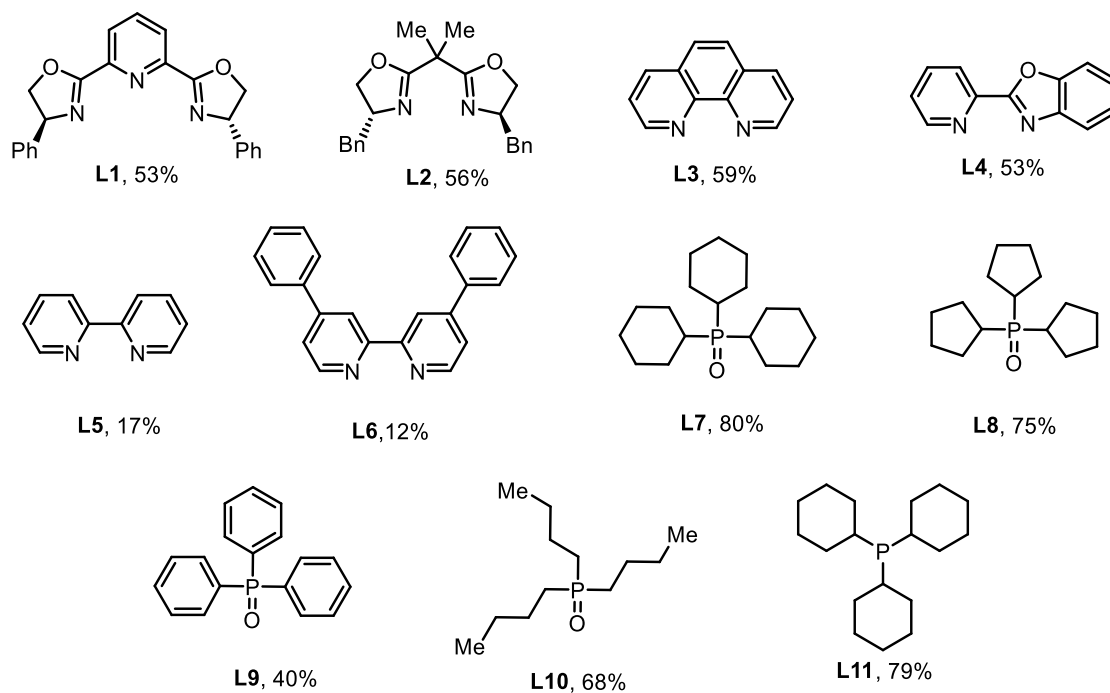

Ligand PCy<sub>3</sub> can afford desired product in 79% yield. However, PCy<sub>3</sub> was oxidized to the Cy<sub>3</sub>PO under these condition.

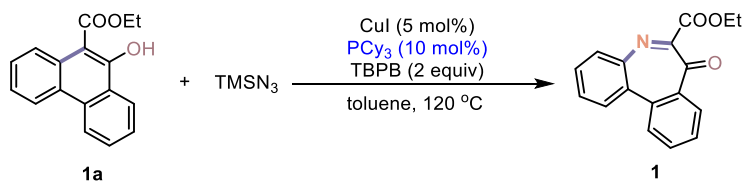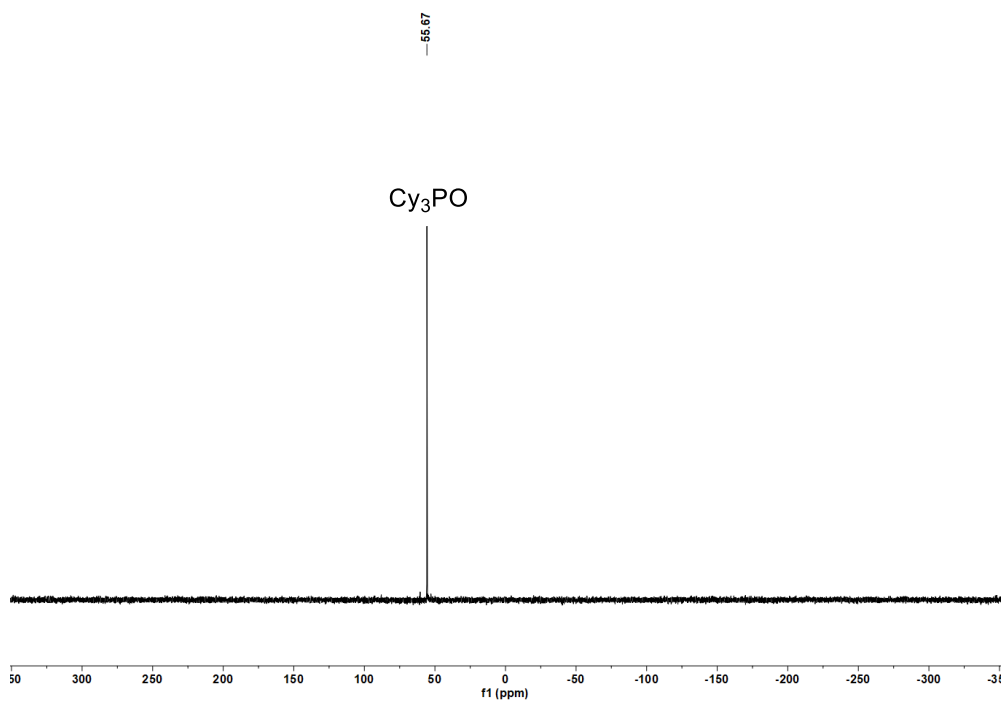

**Figure S1.** <sup>31</sup>P-NMR of the reaction mixture after the reaction.



**Table S3.** Screening for solvents<sup>a</sup>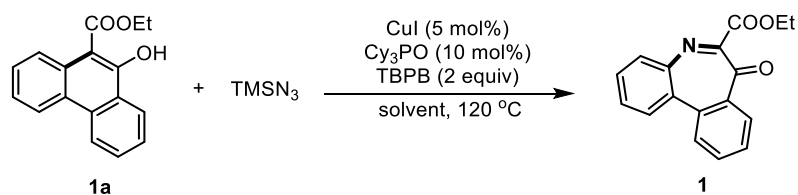

| Entry    | Solvent        | Yield <sup>b</sup> |
|----------|----------------|--------------------|
| <b>1</b> | <b>toluene</b> | <b>80%</b>         |
| 2        | DCE            | 50%                |
| 3        | PhCl           | 72%                |
| 4        | DME            | 30%                |
| 5        | DMF            | n.r                |
| 6        | DMSO           | n.r                |
| 7        | 1,4-dioxane    | n.r                |
| 8        | MeCN           | n.r                |

<sup>a</sup>Unless otherwise specified, all reactions were carried out using **1a** (0.1 mmol) and  $\text{TMSN}_3$  (0.3 mmol), with  $\text{CuI}$  (5 mol%),  $\text{Cy}_3\text{PO}$  (10 mol%) and  $\text{TBPB}$  (2.0 equiv) in solvent at  $120\text{ }^\circ\text{C}$  for 12 h.

<sup>b</sup>Isolated yields after chromatography.

**Table S4.** Screening for temperatures<sup>a</sup>.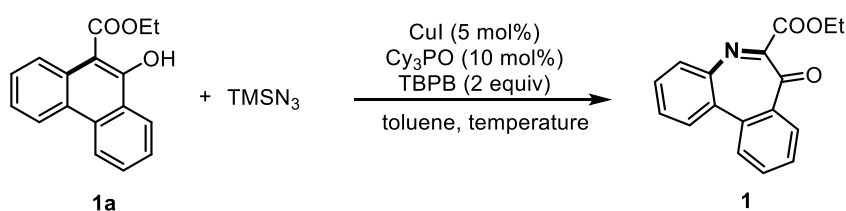

| Entry    | Temperature( $^\circ\text{C}$ ) | Yield <sup>b</sup> |
|----------|---------------------------------|--------------------|
| 1        | 90                              | 6%                 |
| 2        | 100                             | 11%                |
| 3        | 110                             | 54%                |
| <b>4</b> | <b>120</b>                      | <b>80%</b>         |
| 5        | 130                             | 63%                |
| 6        | 140                             | 39%                |

<sup>a</sup>Unless otherwise specified, all reactions were carried out using **1a** (0.1 mmol) and  $\text{TMSN}_3$  (0.3 mmol), with  $\text{CuI}$  (5 mol%),  $\text{Cy}_3\text{PO}$  (10 mol%) and  $\text{TBPB}$  (2.0 equiv) in toluene at temperature for 12 h. <sup>b</sup>Isolated yields after chromatography.

## 2.3 Synthesis of starting materials

### 2.3.1 General procedure for preparation of substrate **20a**, **22a-24a**, **26a-33a**<sup>1</sup>

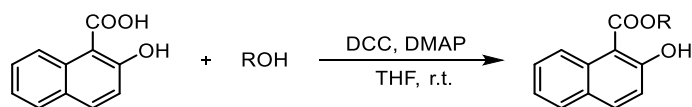

**Step 1:** To a stirred solution of 2-hydroxy-1-naphthoic acid (10.0 mmol, 1.0 equiv), alcohol derivatives (10.0 mmol, 1.0 equiv) and DMAP (0.1 mmol, 0.1 equiv) in THF (15 mL), a solution of DCC (15 mmol, 1.5 equiv) in THF (15 mL) was added dropwise. The reaction mixture was stirred at room temperature for 4 h. Then the mixture was filtered through a pad of celite and the solvent was removed in vacuum. The residue was purified by silica gel column chromatography to afford the desired products.

### 2.3.2 General procedure for preparation of substrate 5a-17a<sup>1</sup>

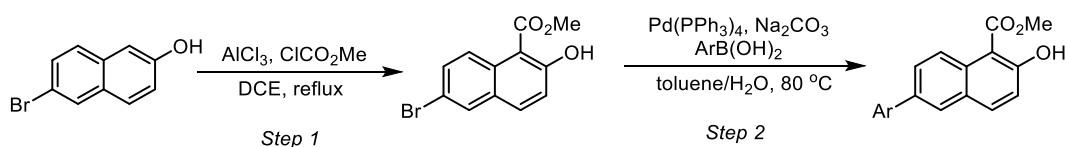

**Step 1:** To a 50 mL three-neck round-bottomed flask equipped with a condenser,  $\text{AlCl}_3$  (5.0 mmol, 1.0 equiv) and DCE (10 mL) were added successively. Then methyl chloroformate (12.5 mmol, 2.5 equiv) was added and the mixture was stirred for 10 min at room temperature. 7-methyl-2-naphthol (5.0 mmol, 1.0 equiv) was added and the mixture was stirred under reflux for 10 h. Then ice water was added. Then the mixture was filtered through a pad of celite. The aqueous layer was extracted with DCM for three times. The organic layer was washed with brine, dried over  $\text{MgSO}_4$ , filtered and then concentrated. The residue was purified by silica gel column chromatography to afford desired products.

**Step 2:** To a 100 mL schlenk flask, methyl-6-bromo-2-hydroxy-1-naphthoate (2.0 mmol, 1.0 equiv), aryl boronic acid (2.4 mmol, 1.2 equiv),  $\text{Pd}(\text{PPh}_3)_4$  (0.2 mmol, 0.1 equiv),  $\text{Na}_2\text{CO}_3$  (4.0 mmol, 2.0 equiv), toluene (5.0 mL) and  $\text{H}_2\text{O}$  (5.0 mL) were added successively. The mixture was reacted at 80 °C under nitrogen

atmosphere for 12 h. The reaction mixture was allowed to cool down to room temperature, filtered through a pad of celite and the solution was extracted with DCM. The organic layer was dried over  $\text{MgSO}_4$ , concentrated, and purified by flash chromatography to afford desired products.

### 2.3.3 General procedure for Preparation of substrate 34a-42a, 45a-47a<sup>2</sup>

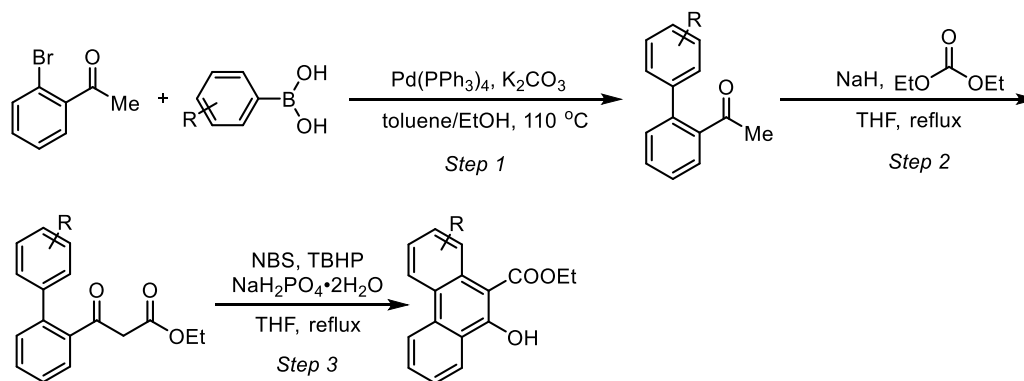

**Step 1:** To a stirred solution of aryl bromide (5.0 mmol, 1.0 equiv) and aryl boronic acid (5.0 mmol, 1.2 equiv) in a toluene/ethanol (3:1) mixture was added  $\text{K}_2\text{CO}_3$  (15.0 mmol, 3.0 equiv) and  $\text{Pd}(\text{PPh}_3)_4$  (0.5 mmol, 0.1 equiv). The resulting suspension was heated at 110 °C under nitrogen atmosphere for 11 h. The solvent was removed under reduced pressure and the crude residue was extracted with ethyl acetate. The combined organic layers were washed with brine and dried over  $\text{MgSO}_4$ , concentrated, and purified by flash chromatography to afford desired products.

**Step 2:** To a dried three-necked flask equipped with a dropping funnel, a condenser, and a magnetic stirrer was added NaH (5.0 mmol, 2.8 equiv), diethyl carbonate (5.0 mmol, 2.8 equiv), and anhydrous THF (1.0 M). The mixture was heated to 80 °C. Then a solution of ketone (5.0 mmol, 1.0 equiv) in anhydrous THF (20.0 mL) was added dropwise from the dropping funnel over 30 min. After the addition, the mixture was heated to reflux until the ketone was completely consumed (1-3 h).

When the reaction was cooled to room temperature, glacial acetic acid was added dropwise. Later, ice-water was added until the solid was dissolved completely. The organic layer was separated, and the water layer was extracted with ethyl acetate. The combined organic solution was washed with water and brine, then dried over  $\text{MgSO}_4$ , concentrated, and purified by flash chromatography to afford desired products.

**Step 3:** Products of step 2 (2.0 mmol, 1.0 equiv) was added to a mixture of NBS (0.8 mmol, 0.4 equiv) and  $\text{NaH}_2\text{PO}_4 \cdot 2\text{H}_2\text{O}$  (2.0 mmol, 1.0 equiv) under air, and then TBHP (7.0 mmol, 3.5 equiv, in 70%  $\text{H}_2\text{O}$ ) and THF (16 mL) were added. After the mixture was stirred under reflux for 15 h, the resulting mixture was purified by silica gel column chromatography to give desired products.

## 2.4 Procedure for derivatization of products

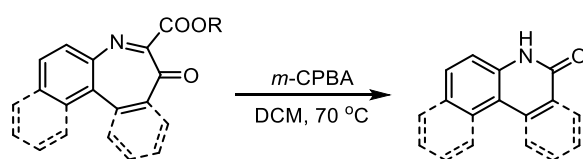

To a 25 mL round-bottom flask were added nitrogen atom insertion product (0.1 mmol, 1.0 equiv), *m*-CPBA (0.3 mmol, 3.0 equiv) and DCM. The reaction mixture was stirred at 70 °C until the raw materials had been completely consumed monitored by TLC. The organic layers were washed with saturated sodium bicarbonate solution and dried over  $\text{MgSO}_4$ , concentrated, and purified by flash chromatography to afford desired products.

## 3. Mechanism studies

### 3.1 Radical inhibition experiment

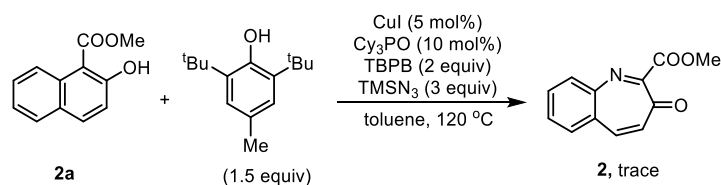

**2a** (0.1 mmol), CuI (1.0 mg, 0.005 mmol, 5 mol%), were added to an oven dried high pressure tube. Cy<sub>3</sub>PO (3.0 mg, 0.01 mmol, 10 mol%), BHT (33.0 mg, 0.15 mmol, 1.5 equiv), toluene (1.0 mL), TBPB (38.0 μL, 0.2 mmol, 2.0 equiv), TMSN<sub>3</sub> (39.0 μL, 0.3 mmol, 3.0 equiv), were added in glovebox. Then the reaction was stirred at 120 °C for 12 h. After cooling down to room temperature (monitored by TLC), only trace of product **2** was detected.

### 3.2 Cyclic Voltammetry

The cyclic voltammetry was carried out with a Shanghai Chenhua CHI760E workstation. A glassy-carbon(GC) electrode (3mm-diameter, disc-electrode) was used as the working electrode, a Pt plate was used as the auxiliary electrode and an Ag/Ag<sup>+</sup> electrode was used as a reference electrode, respectively. The measurements were carried out at a scan rate of 50 mV s<sup>-1</sup>, if not indicated otherwise. The operation temperature was 298 K.

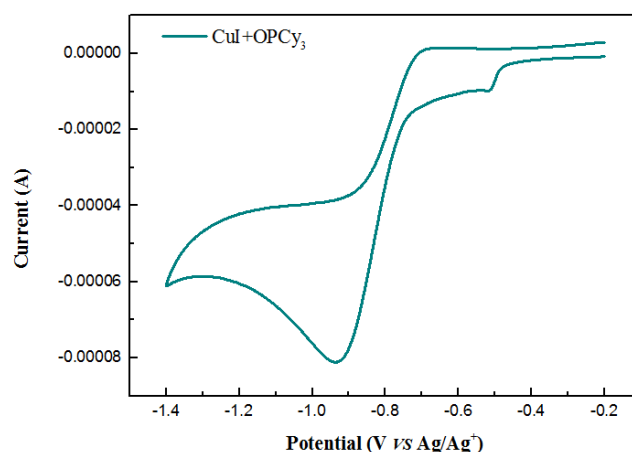

**Figure S2.** Cyclic voltammograms of CuI and Cy<sub>3</sub>PO system at 50 mVs<sup>-1</sup> in MeCN, <sup>11</sup>Bu<sub>4</sub>NBF<sub>4</sub> (0.1 M in MeCN), CuI and Cy<sub>3</sub>PO (1 mM).

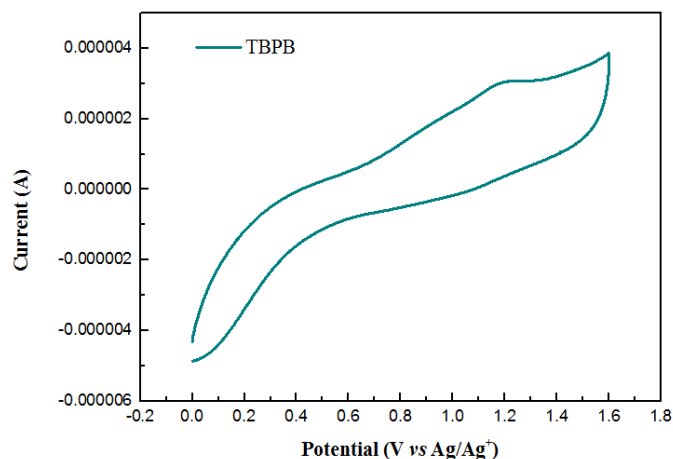

**Figure S3.** Cyclic voltammograms of TBPB at  $50 \text{ mVs}^{-1}$  in MeCN,  ${}^n\text{Bu}_4\text{NBF}_4$  (0.1 M in MeCN), TBPB (10 mM).

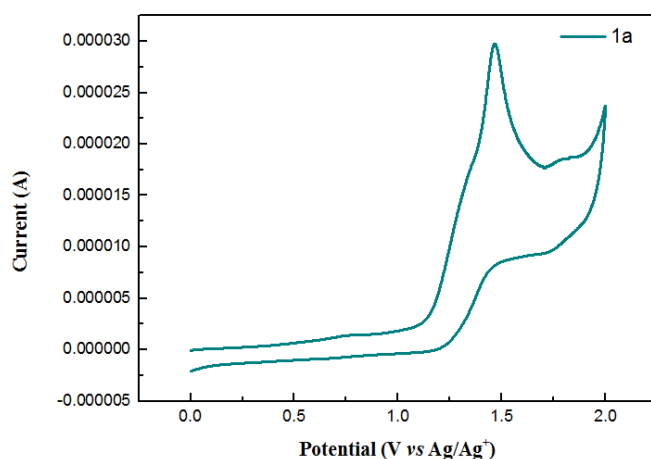

**Figure S4.** Cyclic voltammograms of 1a at  $50 \text{ mVs}^{-1}$  in MeCN,  ${}^n\text{Bu}_4\text{NBF}_4$  (0.1 M in MeCN), 1a (1 mM).

To gain further insights into the reaction mechanism, mechanistic studies were performed by means of cyclic voltammetry (CV). An irreversible reduction peak of the mixture CuI and  $\text{Cy}_3\text{PO}$  at  $-0.94 \text{ V}$  (vs  $\text{Ag}/\text{Ag}^+$  in MeCN) was observed. Moreover, CV experiments on substrate **1a** and TBPB gave the irreversible oxidation peaks at  $+1.46 \text{ V}$  (vs  $\text{Ag}/\text{Ag}^+$  in MeCN) and  $+1.19 \text{ V}$  (vs  $\text{Ag}/\text{Ag}^+$  in MeCN) respectively. These results suggested TBPB underwent reduction preferentially, which was consistent with the plausible mechanism that a single-electron transfer between Cu(I) and TBPB.

### 3.3 Mechanistic studies for carbon atom deletion

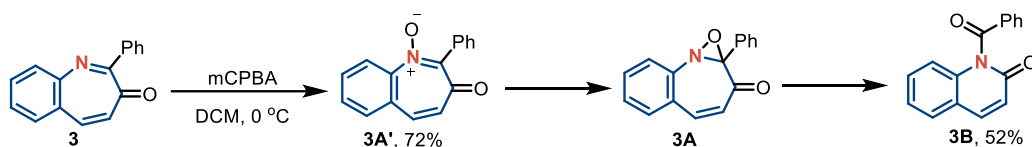

A series of control experiments were performed to investigate the reaction pathway. The reaction of **3** was initially conducted with mCPBA at 0 °C, which resulted in nitron intermediate **3A'** in 72% yield. Isomerization of **3A'** propels the formation of **3A**. Furthermore, heating **3A'** in DCM led to intermediate **3B** without the need for additional reagents. These results indicated that the reaction proceeded via oxaziridine intermediate **3A** and amide intermediate **3B**.

### 3-oxo-2-phenyl-3H-benzo[b]azepine 1-oxide (**3A'**).

Colorless solid (17.9 mg, 72% yield). Mp = 111.9 – 112.6 °C. <sup>1</sup>H NMR (400 MHz, DMSO-*d*<sub>6</sub>) δ 8.17 (d, *J* = 9.0 Hz, 1H), 7.87 (m, 3H), 7.82 – 7.76 (m, 1H), 7.62 – 7.57 (m, 2H), 7.52 (m, 1H), 7.34 (m, 1H), 6.96 (d, *J* = 8.4 Hz, 1H), 6.69 (d, *J* = 9.6 Hz, 1H). <sup>13</sup>C NMR (100 MHz, DMSO-*d*<sub>6</sub>) δ 173.0, 161.0, 142.0, 137.1, 135.8, 131.4, 131.3, 130.5, 129.8, 129.3, 123.4, 121.1, 119.6, 114.0. HRMS (ESI) Calculated for C<sub>16</sub>H<sub>12</sub>NO<sub>2</sub> [M+H]<sup>+</sup>: 250.0862; Found: 250.0854.

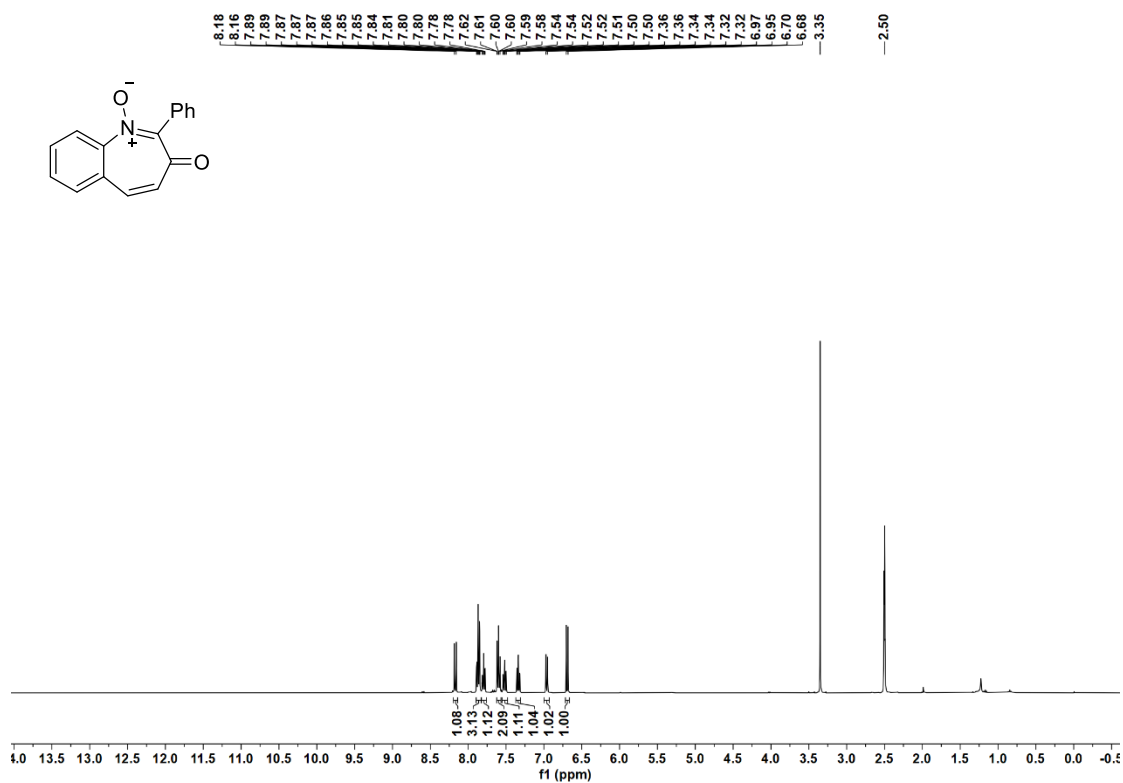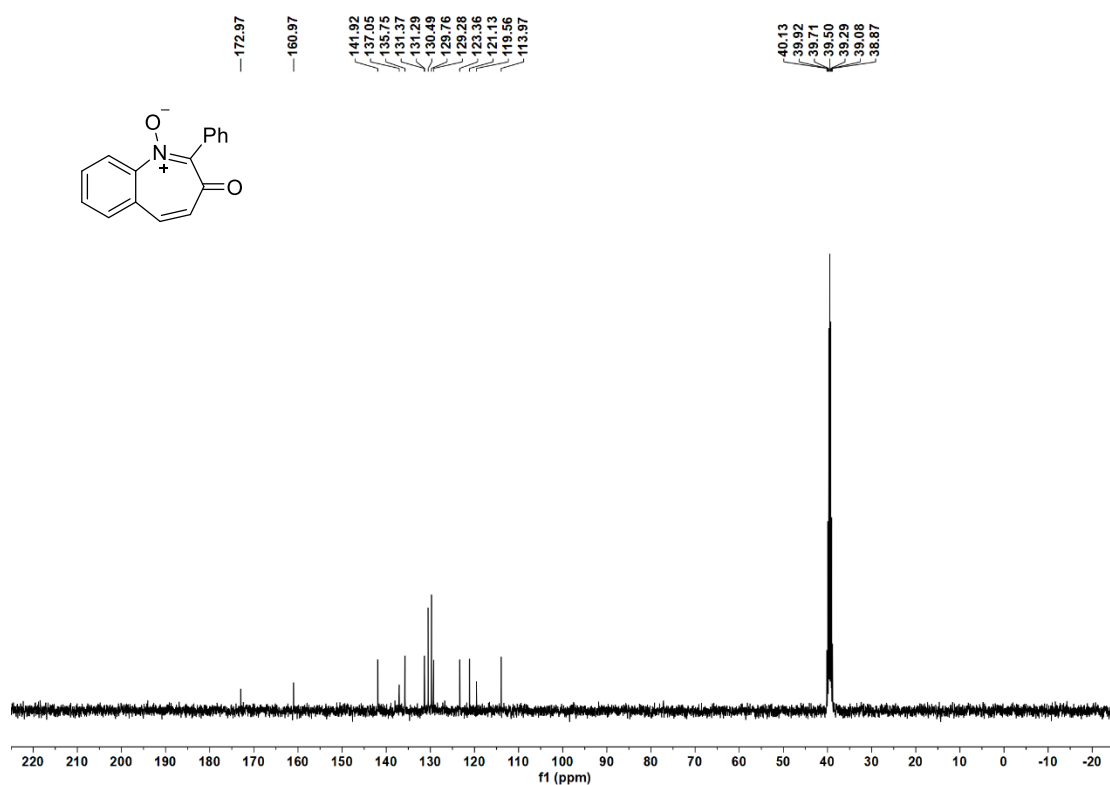

**N-Acyl quinolin-2(1H)-ones (3B).** Colorless solid. Mp = 122.3 – 123.7 °C.

<sup>1</sup>H NMR (400 MHz, CDCl<sub>3</sub>) δ 8.29 (m, 3H), 8.06 (d, *J* = 8.5 Hz, 1H), 7.89 (d, *J* =



8.1Hz, 1H), 7.75 (m, 1H), 7.70 – 7.63 (m, 1H), 7.56 (m, 3H), 7.33 (d,  $J = 8.7$  Hz, 1H).  $^{13}\text{C}$  NMR (100 MHz,  $\text{CDCl}_3$ )  $\delta$  165.0, 156.6, 146.6, 140.0, 134.0, 130.5, 130.2, 128.9, 128.6, 128.6, 127.5, 127.2, 126.6, 115.9. HRMS (ESI) Calculated for  $\text{C}_{16}\text{H}_{12}\text{NO}_2$   $[\text{M}+\text{H}]^+$ : 250.0862; Found: 250.0857.

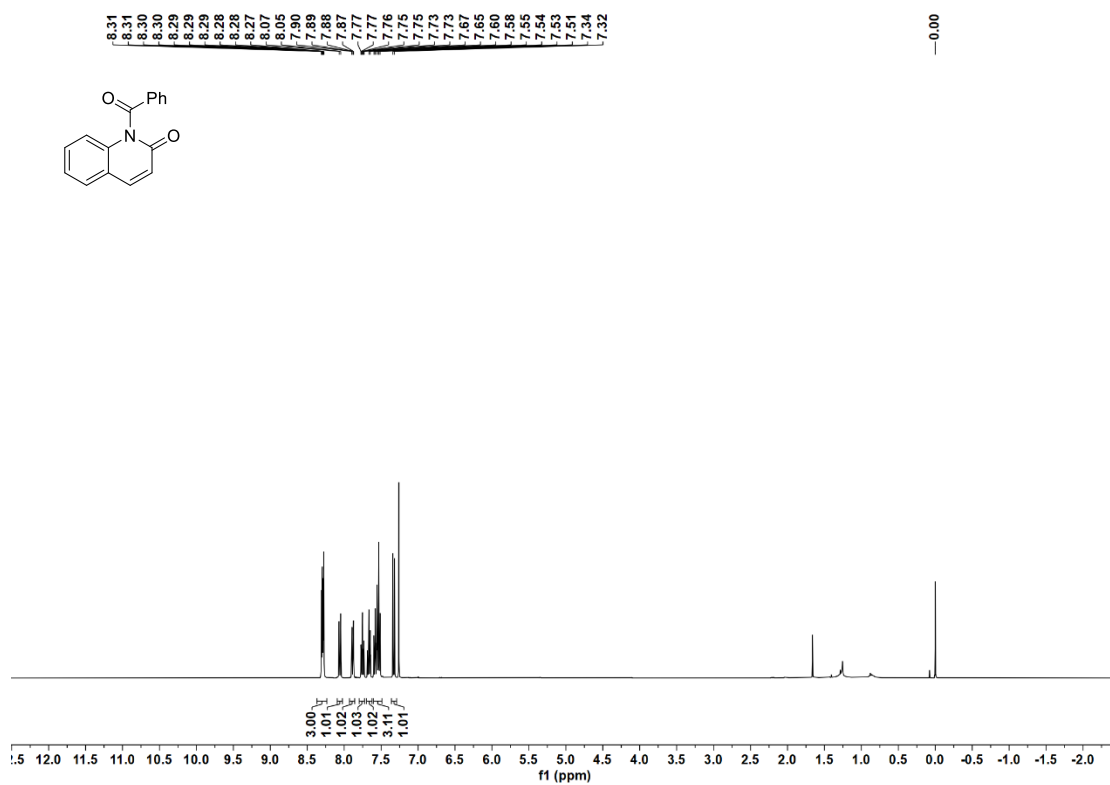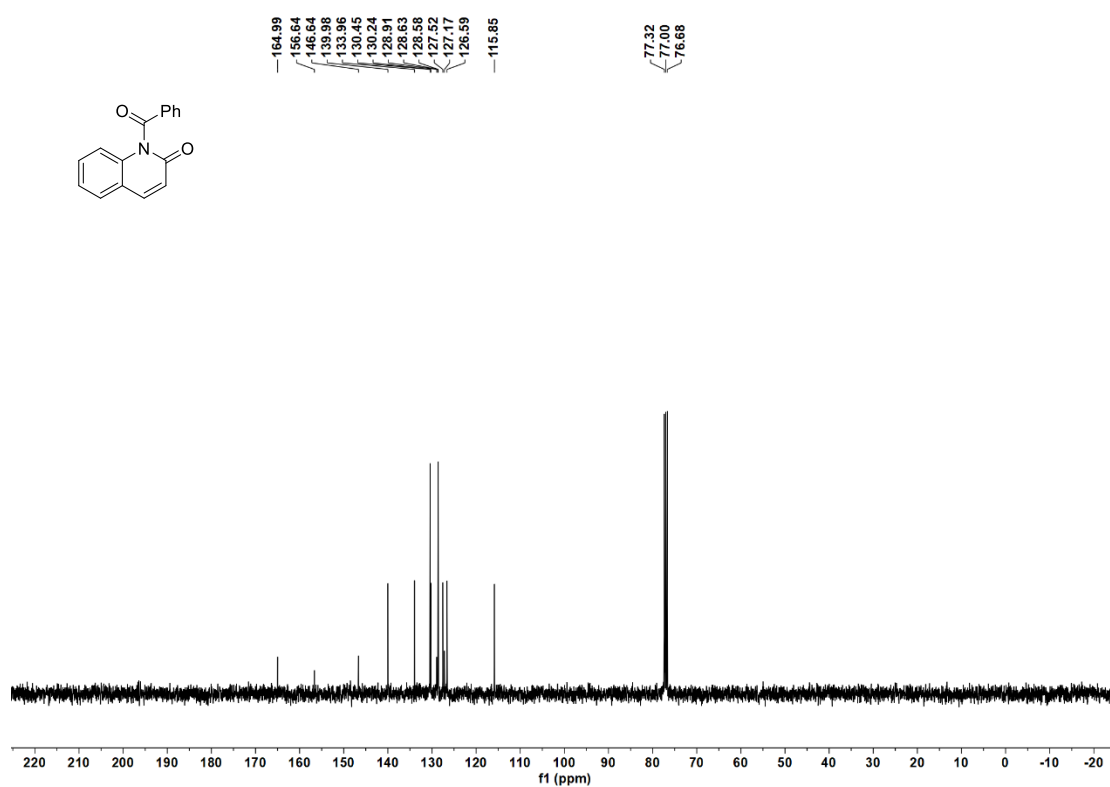

## 4. X-Ray crystallographic data

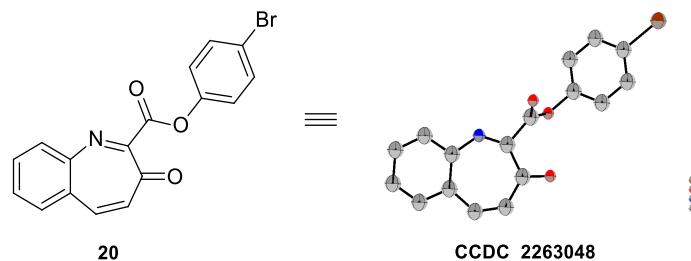

**Table S5** Crystal data and structure refinement for **20**

|                                             |                                       |
|---------------------------------------------|---------------------------------------|
| Empirical formula                           | $C_{17}H_{10}BrNO_3$                  |
| Formula weight                              | 356.17                                |
| Temperature/K                               | 220.0K                                |
| Crystal system                              | Monoclinic                            |
| Space group                                 | P 21/c                                |
| a/Å                                         | 5.4496(2)                             |
| b/Å                                         | 20.6183(6)                            |
| c/Å                                         | 13.2918(4)                            |
| $\alpha/^\circ$                             | 90                                    |
| $\beta/^\circ$                              | 99.8540(10) °                         |
| $\gamma/^\circ$                             | 90                                    |
| Volume/Å <sup>3</sup>                       | 1471.45(8)                            |
| Z                                           | 4                                     |
| Density (calculated) g/cm <sup>3</sup>      | 1.608                                 |
| $\mu/\text{mm}^{-1}$                        | 2.584                                 |
| F(000)                                      | 712                                   |
| Crystal size/mm <sup>3</sup>                | 0.180 × 0.130 × 0.120                 |
| Radiation                                   | MoK $\alpha$ (wavelength = 1.34138)   |
| Index ranges                                | -4 ≤ h ≤ 6, -25 ≤ k ≤ 24 -15 ≤ l ≤ 16 |
| Reflections collected                       | 14842                                 |
| Independent reflections                     | 2964 [ $R_{\text{int}} = 0.0464$ ]    |
| Data/restraints/parameters                  | 2964 / 0 / 199                        |
| Goodness-of-fit on $F^2$                    | 1.081                                 |
| Final R indexes [ $I \geq 2\sigma$ (I)]     | $R_1 = 0.0344$ , $wR_2 = 0.0934$      |
| Final R indexes [all data]                  | $R_1 = 0.0374$ , $wR_2 = 0.0962$      |
| Largest diff. peak/hole / e Å <sup>-3</sup> | 0.427 and -0.711                      |

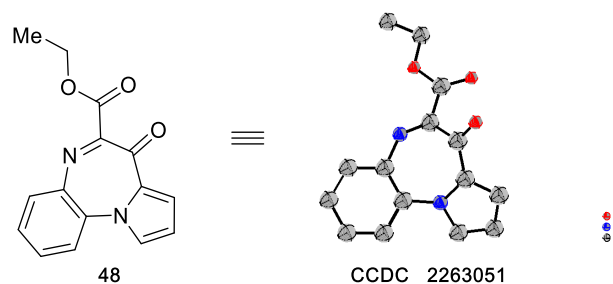

**Table S6** Crystal data and structure refinement for **48**

|                                             |                                                               |
|---------------------------------------------|---------------------------------------------------------------|
| Empirical formula                           | C <sub>15</sub> H <sub>12</sub> N <sub>2</sub> O <sub>3</sub> |
| Formula weight                              | 268.27                                                        |
| Temperature/K                               | 298.0K                                                        |
| Crystal system                              | Monoclinic                                                    |
| Space group                                 | P 21/n                                                        |
| a/Å                                         | 7.7369(6)                                                     |
| b/Å                                         | 9.7927(9)                                                     |
| c/Å                                         | 16.8291(16)                                                   |
| α/°                                         | 90                                                            |
| β/°                                         | 100.727(4)                                                    |
| γ/°                                         | 90                                                            |
| Volume/Å <sup>3</sup>                       | 1252.78(19)                                                   |
| Z                                           | 4                                                             |
| Density (calculated) g/cm <sup>3</sup>      | 1.422                                                         |
| μ/mm <sup>-1</sup>                          | 0.535                                                         |
| F(000)                                      | 560                                                           |
| Crystal size/mm <sup>3</sup>                | 0.130 × 0.120 × 0.100                                         |
| Radiation                                   | MoKα (wavelength = 1.34138)                                   |
| Index ranges                                | -9 ≤ h ≤ 9, -9 ≤ k ≤ 11, -19 ≤ l ≤ 19                         |
| Reflections collected                       | 16086                                                         |
| Independent reflections                     | 2215 [R <sub>int</sub> = 0.1040]                              |
| Data/restraints/parameters                  | 2215 / 0 / 163                                                |
| Goodness-of-fit on F <sup>2</sup>           | 1.084                                                         |
| Final R indexes [I ≥ 2σ (I)]                | R <sub>1</sub> = 0.0935, wR <sub>2</sub> = 0.2433             |
| Final R indexes [all data]                  | R <sub>1</sub> = 0.1478, wR <sub>2</sub> = 0.3017             |
| Largest diff. peak/hole / e Å <sup>-3</sup> | 1.125 and -0.448                                              |

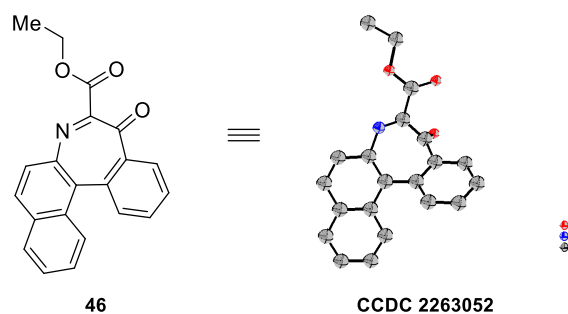

**Table S7** Crystal data and structure refinement for **46**

|                                             |                                                   |
|---------------------------------------------|---------------------------------------------------|
| Empirical formula                           | C <sub>21</sub> H <sub>15</sub> NO <sub>3</sub>   |
| Formula weight                              | 329.34                                            |
| Temperature/K                               | 200.0K                                            |
| Crystal system                              | Monoclinic                                        |
| Space group                                 | P 21/n                                            |
| a/Å                                         | 7.7620(5)                                         |
| b/Å                                         | 12.9308(9)                                        |
| c/Å                                         | 15.9453(10)                                       |
| α/°                                         | 90                                                |
| β/°                                         | 94.829(2)                                         |
| γ/°                                         | 90                                                |
| Volume/Å <sup>3</sup>                       | 1594.73(18)                                       |
| Z                                           | 4                                                 |
| Density (calculated) g/cm <sup>3</sup>      | 1.372                                             |
| μ/mm <sup>-1</sup>                          | 0.476                                             |
| F(000)                                      | 688                                               |
| Crystal size/mm <sup>3</sup>                | 0.180 × 0.130 × 0.100                             |
| Radiation                                   | MoKα (wavelength = 1.34138)                       |
| Index ranges                                | -9 ≤ h ≤ 9, -14 ≤ k ≤ 16, -19 ≤ l ≤ 19            |
| Reflections collected                       | 15353                                             |
| Independent reflections                     | 3266 [R <sub>int</sub> = 0.1532]                  |
| Data/restraints/parameters                  | 3266 / 0 / 227                                    |
| Goodness-of-fit on F <sup>2</sup>           | 0.947                                             |
| Final R indexes [I ≥ 2σ (I)]                | R <sub>1</sub> = 0.0477, wR <sub>2</sub> = 0.0962 |
| Final R indexes [all data]                  | R <sub>1</sub> = 0.1257, wR <sub>2</sub> = 0.1195 |
| Largest diff. peak/hole / e Å <sup>-3</sup> | 0.248 and -0.309                                  |

## 5. NMR spectra data of compounds

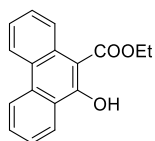

**Ethyl 10-hydroxyphenanthrene-9-carboxylate (1a).**<sup>2</sup> Colorless solid. Mp = 132.4 – 133.8 °C. <sup>1</sup>H NMR (400 MHz, CDCl<sub>3</sub>) δ 13.24 (s, 1H), 8.70 (dd, *J* = 8.4, *J* = 1.3 Hz, 1H), 8.50 – 8.44 (m, 3H), 7.69 – 7.63 (m, 1H), 7.56 – 7.51 (m, 1H), 7.50 – 7.45 (m, 1H), 7.41 – 7.36 (m, 1H), 4.51 (q, *J* = 7.2 Hz, 2H), 1.45 (t, *J* = 7.1 Hz, 3H). <sup>13</sup>C NMR (100 MHz, CDCl<sub>3</sub>) δ 172.9, 162.7, 133.6, 130.4, 129.4, 127.5, 126.8, 126.0, 125.9, 125.2, 124.9, 124.2, 122.8, 122.4, 101.5, 62.0, 14.3. HRMS (ESI): Calculated for C<sub>17</sub>H<sub>13</sub>O<sub>3</sub> [M-H]<sup>-</sup>: 265.0859; Found: 265.0870.

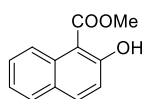

**Methyl 2-hydroxy-1-naphthoate (2a).**<sup>1</sup> Colorless solid. Mp = 92.6 – 94.2 °C. <sup>1</sup>H NMR (400 MHz, CDCl<sub>3</sub>) δ 12.27 (s, 1H), 8.70 (d, *J* = 8.9 Hz, 1H), 7.83 (d, *J* = 9.0 Hz, 1H), 7.70 (dd, *J* = 8.1, *J* = 1.6 Hz, 1H), 7.55 – 7.48 (m, 1H), 7.37 – 7.29 (m, 1H), 7.13 (dd, *J* = 9.0, *J* = 1.1 Hz, 1H), 4.05 (s, 3H). <sup>13</sup>C NMR (100 MHz, CDCl<sub>3</sub>) δ 172.7, 164.3, 136.7, 131.6, 128.9, 128.5, 128.3, 125.2, 123.5, 119.1, 104.4, 52.2. HRMS (ESI): Calculated for C<sub>12</sub>H<sub>9</sub>O<sub>3</sub> [M-H]<sup>-</sup>: 201.0546; Found: 201.1544.

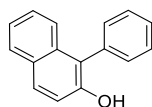

**1-Phenylanthracen-2-ol (3a).**<sup>5</sup> Colorless solid. Mp = 97.8 – 101.2 °C. <sup>1</sup>H NMR (400 MHz, CDCl<sub>3</sub>) δ 7.68 – 7.61 (m, 2H), 7.43 – 7.36 (m, 2H), 7.33 – 7.24 (m, 4H), 7.21 – 7.14 (m, 2H), 7.12 (d, *J* = 8.8 Hz, 1H), 5.08 (s, 1H). <sup>13</sup>C NMR (100 MHz, CDCl<sub>3</sub>) δ 150.1, 134.2, 133.2, 131.1, 129.5, 129.4, 128.8, 128.3, 128.0, 126.4, 124.5,

123.2, 120.9, 117.3. HRMS (ESI): Calculated for C<sub>16</sub>H<sub>11</sub>O [M-H]<sup>-</sup>: 219.0804; Found: 219.0823.

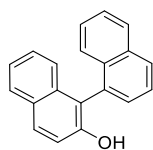

**[1,1'-Binaphthalen]-2-ol (4a).**<sup>5</sup> Colorless solid. Mp = 118.6 – 120.2 °C. <sup>1</sup>H NMR (400 MHz, CDCl<sub>3</sub>) δ 7.89 – 7.81 (m, 2H), 7.79 – 7.71 (m, 2H), 7.50 (t, *J* = 7.6 Hz, 1H), 7.42 – 7.36 (m, 2H), 7.27 (d, *J* = 8.3 Hz, 1H), 7.23 – 7.17 (m, 3H), 7.12 – 7.07 (m, 1H), 6.99 (d, *J* = 8.4 Hz, 1H), 4.82 (s, 1H). <sup>13</sup>C NMR (100 MHz, CDCl<sub>3</sub>) δ 150.9, 134.1, 133.8, 132.8, 131.4, 131.1, 129.8, 129.6, 129.2, 128.9, 128.4, 128.0, 126.8, 126.5, 126.0, 125.7, 124.9, 123.3, 118.7, 117.4. HRMS (ESI): Calculated for C<sub>20</sub>H<sub>13</sub>O [M-H]<sup>-</sup>: 269.0961; Found: 269.0961.

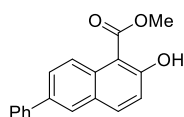

**Methyl 2-hydroxy-6-phenyl-1-naphthoate (5a).**<sup>3</sup> Colorless solid. Mp = 158.6 – 159.3 °C. <sup>1</sup>H NMR (400 MHz, CDCl<sub>3</sub>) δ 12.20 (s, 1H), 8.61 (d, *J* = 8.9 Hz, 1H), 7.76 – 7.70 (m, 2H), 7.65 (dd, *J* = 8.7, *J* = 2.2 Hz, 1H), 7.54 (d, *J* = 7.6 Hz, 2H), 7.33 (t, *J* = 7.6 Hz, 2H), 7.23 (t, *J* = 7.3 Hz, 1H), 7.01 (d, *J* = 9.1 Hz, 1H), 3.92 (s, 3H). <sup>13</sup>C NMR (100 MHz, CDCl<sub>3</sub>) δ 172.7, 164.3, 140.1, 137.0, 136.0, 130.7, 128.8, 127.7, 127.3, 127.1, 126.9, 126.6, 126.8, 119.6, 104.4, 52.3. HRMS (ESI): Calculated for C<sub>18</sub>H<sub>13</sub>O<sub>3</sub> [M-H]<sup>-</sup>: 277.0859; Found: 277.0876.

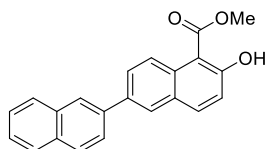

**Methyl 6-hydroxy-[2,2'-binaphthalene]-5-carboxylate (6a).** Colorless solid. Mp = 214.6 – 215.4 °C. <sup>1</sup>H NMR (400 MHz, CDCl<sub>3</sub>) δ 12.33 (s, 1H), 8.80 (d, *J* = 9.0 Hz, 1H), 8.12 – 8.02 (m, 2H), 7.95 – 7.90 (m, 4H), 7.87 – 7.80 (m, 2H), 7.52 – 7.46 (m, 2H), 7.18 (d, *J* = 8.9 Hz, 1H), 4.09 (s, 3H). <sup>13</sup>C NMR (100 MHz, CDCl<sub>3</sub>) δ 172.8,

164.4, 137.5, 137.1, 136.0, 133.7, 132.6, 130.9, 129.0, 128.5, 128.2, 127.9, 127.6, 127.0, 126.4, 126.0, 125.9, 125.7, 125.3, 119.7, 104.6, 52.5. HRMS (ESI): Calculated for C<sub>22</sub>H<sub>15</sub>O<sub>3</sub> [M-H]<sup>-</sup>: 327.1016; Found: 327.1015.

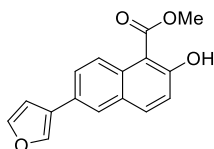

**Methyl 6-(furan-3-yl)-2-hydroxy-1-naphthoate (7a).** Colorless solid. Mp = 112.0 – 112.5 °C. <sup>1</sup>H NMR (400 MHz, CDCl<sub>3</sub>) δ 12.17 (s, 1H), 8.61 (d, *J* = 9.0 Hz, 1H), 7.77 – 7.71 (m, 2H), 7.68 (d, *J* = 2.0 Hz, 1H), 7.57 (dd, *J* = 9.1, *J* = 2.2 Hz, 1H), 7.42 (s, 1H), 7.06 (d, *J* = 9.0 Hz, 1H), 6.70 (s, 1H), 3.99 (s, 3H). <sup>13</sup>C NMR (100 MHz, CDCl<sub>3</sub>) δ 172.7, 164.1, 143.8, 138.6, 136.7, 130.6, 128.9, 127.6, 126.7, 125.8, 125.7, 125.2, 119.7, 108.7, 104.7, 52.4. HRMS (ESI): Calculated for C<sub>16</sub>H<sub>11</sub>O<sub>4</sub> [M-H]<sup>-</sup>: 267.0652; Found: 267.0650.

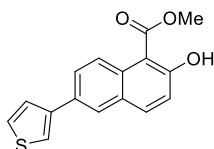

**Methyl 2-hydroxy-6-(thiophen-3-yl)-1-naphthoate (8a).** Colorless solid. Mp = 138.2 – 139.8 °C. <sup>1</sup>H NMR (400 MHz, CDCl<sub>3</sub>) δ 12.28 (s, 1H), 8.78 – 8.73 (m, 1H), 7.94 – 7.88 (m, 2H), 7.83 – 7.78 (m, 1H), 7.56 – 7.53 (m, 1H), 7.51 – 7.48 (m, 1H), 7.45 – 7.41 (m, 1H), 7.18 (dd, *J* = 9.0, *J* = 0.9 Hz, 1H), 4.11 (s, 3H). <sup>13</sup>C NMR (100 MHz, CDCl<sub>3</sub>) δ 172.7, 164.3, 141.5, 136.9, 131.0, 130.7, 128.9, 127.2, 126.4, 126.2, 125.9, 125.8, 120.3, 119.7, 104.7, 52.5. HRMS (ESI): Calculated for C<sub>16</sub>H<sub>11</sub>O<sub>3</sub>S [M-H]<sup>-</sup>: 283.0423; Found: 283.0417.

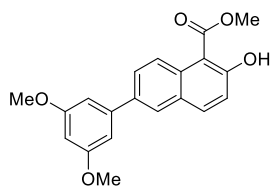

**Methyl 6-(3,5-dimethoxyphenyl)-2-hydroxy-1-naphthoate (9a).** Colorless solid. Mp = 165.4 – 166.4 °C. <sup>1</sup>H NMR (400 MHz, CDCl<sub>3</sub>) δ 12.37 – 12.22 (m, 1H), 8.77

(d,  $J = 9.1$  Hz, 1H), 7.92 (d,  $J = 8.9$  Hz, 2H), 7.78 (dd,  $J = 9.1$ ,  $J = 2.1$  Hz, 1H), 7.18 (d,  $J = 9.0$  Hz, 1H), 6.83 (d,  $J = 2.3$  Hz, 2H), 6.49 (t,  $J = 2.3$  Hz, 1H), 4.11 (s, 3H), 3.86 (s, 6H).  $^{13}\text{C}$  NMR (100 MHz,  $\text{CDCl}_3$ )  $\delta$  172.7, 164.4, 161.1, 142.5, 137.1, 136.1, 131.0, 128.8, 127.7, 126.8, 125.8, 119.7, 105.3, 104.5, 99.2, 55.4, 52.4. HRMS (ESI): Calculated for  $\text{C}_{20}\text{H}_{17}\text{O}_5$   $[\text{M}-\text{H}]^-$ : 337.1071; Found: 337.1071.

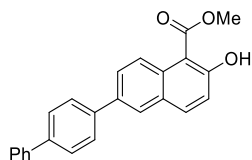

**Methyl 6-([1,1'-biphenyl]-4-yl)-2-hydroxy-1-naphthoate (10a).** Colorless solid. Mp = 258.7 – 259.2 °C.  $^1\text{H}$  NMR (400 MHz,  $\text{CDCl}_3$ )  $\delta$  12.23 (s, 1H), 8.74 (d,  $J = 9.1$  Hz, 1H), 7.92 – 7.86 (m, 2H), 7.79 (dd,  $J = 9.0$ ,  $J = 2.2$  Hz, 1H), 7.70 (d,  $J = 8.0$  Hz, 2H), 7.63 (d,  $J = 8.0$  Hz, 2H), 7.58 (d,  $J = 7.5$  Hz, 2H), 7.39 (t,  $J = 7.5$  Hz, 2H), 7.29 (t,  $J = 7.4$  Hz, 1H), 7.12 (d,  $J = 8.9$  Hz, 1H), 4.05 (s, 3H).  $^{13}\text{C}$  NMR (100 MHz,  $\text{CDCl}_3$ )  $\delta$  172.8, 164.4, 140.6, 140.2, 139.1, 137.1, 135.6, 130.9, 129.0, 128.8, 127.6, 127.5, 127.4, 127.0, 126.7, 126.6, 125.9, 119.8, 104.6, 52.5. HRMS (ESI): Calculated for  $\text{C}_{24}\text{H}_{17}\text{O}_3$   $[\text{M}-\text{H}]^-$ : 353.1172; Found: 353.1190.

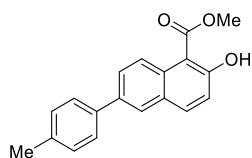

**Methyl 2-hydroxy-6-(p-tolyl)-1-naphthoate (11a).** Colorless solid. Mp = 158.0 – 159.8 °C.  $^1\text{H}$  NMR (400 MHz,  $\text{CDCl}_3$ )  $\delta$  12.29 (s, 1H), 8.73 (d,  $J = 9.1$  Hz, 1H), 7.88 – 7.84 (m, 2H), 7.76 (dd,  $J = 9.0$ ,  $J = 2.1$  Hz, 1H), 7.58 – 7.54 (m, 2H), 7.25 (d,  $J = 7.8$  Hz, 2H), 7.13 (d,  $J = 9.0$  Hz, 1H), 4.06 (s, 3H), 2.39 (s, 3H).  $^{13}\text{C}$  NMR (100 MHz,  $\text{CDCl}_3$ )  $\delta$  172.7, 164.3, 137.3, 137.1, 137.0, 136.0, 130.6, 129.6, 128.9, 127.6, 126.8, 126.3, 125.7, 119.5, 104.5, 52.3, 21.1. HRMS (ESI): Calculated for  $\text{C}_{19}\text{H}_{15}\text{O}_3$   $[\text{M}-\text{H}]^-$ : 291.1016; Found: 291.1027.



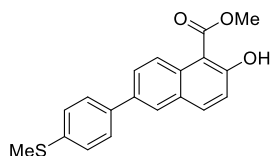

**Methyl 2-hydroxy-6-(4-(methylthio)phenyl)-1-naphthoate (12a).** Colorless solid. Mp = 160.1 – 161.1 °C.  $^1\text{H}$  NMR (400 MHz,  $\text{CDCl}_3$ )  $\delta$  12.29 (s, 1H), 8.72 (d,  $J = 9.1$  Hz, 1H), 7.86 – 7.82 (m, 2H), 7.75 – 7.70 (m, 1H), 7.58 – 7.54 (m, 2H), 7.33 – 7.29 (m, 2H), 7.13 (dd,  $J = 9.1$ ,  $J = 1.1$  Hz, 1H), 4.06 (s, 3H), 2.50 (s, 3H).  $^{13}\text{C}$  NMR (100 MHz,  $\text{CDCl}_3$ )  $\delta$  172.6, 164.3, 137.7, 136.9, 136.8, 135.3, 130.7, 128.8, 127.3, 127.2, 126.8, 126.2, 125.8, 119.6, 104.4, 52.3, 15.7. HRMS (ESI): Calculated for  $\text{C}_{19}\text{H}_{15}\text{O}_3\text{S}$  [M-H] $^-$ : 323.0736, Found: 323.0729.

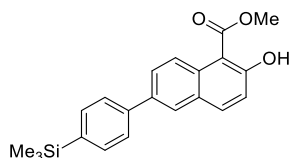

**Methyl 2-hydroxy-6-(4-(trimethylsilyl)phenyl)-1-naphthoate (13a).** Colorless solid. Mp = 113.8 – 114.4 °C.  $^1\text{H}$  NMR (400 MHz,  $\text{CDCl}_3$ )  $\delta$  12.30 (s, 1H), 8.73 (d,  $J = 9.3$  Hz, 1H), 7.89 – 7.84 (m, 2H), 7.77 (dd,  $J = 9.0$ ,  $J = 2.1$  Hz, 1H), 7.63 (t,  $J = 8.1$  Hz, 4H), 7.13 (d,  $J = 9.0$  Hz, 1H), 4.04 (s, 3H), 0.31 (s, 9H).  $^{13}\text{C}$  NMR (100 MHz,  $\text{CDCl}_3$ )  $\delta$  172.7, 164.4, 140.6, 139.3, 137.0, 136.0, 133.9, 130.8, 128.9, 127.6, 126.7, 126.3, 125.8, 119.6, 104.5, 52.3, -1.1. HRMS (ESI): Calculated for  $\text{C}_{21}\text{H}_{21}\text{O}_3\text{Si}$  [M-H] $^-$ : 349.1254; Found: 349.1253.

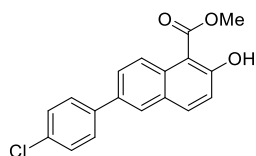

**Methyl 6-(4-chlorophenyl)-2-hydroxy-1-naphthoate (14a).** Colorless solid. Mp = 175.9 – 176.9 °C.  $^1\text{H}$  NMR (400 MHz,  $\text{CDCl}_3$ )  $\delta$  12.31 (s, 1H), 8.79 (d,  $J = 9.2$  Hz, 1H), 7.94 – 7.89 (m, 2H), 7.76 (dd,  $J = 9.1$ ,  $J = 2.4$  Hz, 1H), 7.63 – 7.60 (m, 2H), 7.46 – 7.42 (m, 2H), 7.20 (d,  $J = 8.7$  Hz, 1H), 4.12 (s, 3H).  $^{13}\text{C}$  NMR (100 MHz,  $\text{CDCl}_3$ )  $\delta$  172.7, 164.5, 138.7, 137.0, 134.9, 133.4, 131.0, 129.0, 128.9, 128.3, 127.4,

126.7, 126.0, 119.9, 104.6, 52.5. HRMS (ESI): Calculated for  $C_{18}H_{12}ClO_3$   $[M-H]^-$ : 311.0469; Found: 311.0486.

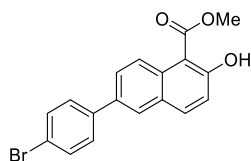

**Methyl 6-(4-bromophenyl)-2-hydroxy-1-naphthoate (15a).** Colorless solid. Mp = 139.2 – 140.1 °C.  $^1H$  NMR (400 MHz,  $CDCl_3$ )  $\delta$  12.30 (s, 1H), 8.70 (d,  $J = 8.9$  Hz, 1H), 7.85 – 7.77 (m, 2H), 7.67 (dd,  $J = 8.7$ ,  $J = 2.3$  Hz, 1H), 7.53 (d,  $J = 8.3$  Hz, 2H), 7.47 (d,  $J = 8.2$  Hz, 2H), 7.13 (d,  $J = 8.7$  Hz, 1H), 4.06 (s, 3H).  $^{13}C$  NMR (100 MHz,  $CDCl_3$ )  $\delta$  172.5, 164.4, 139.0, 136.9, 134.7, 131.9, 130.9, 128.8, 128.4, 127.1, 126.5, 125.9, 121.5, 119.8, 104.4, 52.4. HRMS (ESI): Calculated for  $C_{18}H_{12}BrO_3$   $[M-H]^-$ : 354.9964; Found: 354.9977.

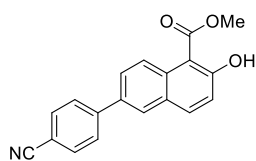

**Methyl 6-(4-cyanophenyl)-2-hydroxy-1-naphthoate (16a).** Colorless solid. Mp = 262.2 – 262.7 °C.  $^1H$  NMR (400 MHz,  $CDCl_3$ )  $\delta$  12.35 (s, 1H), 8.84 (d,  $J = 9.1$  Hz, 1H), 7.95 (t,  $J = 4.6$  Hz, 2H), 7.82 – 7.69 (m, 5H), 7.22 (d,  $J = 9.0$  Hz, 1H), 4.13 (s, 3H).  $^{13}C$  NMR (100 MHz,  $CDCl_3$ )  $\delta$  172.5, 164.9, 144.7, 137.1, 134.0, 132.7, 131.6, 128.8, 127.5, 127.3, 127.1, 126.3, 120.2, 118.9, 110.8, 104.6, 52.6. HRMS (ESI): Calculated for  $C_{19}H_{12}NO_3$   $[M-H]^-$ : 302.0812; Found: 302.0797.

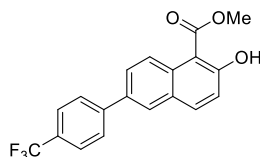

**Methyl 2-hydroxy-6-(4-(trifluoromethyl)phenyl)-1-naphthoate (17a).** Colorless solid. Mp = 130.9 – 131.7 °C.  $^1H$  NMR (400 MHz,  $CDCl_3$ )  $\delta$  12.33 (s, 1H), 8.67 (d,  $J = 9.0$  Hz, 1H), 7.78 – 7.75 (m, 2H), 7.67 – 7.61 (m, 5H), 7.09 (d,  $J = 9.0$  Hz, 1H), 4.02 (s, 3H).  $^{13}C$  NMR (100 MHz,  $CDCl_3$ )  $\delta$  172.7, 164.7, 143.6, 137.0, 134.2, 131.2,

129.6 (q,  $J = 32.4$  Hz), 129.3, 127.2 (t,  $J = 8.5$  Hz), 126.0, 125.9 (q,  $J = 3.8$  Hz), 124.5 (q,  $J = 270.6$  Hz), 119.8, 104.4, 52.3.  $^{19}\text{F}$  NMR (376 MHz,  $\text{CDCl}_3$ )  $\delta$  -62.7. HRMS (ESI): Calculated for  $\text{C}_{19}\text{H}_{12}\text{F}_3\text{O}_3$   $[\text{M-H}]^-$ : 345.0733; Found: 345.0735.

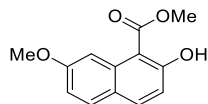

**Methyl 2-hydroxy-7-methoxy-1-naphthoate (18a).**<sup>3</sup> Colorless solid. Mp = 135.2 – 137.1 °C.  $^1\text{H}$  NMR (400 MHz,  $\text{CDCl}_3$ )  $\delta$  12.21 (s, 1H), 8.06 (d,  $J = 2.5$  Hz, 1H), 7.68 (d,  $J = 8.9$  Hz, 1H), 7.52 (d,  $J = 8.8$  Hz, 1H), 6.95 – 6.85 (m, 2H), 3.98 (s, 3H), 3.82 (s, 3H).  $^{13}\text{C}$  NMR (100 MHz,  $\text{CDCl}_3$ )  $\delta$  172.7, 165.0, 159.8, 136.6, 133.4, 130.5, 123.8, 116.5, 114.4, 106.1, 103.8, 55.1, 52.3. HRMS (ESI): Calculated for  $\text{C}_{13}\text{H}_{11}\text{O}_4$   $[\text{M-H}]^-$ : 231.0652; Found: 231.0656.

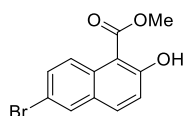

**Methyl 6-bromo-2-hydroxy-1-naphthoate (19a).**<sup>1</sup> Colorless solid. Mp = 102.2 – 103.4 °C.  $^1\text{H}$  NMR (400 MHz,  $\text{CDCl}_3$ )  $\delta$  12.18 (s, 1H), 8.48 (d,  $J = 9.3$  Hz, 1H), 7.75 (d,  $J = 2.3$  Hz, 1H), 7.65 (dd,  $J = 9.1$ ,  $J = 0.7$  Hz, 1H), 7.48 (dd,  $J = 9.3$ ,  $J = 2.3$  Hz, 1H), 7.06 (d,  $J = 9.1$  Hz, 1H), 4.00 (s, 3H).  $^{13}\text{C}$  NMR (100 MHz,  $\text{CDCl}_3$ )  $\delta$  172.3, 164.4, 135.6, 131.3, 130.8, 130.2, 129.8, 127.1, 120.5, 117.2, 104.7, 52.5. HRMS (ESI): Calculated for  $\text{C}_{12}\text{H}_8\text{BrO}_3$   $[\text{M-H}]^-$ : 278.9651; Found: 278.9664.

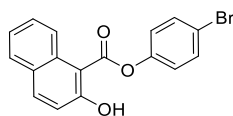

**4-Bromophenyl 2-hydroxy-1-naphthoate (20a).** Colorless solid. Mp = 147.1 – 148.7 °C.  $^1\text{H}$  NMR (400 MHz,  $\text{CDCl}_3$ )  $\delta$  11.93 (s, 1H), 8.84 (d,  $J = 8.8$  Hz, 1H), 7.96 (d,  $J = 9.1$  Hz, 1H), 7.82 – 7.77 (m, 1H), 7.63 – 7.58 (m, 3H), 7.44 – 7.38 (m, 1H), 7.22 – 7.16 (m, 3H).  $^{13}\text{C}$  NMR (100 MHz,  $\text{CDCl}_3$ )  $\delta$  170.9, 165.5, 148.8, 138.0, 132.8, 131.5, 129.4, 128.9, 128.7, 125.2, 124.0, 123.7, 119.7, 119.3, 103.7. HRMS (ESI): Calculated for  $\text{C}_{17}\text{H}_{10}\text{BrO}_3$   $[\text{M-H}]^-$ : 340.9808; Found: 340.9815.

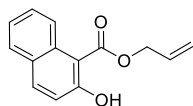

**Allyl 2-hydroxy-1-naphthoate (21a).**<sup>3</sup> Colorless oil. <sup>1</sup>H NMR (400 MHz, CDCl<sub>3</sub>) δ 12.26 (s, 1H), 8.75 (d, *J* = 8.8 Hz, 1H), 7.81 (d, *J* = 9.1 Hz, 1H), 7.71 – 7.64 (m, 1H), 7.56 – 7.48 (m, 1H), 7.35 – 7.29 (m, 1H), 7.13 (d, *J* = 1.0 Hz, 1H), 6.17 – 6.05 (m, 1H), 5.51 – 5.41 (m, 1H), 5.38 – 5.31 (m, 1H), 4.98 – 4.93 (m, 2H). <sup>13</sup>C NMR (100 MHz, CDCl<sub>3</sub>) δ 171.9, 164.4, 136.8, 131.7, 131.5, 129.0, 128.5, 128.4, 125.2, 123.5, 119.2, 119.2, 104.4, 66.3. HRMS (ESI): Calculated for C<sub>14</sub>H<sub>11</sub>O<sub>3</sub> [M-H]<sup>-</sup>: 227.0703; Found: 227.0707.

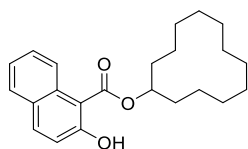

**Cyclododecyl 2-hydroxy-1-naphthoate (22a).** Colorless solid. Mp = 155.0 – 155.7 °C. <sup>1</sup>H NMR (400 MHz, CDCl<sub>3</sub>) δ 12.38 (s, 1H), 8.71 (d, *J* = 9.0 Hz, 1H), 7.74 (d, *J* = 8.9 Hz, 1H), 7.61 (d, *J* = 8.1 Hz, 1H), 7.44 (t, *J* = 7.9 Hz, 1H), 7.23 (t, *J* = 7.5 Hz, 1H), 7.05 (d, *J* = 9.1 Hz, 1H), 5.42 – 5.32 (m, 1H), 1.88 – 1.80 (m, 2H), 1.67 (dd, *J* = 13.9, *J* = 5.6 Hz, 2H), 1.42 – 1.37 (m, 6H), 1.34 – 1.24 (m, 12H). <sup>13</sup>C NMR (100 MHz, CDCl<sub>3</sub>) δ 172.0, 164.3, 136.5, 132.0, 129.0, 128.6, 128.2, 125.2, 123.4, 119.3, 105.0, 74.8, 29.0, 24.2, 24.0, 23.2, 23.0, 20.8. HRMS (ESI): Calculated for C<sub>23</sub>H<sub>29</sub>O<sub>3</sub> [M-H]<sup>-</sup>: 353.2111; Found: 353.2109.

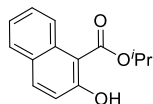

**Isopropyl 2-hydroxy-1-naphthoate (23a).**<sup>1</sup> Colorless solid. Mp = 69.6 – 70.2 °C. <sup>1</sup>H NMR (400 MHz, CDCl<sub>3</sub>) δ 12.33 (s, 1H), 8.73 (d, *J* = 8.9 Hz, 1H), 7.80 (d, *J* = 8.9 Hz, 1H), 7.70 – 7.63 (m, 1H), 7.51 – 7.43 (m, 1H), 7.31 – 7.25 (m, 1H), 7.08 (d, *J* = 8.9 Hz, 1H), 5.46 – 5.34 (m, 1H), 1.44 (d, *J* = 6.3 Hz, 6H). <sup>13</sup>C NMR (100 MHz, CDCl<sub>3</sub>) δ 171.9, 164.3, 136.6, 131.9, 129.0, 128.6, 128.3, 125.2, 123.5, 119.3, 105.0,

70.0, 22.1. HRMS (ESI): Calculated for C<sub>14</sub>H<sub>13</sub>O<sub>3</sub> [M-H]<sup>-</sup>: 229.0859; Found: 229.0859.

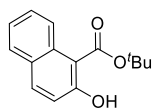

**Tert-butyl 2-hydroxy-1-naphthoate (24a).**<sup>1</sup> Colorless oil. <sup>1</sup>H NMR (400 MHz, CDCl<sub>3</sub>) δ 12.39 (s, 1H), 8.71 (d, *J* = 8.8 Hz, 1H), 7.77 (d, *J* = 9.0 Hz, 1H), 7.69 – 7.63 (m, 1H), 7.49 – 7.42 (m, 1H), 7.29 – 7.22 (m, 1H), 7.07 (d, *J* = 9.0 Hz, 1H), 1.65 (s, 9H). <sup>13</sup>C NMR (100 MHz, CDCl<sub>3</sub>) δ 171.7, 164.2, 136.2, 132.0, 129.0, 128.6, 128.1, 125.2, 123.4, 119.4, 105.9, 84.1, 28.5. HRMS (ESI): Calculated for C<sub>15</sub>H<sub>15</sub>O<sub>3</sub> [M-H]<sup>-</sup>: 243.1016; Found: 243.1028.

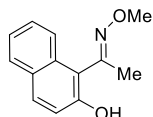

**(2-Hydroxynaphthalen-1-yl)ethan-1-one O-methyl oxime (25a).**<sup>4</sup> Colorless oil. <sup>1</sup>H NMR (400 MHz, CDCl<sub>3</sub>) δ 9.02 (s, 1H), 7.69 – 7.56 (m, 3H), 7.38 – 7.30 (m, 1H), 7.26 – 7.20 (m, 1H), 7.10 (d, *J* = 8.9 Hz, 1H), 3.97 (s, 3H), 2.29 (s, 3H). <sup>13</sup>C NMR (100 MHz, CDCl<sub>3</sub>) δ 156.9, 152.7, 131.7, 131.2, 129.1, 128.7, 126.6, 124.3, 123.3, 118.3, 114.4, 62.3, 17.9. HRMS (ESI): Calculated for C<sub>13</sub>H<sub>12</sub>NO<sub>2</sub> [M-H]<sup>-</sup>: 214.0863; Found: 214.0880.

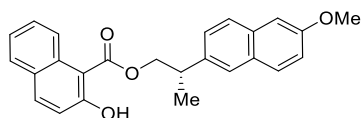

**(S)-2-(6-Methoxynaphthalen-2-yl)propyl 2-hydroxy-1-naphthoate (26a).** Colorless solid. Mp = 119.5 – 120.5 °C. <sup>1</sup>H NMR (400 MHz, CDCl<sub>3</sub>) δ 12.14 (s, 1H), 8.16 (d, *J* = 8.8 Hz, 1H), 7.66 – 7.57 (m, 4H), 7.49 (dd, *J* = 8.1, *J* = 1.6 Hz, 1H), 7.30 (dd, *J* = 8.5, *J* = 1.9 Hz, 1H), 7.11 – 7.03 (m, 2H), 7.00 – 6.95 (m, 2H), 6.94 – 6.89 (m, 1H), 4.58 – 4.50 (m, 2H), 3.76 (s, 3H), 3.33 (q, *J* = 7.1 Hz, 1H), 1.36 (d, *J* = 7.1 Hz, 3H). <sup>13</sup>C NMR (100 MHz, CDCl<sub>3</sub>) δ 172.3, 164.2, 157.5, 138.1, 136.7, 133.6,

131.6, 129.1, 129.0, 128.8, 128.4, 128.1, 127.3, 125.9, 125.8, 125.3, 123.4, 119.1, 118.9, 105.5, 104.6, 71.0, 55.2, 38.8, 18.3. HRMS (ESI): Calculated for C<sub>25</sub>H<sub>21</sub>O<sub>4</sub> [M-H]<sup>-</sup>: 385.1434; Found 385.1433.

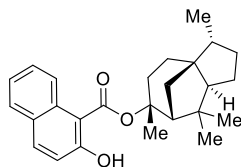

**(3R,3aS,6R,7R,8aS)-3,6,8,8-tetramethyloctahydro-1H-3a,7-methanoazulen-6-yl 2-hydroxy-1-naphthoate (27a).** Colorless oil. <sup>1</sup>H NMR (400 MHz, CDCl<sub>3</sub>) δ 12.65 (s, 1H), 8.87 – 8.78 (m, 1H), 7.78 (d, *J* = 9.0 Hz, 1H), 7.66 (dd, *J* = 8.1, *J* = 1.5 Hz, 1H), 7.48 – 7.38 (m, 1H), 7.31 – 7.25 (m, 1H), 7.08 (d, *J* = 9.0 Hz, 1H), 2.78 (d, *J* = 5.2 Hz, 1H), 2.32 – 2.18 (m, 2H), 1.85 – 1.78 (m, 2H), 1.74 (d, *J* = 0.9 Hz, 3H), 1.70 – 1.62 (m, 2H), 1.54 – 1.43 (m, 4H), 1.41 – 1.37 (m, 1H), 1.36 – 1.29 (m, 1H), 1.26 – 1.18 (m, 1H), 0.97 (s, 3H), 0.92 (s, 3H), 0.80 (d, *J* = 7.0 Hz, 3H). <sup>13</sup>C NMR (100 MHz, CDCl<sub>3</sub>) δ 171.9, 164.4, 136.3, 129.0, 128.7, 128.0, 125.4, 123.3, 119.5, 105.9, 90.7, 56.8, 54.0, 43.5, 41.2, 41.2, 36.9, 33.9, 31.3, 31.2, 28.5, 26.8, 26.7, 25.3, 15.5. HRMS (ESI): Calculated for C<sub>26</sub>H<sub>31</sub>O<sub>3</sub> [M-H]<sup>-</sup>: 391.2268; Found: 391.2267.

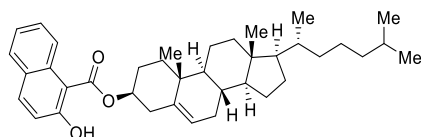

**(3S, 8S, 9S, 10R, 13R, 14S, 17R)-10, 13-Dimethyl-17-((R)-6-methylheptan-2-yl)-2, 3,4,7,8,9,10,11,12,13,14,15,16,17-tetradecahydro-1H-cyclopenta[*a*]phenanthren-3-yl 2-hydroxy-1-naphthoate (28a).** Colorless solid. Mp = 206.8 – 207.9 °C. <sup>1</sup>H NMR (400 MHz, CDCl<sub>3</sub>) δ 12.33 (s, 1H), 8.69 (d, *J* = 8.8 Hz, 1H), 7.69 (d, *J* = 9.0 Hz, 1H), 7.57 (d, *J* = 8.0 Hz, 1H), 7.42 (t, *J* = 7.8 Hz, 1H), 7.21 (t, *J* = 7.4 Hz, 1H), 7.01 (d, *J* = 9.0 Hz, 1H), 5.32 (d, *J* = 4.8 Hz, 1H), 4.99 – 4.85 (m, 1H), 2.49 (d, *J* = 8.1 Hz, 2H), 2.02 (d, *J* = 10.0 Hz, 1H), 1.92 – 1.71 (m, 5H), 1.43 – 1.32 (m, 5H), 1.28 – 1.21 (m, 3H), 1.17 – 1.12 (m, 2H), 1.07 – 1.01 (m, 4H), 0.96 (s, 4H), 0.83 –

0.80 (m, 4H), 0.79 – 0.75 (m, 10H), 0.56 (s, 3H).  $^{13}\text{C}$  NMR (100 MHz,  $\text{CDCl}_3$ )  $\delta$  171.7, 164.5, 139.2, 136.5, 131.9, 129.0, 128.6, 128.3, 125.3, 123.4, 123.2, 119.3, 104.8, 76.2, 56.6, 56.1, 50.0, 42.2, 39.6, 39.5, 38.3, 37.0, 36.6, 36.2, 35.8, 31.8, 31.7, 28.0, 26.9, 24.2, 23.9, 22.8, 22.6, 21.0, 19.3, 18.7, 14.1, 11.8. HRMS (ESI): Calculated for  $\text{C}_{38}\text{H}_{51}\text{O}_3$   $[\text{M}-\text{H}]^-$ : 555.3833; Found: 555.3835.

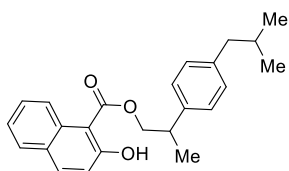

**2-(4-Isobutylphenyl)propyl 2-hydroxy-1-naphthoate (29a).** Colorless solid. Mp = 54.7 – 55.2 °C.  $^1\text{H}$  NMR (400 MHz,  $\text{CDCl}_3$ )  $\delta$  12.24 (s, 1H), 8.34 (d,  $J$  = 8.7 Hz, 1H), 7.71 (d,  $J$  = 9.0 Hz, 1H), 7.58 (d,  $J$  = 8.0 Hz, 1H), 7.30 – 7.20 (m, 2H), 7.17 (d,  $J$  = 7.8 Hz, 2H), 7.10 – 7.03 (m, 3H), 4.55 – 4.47 (m, 2H), 3.23 (q,  $J$  = 7.1 Hz, 1H), 2.41 (d,  $J$  = 7.3 Hz, 2H), 1.84 – 1.76 (m, 1H), 1.34 (d,  $J$  = 6.9 Hz, 3H), 0.85 (s, 3H), 0.83 (s, 3H).  $^{13}\text{C}$  NMR (100 MHz,  $\text{CDCl}_3$ )  $\delta$  172.2, 164.3, 140.2, 140.1, 136.6, 131.7, 129.3, 128.8, 128.4, 128.1, 126.9, 125.4, 123.4, 119.1, 104.6, 71.1, 45.0, 38.5, 30.1, 22.3, 18.3. HRMS (ESI): Calculated for  $\text{C}_{24}\text{H}_{25}\text{O}_3$   $[\text{M}-\text{H}]^-$ : 361.1798; Found: 361.1803.

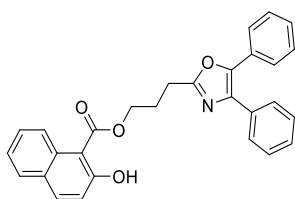

**3-(4,5-Diphenyloxazol-2-yl)propyl 2-hydroxy-1-naphthoate (30a).** Colorless solid. Mp = 106.4 – 107.2 °C.  $^1\text{H}$  NMR (400 MHz,  $\text{CDCl}_3$ )  $\delta$  12.23 (s, 1H), 8.64 (d,  $J$  = 8.8 Hz, 1H), 7.72 (d,  $J$  = 8.9 Hz, 1H), 7.59 (d,  $J$  = 7.9 Hz, 1H), 7.51 – 7.48 (m, 2H), 7.44 – 7.40 (m, 3H), 7.25 – 7.17 (m, 7H), 7.02 (d,  $J$  = 9.1 Hz, 1H), 4.56 (t,  $J$  = 6.3 Hz, 2H), 2.97 (t,  $J$  = 7.4 Hz, 2H), 2.39 – 2.33 (m, 2H).  $^{13}\text{C}$  NMR (100 MHz,  $\text{CDCl}_3$ )  $\delta$  172.3, 164.5, 162.0, 145.3, 136.8, 135.0, 132.3, 131.7, 129.0, 128.8, 128.5, 128.5,

128.4, 128.3, 128.0, 127.8, 126.3, 125.0, 123.5, 119.2, 118.9, 104.5, 64.8, 25.9, 25.0.

HRMS (ESI): Calculated for C<sub>29</sub>H<sub>22</sub>NO<sub>4</sub> [M-H]<sup>-</sup>: 448.1543; Found: 448.1541.

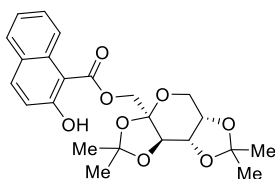

**((3aR,5aS,8aS,8bR)-2,2,7,7-Tetramethyltetrahydro-3aH-bis(1,3-dioxolo)[4,5-b:4',5'-d]pyran-3a-yl)methyl 2-hydroxy-1-naphthoate (31a).** Colorless oil. <sup>1</sup>H NMR (400 MHz, CDCl<sub>3</sub>) δ 11.64 (s, 1H), 8.67 (dd, *J* = 8.7, 1.1 Hz, 1H), 7.70 (d, *J* = 9.0 Hz, 1H), 7.56 (dd, *J* = 8.0, *J* = 1.5 Hz, 1H), 7.46 – 7.39 (m, 1H), 7.26 – 7.17 (m, 1H), 7.01 (d, *J* = 9.0 Hz, 1H), 4.81 (d, *J* = 11.7 Hz, 1H), 4.50 (dd, *J* = 7.9, *J* = 2.7 Hz, 1H), 4.43 (d, *J* = 11.7 Hz, 1H), 4.27 (d, *J* = 2.7 Hz, 1H), 4.10 (dd, *J* = 7.9, *J* = 1.6 Hz, 1H), 3.82 (dd, *J* = 13.0, *J* = 1.9 Hz, 1H), 3.69 (dd, *J* = 13.0, *J* = 0.8 Hz, 1H), 1.38 (s, 3H), 1.33 (s, 3H), 1.21 (s, 3H), 1.04 (s, 3H). <sup>13</sup>C NMR (100 MHz, CDCl<sub>3</sub>) δ 170.8, 163.5, 136.6, 131.5, 128.7, 128.4, 128.3, 125.3, 123.5, 119.0, 108.9, 108.9, 104.8, 101.1, 70.8, 70.5, 69.8, 65.6, 61.3, 26.3, 25.6, 24.9, 23.8. HRMS (ESI): Calculated for C<sub>23</sub>H<sub>25</sub>O<sub>8</sub> [M-H]<sup>-</sup>: 429.1544; Found: 429.1546.

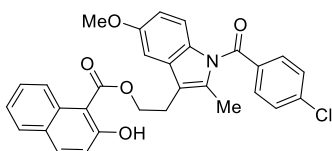

**2-(1-(4-Chlorobenzoyl)-5-methoxy-2-methyl-1H-indol-3-yl)ethyl**

**2-hydroxy-1-naphthoate (32a).** Colorless solid. Mp = 159.2 – 160.1 °C. <sup>1</sup>H NMR (400 MHz, CDCl<sub>3</sub>) δ 12.13 (s, 1H), 8.49 (d, *J* = 8.6 Hz, 1H), 7.75 (d, *J* = 9.0 Hz, 1H), 7.62 (d, *J* = 8.0 Hz, 1H), 7.46 (d, *J* = 8.2 Hz, 2H), 7.32 (d, *J* = 7.6 Hz, 1H), 7.26 – 7.22 (m, 3H), 7.05 – 7.01 (m, 1H), 6.92 (d, *J* = 2.6 Hz, 1H), 6.84 (d, *J* = 9.0 Hz, 1H), 6.61 – 6.56 (m, 1H), 4.65 (t, *J* = 7.1 Hz, 2H), 3.68 (s, 3H), 3.14 (t, *J* = 7.0 Hz, 2H), 2.22 (s, 3H). <sup>13</sup>C NMR (100 MHz, CDCl<sub>3</sub>) δ 172.3, 168.2, 164.3, 156.0, 139.0, 136.9, 135.4, 133.8, 131.6, 131.0, 130.9, 130.5, 129.0, 128.9, 128.5, 128.4, 125.1, 123.6,



119.2, 115.1, 114.9, 111.5, 104.5, 101.0, 64.4, 55.6, 23.7, 13.3. HRMS (ESI):  
Calculated for  $C_{30}H_{23}ClNO_5$   $[M-H]^-$ : 512.1259; Found: 512.1257.

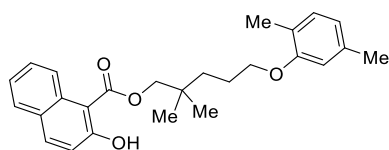

**5-(2,5-Dimethylphenoxy)-2,2-dimethylpentyl 2-hydroxy-1-naphthoate (33a).**

Colorless oil.  $^1H$  NMR (400 MHz,  $CDCl_3$ )  $\delta$  12.32 (s, 1H), 8.75 (d,  $J = 8.8$  Hz, 1H), 7.81 (d,  $J = 9.0$  Hz, 1H), 7.68 (d,  $J = 8.0$  Hz, 1H), 7.50 – 7.39 (m, 1H), 7.32 – 7.23 (m, 1H), 7.13 – 7.05 (m, 1H), 6.89 (d,  $J = 7.4$  Hz, 1H), 6.56 (d,  $J = 7.5$  Hz, 1H), 6.51 (s, 1H), 4.23 (s, 2H), 3.85 (t,  $J = 6.2$  Hz, 2H), 2.20 (s, 3H), 2.01 (s, 3H), 1.81 – 1.73 (m, 2H), 1.58 – 1.52 (m, 2H), 1.07 (s, 6H).  $^{13}C$  NMR (100 MHz,  $CDCl_3$ )  $\delta$  172.7, 164.5, 156.9, 136.8, 136.4, 131.8, 130.2, 129.1, 128.6, 128.3, 125.2, 123.6, 123.5, 120.6, 119.4, 111.9, 104.8, 74.0, 68.1, 35.7, 34.9, 33.8, 24.7, 24.1, 21.4, 15.7. HRMS (ESI): Calculated for  $C_{26}H_{29}O_4$   $[M-H]^-$ : 405.2060; Found: 405.2070.

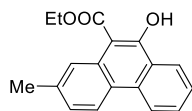

**Ethyl 10-hydroxy-7-methylphenanthrene-9-carboxylate (34a).**<sup>2</sup> Colorless solid.

Mp = 131.6 – 133.2 °C.  $^1H$  NMR (400 MHz,  $CDCl_3$ )  $\delta$  13.25 (s, 1H), 8.55 (s, 1H), 8.48 (t,  $J = 8.3$  Hz, 2H), 8.39 (d,  $J = 8.4$  Hz, 1H), 7.71 – 7.66 (m, 1H), 7.60 – 7.53 (m, 1H), 7.28 – 7.23 (m, 1H), 4.56 (q,  $J = 7.1$  Hz, 2H), 2.50 (s, 3H), 1.52 (t,  $J = 7.1$  Hz, 3H).  $^{13}C$  NMR (100 MHz,  $CDCl_3$ )  $\delta$  172.8, 162.7, 137.2, 133.6, 130.3, 129.4, 126.3, 125.9, 125.6, 124.8, 124.8, 123.8, 122.6, 122.1, 101.3, 61.9, 22.1, 14.2. HRMS (ESI): Calculated for  $C_{18}H_{15}O_3$   $[M-H]^-$ : 279.1016; Found: 279.1020.

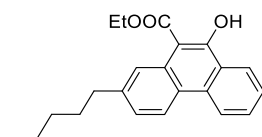

**Ethyl 10-hydroxy-7-pentylphenanthrene-9-carboxylate (35a).**<sup>6</sup> Colorless solid.

Mp = 75.1 – 76.2 °C.  $^1H$  NMR (400 MHz,  $CDCl_3$ )  $\delta$  13.17 (s, 1H), 8.52 (d,  $J = 1.8$

Hz, 1H), 8.42 (dd,  $J = 8.2, J = 1.5$  Hz, 2H), 8.36 (d,  $J = 8.4$  Hz, 1H), 7.65 – 7.60 (m, 1H), 7.51 – 7.47 (m, 1H), 7.21 (dd,  $J = 8.4, J = 1.8$  Hz, 1H), 4.52 – 4.45 (m, 2H), 2.68 (t,  $J = 7.7$  Hz, 2H), 1.68 – 1.60 (m, 2H), 1.48 – 1.44 (m, 3H), 1.31 – 1.27 (m, 4H), 0.84 – 0.81 (m, 3H).  $^{13}\text{C}$  NMR (100 MHz,  $\text{CDCl}_3$ )  $\delta$  172.9, 162.7, 142.1, 133.7, 130.3, 129.4, 126.3, 125.3, 125.1, 124.9, 124.8, 124.05, 122.7, 122.2, 101.4, 61.9, 36.4, 31.5, 31.0, 22.6, 14.2, 14.0. HRMS (ESI): Calculated for  $\text{C}_{22}\text{H}_{23}\text{O}_3$   $[\text{M}-\text{H}]^-$ : 335.1642; Found: 335.1642.

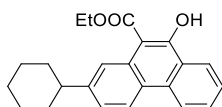

**Ethyl 7-cyclohexyl-10-hydroxyphenanthrene-9-carboxylate (36a).**<sup>6</sup> Colorless solid. Mp = 156.6 – 158.2 °C.  $^1\text{H}$  NMR (400 MHz,  $\text{CDCl}_3$ )  $\delta$  13.19 (s, 1H), 8.57 (d,  $J = 1.8$  Hz, 1H), 8.46 – 8.38 (m, 2H), 8.36 (d,  $J = 8.5$  Hz, 1H), 7.64 – 7.58 (m, 1H), 7.52 – 7.44 (m, 1H), 7.24 (dd,  $J = 8.5, J = 1.8$  Hz, 1H), 4.49 (q,  $J = 7.2$  Hz, 2H), 2.61 – 2.51 (m, 1H), 1.96 – 1.86 (m, 2H), 1.84 – 1.76 (m, 2H), 1.76 – 1.66 (m, 1H), 1.50 – 1.45 (m, 4H), 1.43 – 1.38 (m, 2H), 1.37 – 1.31 (m, 1H), 1.25 – 1.15 (m, 1H).  $^{13}\text{C}$  NMR (100 MHz,  $\text{CDCl}_3$ )  $\delta$  173.0, 162.7, 147.2, 133.7, 130.3, 129.5, 126.3, 124.9, 124.8, 124.2, 123.8, 123.6, 122.7, 122.2, 101.5, 61.9, 44.9, 34.6, 26.9, 26.3, 14.3. HRMS (ESI): Calculated for  $\text{C}_{23}\text{H}_{23}\text{O}_3$   $[\text{M}-\text{H}]^-$ : 347.1642; Found: 347.1643.

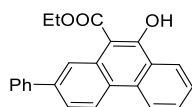

**Ethyl 10-hydroxy-7-phenylphenanthrene-9-carboxylate (37a).**<sup>7</sup> Colorless solid. Mp = 204.4 – 205.2 °C.  $^1\text{H}$  NMR (400 MHz,  $\text{CDCl}_3$ )  $\delta$  13.31 (s, 1H), 8.98 (d,  $J = 1.9$  Hz, 1H), 8.48 – 8.41 (m, 3H), 7.66 – 7.59 (m, 4H), 7.54 – 7.49 (m, 1H), 7.43 – 7.37 (m, 2H), 7.33 – 7.27 (m, 1H), 4.49 (q,  $J = 7.1$  Hz, 2H), 1.47 (t,  $J = 7.2$  Hz, 3H).  $^{13}\text{C}$  NMR (100 MHz,  $\text{CDCl}_3$ )  $\delta$  172.9, 163.2, 141.4, 139.8, 133.4, 130.5, 129.7, 128.8, 127.3, 127.2, 126.8, 125.2, 125.1, 125.0, 124.5, 123.3, 123.1, 122.4, 101.4, 62.0, 14.3. HRMS (ESI): Calculated for  $\text{C}_{23}\text{H}_{17}\text{O}_3$   $[\text{M}-\text{H}]^-$ : 341.1172; Found: 341.1172.

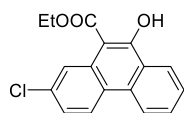

**Ethyl 7-chloro-10-hydroxyphenanthrene-9-carboxylate (38a).**<sup>6</sup> Colorless solid. Mp = 150.9 – 151.7 °C. <sup>1</sup>H NMR (400 MHz, CDCl<sub>3</sub>) δ 13.43 (s, 1H), 8.76 – 8.66 (m, 1H), 8.44 (d, *J* = 8.3 Hz, 1H), 8.35 (d, *J* = 8.3 Hz, 1H), 8.31 (d, *J* = 8.9 Hz, 1H), 7.72 – 7.66 (m, 1H), 7.60 – 7.55 (m, 1H), 7.36 – 7.29 (m, 1H), 4.56 (q, *J* = 7.1, 6.7 Hz, 2H), 1.55 (t, *J* = 7.1 Hz, 3H). <sup>13</sup>C NMR (100 MHz, CDCl<sub>3</sub>) δ 172.4, 163.6, 133.6, 132.9, 130.6, 130.4, 126.9, 125.4, 125.4, 125.0, 124.3, 124.2, 124.0, 122.2, 100.4, 62.3, 14.2. HRMS (ESI): Calculated for C<sub>17</sub>H<sub>12</sub>ClO<sub>3</sub> [M-H]<sup>-</sup>: 299.0469; Found: 299.0470.

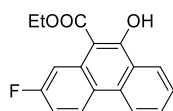

**Ethyl 7-fluoro-10-hydroxyphenanthrene-9-carboxylate (39a).**<sup>6</sup> Colorless solid. Mp = 152.1 – 152.8 °C. <sup>1</sup>H NMR (400 MHz, CDCl<sub>3</sub>) δ 13.41 (s, 1H), 8.37 – 8.25 (m, 4H), 7.63 – 7.56 (m, 1H), 7.48 – 7.44 (m, 1H), 7.07 – 7.01 (m, 1H), 4.47 (q, *J* = 7.2 Hz, 2H), 1.45 (t, *J* = 7.1 Hz, 3H). <sup>13</sup>C NMR (100 MHz, CDCl<sub>3</sub>) δ 172.6, 163.9, 162.1 (d, *J* = 244.0 Hz), 133.2, 131.0 (d, *J* = 13.0 Hz), 130.6, 126.5, 125.0, 124.7 (d, *J* = 9.6 Hz), 124.6, 122.4, 122.1, 112.4 (d, *J* = 23.5 Hz), 111.4 (d, *J* = 25.6 Hz), 100.8 (d, *J* = 2.0 Hz), 62.2, 14.2. <sup>19</sup>F NMR (376 MHz, CDCl<sub>3</sub>) δ -113.2. HRMS (ESI): Calculated for C<sub>17</sub>H<sub>12</sub>FO<sub>3</sub> [M-H]<sup>-</sup>: 283.0765; Found: 283.0783.

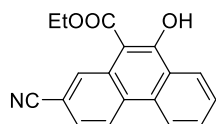

**Ethyl 7-cyano-10-hydroxyphenanthrene-9-carboxylate (40a).**<sup>6</sup> Colorless solid. Mp = 232.6 – 233.4 °C. <sup>1</sup>H NMR (400 MHz, CDCl<sub>3</sub>) δ 13.48 (s, 1H), 8.99 (s, 1H), 8.46 – 8.35 (m, 3H), 7.71 (t, *J* = 7.6 Hz, 1H), 7.62 (t, *J* = 7.6 Hz, 1H), 7.51 (d, *J* = 8.5 Hz, 1H), 4.54 (q, *J* = 7.2 Hz, 2H), 1.49 (t, *J* = 7.2 Hz, 3H). <sup>13</sup>C NMR (100 MHz,

CDCl<sub>3</sub>)  $\delta$  172.2, 164.1, 132.3, 131.1, 131.0, 129.3, 128.6, 128.5, 126.2, 125.8, 125.3, 123.7, 122.9, 119.7, 110.9, 100.5, 62.7, 14.3. HRMS (ESI) Calculated for C<sub>18</sub>H<sub>12</sub>NO<sub>3</sub> [M-H]<sup>-</sup>: 290.0812; Found: 290.0819.

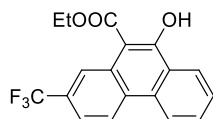

**Ethyl 10-hydroxy-7-(trifluoromethyl)phenanthrene-9-carboxylate (41a).**<sup>6</sup>

Colorless solid. Mp = 183.0 – 184.8 °C. <sup>1</sup>H NMR (400 MHz, CDCl<sub>3</sub>)  $\delta$  13.41 (s, 1H), 9.06 (s, 1H), 8.49 – 8.41 (m, 3H), 7.73 – 7.66 (m, 1H), 7.62 – 7.52 (m, 2H), 4.51 (q, *J* = 7.1 Hz, 2H), 1.49 (t, *J* = 7.1 Hz, 3H). <sup>13</sup>C NMR (100 MHz, CDCl<sub>3</sub>)  $\delta$  172.3, 163.6, 132.4, 130.7, 129.1, 128.8, 128.8 (d, *J* = 32.0 Hz), 127.8, 127.7, 125.9, 125.7, 125.0 (q, *J* = 261.3 Hz), 123.2, 122.5, 119.9 (q, *J* = 4.0 Hz), 100.8, 62.3, 13.9. <sup>19</sup>F NMR (376 MHz, CDCl<sub>3</sub>)  $\delta$  -62.3. HRMS (ESI): Calculated for C<sub>18</sub>H<sub>12</sub>F<sub>3</sub>O<sub>3</sub> [M-H]<sup>-</sup>: 333.0733; Found: 333.0754.

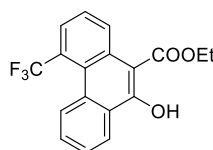

**Ethyl 10-hydroxy-5-(trifluoromethyl)phenanthrene-9-carboxylate (42a).**

Colorless solid. Mp = 105.6 – 106.3 °C. <sup>1</sup>H NMR (400 MHz, CDCl<sub>3</sub>)  $\delta$  13.09 (s, 1H), 8.74 (d, *J* = 8.3 Hz, 1H), 8.44 (dd, *J* = 7.4, 2.5 Hz, 2H), 7.77 (d, *J* = 7.6 Hz, 1H), 7.58 (m, 2H), 7.41 (t, *J* = 8.1 Hz, 1H), 4.46 (q, *J* = 7.2 Hz, 2H), 1.42 (t, *J* = 7.1 Hz, 3H). <sup>13</sup>C NMR (100 MHz, CDCl<sub>3</sub>)  $\delta$  172.0, 162.4, 131.4, 131.1, 129.1, 129.0, 128.3 (q, *J* = 7.8 Hz), 126.9, 126.1, 126.0 (d, *J* = 30.5 Hz), 125.7 (d, *J* = 366.0 Hz), 125.7, 124.9 (q, *J* = 6.9 Hz), 124.5 (q, *J* = 1.5 Hz), 124.2, 101.3, 62.2, 14.1. <sup>19</sup>F NMR (376 MHz, CDCl<sub>3</sub>)  $\delta$  -52.9. HRMS (ESI) Calculated for C<sub>18</sub>H<sub>12</sub>F<sub>3</sub>O<sub>3</sub> [M-H]<sup>-</sup>: 333.0733; Found: 333.0739.

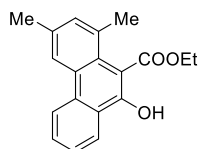

**Ethyl 10-hydroxy-6,8-dimethylphenanthrene-9-carboxylate (43a).**<sup>2</sup> Colorless solid. Mp = 141.5 – 142.9 °C. <sup>1</sup>H NMR (400 MHz, CDCl<sub>3</sub>) δ 10.72 (s, 1H), 8.45 (d, *J* = 8.3 Hz, 1H), 8.33 (d, *J* = 8.1 Hz, 1H), 8.10 (s, 1H), 7.61 (t, *J* = 7.0 Hz, 1H), 7.50 (t, 1H), 7.14 (s, 1H), 4.34 (q, *J* = 7.1 Hz, 2H), 2.42 (s, 3H), 2.38 (s, 3H), 1.26 (t, *J* = 7.2 Hz, 3H). <sup>13</sup>C NMR (100 MHz, CDCl<sub>3</sub>) δ 171.7, 157.6, 133.9, 133.5, 132.0, 129.8, 127.2, 126.7, 126.5, 124.6, 124.4, 122.7, 120.3, 103.6, 61.7, 22.8, 21.4, 14.1. HRMS (ESI): Calculated for C<sub>19</sub>H<sub>17</sub>O<sub>3</sub> [M-H]<sup>-</sup>: 293.1172; Found: 293.1172.

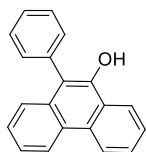

**10-Phenylphenanthren-9-ol (44a).**<sup>8</sup> Pink solid. Mp = 182.2 – 183.2 °C. <sup>1</sup>H NMR (400 MHz, CDCl<sub>3</sub>) δ 8.63 – 8.55 (m, 2H), 8.30 (d, *J* = 8.0 Hz, 1H), 7.63 – 7.54 (m, 2H), 7.51 (t, *J* = 7.4 Hz, 2H), 7.43 (t, *J* = 6.8 Hz, 1H), 7.38 (t, *J* = 6.2 Hz, 3H), 7.34 – 7.28 (m, 2H), 5.37 (s, 1H). <sup>13</sup>C NMR (100 MHz, CDCl<sub>3</sub>) δ 146.0, 134.4, 132.4, 131.4, 131.0, 129.8, 128.6, 127.2, 126.8, 126.6, 126.3, 125.3, 124.9, 124.0, 123.0, 122.6, 122.5, 117.2. HRMS (ESI): Calculated for C<sub>20</sub>H<sub>13</sub>O [M-H]<sup>-</sup>: 269.0961; Found: 269.0970.

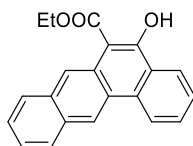

**Ethyl 5-hydroxytetraphene-6-carboxylate (45a).**<sup>2</sup> Colorless solid. Mp = 153.4 – 154.8 °C. <sup>1</sup>H NMR (400 MHz, CDCl<sub>3</sub>) δ 11.10 (s, 1H), 8.56 – 8.50 (m, 2H), 8.42 (d, *J* = 8.9 Hz, 1H), 7.96 (d, *J* = 8.3 Hz, 1H), 7.89 – 7.85 (m, 1H), 7.80 (d, *J* = 8.9 Hz, 1H), 7.74 – 7.70 (m, 1H), 7.64 – 7.59 (m, 1H), 7.52 – 7.47 (m, 1H), 7.46 – 7.41 (m, 1H), 4.31 (q, 2H), 1.10 (t, *J* = 7.2 Hz, 3H). <sup>13</sup>C NMR (100 MHz, CDCl<sub>3</sub>) δ 172.4,

158.5, 133.1, 132.9, 130.0, 129.4, 128.9, 127.7, 126.7, 126.6, 126.0, 125.8, 124.6, 124.6, 124.2, 123.9, 122.9, 120.1, 103.7, 61.6, 13.7. HRMS (ESI): Calculated for  $C_{21}H_{15}O_3$  [M-H]<sup>-</sup>: 315.1016; Found: 315.1021.

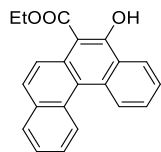

**Ethyl 5-hydroxybenzo[c]phenanthrene-6-carboxylate (46a).**<sup>2</sup> Colorless solid. Mp = 124.9 – 125.7 °C. <sup>1</sup>H NMR (400 MHz, CDCl<sub>3</sub>) δ 12.99 (s, 1H), 8.66 – 8.60 (m, 2H), 8.54 – 8.48 (m, 2H), 7.79 – 7.75 (m, 1H), 7.63 (d, *J* = 9.1 Hz, 1H), 7.55 – 7.50 (m, 1H), 7.50 – 7.44 (m, 1H), 7.43 – 7.38 (m, 2H), 4.41 (q, *J* = 7.1 Hz, 2H), 1.38 (t, *J* = 7.2 Hz, 3H). <sup>13</sup>C NMR (100 MHz, CDCl<sub>3</sub>) δ 172.4, 161.6, 132.9, 131.5, 129.6, 129.0, 128.2, 128.0, 127.6, 127.6, 127.2, 125.8, 125.6, 125.4, 125.0, 124.2, 123.7, 122.3, 102.2, 61.9, 14.1. HRMS (ESI): Calculated for  $C_{21}H_{15}O_3$  [M-H]<sup>-</sup>: 315.1016; Found: 315.1026.

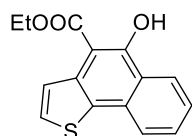

**Ethyl 5-hydroxynaphtho[1,2-b]thiophene-4-carboxylate (47a).**<sup>6</sup> Colorless solid. Mp = 104.6 – 106.1 °C. <sup>1</sup>H NMR (400 MHz, CDCl<sub>3</sub>) δ 12.70 (s, 1H), 8.19 (d, *J* = 8.3 Hz, 1H), 7.68 (d, *J* = 8.2 Hz, 1H), 7.63 (d, *J* = 5.4 Hz, 1H), 7.41 – 7.34 (m, 1H), 7.30 – 7.22 (m, 1H), 7.17 (d, *J* = 5.5 Hz, 1H), 4.26 (q, *J* = 6.7 Hz, 2H), 1.29 (t, *J* = 7.2 Hz, 3H). <sup>13</sup>C NMR (100 MHz, CDCl<sub>3</sub>) δ 171.6, 161.5, 133.3, 131.3, 129.9, 129.9, 126.2, 125.2, 125.0, 124.9, 123.0, 123.0, 101.3, 61.6, 14.1. HRMS (ESI): Calculated for  $C_{15}H_{11}O_3S$  [M-H]<sup>-</sup>: 271.0423; Found: 271.0423.

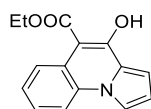

**Ethyl 4-hydroxypyrrolo[1,2-a]quinoline-5-carboxylate (48a).**<sup>2</sup> Colorless solid. Mp = 123.2 – 124.6 °C. <sup>1</sup>H NMR (400 MHz, CDCl<sub>3</sub>) δ 13.32 (s, 1H), 8.49 – 8.41 (m,

1H), 7.70 – 7.66 (m, 1H), 7.60 – 7.54 (m, 1H), 7.17 – 7.11 (m, 2H), 6.97 – 6.92 (m, 1H), 6.65 – 6.61 (m, 1H), 4.38 (q,  $J = 7.1$  Hz, 2H), 1.38 (t,  $J = 7.1$  Hz, 3H).  $^{13}\text{C}$  NMR (100 MHz,  $\text{CDCl}_3$ )  $\delta$  172.2, 159.5, 129.1, 126.6, 124.9, 124.5, 124.3, 121.1, 116.0, 114.0, 113.4, 107.3, 94.0, 61.6, 14.2. HRMS (ESI): Calculated for  $\text{C}_{15}\text{H}_{12}\text{NO}_3$   $[\text{M}-\text{H}]^-$ : 254.0812; Found: 254.0823.

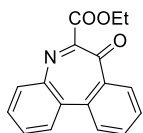

**Ethyl 7-oxo-7H-dibenzo[b,d]azepine-6-carboxylate (1).** Yellow solid (22.6 mg, 80% yield). Mp = 138.2 – 140.6 °C.  $^1\text{H}$  NMR (400 MHz,  $\text{CDCl}_3$ )  $\delta$  7.82 (d,  $J = 8.0$  Hz, 1H), 7.73 (d,  $J = 8.0$  Hz, 1H), 7.70 – 7.62 (m, 3H), 7.53 (t,  $J = 7.4$  Hz, 1H), 7.45 (t,  $J = 7.6$  Hz, 1H), 7.36 (t,  $J = 7.6$  Hz, 1H), 4.33 (q,  $J = 7.1$  Hz, 2H), 1.29 (t,  $J = 7.1$  Hz, 3H).  $^{13}\text{C}$  NMR (100 MHz,  $\text{CDCl}_3$ )  $\delta$  189.3, 162.5, 154.7, 142.3, 141.5, 135.6, 132.7, 131.6, 130.7, 130.4, 129.1, 129.0, 128.7, 128.5, 126.1, 62.6, 14.0. HRMS (ESI): Calculated for  $\text{C}_{17}\text{H}_{14}\text{NO}_3$   $[\text{M}+\text{H}]^+$ : 280.0968; Found: 280.0981.

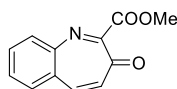

**Methyl 3-oxo-3H-benzo[b]azepine-2-carboxylate (2).** Yellow solid (14.2 mg, 68% yield). Mp = 78.2 – 80.2 °C.  $^1\text{H}$  NMR (400 MHz,  $\text{CDCl}_3$ )  $\delta$  7.99 – 7.90 (m, 1H), 7.68 – 7.61 (m, 2H), 7.58 – 7.51 (m, 2H), 6.77 (d,  $J = 12.1$  Hz, 1H), 3.91 (s, 3H).  $^{13}\text{C}$  NMR (100 MHz,  $\text{CDCl}_3$ )  $\delta$  180.4, 166.2, 156.1, 144.7, 143.8, 135.4, 133.4, 132.9, 132.2, 131.5, 131.2, 52.9. HRMS (ESI): Calculated for  $\text{C}_{12}\text{H}_9\text{NO}_3\text{Na}$   $[\text{M}+\text{Na}]^+$ : 238.0475; Found: 238.0474.

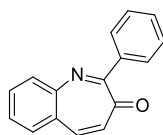

**2-Phenyl-3H-benzo[b]azepin-3-one (3).** Brown solid (10.3 mg, 46% yield). Mp = 82.4 – 84.6 °C.  $^1\text{H}$  NMR (400 MHz,  $\text{CDCl}_3$ )  $\delta$  8.03 – 8.01 (m, 2H), 7.94 (d,  $J = 8.0$

Hz, 1H), 7.66 – 7.64 (m, 2H), 7.53 (d,  $J = 12.0$  Hz, 1H), 7.39 – 7.36 (m, 4H), 6.73 (d,  $J = 12.0$  Hz, 1H).  $^{13}\text{C}$  NMR (100 MHz,  $\text{CDCl}_3$ )  $\delta$  183.6, 160.3, 145.7, 141.5, 137.1, 133.1, 131.8, 131.5, 131.0, 130.8, 129.4, 129.3, 128.3, 127.9. HRMS (ESI): Calculated for  $\text{C}_{16}\text{H}_{11}\text{NONa}$   $[\text{M}+\text{Na}]^+$ : 256.0733; Found: 256.0733.

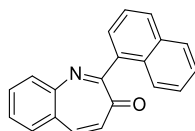

**2-(Naphthalen-1-yl)-3H-benzo[b]azepin-3-one (4).** Yellow solid (12.2 mg, 44% yield).  $\text{Mp} = 206.8 - 208.2$  °C.  $^1\text{H}$  NMR (400 MHz,  $\text{CDCl}_3$ )  $\delta$  7.91 – 7.77 (m, 4H), 7.70 (d,  $J = 7.1$  Hz, 1H), 7.62 – 7.53 (m, 3H), 7.51 – 7.35 (m, 4H), 6.82 (d,  $J = 12.0$  Hz, 1H).  $^{13}\text{C}$  NMR (100 MHz,  $\text{CDCl}_3$ )  $\delta$  183.5, 164.1, 145.7, 142.7, 137.5, 134.2, 133.7, 132.4, 132.0, 131.5, 130.6, 130.1, 129.8, 129.1, 128.6, 127.7, 126.5, 125.9, 125.2, 124.8. HRMS (ESI): Calculated for  $\text{C}_{20}\text{H}_{13}\text{NONa}$   $[\text{M}+\text{Na}]^+$ : 306.0889; Found: 306.0888.

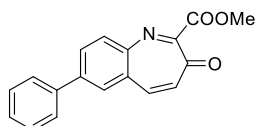

**Methyl 3-oxo-7-phenyl-3H-benzo[b]azepine-2-carboxylate (5).** Yellow solid (22.7 mg, 78% yield).  $\text{Mp} = 139.8 - 142.4$  °C.  $^1\text{H}$  NMR (400 MHz,  $\text{CDCl}_3$ )  $\delta$  7.95 (d,  $J = 8.4$  Hz, 1H), 7.85 – 7.76 (m, 2H), 7.58 – 7.51 (m, 3H), 7.43 – 7.37 (m, 2H), 7.37 – 7.30 (m, 1H), 6.75 (d,  $J = 12.1$  Hz, 1H), 3.89 (s, 3H).  $^{13}\text{C}$  NMR (100 MHz,  $\text{CDCl}_3$ )  $\delta$  180.3, 166.3, 155.7, 143.9, 143.8, 143.6, 138.3, 136.0, 133.0, 131.8, 131.5, 130.5, 129.1, 128.7, 127.1, 52.8. HRMS (ESI): Calculated for  $\text{C}_{18}\text{H}_{13}\text{NO}_3\text{Na}$   $[\text{M}+\text{Na}]^+$ : 314.0787; Found: 314.0782.

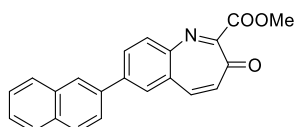

**Methyl 7-(naphthalen-2-yl)-3-oxo-3H-benzo[b]azepine-2-carboxylate (6).**



Yellow solid (20.1 mg, 59% yield). Mp = 206.2 – 208.6 °C. <sup>1</sup>H NMR (400 MHz, CDCl<sub>3</sub>) δ 8.13 – 8.07 (m, 2H), 8.07 – 8.01 (m, 1H), 7.99 – 7.94 (m, 2H), 7.94 – 7.86 (m, 2H), 7.80 – 7.74 (m, 1H), 7.65 (d, *J* = 12.2 Hz, 1H), 7.58 – 7.51 (m, 2H), 6.86 (d, *J* = 12.1 Hz, 1H), 4.00 (s, 3H). <sup>13</sup>C NMR (100 MHz, CDCl<sub>3</sub>) δ 180.4, 166.3, 155.7, 143.7, 143.6, 143.7, 136.1, 135.6, 133.4, 133.1, 133.0, 131.9, 131.7, 130.7, 129.0, 128.3, 127.7, 126.8, 126.7, 126.5, 124.7, 52.9. HRMS (ESI): Calculated for C<sub>22</sub>H<sub>16</sub>NO<sub>3</sub> [M+H]<sup>+</sup>: 342.1125; Found: 342.1124.

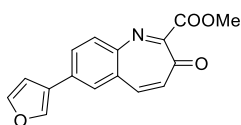

**Methyl 7-(furan-3-yl)-3-oxo-3H-benzo[*b*]azepine-2-carboxylate (7).** Yellow solid (11.8 mg, 42% yield). Mp = 227.2 – 229.0 °C. <sup>1</sup>H NMR (400 MHz, CDCl<sub>3</sub>) δ 7.95 (d, *J* = 8.3 Hz, 1H), 7.86 – 7.81 (m, 1H), 7.78 – 7.73 (m, 1H), 7.71 (d, *J* = 2.1 Hz, 1H), 7.54 (d, *J* = 12.1 Hz, 1H), 7.51 – 7.46 (m, 1H), 6.79 (d, *J* = 12.1 Hz, 1H), 6.74 – 6.70 (m, 1H), 3.92 (s, 3H). <sup>13</sup>C NMR (100 MHz, CDCl<sub>3</sub>) δ 180.5, 166.4, 155.4, 144.5, 143.6, 143.4, 140.1, 136.2, 135.7, 133.3, 132.2, 129.9, 129.2, 124.7, 108.4, 52.9. HRMS (ESI): Calculated for C<sub>16</sub>H<sub>12</sub>NO<sub>4</sub> [M+H]<sup>+</sup>: 282.0760; Found: 282.0755.

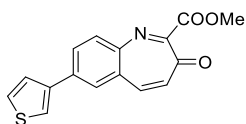

**Methyl 3-oxo-7-(thiophen-3-yl)-3H-benzo[*b*]azepine-2-carboxylate (8)** . Yellow solid (21.4 mg, 72% yield). Mp = 230.4 – 232.0 °C. <sup>1</sup>H NMR (400 MHz, CDCl<sub>3</sub>) δ 8.03 (d, *J* = 8.3 Hz, 1H), 7.94 – 7.87 (m, 2H), 7.68 – 7.61 (m, 2H), 7.48 (d, *J* = 2.2 Hz, 2H), 6.86 (d, *J* = 12.1 Hz, 1H), 3.99 (s, 3H). <sup>13</sup>C NMR (100 MHz, CDCl<sub>3</sub>) δ 180.4, 166.3, 155.4, 143.7, 143.4, 139.7, 138.5, 136.2, 133.2, 132.1, 130.6, 129.8, 127.3, 125.9, 122.8, 52.9. HRMS (ESI): Calculated for C<sub>16</sub>H<sub>12</sub>NO<sub>3</sub>S [M+H]<sup>+</sup>: 298.0532; Found: 298.0532.

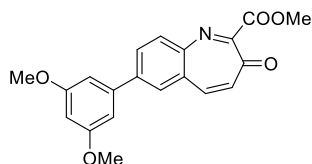

**Methyl 7-(3,5-dimethoxyphenyl)-3-oxo-3H-benzo[*b*]azepine-2-carboxylate (9).**

Yellow solid (22.8 mg, 66% yield). Mp = 241.6 – 243.4 °C. <sup>1</sup>H NMR (400 MHz, CDCl<sub>3</sub>) δ 7.99 (d, *J* = 8.3 Hz, 1H), 7.87 – 7.82 (m, 1H), 7.79 (d, *J* = 2.2 Hz, 1H), 7.58 (d, *J* = 12.1 Hz, 1H), 6.80 (d, *J* = 12.2 Hz, 1H), 6.71 (d, *J* = 2.2 Hz, 2H), 6.47 (t, *J* = 2.2 Hz, 1H), 3.92 (s, 3H), 3.80 (s, 6H). <sup>13</sup>C NMR (100 MHz, CDCl<sub>3</sub>) δ 180.4, 166.3, 161.3, 155.8, 144.0, 143.9, 143.8, 140.6, 136.0, 133.2, 131.9, 131.7, 130.7, 105.6, 100.4, 55.5, 53.0. HRMS (ESI): Calculated for C<sub>20</sub>H<sub>18</sub>NO<sub>5</sub> [M+H]<sup>+</sup>: 352.1179; Found: 352.1184.

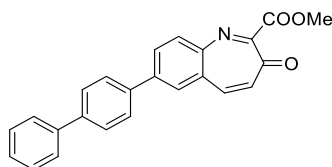

**Methyl 7-([1,1'-biphenyl]-4-yl)-3-oxo-3H-benzo[*b*]azepine-2-carboxylate (10).**

Yellow solid (16.1 mg, 44% yield). Mp = 237.8 – 239.8 °C. <sup>1</sup>H NMR (400 MHz, CDCl<sub>3</sub>) δ 8.02 (d, *J* = 8.3 Hz, 1H), 7.94 – 7.88 (m, 1H), 7.86 (d, *J* = 2.2 Hz, 1H), 7.70 – 7.65 (m, 4H), 7.61 – 7.56 (m, 3H), 7.43 – 7.38 (m, 2H), 7.35 – 7.29 (m, 1H), 6.80 (d, *J* = 12.1 Hz, 1H), 3.92 (s, 3H). <sup>13</sup>C NMR (100 MHz, CDCl<sub>3</sub>) δ 180.5, 166.3, 155.7, 143.8, 143.8, 143.5, 141.6, 140.1, 137.2, 136.2, 133.2, 132.0, 131.4, 130.5, 128.9, 127.8, 127.8, 127.6, 127.0, 52.9. HRMS (ESI): Calculated for C<sub>24</sub>H<sub>17</sub>NO<sub>3</sub>Na [M+Na]<sup>+</sup>: 390.1100; Found: 390.1099.

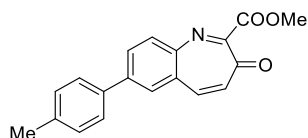

**Methyl 3-oxo-7-(*p*-tolyl)-3H-benzo[*b*]azepine-2-carboxylate (11).** Yellow solid (22.0 mg, 72% yield). Mp = 192.8 – 194.2 °C. <sup>1</sup>H NMR (400 MHz, CDCl<sub>3</sub>) δ 8.05 (d, *J* = 8.2 Hz, 1H), 7.94 – 7.89 (m, 1H), 7.87 (d, *J* = 2.2 Hz, 1H), 7.64 (d, *J* = 12.2 Hz,

1H), 7.57 (d,  $J = 8.2$  Hz, 2H), 7.31 (d,  $J = 7.9$  Hz, 2H), 6.86 (d,  $J = 12.1$  Hz, 1H), 3.99 (s, 3H), 2.43 (s, 3H).  $^{13}\text{C}$  NMR (100 MHz,  $\text{CDCl}_3$ )  $\delta$  180.4, 166.4, 155.5, 143.9, 143.9, 143.5, 138.9, 136.1, 135.5, 133.1, 131.9, 131.3, 130.4, 129.9, 127.0, 52.9, 21.2. HRMS (ESI): Calculated for  $\text{C}_{19}\text{H}_{15}\text{NO}_3\text{Na}$   $[\text{M}+\text{Na}]^+$ : 328.0944; Found: 328.0937.

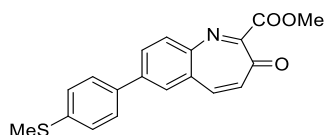

**Methyl 7-(4-(methylthio)phenyl)-3-oxo-3H-benzo[*b*]azepine-2-carboxylate (12).**

Yellow solid (18.5 mg, 56% yield). Mp = 192.6 – 194.4 °C.  $^1\text{H}$  NMR (400 MHz,  $\text{CDCl}_3$ )  $\delta$  8.04 (d,  $J = 8.3$  Hz, 1H), 7.91 – 7.83 (m, 2H), 7.66 – 7.56 (m, 3H), 7.38 – 7.31 (m, 2H), 6.85 (d,  $J = 12.1$  Hz, 1H), 3.99 (s, 3H), 2.53 (s, 3H).  $^{13}\text{C}$  NMR (100 MHz,  $\text{CDCl}_3$ )  $\delta$  180.4, 166.3, 155.6, 143.7, 143.5, 143.2, 140.0, 136.1, 134.7, 133.1, 132.0, 131.0, 130.1, 127.4, 126.5, 52.9, 15.3. HRMS (ESI): Calculated for  $\text{C}_{19}\text{H}_{16}\text{NO}_3\text{S}$   $[\text{M}+\text{H}]^+$ : 338.0845; Found: 338.0847.

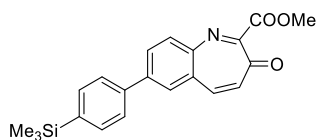

**Methyl 3-oxo-7-(4-(trimethylsilyl)phenyl)-3H-benzo[*b*]azepine-2-carboxylate (13).**

Yellow solid (24.3 mg, 68% yield). Mp = 205.6 – 207.4 °C.  $^1\text{H}$  NMR (400 MHz,  $\text{CDCl}_3$ )  $\delta$  8.06 (d,  $J = 8.3$  Hz, 1H), 7.97 – 7.86 (m, 2H), 7.73 – 7.62 (m, 5H), 6.86 (d,  $J = 12.1$  Hz, 1H), 3.99 (s, 3H), 0.32 (s, 9H).  $^{13}\text{C}$  NMR (100 MHz,  $\text{CDCl}_3$ )  $\delta$  180.4, 166.3, 155.7, 143.9, 143.8, 143.7, 141.4, 138.7, 136.1, 134.1, 133.1, 131.9, 131.6, 130.5, 126.4, 52.8, -1.2. HRMS (ESI): Calculated for  $\text{C}_{21}\text{H}_{22}\text{NO}_3\text{Si}$   $[\text{M}+\text{H}]^+$ : 364.1363; Found: 364.1364.

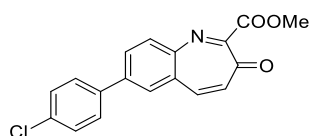

**Methyl 7-(4-chlorophenyl)-3-oxo-3H-benzo[*b*]azepine-2-carboxylate (14).**

Yellow solid (17.9 mg, 56% yield). Mp = 238.2 – 240.0 °C. <sup>1</sup>H NMR (400 MHz, CDCl<sub>3</sub>) δ 8.05 (d, *J* = 8.3 Hz, 1H), 7.92 – 7.82 (m, 2H), 7.67 – 7.57 (m, 3H), 7.46 (d, *J* = 8.2 Hz, 2H), 6.85 (d, *J* = 12.1 Hz, 1H), 3.98 (s, 3H). <sup>13</sup>C NMR (100 MHz, CDCl<sub>3</sub>) δ 180.3, 166.2, 155.8, 143.8, 143.6, 142.6, 136.8, 136.1, 135.0, 133.2, 131.9, 131.4, 130.3, 129.3, 128.4, 52.9. HRMS (ESI): Calculated for C<sub>18</sub>H<sub>13</sub>ClNO<sub>3</sub> [M+H]<sup>+</sup>: 326.0578; Found: 326.0577.

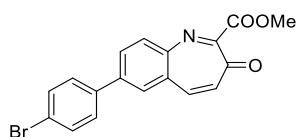

**Methyl 7-(4-bromophenyl)-3-oxo-3H-benzo[*b*]azepine-2-carboxylate (15).**

Yellow solid (19.6 mg, 53% yield). Mp = 208.8 – 210.2 °C. <sup>1</sup>H NMR (400 MHz, CDCl<sub>3</sub>) δ 8.01 (d, *J* = 8.3 Hz, 1H), 7.85 – 7.80 (m, 1H), 7.78 (d, *J* = 2.2 Hz, 1H), 7.60 – 7.54 (m, 3H), 7.49 – 7.45 (m, 2H), 6.81 (d, *J* = 12.2 Hz, 1H), 3.92 (s, 3H). <sup>13</sup>C NMR (100 MHz, CDCl<sub>3</sub>) δ 180.4, 166.2, 155.9, 143.9, 143.6, 142.7, 137.4, 136.2, 133.4, 132.3, 132.0, 131.4, 130.3, 128.8, 123.3, 51.0. HRMS (ESI): Calculated for C<sub>18</sub>H<sub>12</sub>BrNO<sub>3</sub>Na [M+Na]<sup>+</sup>: 391.9893; Found: 391.9880.

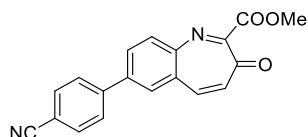

**Methyl 7-(4-cyanophenyl)-3-oxo-3H-benzo[*b*]azepine-2-carboxylate (16).**

Yellow solid (9.5 mg, 32% yield). Mp = 296.4 – 298.2 °C. <sup>1</sup>H NMR (400 MHz, CDCl<sub>3</sub>) δ 8.05 (d, *J* = 8.3 Hz, 1H), 7.88 – 7.82 (m, 2H), 7.76 – 7.70 (m, 4H), 7.60 (d, *J* = 12.1 Hz, 1H), 6.83 (d, *J* = 12.0 Hz, 1H), 3.93 (s, 3H). <sup>13</sup>C NMR (100 MHz, CDCl<sub>3</sub>) δ 180.3, 166.0, 156.3, 144.6, 143.2, 142.9, 141.7, 136.3, 133.6, 132.9, 132.0, 131.8, 130.5, 128.0, 118.4, 112.4, 53.0. HRMS (ESI): Calculated for C<sub>19</sub>H<sub>13</sub>N<sub>2</sub>O<sub>3</sub> [M+H]<sup>+</sup>: 317.0921; Found: 317.0918.

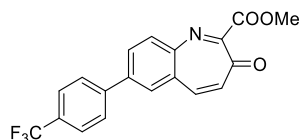

**Methyl 3-oxo-7-(4-(trifluoromethyl)phenyl)-3H-benzo[*b*]azepine-2-carboxylate**

**(17).** Yellow solid (25.5 mg, 71% yield). Mp = 225.8 – 227.8 °C. <sup>1</sup>H NMR (400 MHz, CDCl<sub>3</sub>) δ 8.11 (d, *J* = 8.1 Hz, 1H), 7.97 – 7.90 (m, 2H), 7.82 – 7.75 (m, 4H), 7.67 (d, *J* = 12.2 Hz, 1H), 6.88 (d, *J* = 12.1 Hz, 1H), 3.99 (s, 3H). <sup>13</sup>C NMR (100 MHz, CDCl<sub>3</sub>) δ 180.3, 166.1, 156.2, 144.3, 143.4, 142.3, 142.0, 136.2, 133.4, 132.0, 131.8, 130.8, 130.6, 130.5, 127.6, 126.1 (q, *J* = 3.9 Hz), 53.0. <sup>19</sup>F NMR (376 MHz, CDCl<sub>3</sub>) δ -62.9. HRMS (ESI): Calculated for C<sub>19</sub>H<sub>12</sub>F<sub>3</sub>NO<sub>3</sub>Na [M+Na]<sup>+</sup>: 382.0662; Found: 382.0650.

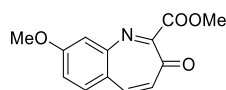

**Methyl 8-methoxy-3-oxo-3H-benzo[*b*]azepine-2-carboxylate (18).** Yellow solid (13.5 mg, 55% yield). Mp = 138.0 – 140.2 °C. <sup>1</sup>H NMR (400 MHz, CDCl<sub>3</sub>) δ 7.53 (d, *J* = 8.6 Hz, 1H), 7.47 (d, *J* = 12.0 Hz, 1H), 7.38 (d, *J* = 2.8 Hz, 1H), 7.12 – 7.06 (m, 1H), 6.64 (d, *J* = 11.9 Hz, 1H), 3.90 (s, 3H), 3.85 (s, 3H). <sup>13</sup>C NMR (100 MHz, CDCl<sub>3</sub>) δ 180.1, 166.5, 162.4, 157.2, 146.5, 143.7, 134.9, 130.2, 125.1, 119.5, 117.5, 55.8, 52.8. HRMS (ESI): Calculated for C<sub>13</sub>H<sub>11</sub>NO<sub>4</sub>Na [M+Na]<sup>+</sup>: 268.0580; Found: 268.0578.

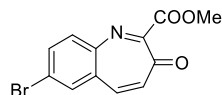

**Methyl 7-bromo-3-oxo-3H-benzo[*b*]azepine-2-carboxylate (19).** Yellow solid (16.6 mg, 58% yield). Mp = 174.2 – 175.8 °C. <sup>1</sup>H NMR (400 MHz, CDCl<sub>3</sub>) δ 7.82 – 7.71 (m, 3H), 7.42 (d, *J* = 12.2 Hz, 1H), 6.80 (d, *J* = 12.2 Hz, 1H), 3.91 (s, 3H). <sup>13</sup>C NMR (100 MHz, CDCl<sub>3</sub>) δ 180.2, 165.9, 156.1, 143.5, 142.1, 136.8, 135.5, 135.1,

134.1, 132.7, 125.3, 53.0. HRMS (ESI): Calculated for C<sub>12</sub>H<sub>8</sub>BrNO<sub>3</sub>Na [M+Na]<sup>+</sup>: 315.9579; Found: 315.9573.

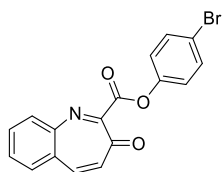

**4-Bromophenyl 3-oxo-3H-benzo[*b*]azepine-2-carboxylate (20).** Yellow solid (14.5 mg, 41% yield). Mp = 191.6 – 193.4 °C. <sup>1</sup>H NMR (400 MHz, CDCl<sub>3</sub>) δ 8.10 (d, *J* = 7.9 Hz, 1H), 7.80 – 7.73 (m, 2H), 7.71 – 7.63 (m, 2H), 7.60 – 7.51 (m, 2H), 7.25 – 7.20 (m, 2H), 6.90 (d, *J* = 12.1 Hz, 1H). <sup>13</sup>C NMR (100 MHz, CDCl<sub>3</sub>) δ 180.3, 164.1, 155.6, 149.5, 144.7, 144.3, 135.8, 133.7, 133.0, 132.6, 132.4, 131.7, 131.7, 123.4, 119.5. HRMS (ESI): Calculated for C<sub>17</sub>H<sub>10</sub>BrNO<sub>3</sub>Na [M+Na]<sup>+</sup>: 377.9736; Found: 377.9743.

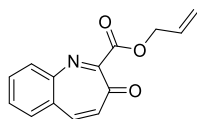

**Allyl 3-oxo-3H-benzo[*b*]azepine-2-carboxylate (21).** Yellow solid (12.1 mg, 52% yield). Mp = 96.4 – 98.6 °C. <sup>1</sup>H NMR (400 MHz, CDCl<sub>3</sub>) δ 7.95 (d, *J* = 8.4 Hz, 1H), 7.68 – 7.61 (m, 2H), 7.58 – 7.50 (m, 2H), 6.77 (d, *J* = 12.0 Hz, 1H), 6.02 – 5.88 (m, 1H), 5.45 – 5.36 (m, 1H), 5.28 – 5.21 (m, 1H), 4.85 – 4.78 (m, 2H). <sup>13</sup>C NMR (100 MHz, CDCl<sub>3</sub>) δ 180.4, 165.5, 156.2, 144.8, 143.9, 135.5, 133.4, 132.9, 132.2, 131.5, 131.3, 131.2, 119.1, 66.5. HRMS (ESI): Calculated for C<sub>14</sub>H<sub>12</sub>NO<sub>3</sub> [M+H]<sup>+</sup>: 242.0812; Found: 242.0808.

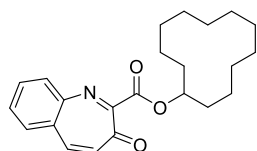

**Cyclododecyl 3-oxo-3H-benzo[*b*]azepine-2-carboxylate (22).** Yellow solid (22.8 mg, 62% yield). Mp = 171.8 – 173.4 °C. <sup>1</sup>H NMR (400 MHz, CDCl<sub>3</sub>) δ 7.93 (d, *J* = 7.9 Hz, 1H), 7.65 – 7.59 (m, 2H), 7.55 – 7.48 (m, 2H), 6.73 (d, *J* = 12.1 Hz, 1H),

5.32 – 5.18 (m, 1H), 1.82 – 1.73 (m, 2H), 1.64 – 1.56 (m, 2H), 1.43 – 1.25 (m, 18H).  
 $^{13}\text{C}$  NMR (100 MHz,  $\text{CDCl}_3$ )  $\delta$  180.4, 165.7, 157.0, 144.9, 143.8, 135.5, 133.3,  
132.9, 132.0, 131.4, 130.9, 74.7, 28.7, 24.1, 24.0, 23.2, 23.0, 20.6. HRMS (ESI):  
Calculated for  $\text{C}_{23}\text{H}_{29}\text{NO}_3\text{Na}$   $[\text{M}+\text{Na}]^+$ : 390.2039; Found: 390.2039.

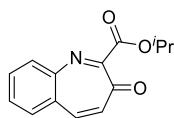

**Isopropyl 3-oxo-3H-benzo[*b*]azepine-2-carboxylate (23).** Yellow oil (18.0 mg, 76% yield).  $^1\text{H}$  NMR (400 MHz,  $\text{CDCl}_3$ )  $\delta$  7.95 (d,  $J = 7.9$  Hz, 1H), 7.66 – 7.59 (m, 2H), 7.56 – 7.49 (m, 2H), 6.75 (d,  $J = 12.2$  Hz, 1H), 5.31 – 5.20 (m, 1H), 1.33 (d,  $J = 6.3$  Hz, 6H).  $^{13}\text{C}$  NMR (100 MHz,  $\text{CDCl}_3$ )  $\delta$  180.4, 165.6, 156.8, 144.9, 143.8, 135.5, 133.4, 133.0, 132.1, 131.5, 131.0, 70.1, 21.6. HRMS (ESI): Calculated for  $\text{C}_{14}\text{H}_{14}\text{NO}_3$   $[\text{M}+\text{H}]^+$ : 244.0968; Found: 244.0968.

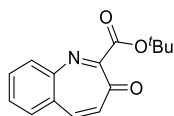

**Tert-butyl 3-oxo-3H-benzo[*b*]azepine-2-carboxylate (24).** Brown solid (14.9 mg, 58% yield). Mp = 66.4 – 68.8 °C.  $^1\text{H}$  NMR (400 MHz,  $\text{CDCl}_3$ )  $\delta$  7.94 (d,  $J = 8.3$  Hz, 1H), 7.65 – 7.56 (m, 2H), 7.55 – 7.45 (m, 2H), 6.73 (d,  $J = 12.1$  Hz, 1H), 1.55 (s, 9H).  $^{13}\text{C}$  NMR (100 MHz,  $\text{CDCl}_3$ )  $\delta$  180.6, 165.2, 157.1, 145.0, 143.7, 135.3, 133.3, 133.0, 132.0, 131.4, 130.8, 83.6, 28.0. HRMS (ESI): Calculated for  $\text{C}_{15}\text{H}_{16}\text{NO}_3$   $[\text{M}+\text{H}]^+$ : 258.1125; Found: 258.1124.

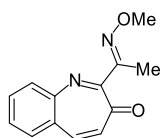

**2-(1-(Methoxyimino)ethyl)-3H-benzo[*b*]azepin-3-one (25).** Yellow solid (10.9 mg, 48% yield). Mp = 64.4 – 66.6 °C.  $^1\text{H}$  NMR (400 MHz,  $\text{CDCl}_3$ )  $\delta$  7.76 – 7.72 (m, 1H), 7.53 – 7.48 (m, 2H), 7.37 – 7.32 (m, 2H), 6.63 (d,  $J = 12.1$  Hz, 1H), 3.95 (s, 3H), 2.17 (s, 3H).  $^{13}\text{C}$  NMR (100 MHz,  $\text{CDCl}_3$ )  $\delta$  183.9, 157.9, 156.1, 145.2, 140.1, 132.6,

131.8, 131.6, 130.6, 129.3, 128.1, 62.7, 11.4. HRMS (ESI): Calculated for  $C_{13}H_{12}N_2O_2Na$   $[M+Na]^+$ : 251.0790; Found: 251.0793.

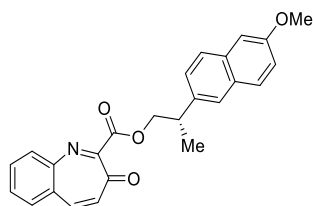

**(S)-2-(6-methoxynaphthalen-2-yl)propyl 3-oxo-3H-benzo[b]azepine-2-carboxylate (26).** Yellow solid (12.8 mg, 33% yield). Mp = 144.6 – 146.6 °C.  $^1H$  NMR (400 MHz,  $CDCl_3$ )  $\delta$  7.88 – 7.80 (m, 1H), 7.63 – 7.55 (m, 5H), 7.52 – 7.43 (m, 2H), 7.34 – 7.29 (m, 1H), 7.10 – 6.96 (m, 2H), 6.71 (d,  $J$  = 12.1 Hz, 1H), 4.52 – 4.41 (m, 2H), 3.81 (s, 3H), 3.41 – 3.26 (m, 1H), 1.39 (d,  $J$  = 6.9 Hz, 3H).  $^{13}C$  NMR (100 MHz,  $CDCl_3$ )  $\delta$  180.3, 165.9, 157.4, 156.3, 144.7, 143.8, 137.8, 135.5, 133.5, 133.4, 132.8, 132.1, 131.5, 131.1, 129.1, 128.9, 127.0, 126.3, 125.7, 118.8, 105.5, 70.7, 55.2, 38.8, 18.0. HRMS (ESI): Calculated for  $C_{25}H_{21}NO_4Na$   $[M+Na]^+$ : 422.1362; Found: 422.1362.

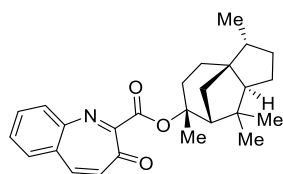

**(3R,3aS,6R,7R,8aS)-3,6,8,8-tetramethyloctahydro-1H-3a,7-methanoazulen-6-yl 3-oxo-3H-benzo[b]azepine-2-carboxylate (27).** Yellow solid (18.6 mg, 46% yield). Mp = 197.4 – 199.2 °C.  $^1H$  NMR (400 MHz,  $CDCl_3$ )  $\delta$  7.90 (d,  $J$  = 7.9 Hz, 1H), 7.65 – 7.57 (m, 2H), 7.54 – 7.46 (m, 2H), 6.73 (d,  $J$  = 11.9 Hz, 1H), 2.38 (d,  $J$  = 5.0 Hz, 1H), 2.23 – 2.15 (m, 1H), 2.09 – 1.99 (m, 1H), 1.83 – 1.73 (m, 2H), 1.70 (s, 3H), 1.66 – 1.58 (m, 2H), 1.55 – 1.26 (m, 6H), 1.19 (s, 3H), 0.93 (s, 3H), 0.77 (d,  $J$  = 7.2 Hz, 3H).  $^{13}C$  NMR (100 MHz,  $CDCl_3$ )  $\delta$  180.5, 164.8, 157.0, 145.1, 143.6, 135.3, 133.2, 133.0, 131.9, 131.5, 130.6, 90.0, 57.8, 56.7, 53.8, 43.5, 41.2, 41.0, 36.9, 32.8, 31.3, 28.5, 27.2, 25.5, 25.3, 15.5. HRMS (ESI): Calculated for  $C_{26}H_{31}NO_3Na$   $[M+Na]^+$ : 428.2196; Found: 428.2199.



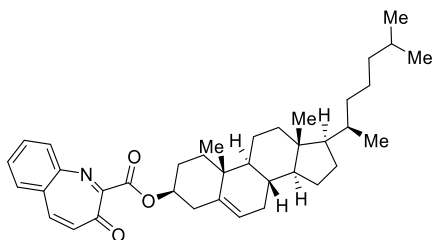

**(3*S*,8*S*,9*S*,10*R*,13*R*,14*S*,17*R*)-10,13-Dimethyl-17-((*R*)-6-methylheptan-2-yl)-2,3,4,7,8,9,10,11,12,13,14,15,16,17-tetradecahydro-1*H*-cyclopenta[*a*]phenanthren-3-yl 3-oxo-3*H*-benzo[*b*]azepine-2-carboxylate (28).** Yellow solid (25.0 mg, 44% yield). Mp = 175.4 – 177.2 °C. <sup>1</sup>H NMR (400 MHz, CDCl<sub>3</sub>) δ 7.97 (d, *J* = 7.9 Hz, 1H), 7.67 – 7.61 (m, 2H), 7.56 – 7.49 (m, 2H), 6.76 (d, *J* = 12.2 Hz, 1H), 5.39 – 5.33 (m, 1H), 4.95 – 4.81 (m, 1H), 2.52 – 2.35 (m, 2H), 2.06 – 1.61 (m, 7H), 1.57 – 1.35 (m, 7H), 1.31 – 1.02 (m, 12H), 0.97 (s, 3H), 0.85 (d, *J* = 6.4 Hz, 3H), 0.79 (dd, *J* = 6.7, *J* = 1.9 Hz, 6H), 0.61 (s, 3H). <sup>13</sup>C NMR (100 MHz, CDCl<sub>3</sub>) δ 180.4, 165.4, 156.8, 144.9, 143.8, 139.4, 135.5, 133.4, 132.9, 132.1, 131.5, 131.0, 122.9, 76.1, 56.6, 56.1, 49.9, 42.2, 39.7, 39.5, 37.8, 36.9, 36.5, 36.1, 35.7, 31.9, 31.8, 28.2, 28.0, 27.5, 24.2, 23.8, 22.8, 22.5, 21.0, 19.3, 18.7, 11.8. HRMS (ESI): Calculated for C<sub>38</sub>H<sub>52</sub>NO<sub>3</sub> [M+H]<sup>+</sup>: 570.3941; Found: 570.3941.

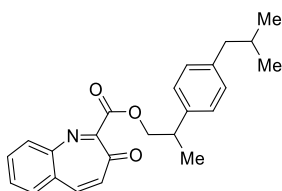

**2-(4-Isobutylphenyl)propyl 3-oxo-3*H*-benzo[*b*]azepine-2-carboxylate (29).** Yellow oil (19.1 mg, 52% yield). <sup>1</sup>H NMR (400 MHz, CDCl<sub>3</sub>) δ 7.88 (d, *J* = 8.1 Hz, 1H), 7.62 – 7.55 (m, 2H), 7.53 – 7.44 (m, 2H), 7.13 – 7.07 (m, 2H), 7.04 – 6.98 (m, 2H), 6.71 (d, *J* = 12.1 Hz, 1H), 4.45 – 4.36 (m, 1H), 4.38 – 4.27 (m, 1H), 3.21 – 3.10 (m, 1H), 2.35 (d, *J* = 7.1 Hz, 2H), 1.81 – 1.71 (m, 1H), 1.31 (d, *J* = 7.0 Hz, 3H), 0.80 (d, *J* = 6.7 Hz, 6H). <sup>13</sup>C NMR (100 MHz, CDCl<sub>3</sub>) δ 180.3, 165.8, 156.3, 144.7, 143.7, 140.0, 139.8, 135.4, 133.4, 132.8, 132.0, 131.4, 131.1, 129.2, 127.0, 70.8, 44.9, 38.4,

30.1, 22.3, 17.9. HRMS (ESI): Calculated for C<sub>24</sub>H<sub>26</sub>NO<sub>3</sub> [M+H]<sup>+</sup>: 376.1907; Found: 376.1917.

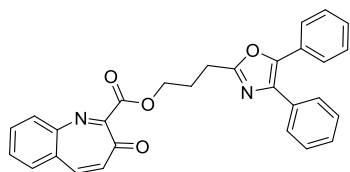

**3-(4,5-Diphenyloxazol-2-yl)propyl 3-oxo-3H-benzo[b]azepine-2-carboxylate (30).**

Yellow solid (31.4 mg, 68% yield). Mp = 68.2 – 70.2 °C. <sup>1</sup>H NMR (400 MHz, CDCl<sub>3</sub>) δ 7.86 (d, *J* = 7.9 Hz, 1H), 7.55 – 7.40 (m, 8H), 7.25 – 7.16 (m, 6H), 6.67 (d, *J* = 12.1 Hz, 1H), 4.47 (t, *J* = 6.2 Hz, 2H), 2.94 (t, *J* = 7.5 Hz, 2H), 2.30 – 2.22 (m, 2H). <sup>13</sup>C NMR (100 MHz, CDCl<sub>3</sub>) δ 180.2, 165.8, 162.2, 156.2, 145.1, 144.5, 143.8, 135.3, 134.9, 133.3, 132.6, 132.3, 132.0, 131.3, 131.1, 128.8, 128.4, 128.3, 128.2, 127.8, 127.7, 126.2, 64.8, 25.8, 24.6. HRMS (ESI): Calculated for C<sub>29</sub>H<sub>23</sub>N<sub>2</sub>O<sub>4</sub> [M+H]<sup>+</sup>: 463.1652; Found: 463.1653.

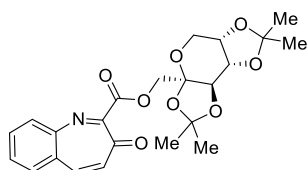

**((3aR,5aS,8aS,8bR)-2,2,7,7-tetramethyltetrahydro-3aH-bis([1,3]dioxolo)[4,5-b:4',5'-d]pyran-3a-yl)methyl 3-oxo-3H-benzo[b]azepine-2-carboxylate (31).**

Yellow solid (26.6 mg, 60% yield). Mp = 88.2 – 90.4 °C. <sup>1</sup>H NMR (400 MHz, CDCl<sub>3</sub>) δ 7.88 (d, *J* = 7.9 Hz, 1H), 7.66 – 7.60 (m, 2H), 7.58 – 7.50 (m, 2H), 6.73 (d, *J* = 12.1 Hz, 1H), 4.60 – 4.47 (m, 2H), 4.41 – 4.31 (m, 2H), 4.20 – 4.14 (m, 1H), 3.92 – 3.82 (m, 1H), 3.70 (d, *J* = 13.0 Hz, 1H), 1.46 (s, 3H), 1.39 (s, 3H), 1.34 (s, 3H), 1.25 (s, 3H). <sup>13</sup>C NMR (100 MHz, CDCl<sub>3</sub>) δ 180.1, 164.7, 155.2, 144.4, 143.7, 135.1, 133.4, 132.7, 132.1, 131.4, 131.2, 109.0, 108.9, 101.2, 70.6, 70.0, 69.9, 65.4, 61.2, 26.4, 25.7, 25.2, 24.0. HRMS (ESI): Calculated for C<sub>23</sub>H<sub>25</sub>NO<sub>8</sub>Na [M+Na]<sup>+</sup>: 466.1472; Found: 466.1470.

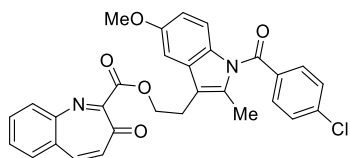

**2-(1-(4-Chlorobenzoyl)-5-methoxy-2-methyl-1H-indol-3-yl)ethyl**

**3-oxo-3H-benzo[*b*]azepine-2-carboxylate (32).** Yellow solid (38.9 mg, 74% yield).

Mp = 154.2 – 156.8 °C. <sup>1</sup>H NMR (400 MHz, CDCl<sub>3</sub>) δ 7.91 (d, *J* = 8.3 Hz, 1H), 7.66 – 7.51 (m, 6H), 7.40 – 7.31 (m, 2H), 6.94 (d, *J* = 2.5 Hz, 1H), 6.81 (d, *J* = 9.0 Hz, 1H), 6.74 (d, *J* = 12.2 Hz, 1H), 6.62 – 6.55 (m, 1H), 4.50 (t, *J* = 7.2 Hz, 2H), 3.74 (s, 3H), 3.09 (t, *J* = 7.2 Hz, 2H), 2.30 (s, 3H). <sup>13</sup>C NMR (100 MHz, CDCl<sub>3</sub>) δ 180.4, 168.3, 165.7, 156.0, 155.9, 144.7, 143.8, 139.0, 135.5, 135.4, 134.0, 133.4, 132.8, 132.2, 131.5, 131.2, 131.1, 130.9, 130.8, 129.0, 115.0, 114.9, 111.5, 100.9, 64.8, 55.6, 23.5, 13.3. HRMS (ESI): Calculated for C<sub>30</sub>H<sub>24</sub>ClN<sub>2</sub>O<sub>5</sub> [M+H]<sup>+</sup>: 527.1368; Found: 527.1364.

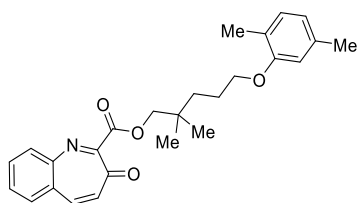

**5-(2,5-Dimethylphenoxy)-2,2-dimethylpentyl**

**3-oxo-3H-benzo[*b*]**

**azepine-2-carboxylate (33).** Yellow oil (22.2 mg, 53% yield). <sup>1</sup>H NMR (400 MHz, CDCl<sub>3</sub>) δ 7.89 (d, *J* = 7.8 Hz, 1H), 7.62 – 7.54 (m, 2H), 7.52 – 7.42 (m, 2H), 6.87 (d, *J* = 7.3 Hz, 1H), 6.75 – 6.68 (m, 1H), 6.53 (d, *J* = 8.9 Hz, 2H), 4.08 (s, 2H), 3.87 – 3.79 (m, 2H), 2.19 (s, 3H), 2.05 (s, 3H), 1.77 – 1.67 (m, 2H), 1.47 – 1.39 (m, 2H), 0.95 (s, 6H). <sup>13</sup>C NMR (100 MHz, CDCl<sub>3</sub>) δ 180.3, 166.0, 156.9, 156.5, 144.7, 143.7, 136.3, 135.4, 133.3, 132.7, 132.0, 131.4, 131.0, 130.1, 123.4, 120.5, 111.8, 73.3, 68.2, 35.2, 33.9, 24.1, 24.0, 21.3, 15.7. HRMS (ESI): Calculated for C<sub>26</sub>H<sub>29</sub>NO<sub>4</sub>Na [M+Na]<sup>+</sup>: 442.1988; Found: 442.1987.

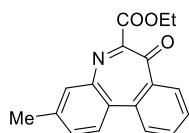

**Ethyl 3-methyl-7-oxo-7H-dibenzo[*b,d*]azepine-6-carboxylate (34).** Yellow solid (22.3 mg, 76% yield). Mp = 152.2 – 154.4 °C. <sup>1</sup>H NMR (400 MHz, CDCl<sub>3</sub>) δ 7.90 (d, *J* = 8.2 Hz, 1H), 7.77 – 7.65 (m, 4H), 7.63 – 7.58 (m, 1H), 7.31 – 7.27 (m, 1H), 4.42 (q, *J* = 7.1 Hz, 2H), 2.46 (s, 3H), 1.39 (t, *J* = 7.1 Hz, 3H). <sup>13</sup>C NMR (100 MHz, CDCl<sub>3</sub>) δ 189.5, 162.7, 154.5, 142.2, 141.2, 139.3, 135.8, 132.7, 130.7, 130.5, 129.9, 129.0, 128.9, 128.3, 126.3, 62.6, 20.8, 14.0. HRMS (ESI): Calculated for C<sub>18</sub>H<sub>16</sub>NO<sub>3</sub> [M+H]<sup>+</sup>: 294.1125; Found: 294.1138.

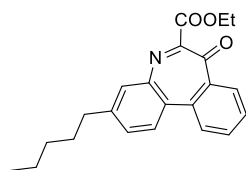

**Ethyl 7-oxo-3-pentyl-7H-dibenzo[*b,d*]azepine-6-carboxylate (35).** Yellow oil (24.4 mg, 72% yield). <sup>1</sup>H NMR (400 MHz, CDCl<sub>3</sub>) δ 7.84 (d, *J* = 8.1 Hz, 1H), 7.70 – 7.57 (m, 4H), 7.56 – 7.51 (m, 1H), 7.25 – 7.20 (m, 1H), 4.35 (q, *J* = 7.2 Hz, 2H), 2.64 (t, *J* = 7.7 Hz, 2H), 1.66 – 1.57 (m, 2H), 1.36 – 1.24 (m, 7H), 0.86 – 0.78 (m, 3H). <sup>13</sup>C NMR (100 MHz, CDCl<sub>3</sub>) δ 189.5, 162.7, 154.5, 144.4, 142.3, 141.2, 135.9, 132.7, 130.6, 130.2, 129.3, 129.2, 128.9, 128.4, 126.3, 62.7, 35.2, 31.3, 30.6, 22.5, 14.1, 14.0. HRMS (ESI): Calculated for C<sub>22</sub>H<sub>24</sub>NO<sub>3</sub> [M+H]<sup>+</sup>: 350.1751; Found: 350.1754.

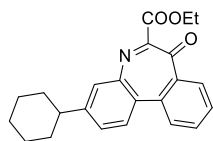

**Ethyl 3-cyclohexyl-7-oxo-7H-dibenzo[*b,d*]azepine-6-carboxylate (36).** Yellow solid (22.0 mg, 61% yield). Mp = 142.4 – 144.6 °C. <sup>1</sup>H NMR (400 MHz, CDCl<sub>3</sub>) δ 7.83 (d, *J* = 7.9 Hz, 1H), 7.70 – 7.58 (m, 4H), 7.53 (t, *J* = 7.5 Hz, 1H), 7.28 – 7.22 (m, 1H), 4.35 (q, *J* = 7.1 Hz, 2H), 2.59 – 2.47 (m, 1H), 1.88 – 1.76 (m, 4H), 1.73 – 1.66 (m, 1H), 1.44 – 1.29 (m, 7H), 1.22 – 1.16 (m, 1H). <sup>13</sup>C NMR (100 MHz, CDCl<sub>3</sub>) δ 189.4, 162.8, 154.4, 149.4, 142.4, 141.2, 135.9, 132.7, 130.6, 129.3, 128.9, 128.6,

128.4, 127.9, 126.3, 62.6, 43.9, 34.1, 26.7, 26.0, 14.0. HRMS (ESI): Calculated for  $C_{23}H_{23}NO_3Na$   $[M+Na]^+$ : 384.1570; Found: 384.1571.

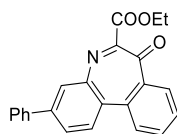

**Ethyl 7-oxo-3-phenyl-7H-dibenzo[*b,d*]azepine-6-carboxylate (37).** Yellow solid (24.9 mg, 72% yield). Mp = 200.2 – 202.4 °C.  $^1H$  NMR (400 MHz,  $CDCl_3$ )  $\delta$  8.01 (d,  $J = 2.0$  Hz, 1H), 7.87 (d,  $J = 7.9$  Hz, 1H), 7.77 (d,  $J = 8.3$  Hz, 1H), 7.69 – 7.59 (m, 5H), 7.55 (dd,  $J = 7.5$ ,  $J = 1.0$  Hz, 1H), 7.41 – 7.37 (m, 2H), 7.33 – 7.29 (m, 1H), 4.35 (q,  $J = 7.2$  Hz, 2H), 1.32 (t,  $J = 7.1$  Hz, 3H).  $^{13}C$  NMR (100 MHz,  $CDCl_3$ )  $\delta$  189.4, 162.6, 155.0, 142.8, 141.8, 141.3, 138.8, 135.5, 132.8, 131.2, 130.5, 129.2, 129.0, 128.7, 128.5, 128.1, 127.2, 127.0, 126.4, 62.7, 14.0. HRMS (ESI): Calculated for  $C_{23}H_{17}NO_3Na$   $[M+Na]^+$ : 378.1100; Found: 378.1100.

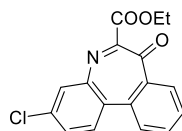

**Ethyl 3-chloro-7-oxo-7H-dibenzo[*b,d*]azepine-6-carboxylate (38).** Yellow solid (26.3 mg, 84% yield). Mp = 138.8 – 141.2 °C.  $^1H$  NMR (400 MHz,  $CDCl_3$ )  $\delta$  7.94 – 7.81 (m, 2H), 7.79 – 7.71 (m, 3H), 7.69 – 7.63 (m, 1H), 7.47 – 7.41 (m, 1H), 4.43 (q,  $J = 7.2$  Hz, 2H), 1.40 (t, 3H).  $^{13}C$  NMR (100 MHz,  $CDCl_3$ )  $\delta$  189.0, 162.3, 155.8, 143.2, 141.3, 134.8, 134.7, 132.9, 131.9, 130.2, 129.8, 129.5, 128.8, 128.4, 126.4, 62.9, 14.0. HRMS (ESI): Calculated for  $C_{17}H_{13}ClNO_3$   $[M+H]^+$ : 314.0578; Found: 314.0579.

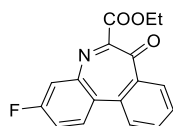

**Ethyl 3-fluoro-7-oxo-7H-dibenzo[*b,d*]azepine-6-carboxylate (39).** Yellow solid (14.3 mg, 48% yield). Mp = 196.2 – 198.8 °C.  $^1H$  NMR (400 MHz,  $CDCl_3$ )  $\delta$  7.88 (d,

$J = 7.9$  Hz, 1H), 7.80 – 7.73 (m, 3H), 7.68 – 7.61 (m, 1H), 7.56 – 7.51 (m, 1H), 7.25 – 7.17 (m, 1H), 4.43 (q,  $J = 7.1$  Hz, 2H), 1.40 (t,  $J = 7.1$  Hz, 3H).  $^{13}\text{C}$  NMR (100 MHz,  $\text{CDCl}_3$ )  $\delta$  189.1, 163.4, 162.2 (d,  $J = 250.7$  Hz), 155.7, 143.8 (d,  $J = 10.2$  Hz), 141.2, 135.0, 132.9, 132.6 (d,  $J = 8.8$  Hz), 129.2, 128.5, 128.1 (d,  $J = 3.6$  Hz), 127.0, 126.3, 116.3 (d,  $J = 22.2$  Hz), 62.9, 14.0.  $^{19}\text{F}$  NMR (376 MHz,  $\text{CDCl}_3$ )  $\delta$  -111.9. HRMS (ESI): Calculated for  $\text{C}_{17}\text{H}_{13}\text{FNO}_3$   $[\text{M}+\text{H}]^+$ : 298.0874; Found: 298.0882.

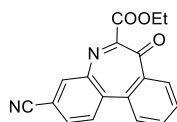

**Ethyl 3-cyano-7-oxo-7H-dibenzo[b,d]azepine-6-carboxylate (40).** Yellow solid (10.0 mg, 33% yield). Mp = 170.2 – 171.9 °C.  $^1\text{H}$  NMR (400 MHz,  $\text{CDCl}_3$ )  $\delta$  8.14 (d,  $J = 1.8$  Hz, 1H), 7.96 – 7.89 (m, 2H), 7.84 – 7.71 (m, 4H), 4.44 (q,  $J = 7.2$  Hz, 2H), 1.41 (t,  $J = 7.1$  Hz, 3H).  $^{13}\text{C}$  NMR (100 MHz,  $\text{CDCl}_3$ )  $\delta$  188.4, 162.0, 156.8, 142.8, 142.0, 135.9, 134.2, 134.1, 133.2, 131.9, 130.9, 130.6, 128.8, 126.6, 117.4, 112.9, 63.1, 14.0. HRMS (ESI) Calculated for  $\text{C}_{18}\text{H}_{12}\text{N}_2\text{O}_3\text{Na}$   $[\text{M}+\text{Na}]^+$ : 327.0740; Found: 327.0738.

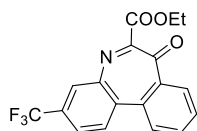

**Ethyl 7-oxo-3-(trifluoromethyl)-7H-dibenzo[b,d]azepine-6-carboxylate (41).** Yellow solid (14.5 mg, 42% yield). Mp = 180.0 – 182.2 °C.  $^1\text{H}$  NMR (400 MHz,  $\text{CDCl}_3$ )  $\delta$  8.13 (d,  $J = 1.8$  Hz, 1H), 7.94 (m, 2H), 7.84 – 7.76 (m, 2H), 7.74 – 7.69 (m, 2H), 4.44 (q,  $J = 7.2$  Hz, 2H), 1.41 (t,  $J = 7.1$  Hz, 3H).  $^{13}\text{C}$  NMR (100 MHz,  $\text{CDCl}_3$ )  $\delta$  188.7, 162.1, 156.2, 142.5, 141.9, 134.8, 134.5, 131.7 (d,  $J = 284.9$  Hz), 131.6, 131.2 (d,  $J = 33.6$  Hz), 129.9, 128.8, 127.7(m), 126.5, 124.8 (q,  $J = 3.8$  Hz), 124.7, 63.0, 14.1.  $^{19}\text{F}$  NMR (376 MHz,  $\text{CDCl}_3$ )  $\delta$  -62.7. HRMS (ESI) Calculated for  $\text{C}_{18}\text{H}_{12}\text{F}_3\text{NO}_3\text{Na}$   $[\text{M}+\text{Na}]^+$ : 370.0661; Found: 370.0676.

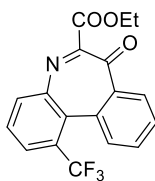

**Ethyl 7-oxo-1-(trifluoromethyl)-7H-dibenzo[*b,d*]azepine-6-carboxylate (42).**

Yellow liquid (10.7 mg, 31% yield).  $^1\text{H}$  NMR (400 MHz,  $\text{CDCl}_3$ )  $\delta$  7.93 (d,  $J = 8.1$  Hz, 1H), 7.80 (m, 2H), 7.69 – 7.57 (m, 4H), 4.40 (qd,  $J = 7.1, 2.1$  Hz, 2H), 1.38 (t,  $J = 7.1$  Hz, 3H).  $^{13}\text{C}$  NMR (100 MHz,  $\text{CDCl}_3$ )  $\delta$  190.8, 161.5, 158.2, 143.4 (d,  $J = 53.8$  Hz), 140.4, 137.9, 131.9 (d,  $J = 1.3$  Hz), 131.3 (d,  $J = 4.8$  Hz), 130.8, 130.5, 130.4, 130.4 (d,  $J = 1.5$  Hz), 129.4 (d,  $J = 131.8$  Hz), 127.7 (m), 125.2, 123.7, 63.0, 14.0.  $^{19}\text{F}$  NMR (376 MHz,  $\text{CDCl}_3$ )  $\delta$  -53.2. HRMS (ESI) Calculated for  $\text{C}_{18}\text{H}_{12}\text{F}_3\text{NO}_3\text{Na}$   $[\text{M}+\text{Na}]^+$ : 370.0661; Found: 370.0661.

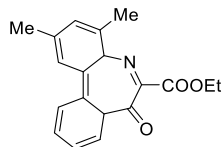

**Ethyl 2,4-dimethyl-7-oxo-4a,7a-dihydro-7H-dibenzo[*b,d*]azepine-6-carboxylate (43).**

Yellow solid (15.2 mg, 51% yield). Mp = 139.4 – 141.7 °C.  $^1\text{H}$  NMR (400 MHz,  $\text{CDCl}_3$ )  $\delta$  7.83 (d,  $J = 7.9$  Hz, 1H), 7.66 – 7.58 (m, 2H), 7.54 – 7.48 (m, 1H), 7.32 (s, 1H), 7.16 (s, 1H), 4.31 (q,  $J = 7.1$  Hz, 2H), 2.51 (s, 3H), 2.34 (s, 3H), 1.30 (t,  $J = 7.1$  Hz, 3H).  $^{13}\text{C}$  NMR (100 MHz,  $\text{CDCl}_3$ )  $\delta$  189.8, 162.5, 152.0, 141.6, 138.9, 138.4, 138.1, 136.3, 132.4, 131.6, 131.4, 129.0, 128.9, 128.8, 125.8, 62.3, 21.4, 19.1, 14.0. HRMS (ESI): Calculated for  $\text{C}_{19}\text{H}_{19}\text{NO}_3\text{Na}$   $[\text{M}+\text{Na}]^+$ : 330.1100; Found: 330.1105.

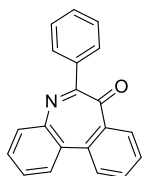

**6-Phenyl-7H-dibenzo[*b,d*]azepin-7-one (44).** Yellow solid (6.8 mg, 26% yield).

Mp = 174.6 – 176.8 °C.  $^1\text{H}$  NMR (400 MHz,  $\text{CDCl}_3$ )  $\delta$  8.04 – 7.95 (m, 2H), 7.85 (d,

$J = 8.1$  Hz, 1H), 7.70 – 7.59 (m, 4H), 7.54 – 7.49 (m, 1H), 7.48 – 7.43 (m, 1H), 7.42 – 7.36 (m, 3H), 7.32 – 7.26 (m, 1H).  $^{13}\text{C}$  NMR (100 MHz,  $\text{CDCl}_3$ )  $\delta$  193.7, 162.5, 144.3, 142.2, 136.2, 134.2, 132.2, 131.3, 130.5, 130.4, 129.4, 128.8, 128.7, 128.6, 128.5, 128.1, 126.4, 125.2. HRMS (ESI): Calculated for  $\text{C}_{20}\text{H}_{14}\text{NO}$   $[\text{M}+\text{H}]^+$ : 284.1070; Found: 284.1077.

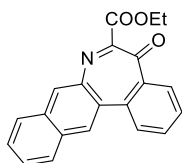

**Ethyl 5-oxo-5H-benzo[d]naphtho[2,3-b]azepine-6-carboxylate (45).** Yellow solid (22.0 mg, 68% yield). Mp = 140.2 – 142.4 °C.  $^1\text{H}$  NMR (400 MHz,  $\text{CDCl}_3$ )  $\delta$  8.77 (d,  $J = 8.4$  Hz, 1H), 7.97 (d,  $J = 8.0$  Hz, 1H), 7.82 – 7.72 (m, 4H), 7.71 – 7.66 (m, 1H), 7.62 – 7.52 (m, 3H), 4.38 (q,  $J = 7.2$  Hz, 2H), 1.35 (t,  $J = 7.1$  Hz, 3H).  $^{13}\text{C}$  NMR (100 MHz,  $\text{CDCl}_3$ )  $\delta$  188.6, 162.4, 152.2, 141.6, 138.3, 135.9, 133.0, 132.5, 130.9, 129.3, 129.1, 129.1, 127.8, 127.7, 127.5, 127.4, 127.2, 126.0, 125.4, 62.6, 14.1. HRMS (ESI): Calculated for  $\text{C}_{21}\text{H}_{16}\text{NO}_3$   $[\text{M}+\text{H}]^+$ : 330.1125; Found: 330.1136.

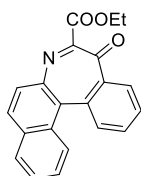

**Ethyl 9-oxo-9H-benzo[d]naphtho[2,1-b]azepine-8-carboxylate (46).** Yellow solid (21.7 mg, 66% yield). Mp = 162.0 – 164.6 °C.  $^1\text{H}$  NMR (400 MHz,  $\text{CDCl}_3$ )  $\delta$  8.05 (d,  $J = 8.6$  Hz, 1H), 7.99 – 7.93 (m, 2H), 7.93 – 7.88 (m, 1H), 7.84 (d,  $J = 8.8$  Hz, 1H), 7.75 – 7.67 (m, 3H), 7.57 – 7.51 (m, 1H), 7.50 – 7.45 (m, 1H), 4.43 (q,  $J = 7.1$  Hz, 2H), 1.41 (t,  $J = 7.1$  Hz, 3H).  $^{13}\text{C}$  NMR (100 MHz,  $\text{CDCl}_3$ )  $\delta$  190.6, 161.9, 155.3, 143.6, 140.4, 133.1, 132.8, 131.8, 131.6, 130.3, 129.6, 129.5, 128.4, 128.2, 127.8, 126.9, 126.9, 126.3, 124.3, 62.8, 14.0. HRMS (ESI): Calculated for  $\text{C}_{21}\text{H}_{16}\text{NO}_3$   $[\text{M}+\text{H}]^+$ : 330.1125; Found: 330.1128.



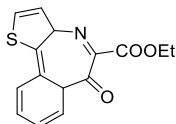

**Ethyl 6-oxo-3a,6a-dihydro-6H-benzo[d]thieno[3,2-b]azepine-5-carboxylate (47).**

Yellow solid (17.4 mg, 62% yield). Mp = 139.3 – 140.7 °C. <sup>1</sup>H NMR (400 MHz, CDCl<sub>3</sub>) δ 7.95 (d, *J* = 7.8 Hz, 1H), 7.86 (d, *J* = 8.1 Hz, 1H), 7.65 (t, *J* = 7.6 Hz, 1H), 7.56 (t, 1H), 7.43 (d, *J* = 5.5 Hz, 1H), 7.36 (d, *J* = 5.4 Hz, 1H), 4.37 (q, *J* = 7.1 Hz, 2H), 1.32 (t, *J* = 7.1 Hz, 4H). <sup>13</sup>C NMR (100 MHz, CDCl<sub>3</sub>) δ 185.4, 164.6, 151.8, 143.3, 137.0, 136.3, 133.8, 131.4, 131.3, 130.1, 129.3, 127.4, 125.0, 62.5, 14.0. HRMS (ESI): Calculated for C<sub>15</sub>H<sub>13</sub>NO<sub>3</sub>SNa [M+Na]<sup>+</sup>: 308.0352; Found: 308.0351.

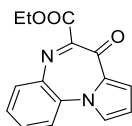

**Ethyl 7-oxo-7H-benzo[b]pyrrolo[1,2-d][1,4]diazepine-6-carboxylate (48).** Yellow solid (15.8 mg, 60% yield). Mp = 120.8 – 122.2 °C. <sup>1</sup>H NMR (400 MHz, CDCl<sub>3</sub>) δ 7.85 – 7.77 (m, 1H), 7.73 – 7.67 (m, 1H), 7.54 – 7.41 (m, 3H), 7.32 – 7.27 (m, 1H), 6.73 – 6.67 (m, 1H), 4.44 (q, *J* = 7.2 Hz, 2H), 1.40 (t, *J* = 7.2 Hz, 3H). <sup>13</sup>C NMR (100 MHz, CDCl<sub>3</sub>) δ 172.9, 164.5, 155.2, 139.9, 135.1, 133.8, 133.1, 131.1, 127.2, 127.0, 122.5, 119.5, 114.7, 62.4, 14.0. HRMS (ESI): Calculated for C<sub>15</sub>H<sub>13</sub>N<sub>2</sub>O<sub>3</sub> [M+H]<sup>+</sup>: 269.0921; Found: 269.0927.

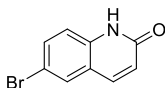

**6-Bromoquinolin-2(1H)-one (49).** Colorless solid (8.0 mg, 36% yield). Mp = 244.9 – 246.3 °C. <sup>1</sup>H NMR (400 MHz, DMSO-*d*<sub>6</sub>) δ 11.87 (s, 1H), 7.93 – 7.82 (m, 2H), 7.68 – 7.57 (m, 1H), 7.24 (d, *J* = 8.8 Hz, 1H), 6.54 (d, *J* = 9.5 Hz, 1H). <sup>13</sup>C NMR (100 MHz, DMSO-*d*<sub>6</sub>) δ 161.7, 139.1, 137.9, 132.8, 129.9, 123.1, 120.8, 117.3, 113.3. HRMS (ESI): Calculated for C<sub>9</sub>H<sub>5</sub>BrNO [M-H]<sup>-</sup>: 221.9549; Found: 221.9536.

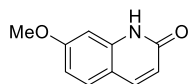

**7-Methoxyquinolin-2(1H)-one (50).** Colorless solid (6.6 mg, 38% yield). Mp = 216.8 – 217.9 °C. <sup>1</sup>H NMR (400 MHz, DMSO-*d*<sub>6</sub>) δ 11.60 (s, 1H), 7.80 (d, *J* = 9.5 Hz, 1H), 7.55 (d, *J* = 8.3 Hz, 1H), 6.82 – 6.76 (m, 2H), 6.30 (d, *J* = 9.4 Hz, 1H), 3.80 (s, 3H). <sup>13</sup>C NMR (100 MHz, DMSO-*d*<sub>6</sub>) δ 162.2, 161.0, 140.7, 140.0, 129.3, 118.6, 113.3, 110.6, 98.0, 55.3. HRMS (ESI): Calculated for C<sub>10</sub>H<sub>8</sub>NO<sub>2</sub> [M-H]<sup>-</sup>: 174.0550; Found: 174.0538.

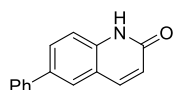

**6-Phenylquinolin-2(1H)-one (51).** Colorless solid (9.0 mg, 41% yield). Mp = 272.9 – 273.4 °C. <sup>1</sup>H NMR (400 MHz, DMSO-*d*<sub>6</sub>) δ 11.83 (s, 1H), 7.97 (d, *J* = 11.0 Hz, 2H), 7.83 (d, *J* = 8.6 Hz, 1H), 7.70 (d, *J* = 8.8 Hz, 2H), 7.47 (t, *J* = 6.9 Hz, 2H), 7.42 – 7.31 (m, 2H), 6.54 (d, *J* = 9.5 Hz, 1H). <sup>13</sup>C NMR (100 MHz, DMSO-*d*<sub>6</sub>) δ 161.9, 140.4, 139.3, 138.3, 133.7, 129.0, 127.2, 126.4, 125.6, 122.3, 119.5, 115.7. HRMS (ESI): Calculated for C<sub>15</sub>H<sub>10</sub>NO [M-H]<sup>-</sup>: 220.0757; Found: 220.0745.

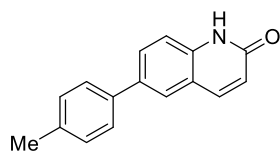

**6-(*p*-Tolyl)quinolin-2(1H)-one (52).** Colorless solid (9.5 mg, 42% yield). Mp = 304.4 – 305.7 °C. <sup>1</sup>H NMR (400 MHz, DMSO-*d*<sub>6</sub>) δ 11.81 (s, 1H), 8.01 – 7.89 (m, 2H), 7.80 (m, 1H), 7.58 (d, *J* = 8.2 Hz, 2H), 7.37 (d, *J* = 8.6 Hz, 1H), 7.27 (d, *J* = 8.0 Hz, 2H), 6.53 (d, *J* = 9.6 Hz, 1H), 2.33 (s, 3H). <sup>13</sup>C NMR (100 MHz, DMSO-*d*<sub>6</sub>) δ 162.0, 140.4, 138.1, 136.5, 136.5, 133.6, 129.6, 128.8, 126.3, 125.3, 122.3, 119.5, 115.7, 20.7. HRMS (ESI): Calculated for C<sub>16</sub>H<sub>13</sub>NONa [M+Na]<sup>+</sup>: 258.0889; Found: 258.0873.

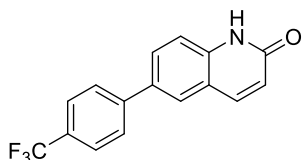

**6-(4-((Difluoro- $\lambda^3$ -methyl)- $\lambda^2$ -fluoranyl)phenyl)quinolin-2(1H)-one (53).**

Colorless solid (18.8 mg, 65% yield). Mp = 281.3 – 282.7 °C.  $^1\text{H}$  NMR (400 MHz, DMSO- $d_6$ )  $\delta$  11.91 (s, 1H), 8.06 – 7.75 (m, 7H), 7.41 (d,  $J$  = 8.6 Hz, 1H), 6.55 (d,  $J$  = 9.6 Hz, 1H).  $^{13}\text{C}$  NMR (100 MHz, DMSO- $d_6$ )  $\delta$  162.0, 143.3, 140.4, 139.0, 133.0, 129.1, 128.9, 127.6 (d,  $J$  = 31.7 Hz), 127.1, 126.3, 125.8 (q,  $J$  = 4.0 Hz), 123.1, 121.0 (d,  $J$  = 301.1 Hz), 116.0.  $^{19}\text{F}$  NMR (376 MHz, DMSO- $d_6$ )  $\delta$  -60.8. HRMS (ESI): Calculated for  $\text{C}_{16}\text{H}_{10}\text{NOF}_3\text{Na}$   $[\text{M}+\text{Na}]^+$ : 312.0606; Found: 312.0606.

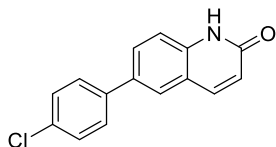

**6-(4-Chlorophenyl)quinolin-2(1H)-one (54).** Colorless solid (16.3 mg, 64% yield).

Mp = 307.5 – 308.2 °C.  $^1\text{H}$  NMR (400 MHz, DMSO- $d_6$ )  $\delta$  11.85 (s, 1H), 8.00 (d,  $J$  = 2.2 Hz, 1H), 7.96 (d,  $J$  = 9.5 Hz, 1H), 7.84 – 7.81 (m, 1H), 7.72 (d,  $J$  = 8.6 Hz, 2H), 7.52 (d,  $J$  = 8.5 Hz, 2H), 7.38 (d,  $J$  = 8.6 Hz, 1H), 6.54 (d,  $J$  = 9.5 Hz, 1H).  $^{13}\text{C}$  NMR (100 MHz, DMSO- $d_6$ )  $\delta$  162.0, 140.4, 138.5, 138.2, 132.3, 132.1, 128.9, 128.8, 128.2, 125.7, 122.4, 119.5, 115.8. HRMS (ESI): Calculated for  $\text{C}_{15}\text{H}_{10}\text{ClN}$   $[\text{M}+\text{Na}]^+$ : 278.0343; Found: 278.0327.

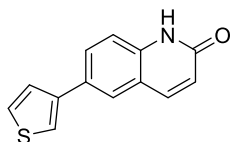

**6-(Thiophen-3-yl)quinolin-2(1H)-one (55).** Colorless solid (6.6 mg, 29% yield).

Mp = 280.3 – 281.9 °C.  $^1\text{H}$  NMR (400 MHz, DMSO- $d_6$ )  $\delta$  11.79 (s, 1H), 8.02 (d,  $J$  = 2.0 Hz, 1H), 7.91 (d,  $J$  = 9.3 Hz, 1H), 7.88 (m, 1H), 7.85 (m, 1H), 7.66 (m, 1H), 7.58 (m, 1H), 7.33 (d,  $J$  = 8.5 Hz, 1H), 6.53 (d,  $J$  = 9.5 Hz, 1H).  $^{13}\text{C}$  NMR (100 MHz, DMSO- $d_6$ )  $\delta$  161.9, 140.7, 140.3, 138.0, 129.0, 128.6, 127.2, 126.1, 124.9, 122.4,

120.3, 119.4, 115.6. HRMS (ESI): Calculated for  $C_{13}H_9NOSNa$   $[M+Na]^+$ : 250.0297;  
Found: 250.0285.

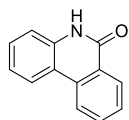

**Phenanthridin-6(5H)-one (56).**<sup>9</sup> Colorless solid (10.3 mg, 53% yield). Mp = 280.6 – 282.2 °C.  $^1H$  NMR (400 MHz, DMSO- $d_6$ )  $\delta$  11.70 (s, 1H), 8.51 (d,  $J$  = 8.3 Hz, 1H), 8.39 (d,  $J$  = 8.0 Hz, 1H), 8.32 (d,  $J$  = 7.9 Hz, 1H), 7.85 (t,  $J$  = 7.5 Hz, 1H), 7.64 (t,  $J$  = 7.6 Hz, 1H), 7.49 (t,  $J$  = 7.6 Hz, 1H), 7.36 (d,  $J$  = 8.2 Hz, 1H), 7.26 (t,  $J$  = 7.6 Hz, 1H).  $^{13}C$  NMR (100 MHz, DMSO- $d_6$ )  $\delta$  160.8, 136.6, 134.3, 132.8, 129.6, 127.9, 127.5, 125.7, 123.3, 122.6, 122.3, 117.6, 116.1. HRMS (ESI): Calculated for  $C_{13}H_9NONa$   $[M+Na]^+$ : 218.0576; Found: 218.0576.

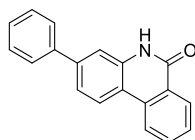

**3-Phenylphenanthridin-6(5H)-one (57).** Colorless solid (11.7 mg, 43% yield). Mp > 320 °C.  $^1H$  NMR (400 MHz, DMSO- $d_6$ )  $\delta$  11.77 (s, 1H), 8.51 (d,  $J$  = 8.2 Hz, 1H), 8.44 (d,  $J$  = 8.4 Hz, 1H), 8.33 (d,  $J$  = 8.0 Hz, 1H), 7.86 (t,  $J$  = 7.6 Hz, 1H), 7.70 (d,  $J$  = 7.7 Hz, 2H), 7.64 (d,  $J$  = 7.0 Hz, 2H), 7.55 – 7.49 (m, 3H), 7.43 (d,  $J$  = 7.2 Hz, 1H).  $^{13}C$  NMR (100 MHz, DMSO- $d_6$ )  $\delta$  161.0, 141.2, 139.3, 137.1, 134.0, 132.9, 129.1, 128.1, 128.0, 127.5, 126.7, 125.6, 124.0, 122.7, 120.9, 116.9, 113.8. HRMS (ESI): Calculated for  $C_{19}H_{13}NONa$   $[M+Na]^+$ : 294.0889; Found: 294.0890.

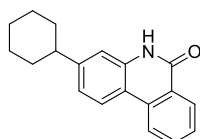

**3-Cyclohexylphenanthridin-6(5H)-one (58).** Colorless solid (11.1 mg, 40% yield). Mp = 277.8 – 279.4 °C.  $^1H$  NMR (400 MHz, DMSO- $d_6$ )  $\delta$  11.62 (s, 1H), 8.43 (d,  $J$  = 8.0 Hz, 1H), 8.31 – 8.24 (m, 2H), 7.81 (t,  $J$  = 7.6 Hz, 1H), 7.59 (t,  $J$  = 7.5 Hz, 1H),

7.18 (s, 1H), 7.12 (d,  $J = 8.3$  Hz, 1H), 2.55 (d,  $J = 11.0$  Hz, 1H), 1.84 – 1.78 (m, 4H), 1.43 – 1.34 (m, 4H), 1.22 (d,  $J = 17.5$  Hz, 2H).  $^{13}\text{C}$  NMR (100 MHz,  $\text{DMSO-}d_6$ )  $\delta$  161.0, 149.3, 136.6, 134.4, 132.7, 127.4, 127.3, 125.3, 123.2, 122.4, 121.3, 115.6, 113.7, 43.6, 33.8, 26.2, 25.6. HRMS (ESI): Calculated for  $\text{C}_{19}\text{H}_{19}\text{NONa}$   $[\text{M}+\text{Na}]^+$ : 300.1359; Found: 300.1359.

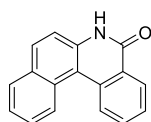

**Benzo[a]phenanthridin-5(6H)-one (59).**<sup>11</sup> Colorless solid (8.3 mg, 34%). Mp = 296.5 – 298.0 °C.  $^1\text{H}$  NMR (400 MHz,  $\text{DMSO-}d_6$ )  $\delta$  12.00 (s, 1H), 8.79 (t,  $J = 8.4$  Hz, 2H), 8.48 – 8.41 (m, 1H), 8.05 – 8.00 (m, 2H), 7.95 – 7.90 (m, 1H), 7.7 yield 1 – 7.66 (m, 2H), 7.57 – 7.50 (m, 2H).  $^{13}\text{C}$  NMR (100 MHz,  $\text{DMSO-}d_6$ )  $\delta$  160.8, 135.7, 134.6, 132.5, 130.7, 130.4, 129.4, 129.2, 129.0, 127.7, 127.7, 127.2, 126.7, 124.9, 124.4, 117.0, 110.9. HRMS (ESI): Calculated for  $\text{C}_{17}\text{H}_{11}\text{NONa}$   $[\text{M}+\text{Na}]^+$ : 268.0733; Found: 268.0733.

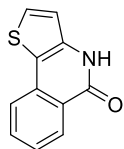

**Thieno[3,2-c]isoquinolin-5(4H)-one (60).** Colorless solid (6.4 mg, 32% yield). Mp = 256.7 – 258.9 °C.  $^1\text{H}$  NMR (400 MHz,  $\text{DMSO-}d_6$ )  $\delta$  12.02 (s, 1H), 8.27 (d,  $J = 8.0$  Hz, 1H), 7.82 – 7.73 (m, 3H), 7.52 (m 1H), 7.06 (d,  $J = 5.3$  Hz, 1H).  $^{13}\text{C}$  NMR (100 MHz,  $\text{DMSO-}d_6$ )  $\delta$  161.4, 138.4, 133.2, 133.1, 128.2, 127.8, 126.4, 123.6, 122.4, 118.0, 115.0. HRMS (ESI): Calculated for  $\text{C}_{11}\text{H}_7\text{NOSNa}$   $[\text{M}+\text{Na}]^+$ : 224.0140; Found: 224.0127.

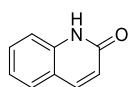

**Quinolin-2(1*H*)-one (61).**<sup>9</sup> Colorless solid. Mp = 234.6 – 236.5 °C. <sup>1</sup>H NMR (400 MHz, CDCl<sub>3</sub>) δ 12.87 (s, 1H), 7.74 (d, *J* = 9.4 Hz, 1H), 7.51 – 7.38 (m, 3H), 7.19 – 7.09 (m, 1H), 6.66 (d, *J* = 9.4 Hz, 1H). <sup>13</sup>C NMR (100 MHz, CDCl<sub>3</sub>) δ 164.8, 141.1, 138.4, 130.6, 127.7, 122.7, 121.1, 119.9, 116.3. HRMS (ESI): Calculated for C<sub>9</sub>H<sub>6</sub>NO [M-H]<sup>-</sup>: 144.0443; Found: 144.0443.

## 6. References

1. Y.-M. Zhou, Y.-J. Ping, Z.-J. Xu and C.-M. Che, *Asian. J. Org. Chem.*, 2021, **10**, 674.
2. Y.-T. Jiang, Z.-Z. Yu, Y.-K. Zhang and B. Wang, *Org. Lett.*, 2018, **20**, 3728.
3. Q. Yin, S.-G. Wang, X.-W. Liang, D.-W. Ga, J. Zheng and S.-L. You, *Chem. Sci.*, 2015, **6**, 4179.
4. N. Otto and T. Opatz, *Beilstein J. Org. Chem.*, 2012, **8**, 1105.
5. Y. He, J. Tang, M. Luo and X. Zeng, *Org. Lett.*, 2018, **20**, 4159.
6. J.-D. Guo, X.-L. Yang, B. Chen, C.-H. Tung and L.-Z. Wu, *Green. Chem.*, 2021, **23**, 7193.
7. R. Mei, C. Yang, F. Xiong, M. Mao, H. Li, J. Sun, L. Zou, W. Ma and L. Ackermann, *Adv. Synth. Cata.*, 2020, **363**, 1120.
8. Y. Xia, P. Qu, Z. Liu, R. Ge, Q. Xiao, Y. Zhang and J. Wang, *Angew. Chem. Int. Ed.*, 2013, **52**, 2543.
9. A. R. Todorov, T. Wirtanen and J. Helaja, *J. Org. Chem.*, 2017, **82**, 13756.
10. Z. Chen and X. Wang, *Org. Biomol. Chem.*, 2017, **15**, 5790.
11. T. Truong and O. Daugulis, *Chem. Sci.*, 2013, **4**, 531.

## 7. Spectra of Compounds

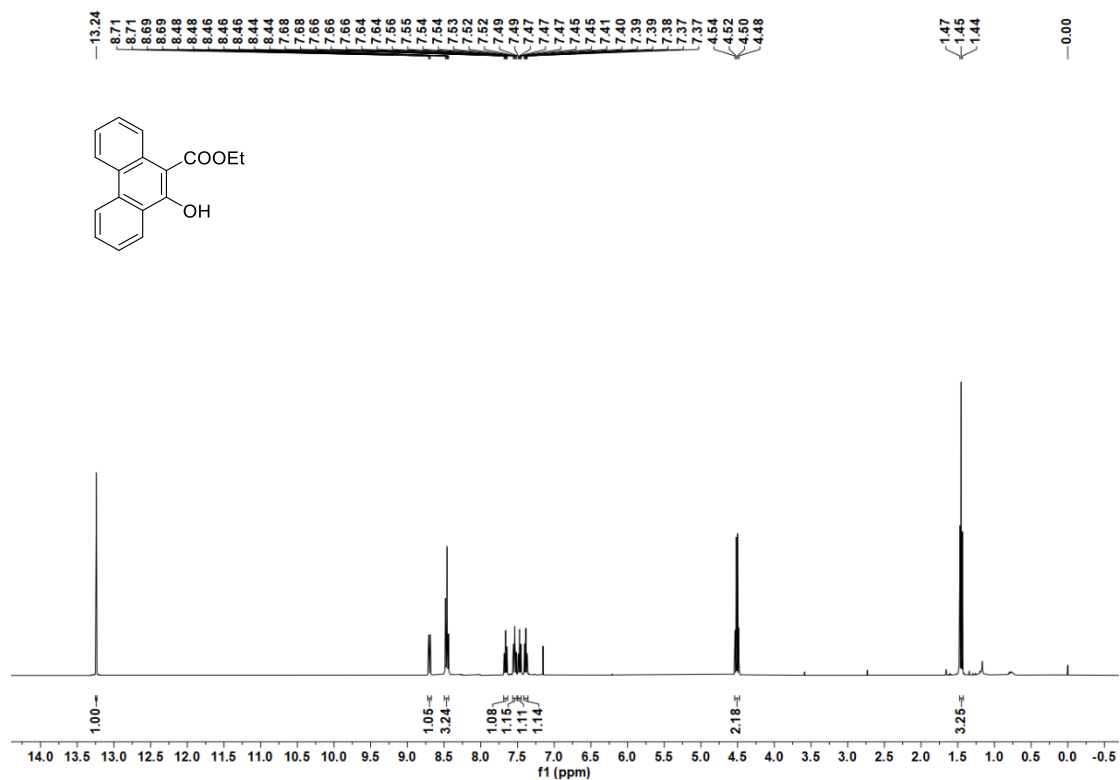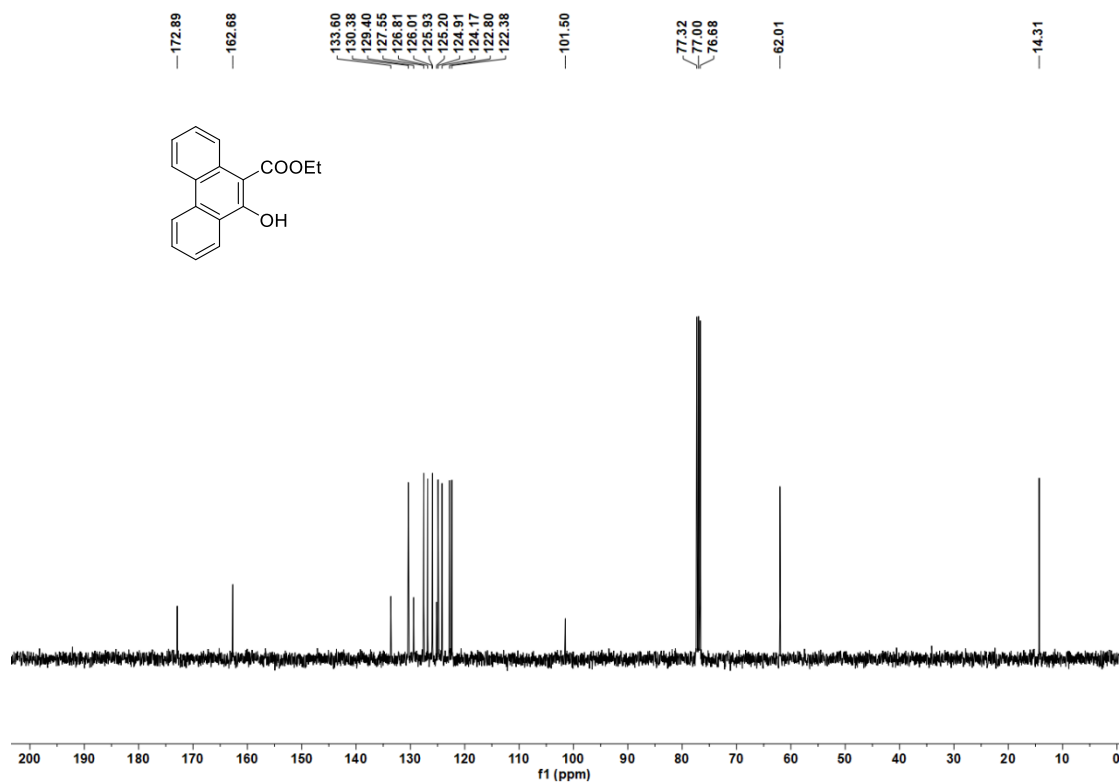

**<sup>1</sup>H-NMR (400 MHz, CDCl<sub>3</sub>), <sup>13</sup>C NMR (101 MHz, CDCl<sub>3</sub>) of 1a**



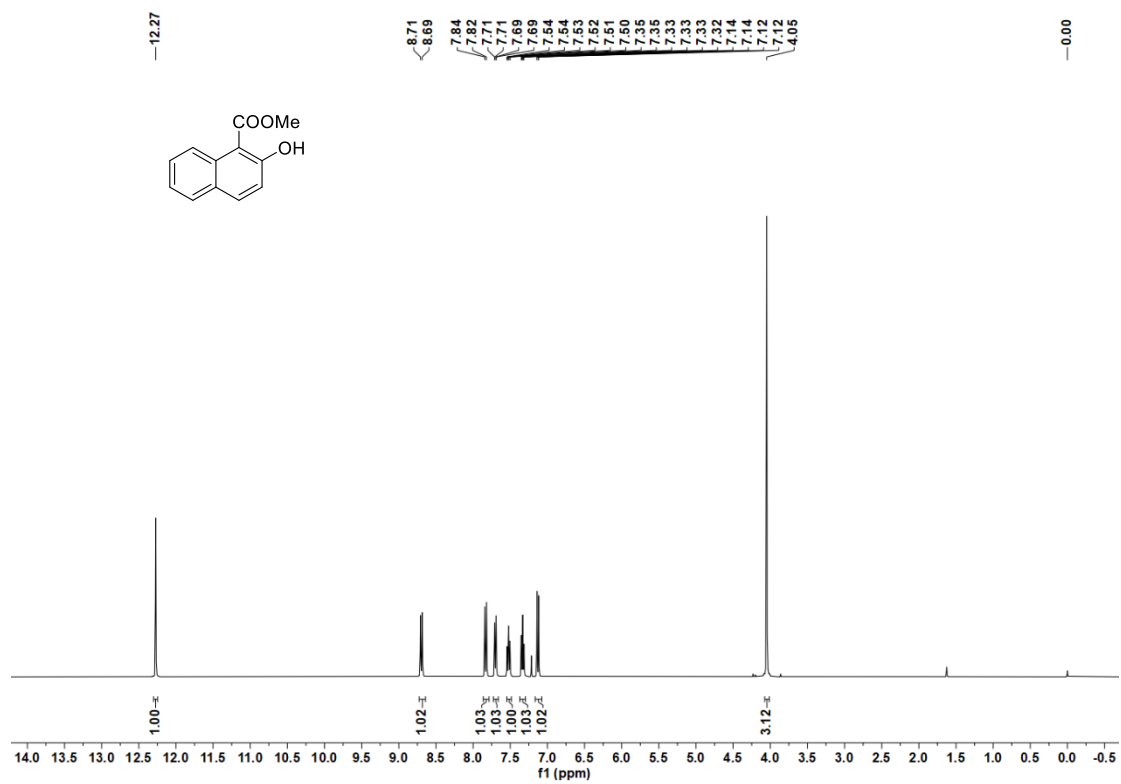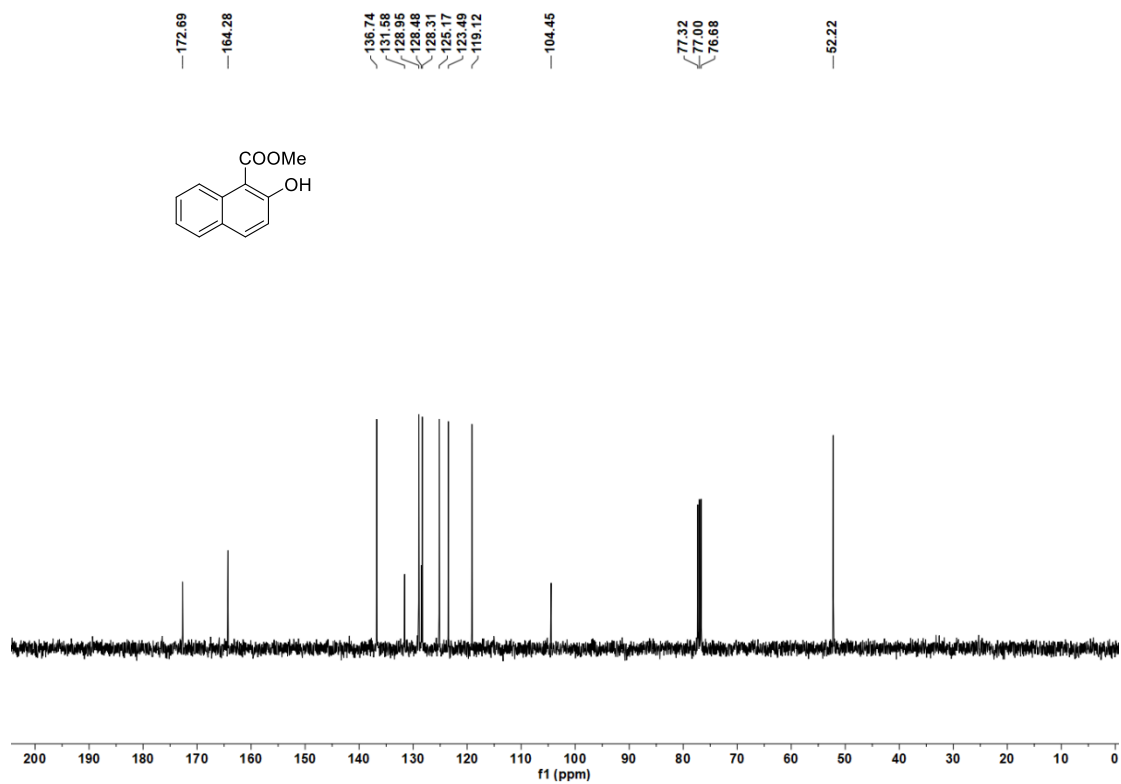

$^1\text{H-NMR}$  (400 MHz,  $\text{CDCl}_3$ ),  $^{13}\text{C-NMR}$  (101 MHz,  $\text{CDCl}_3$ ) of **2a**

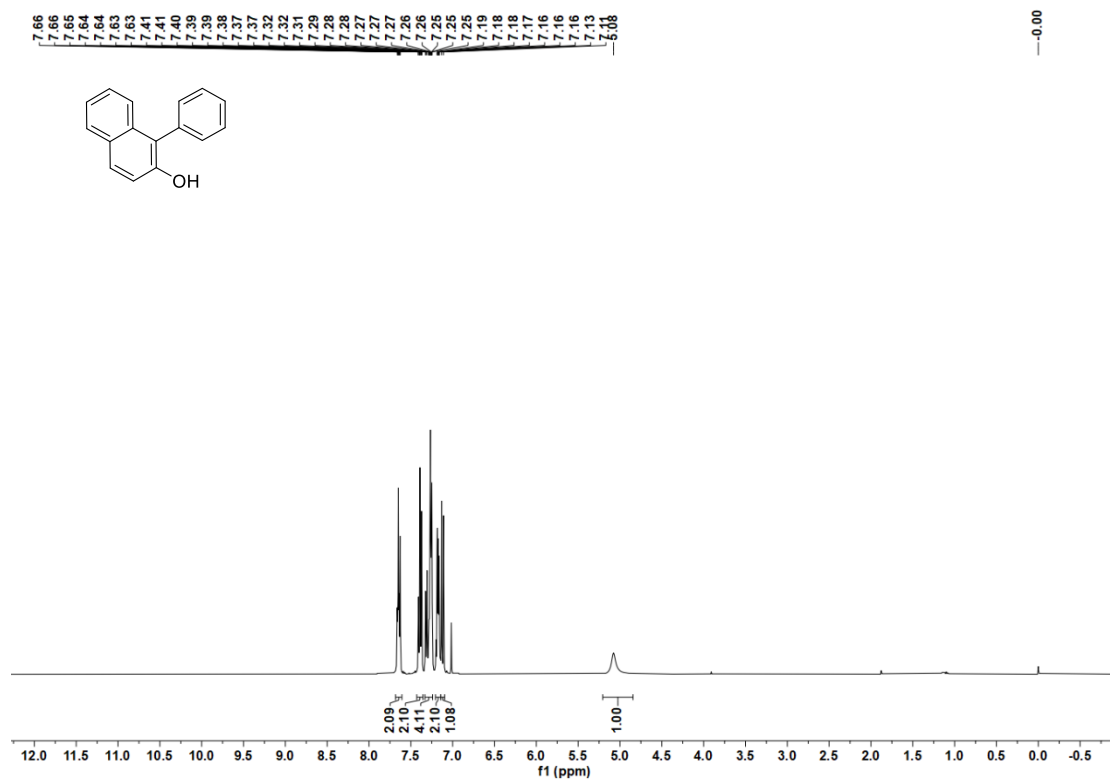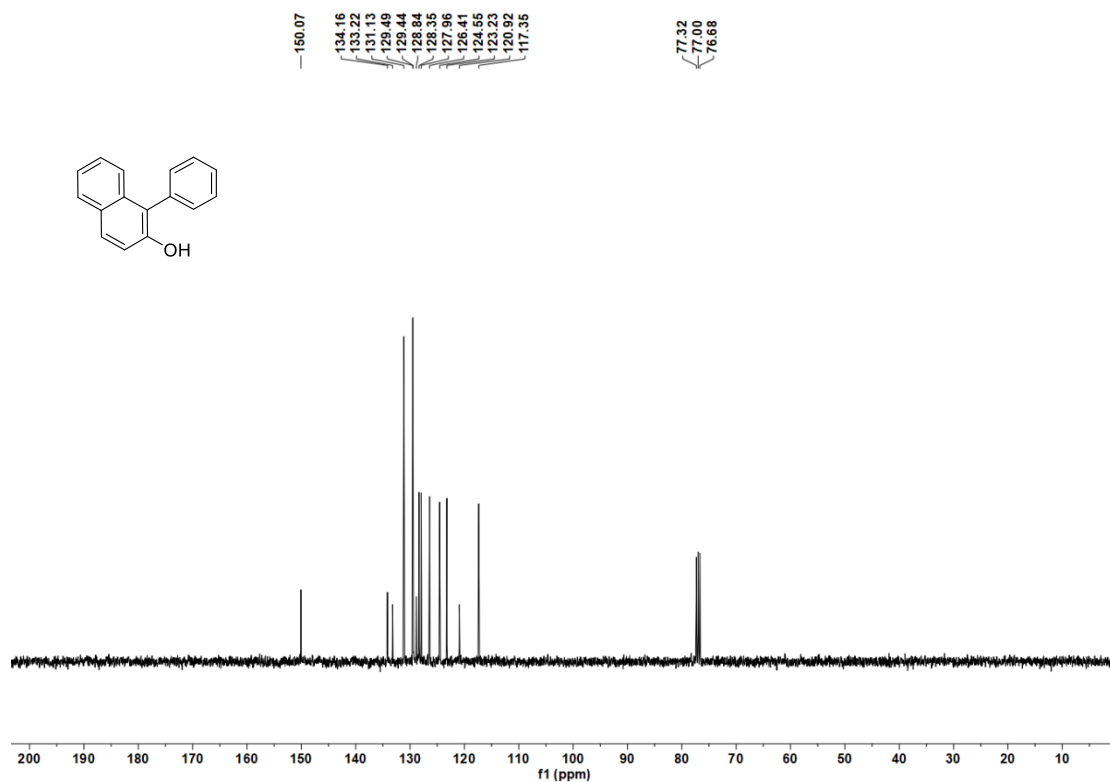

<sup>1</sup>H-NMR (400 MHz, CDCl<sub>3</sub>), <sup>13</sup>C NMR (101 MHz, CDCl<sub>3</sub>) of **3a**

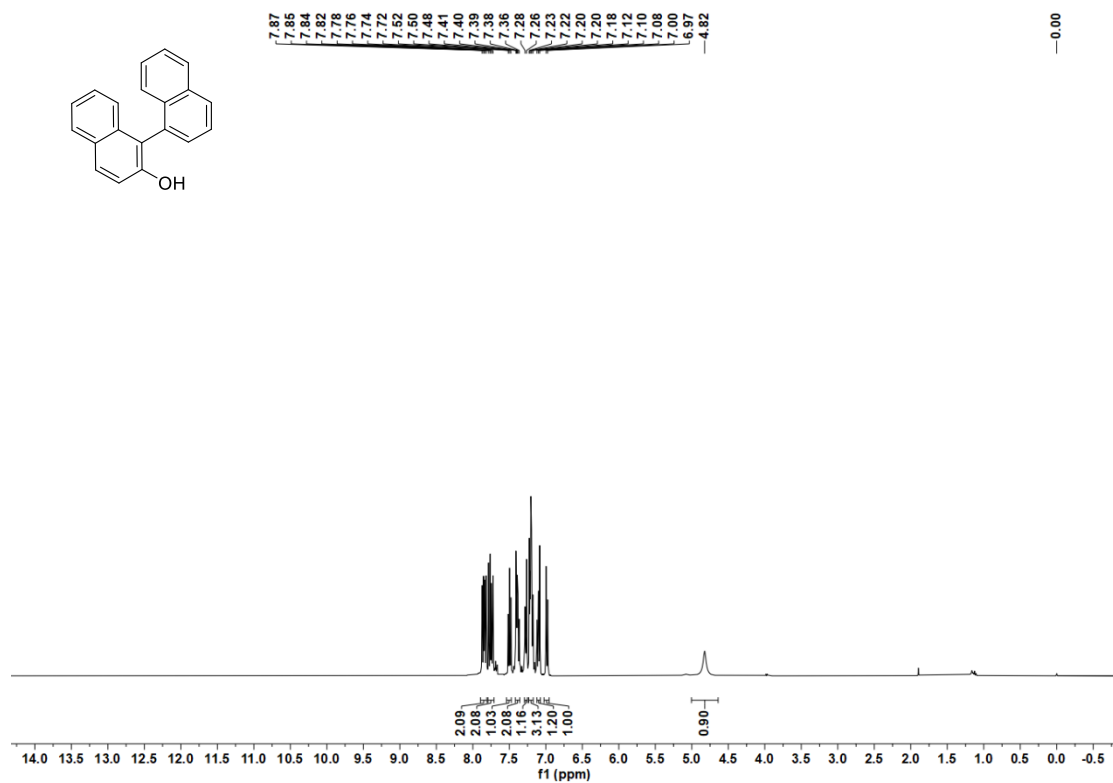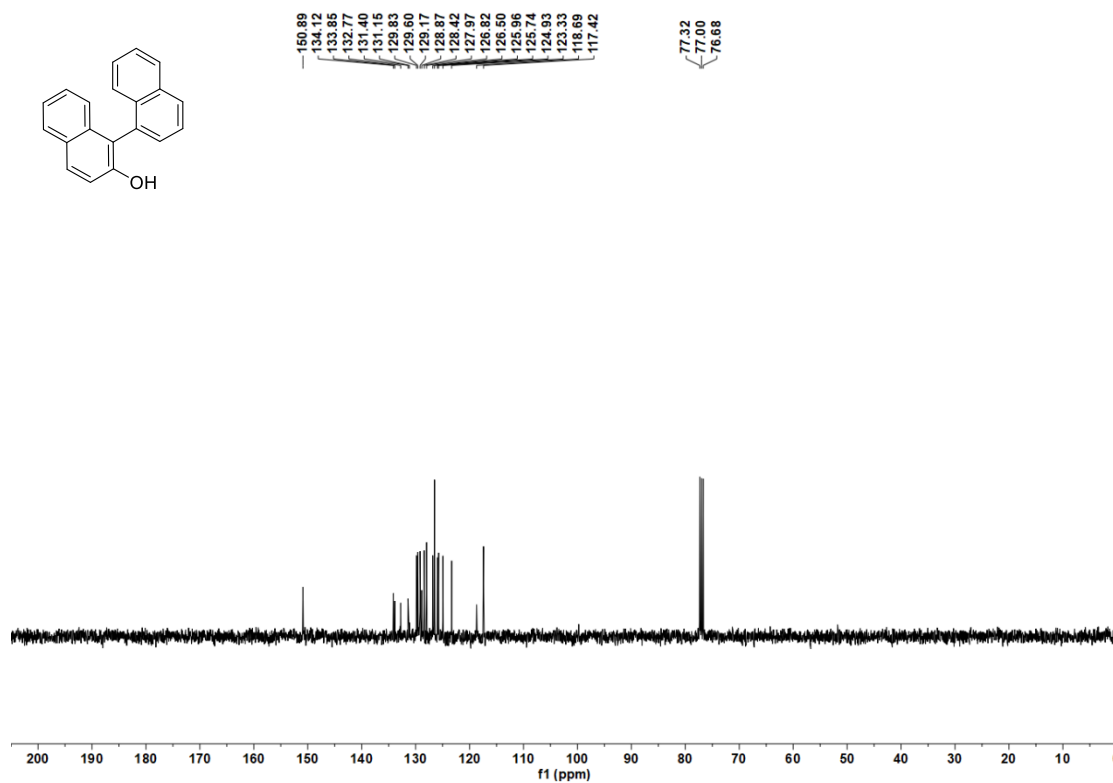

$^1\text{H-NMR}$  (400 MHz,  $\text{CDCl}_3$ ),  $^{13}\text{C-NMR}$  (101 MHz,  $\text{CDCl}_3$ ) of **4a**

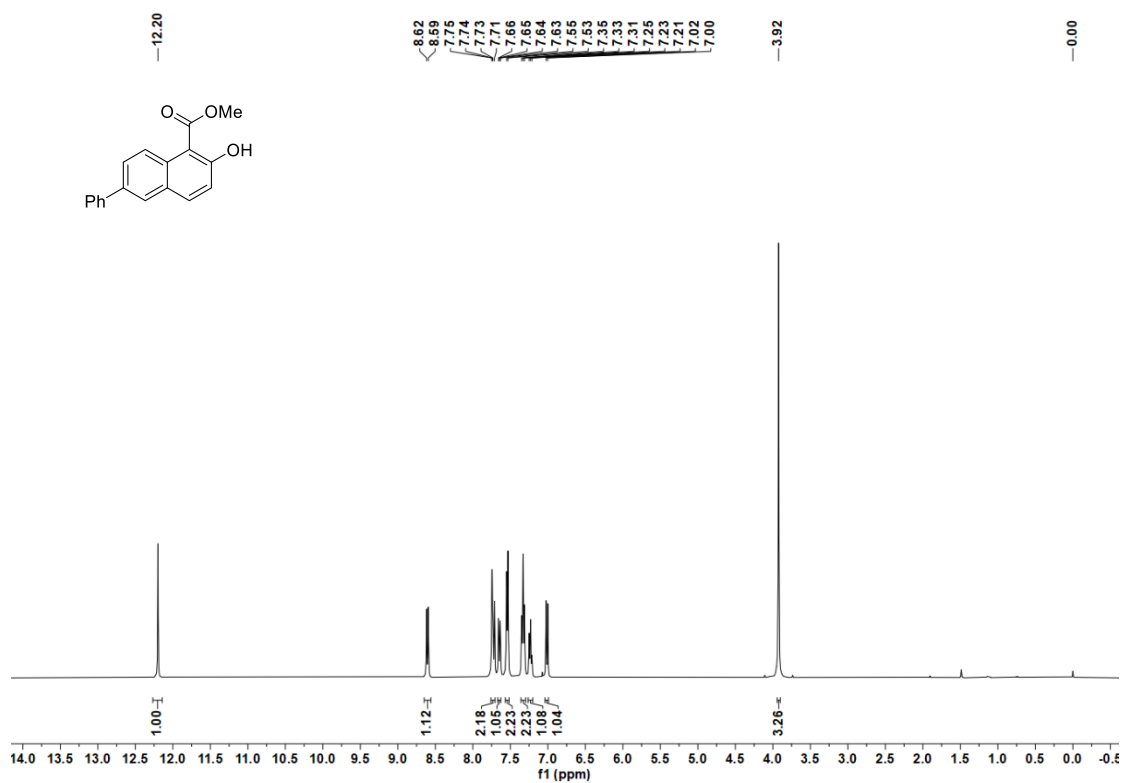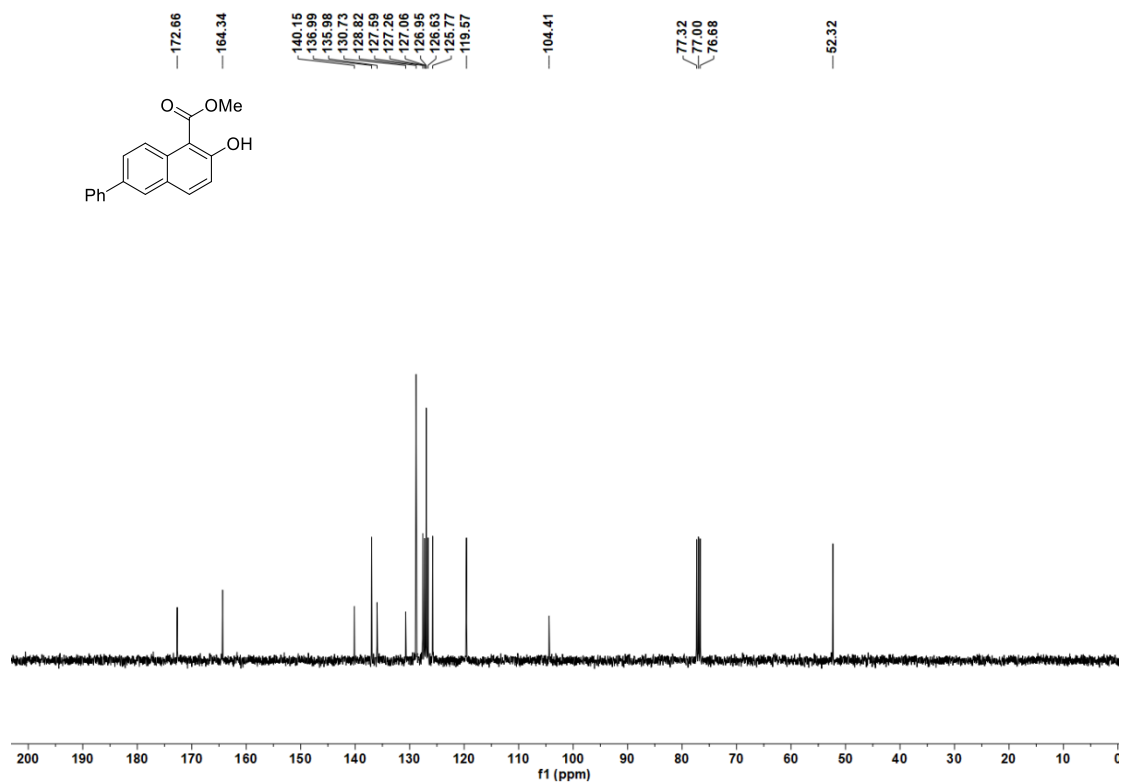

$^1\text{H-NMR}$  (400 MHz,  $\text{CDCl}_3$ ),  $^{13}\text{C-NMR}$  (101 MHz,  $\text{CDCl}_3$ ) of **5a**

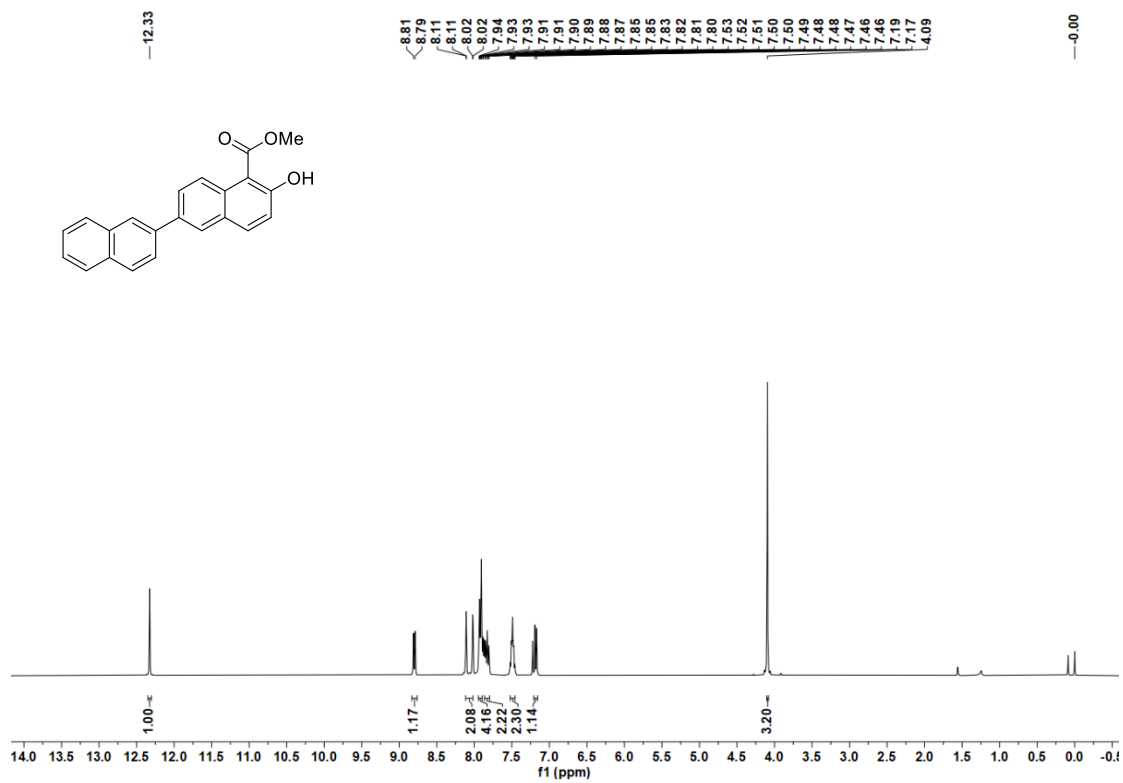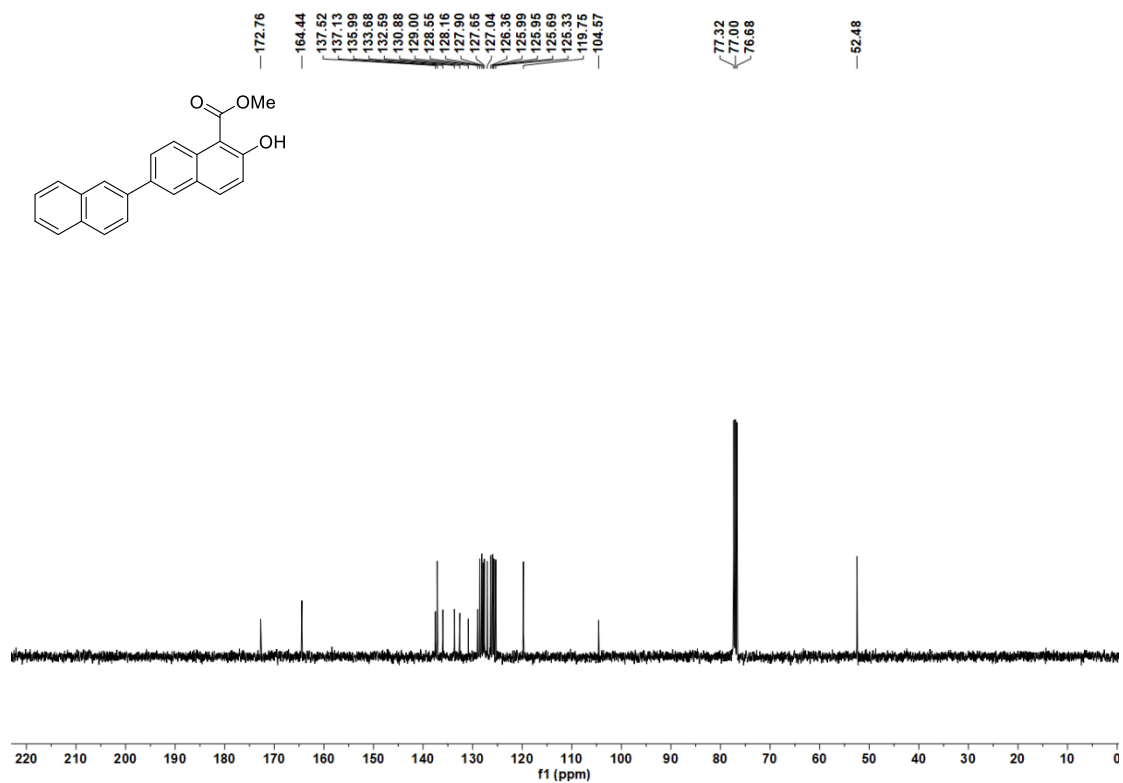

<sup>1</sup>H-NMR (400 MHz, CDCl<sub>3</sub>), <sup>13</sup>C NMR (101 MHz, CDCl<sub>3</sub>) of **6a**

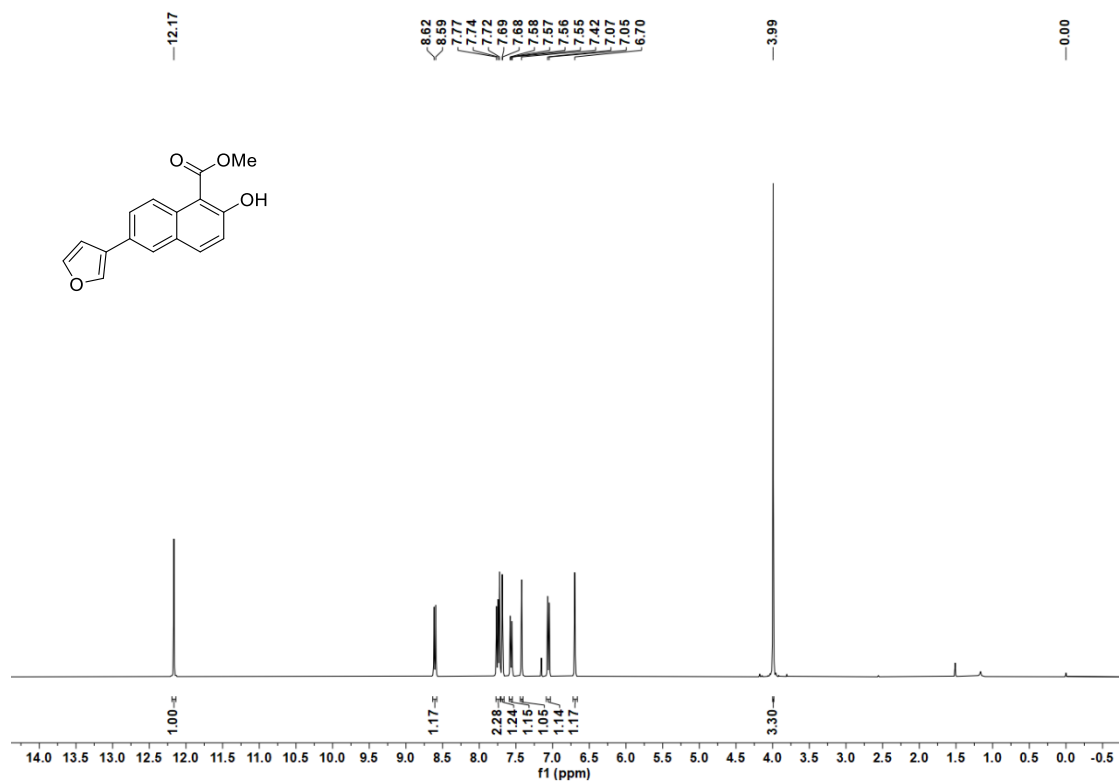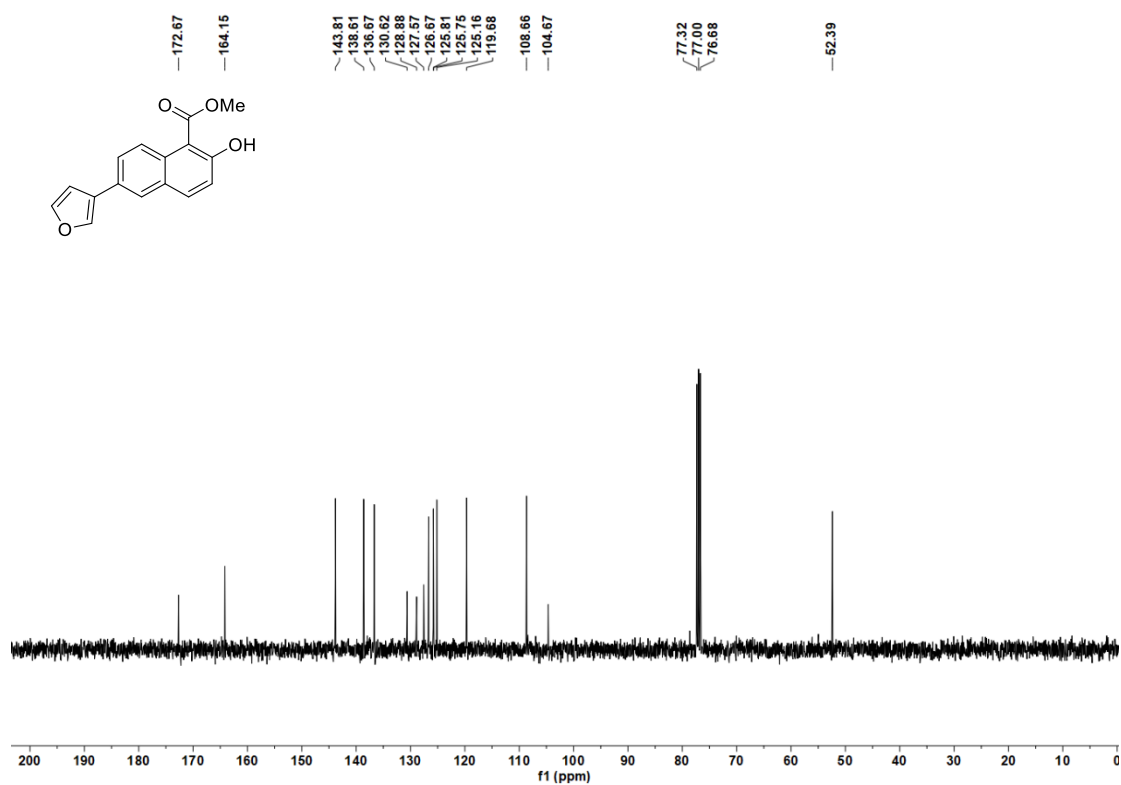

<sup>1</sup>H-NMR (400 MHz, CDCl<sub>3</sub>), <sup>13</sup>C NMR (101 MHz, CDCl<sub>3</sub>) of **7a**

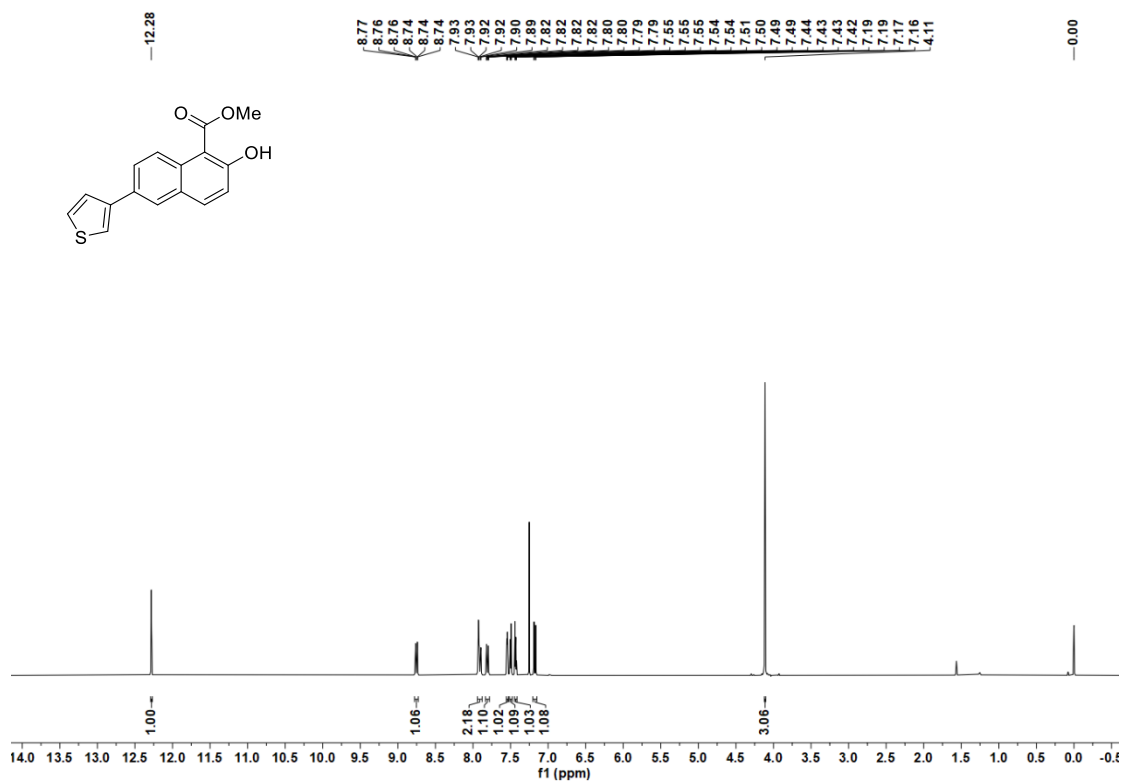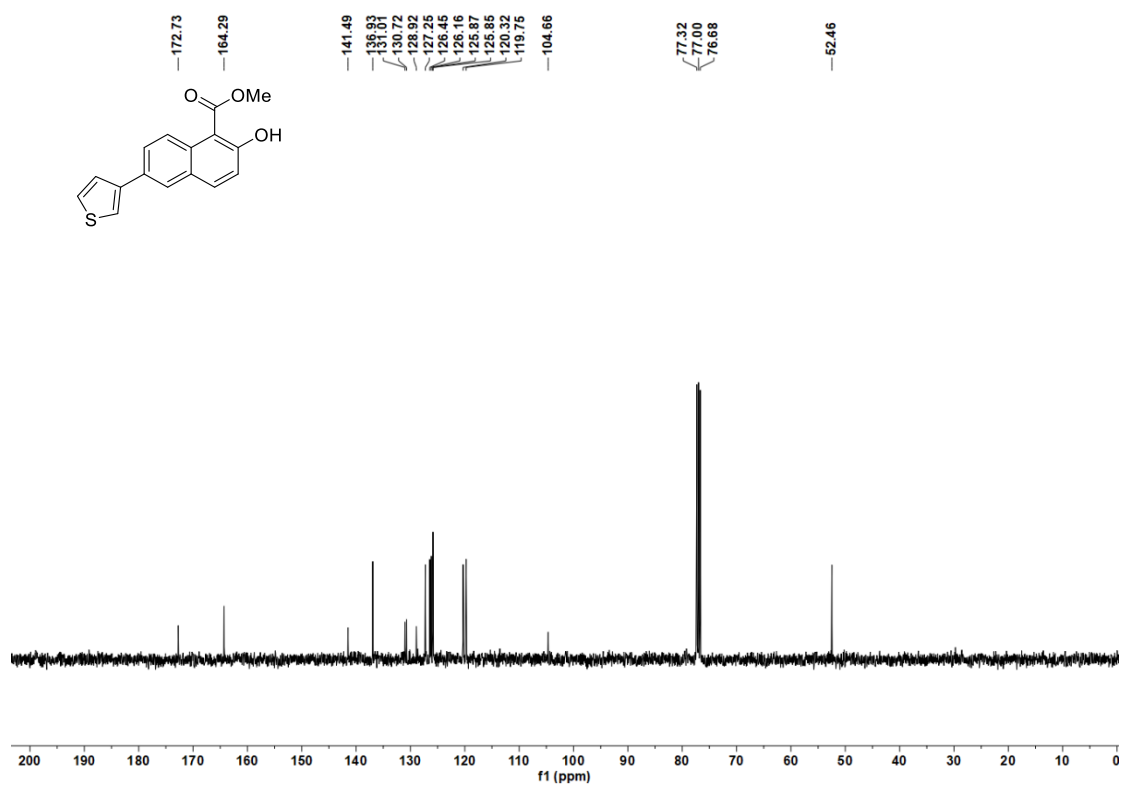

<sup>1</sup>H-NMR (400 MHz, CDCl<sub>3</sub>), <sup>13</sup>C NMR (101 MHz, CDCl<sub>3</sub>) of **8a**

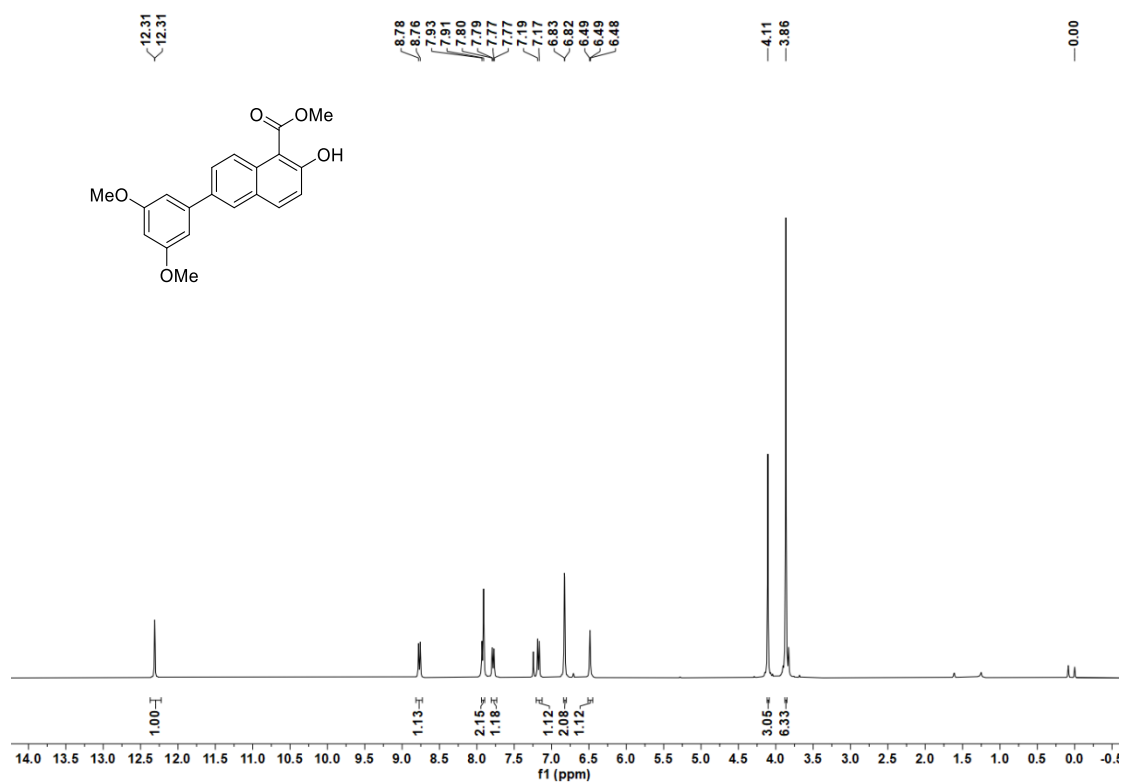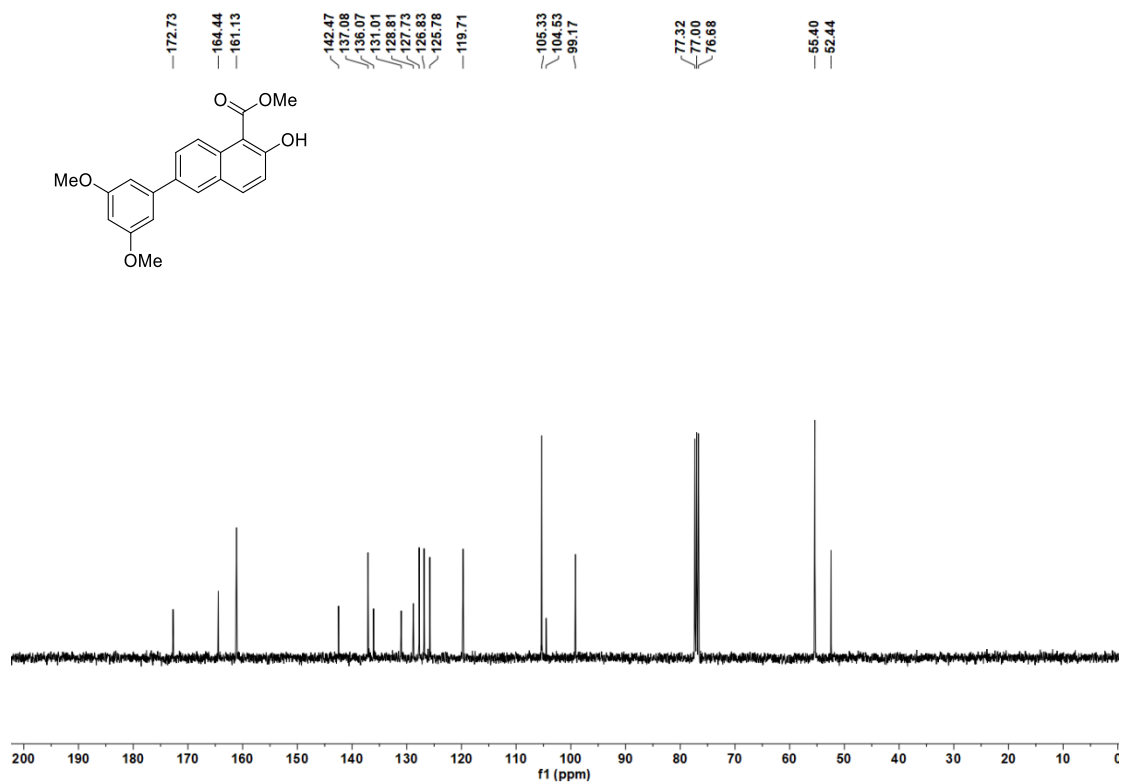

$^1\text{H-NMR}$  (400 MHz,  $\text{CDCl}_3$ ),  $^{13}\text{C-NMR}$  (101 MHz,  $\text{CDCl}_3$ ) of **9a**



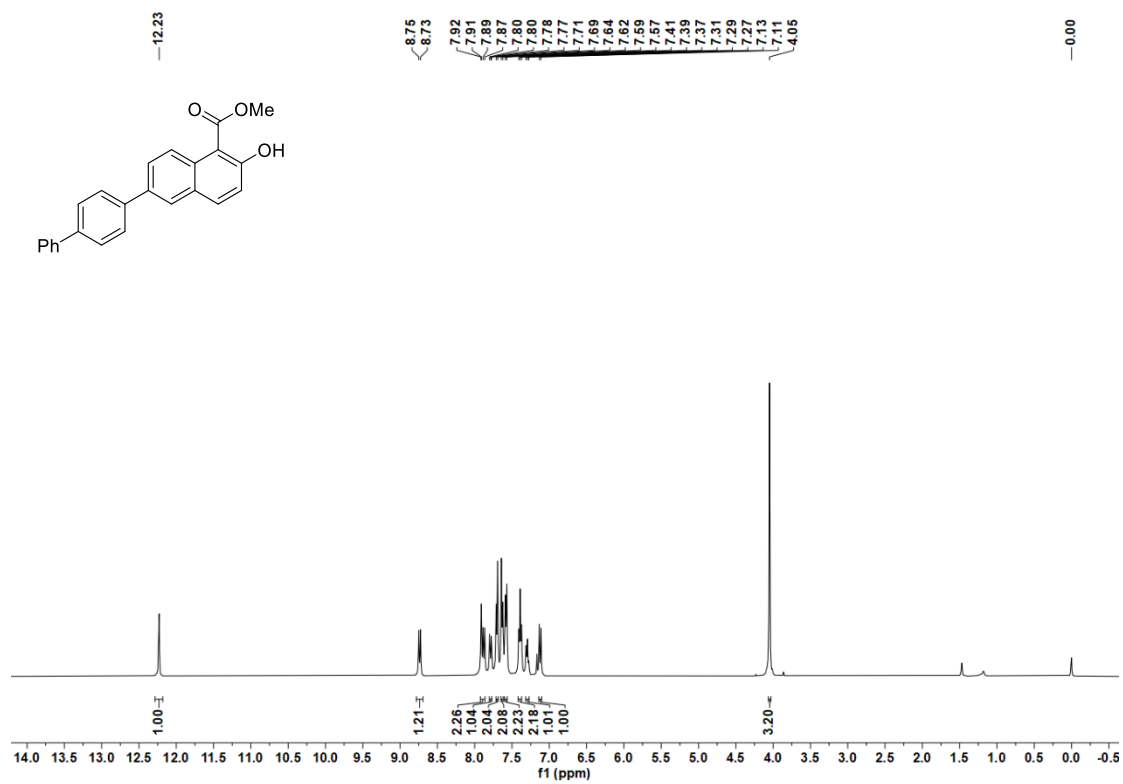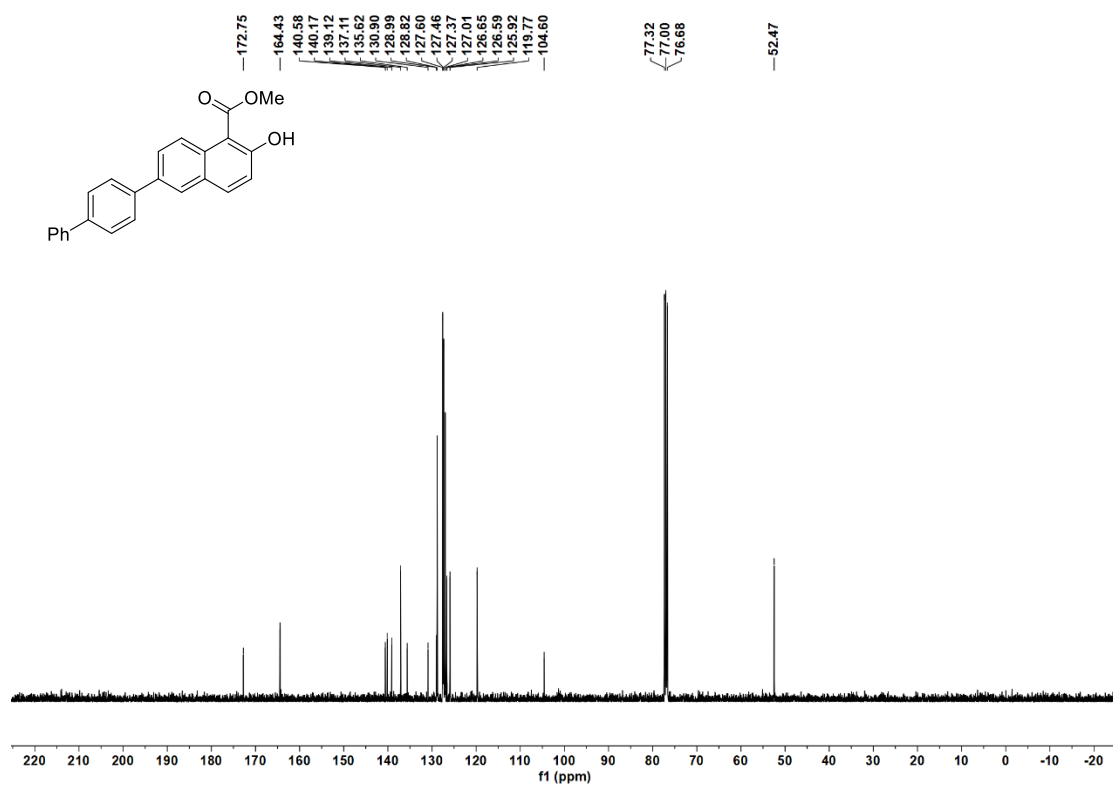

<sup>1</sup>H-NMR (400 MHz, CDCl<sub>3</sub>), <sup>13</sup>C NMR (101 MHz, CDCl<sub>3</sub>) of **10a**

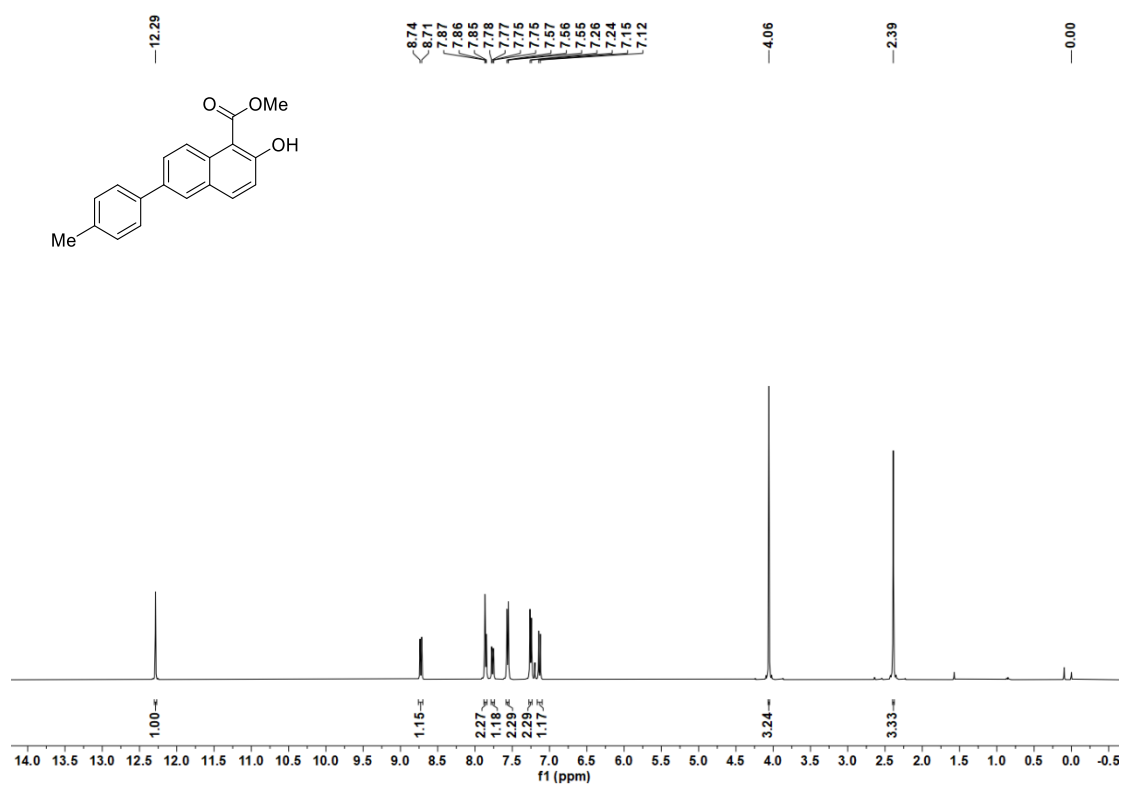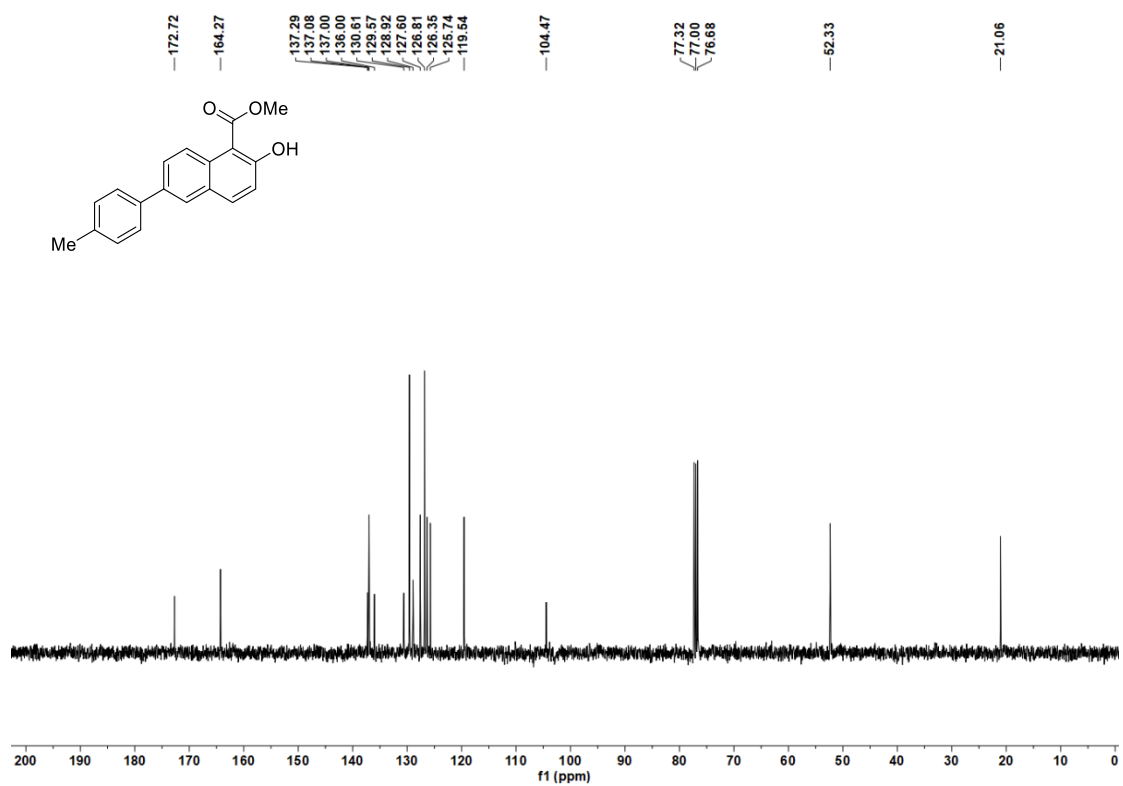

$^1\text{H-NMR}$  (400 MHz,  $\text{CDCl}_3$ ),  $^{13}\text{C-NMR}$  (101 MHz,  $\text{CDCl}_3$ ) of **11a**

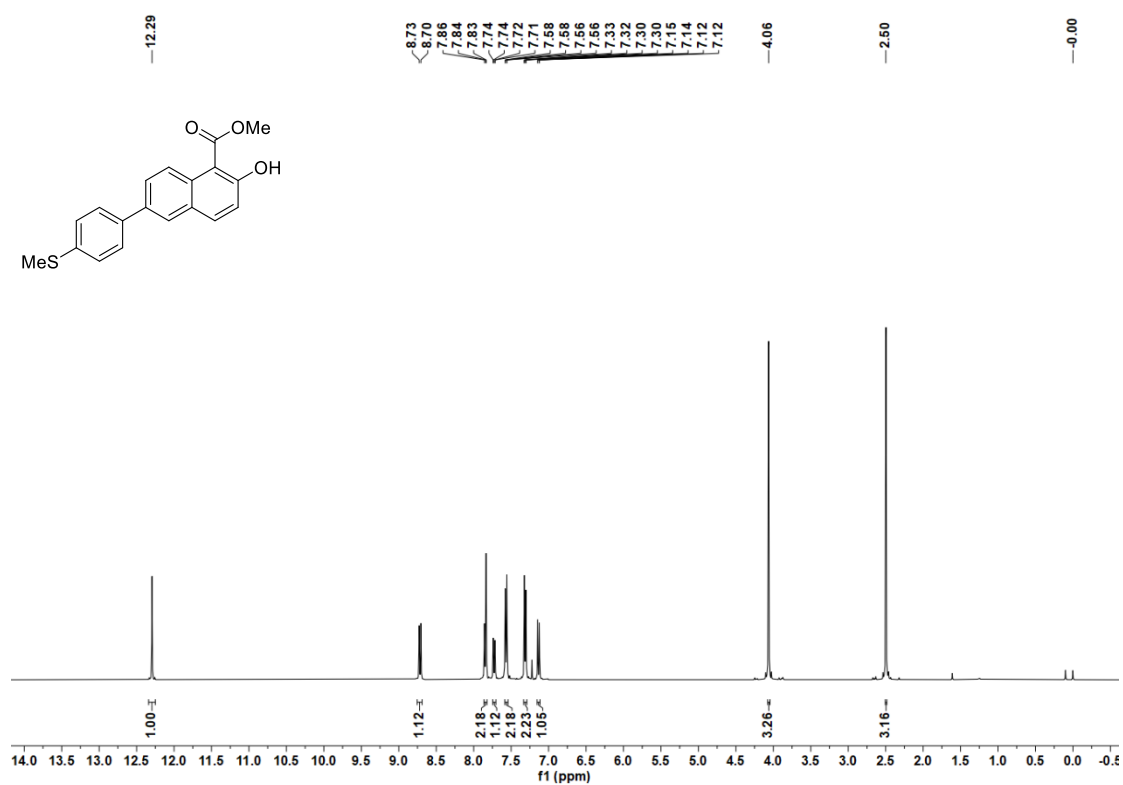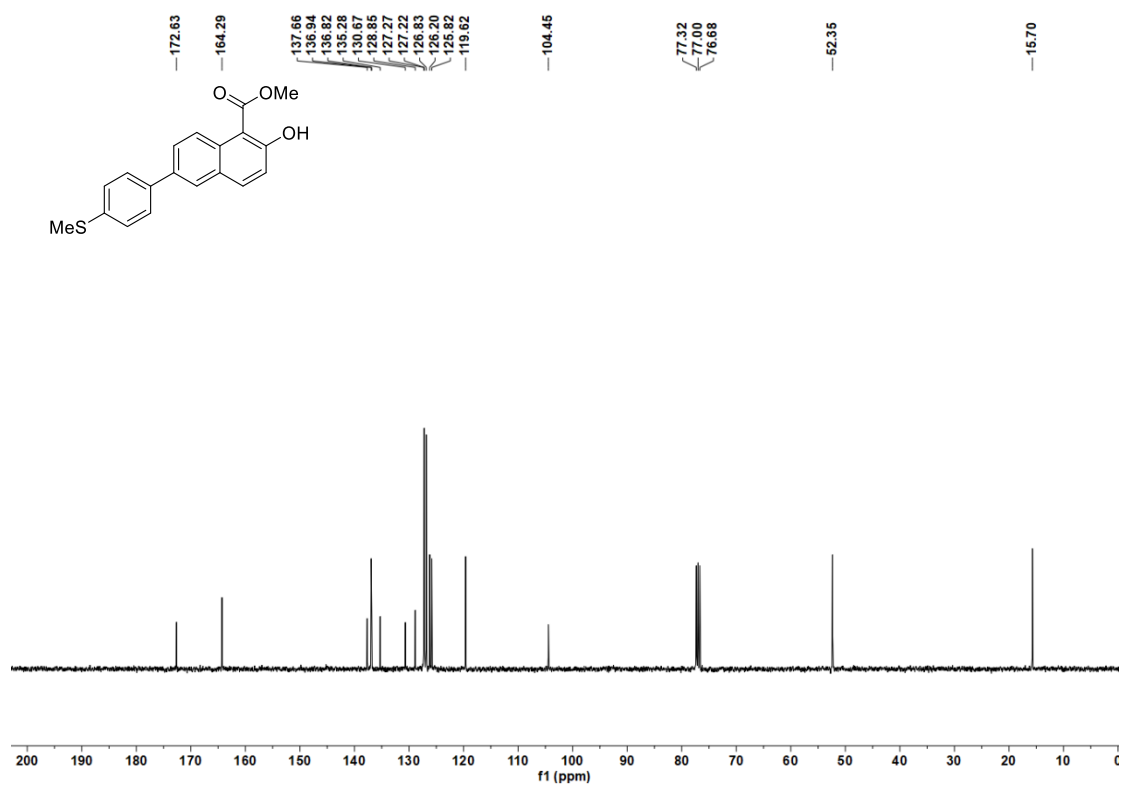

$^1\text{H-NMR}$  (400 MHz,  $\text{CDCl}_3$ ),  $^{13}\text{C-NMR}$  (101 MHz,  $\text{CDCl}_3$ ) of **12a**

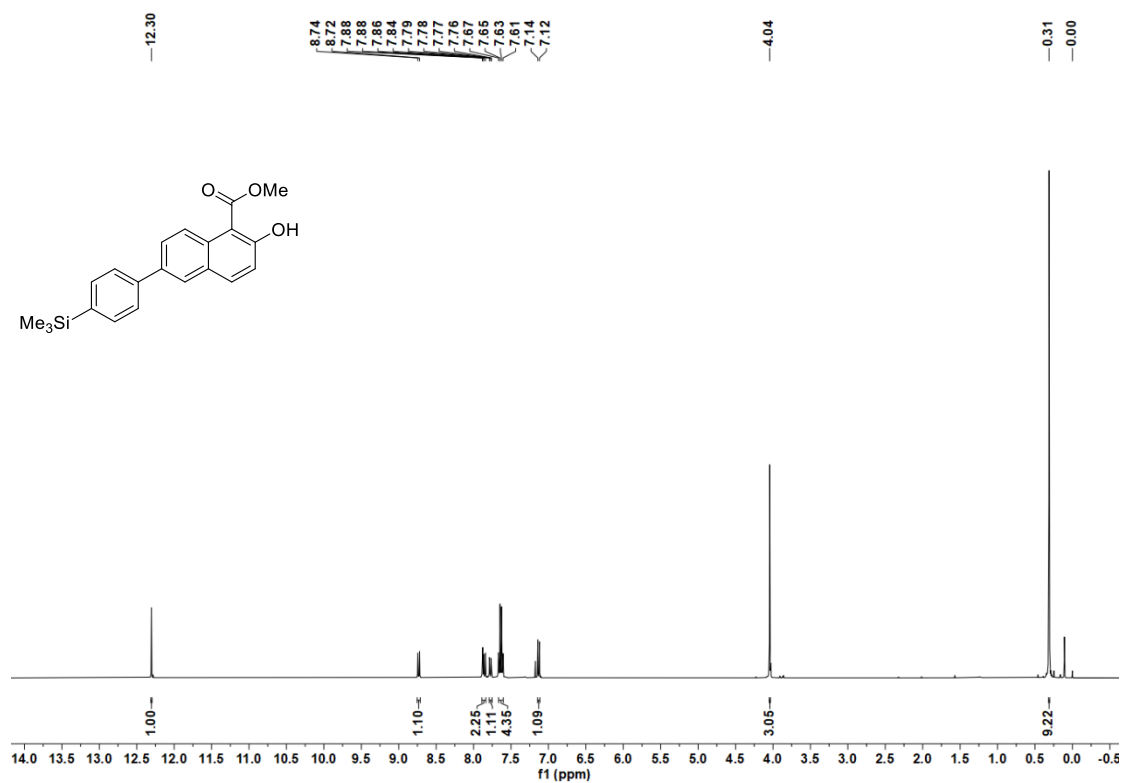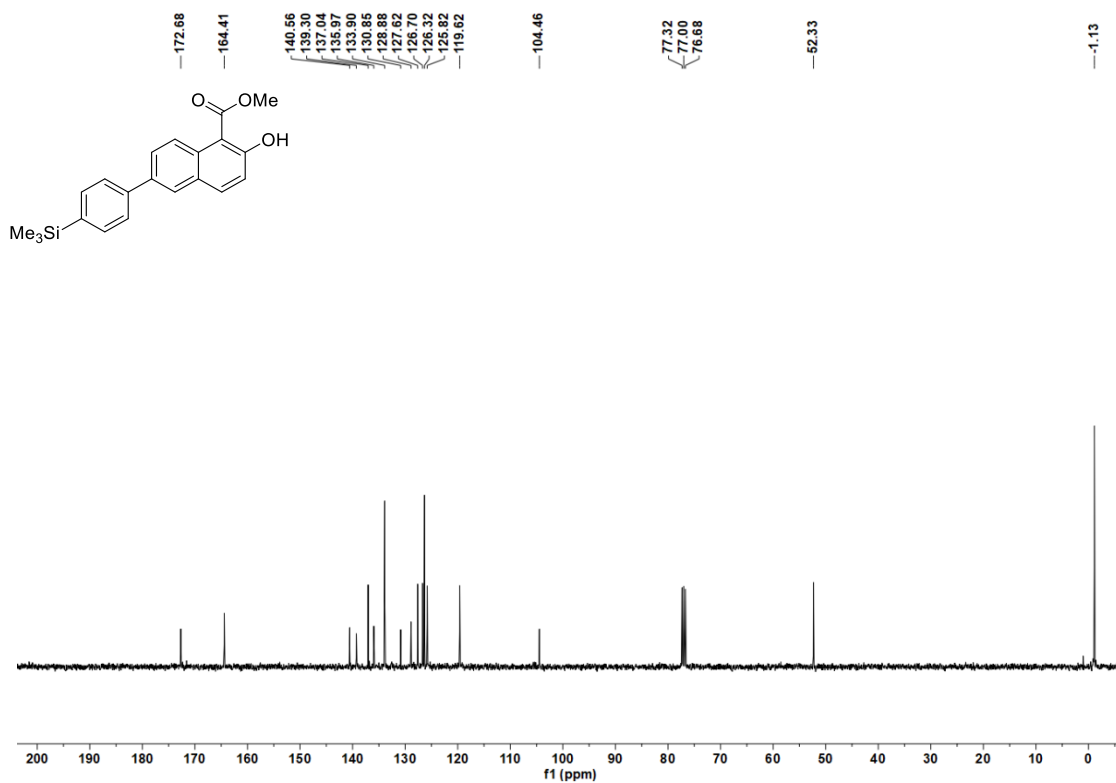

<sup>1</sup>H-NMR (400 MHz, CDCl<sub>3</sub>), <sup>13</sup>C NMR (101 MHz, CDCl<sub>3</sub>) of **13a**

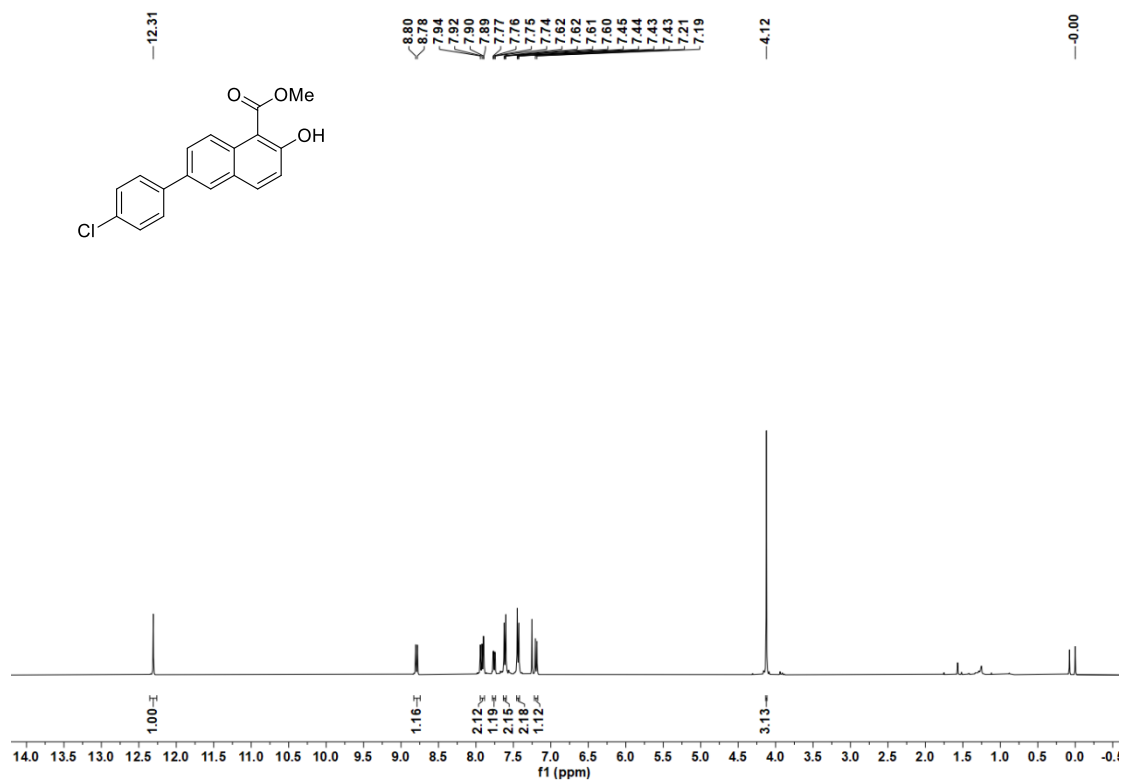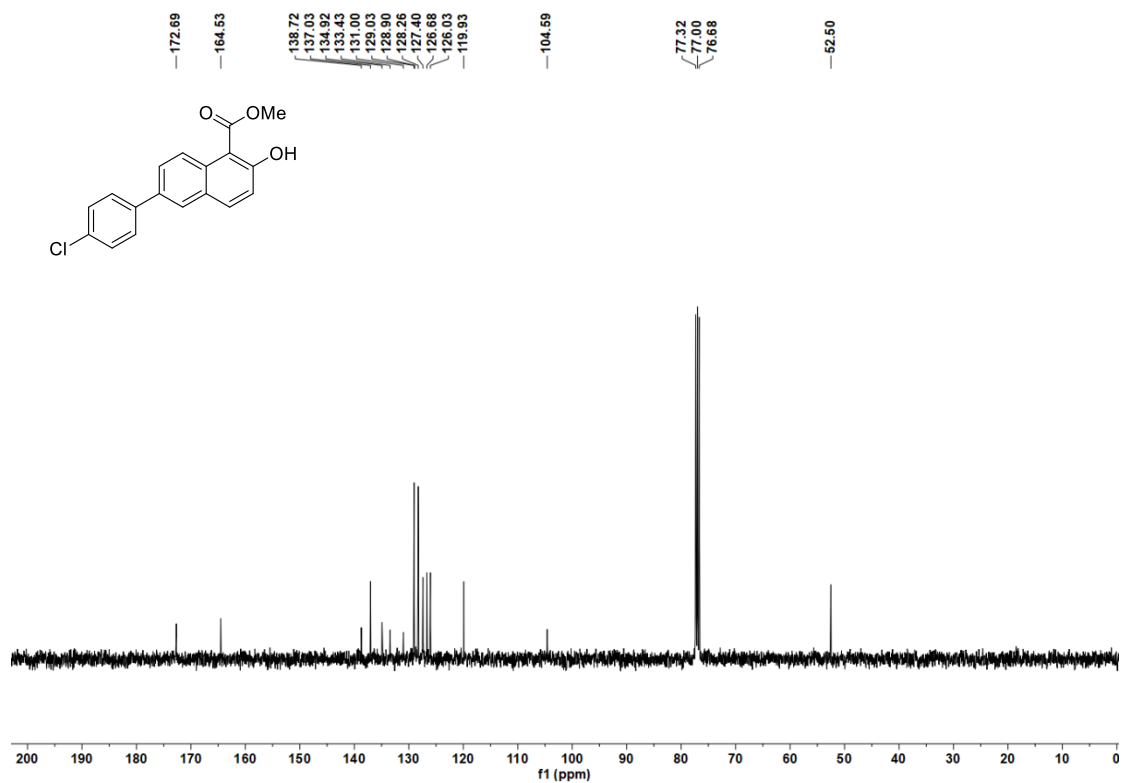

$^1\text{H-NMR}$  (400 MHz,  $\text{CDCl}_3$ ),  $^{13}\text{C-NMR}$  (101 MHz,  $\text{CDCl}_3$ ) of **14a**

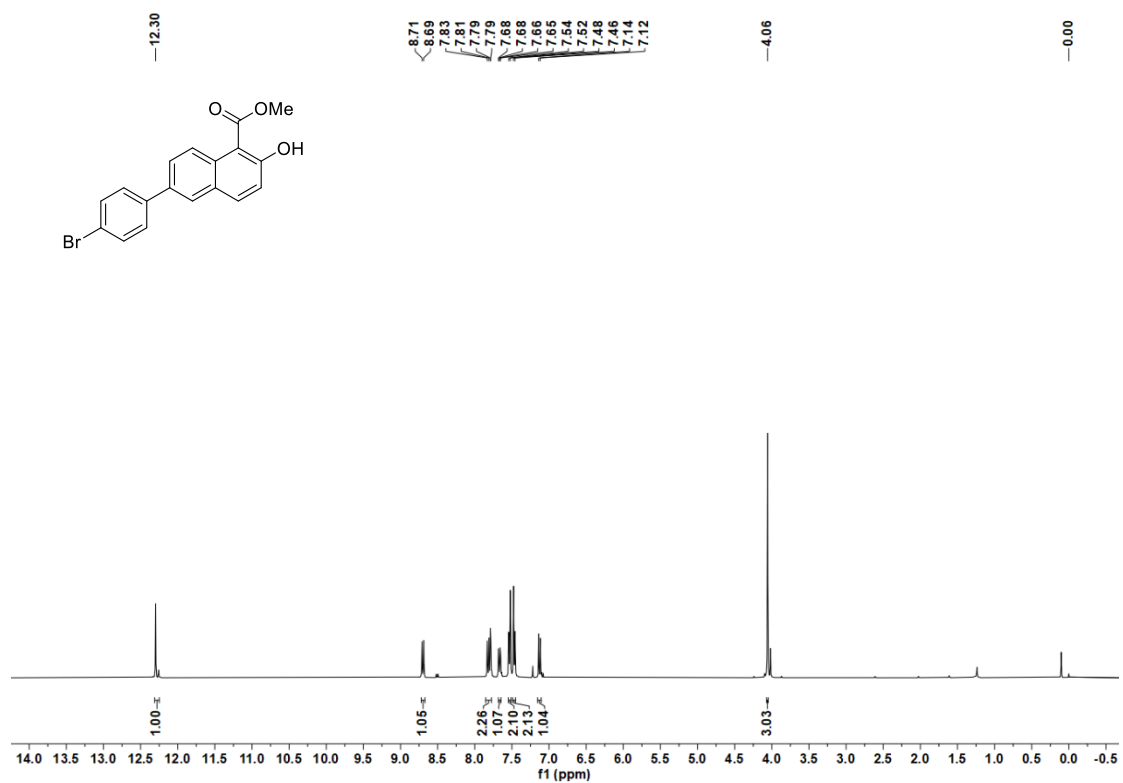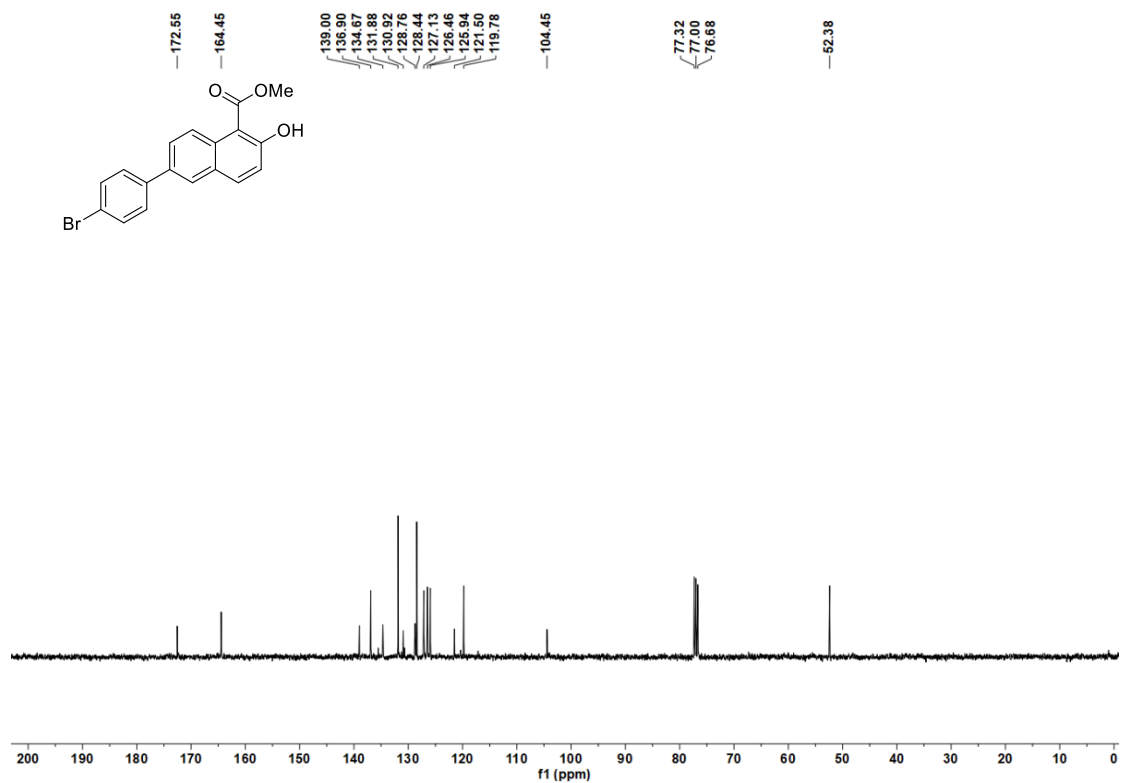

<sup>1</sup>H-NMR (400 MHz, CDCl<sub>3</sub>), <sup>13</sup>C NMR (101 MHz, CDCl<sub>3</sub>) of **15a**

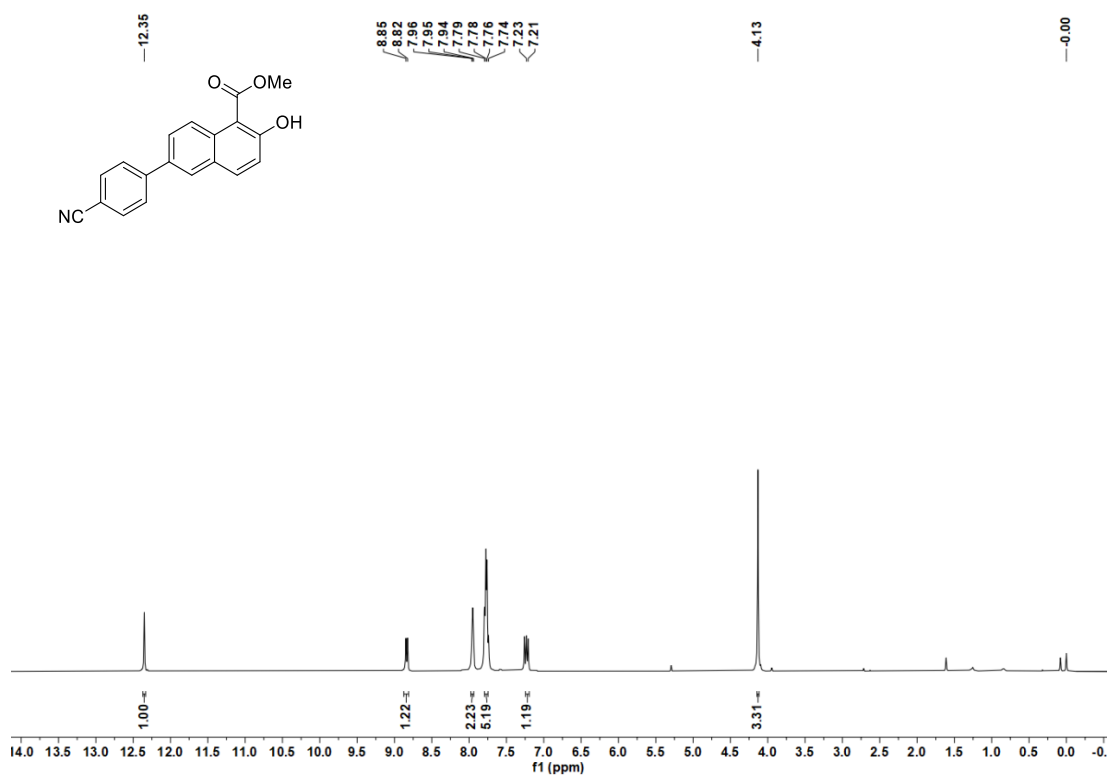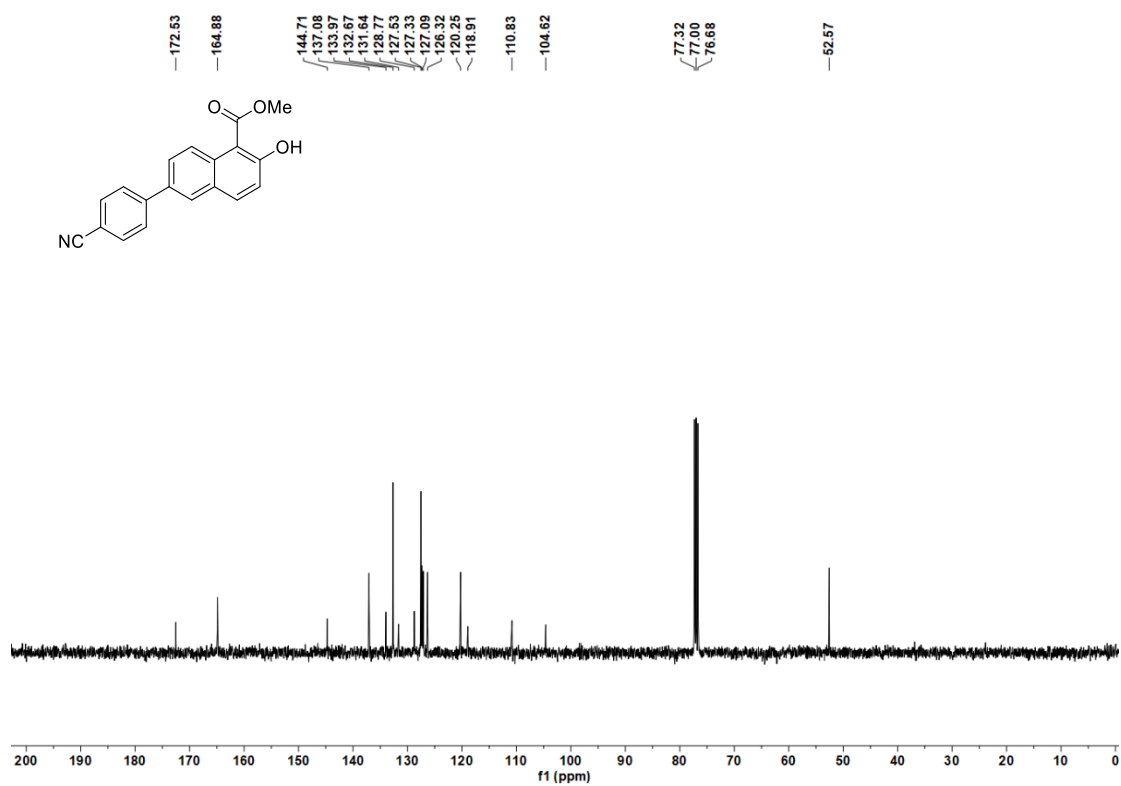

$^1\text{H-NMR}$  (400 MHz,  $\text{CDCl}_3$ ),  $^{13}\text{C-NMR}$  (101 MHz,  $\text{CDCl}_3$ ) of **16a**

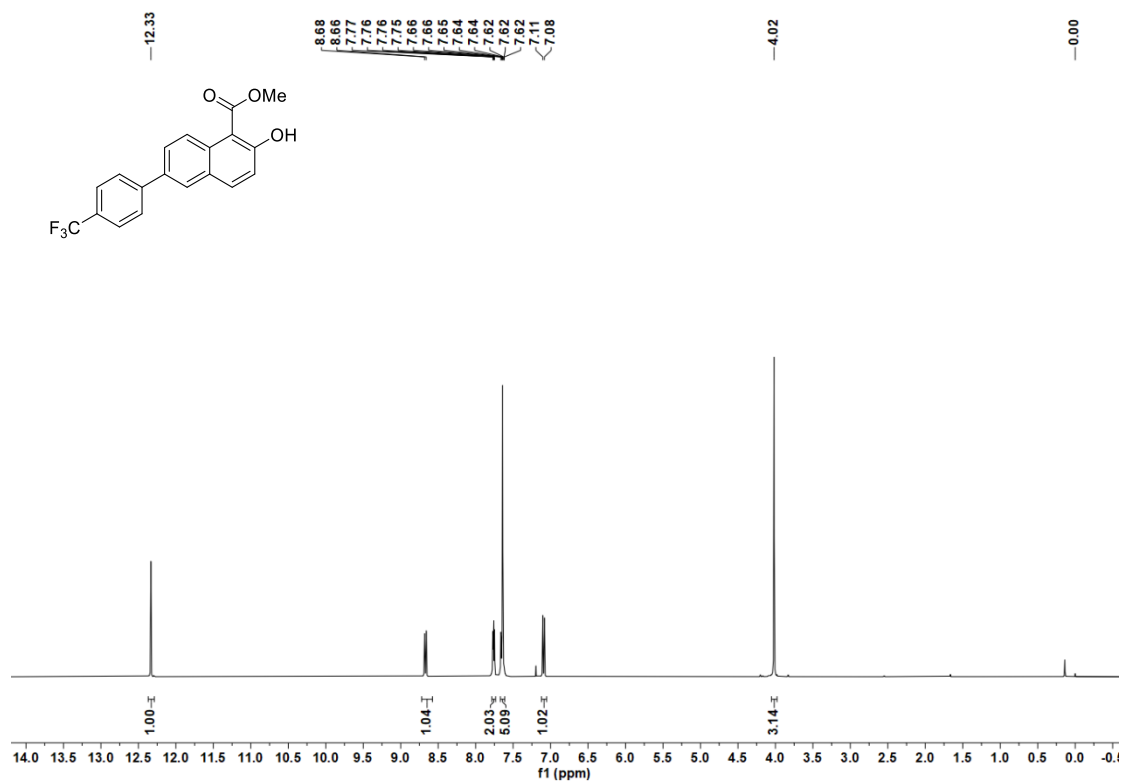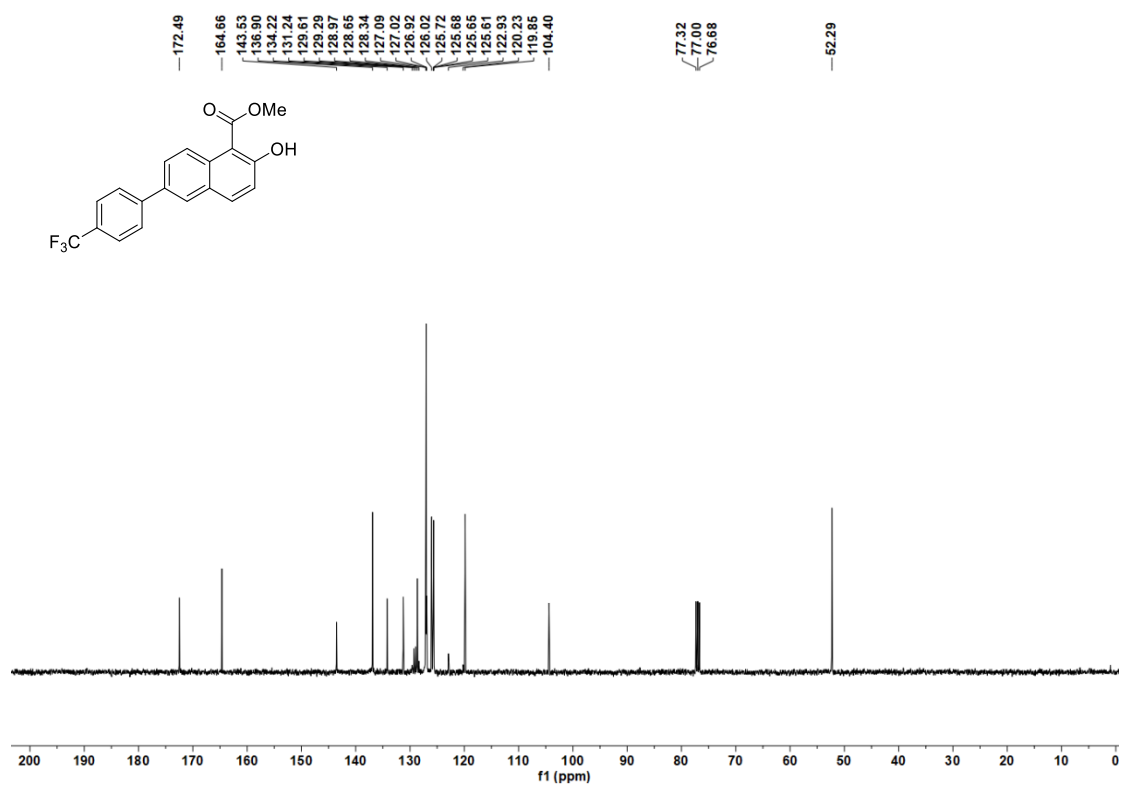



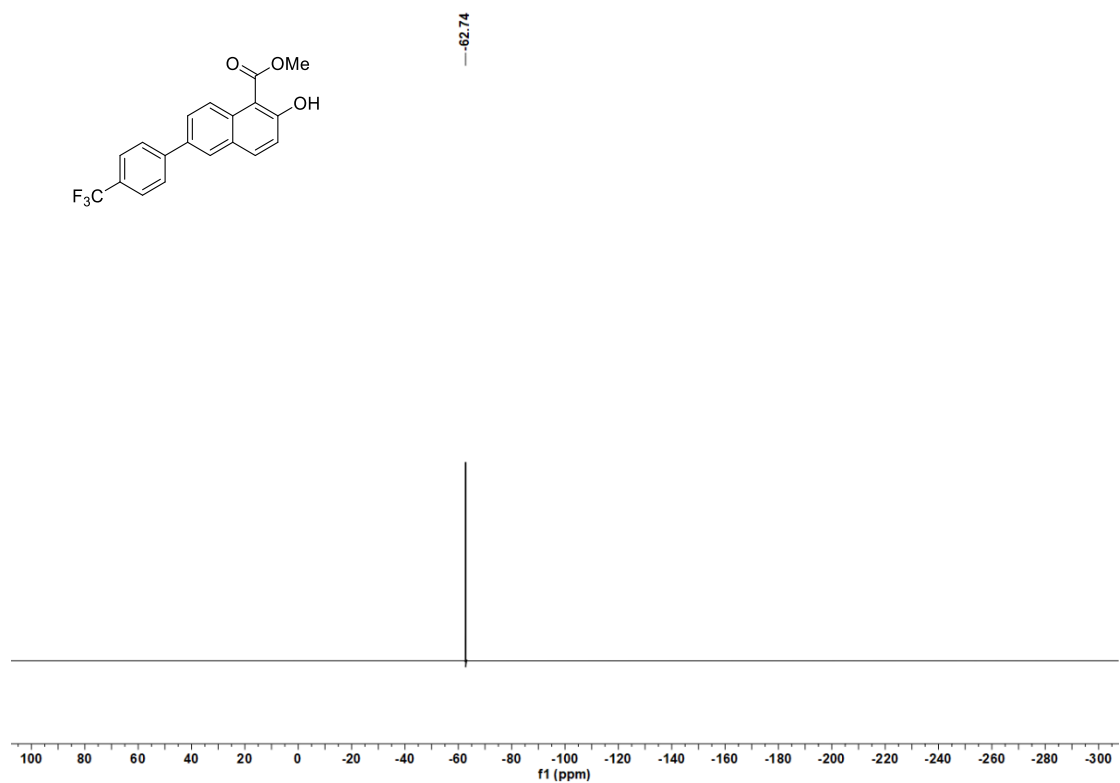

$^1\text{H}$ -NMR (400 MHz,  $\text{CDCl}_3$ ),  $^{13}\text{C}$  NMR (101 MHz,  $\text{CDCl}_3$ ),  $^{19}\text{F}$ -NMR (376 MHz,  $\text{CDCl}_3$ ), of 17a

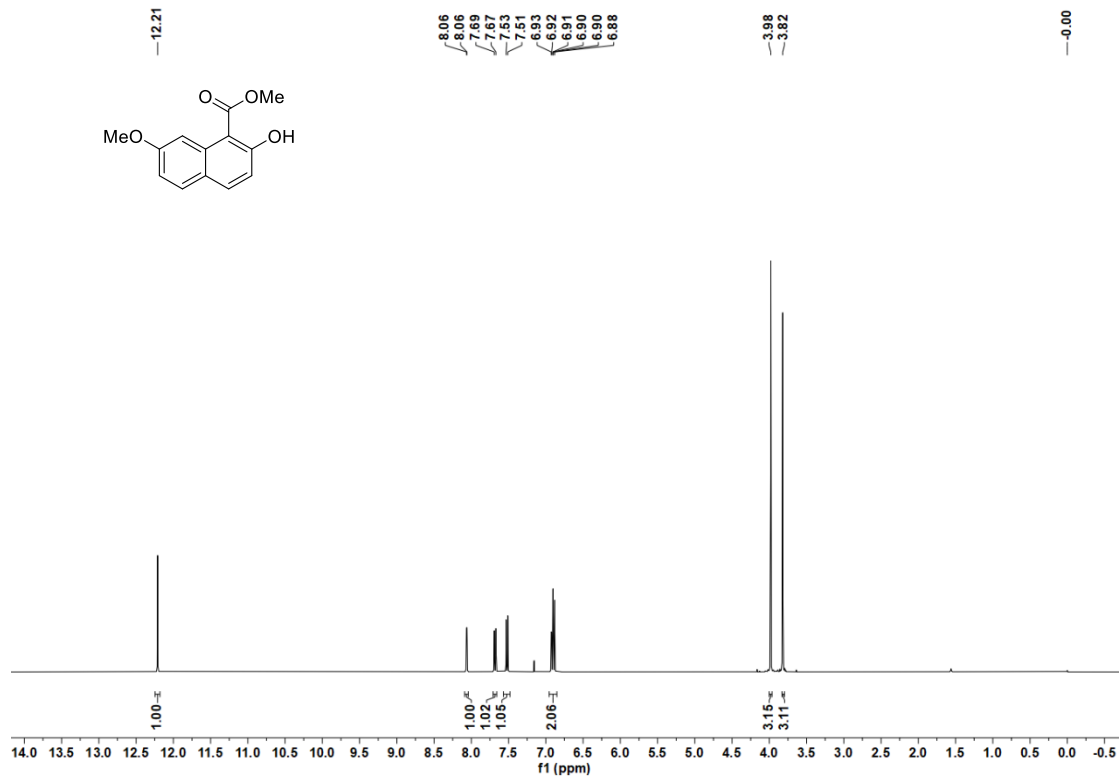

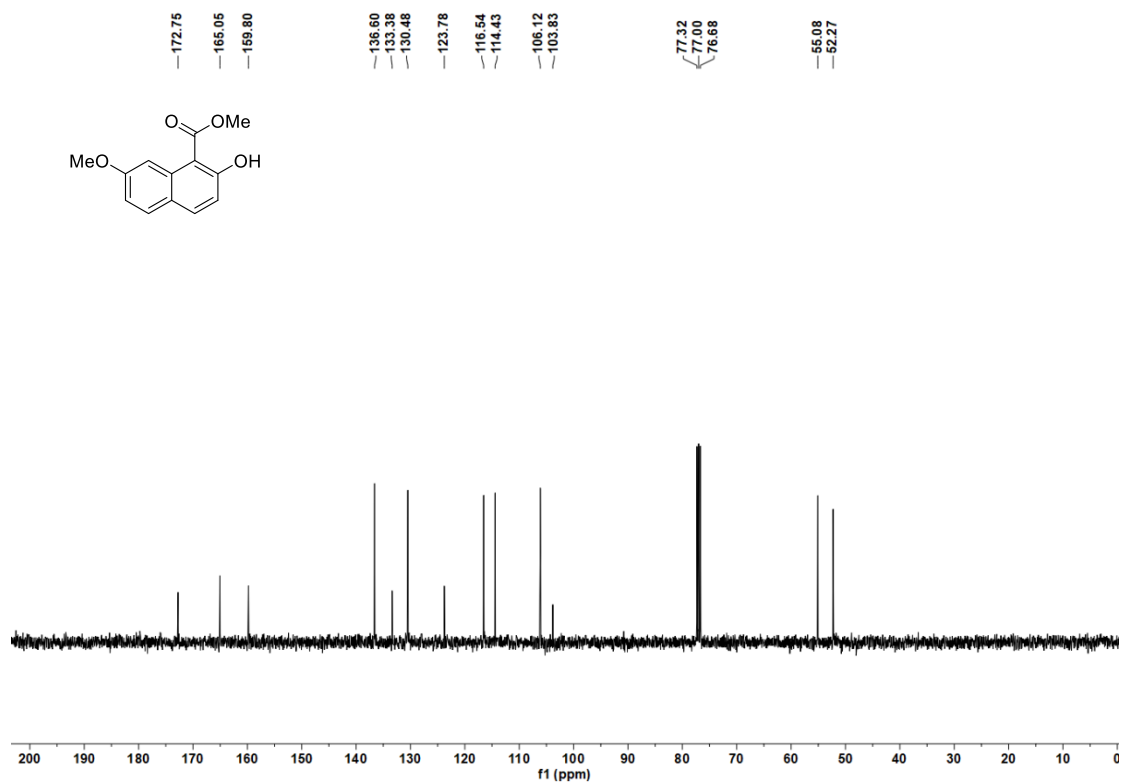

<sup>1</sup>H-NMR (400 MHz, CDCl<sub>3</sub>), <sup>13</sup>C NMR (101 MHz, CDCl<sub>3</sub>) of **18a**

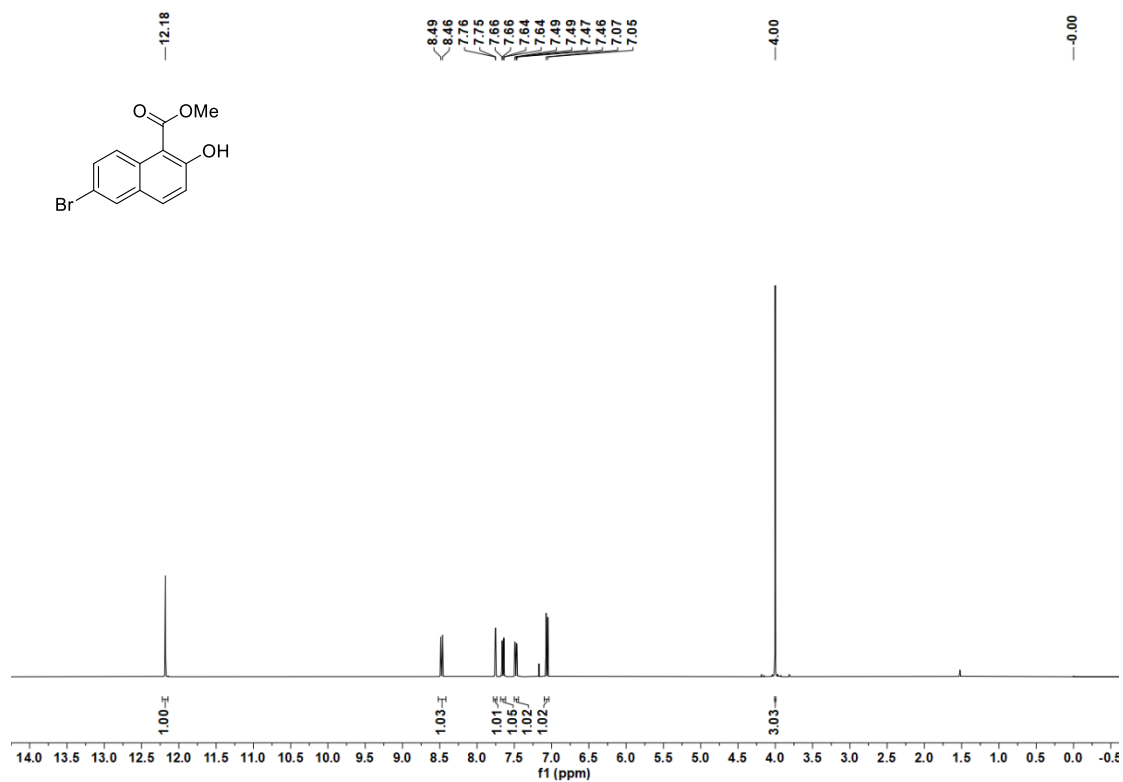

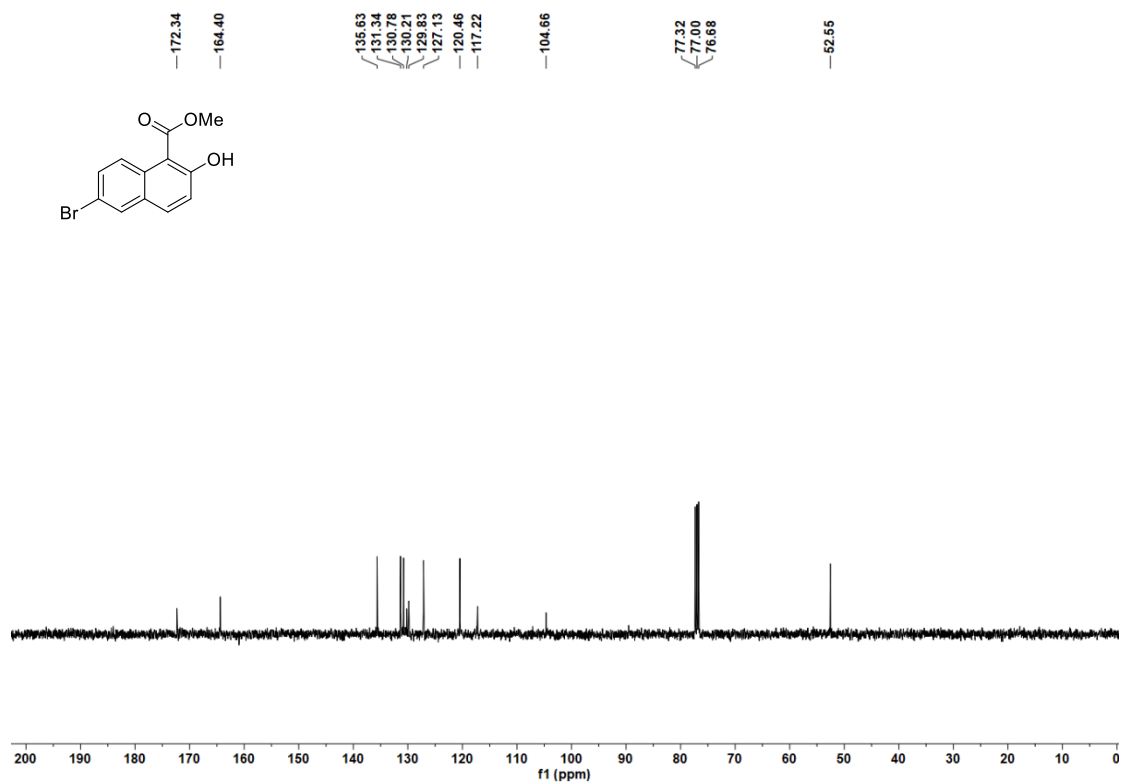

$^1\text{H-NMR}$  (400 MHz,  $\text{CDCl}_3$ ),  $^{13}\text{C NMR}$  (101 MHz,  $\text{CDCl}_3$ ) of **19a**

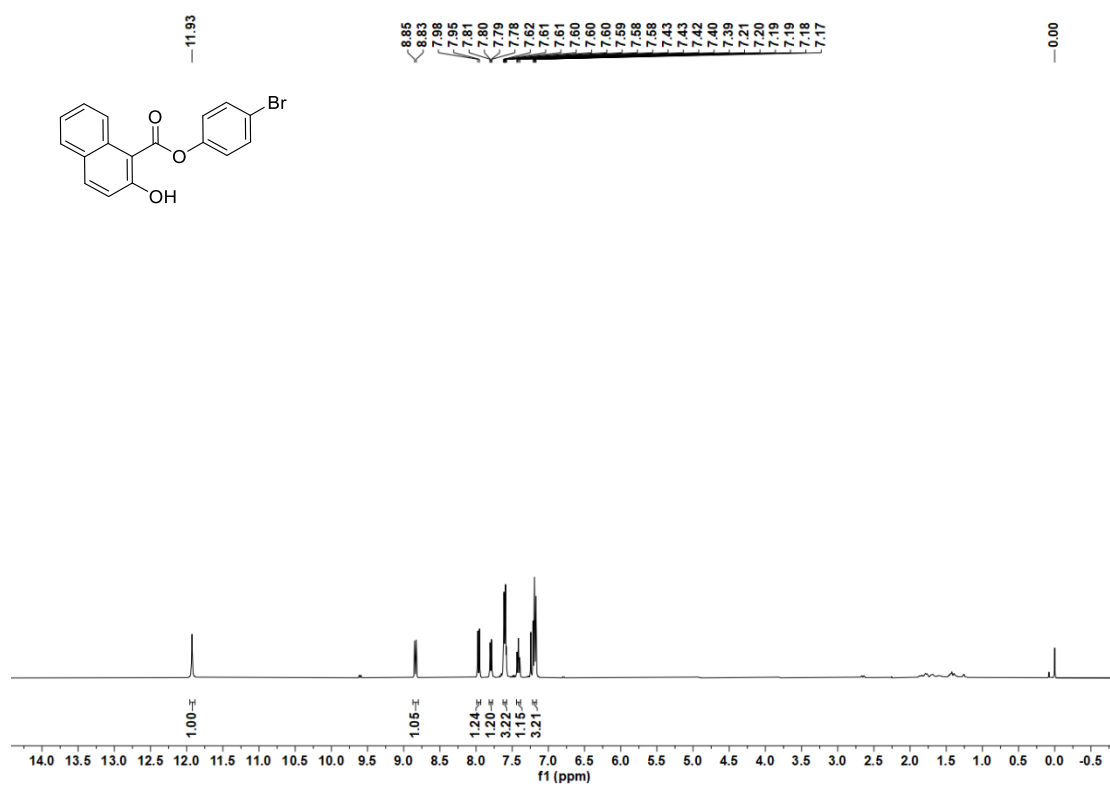

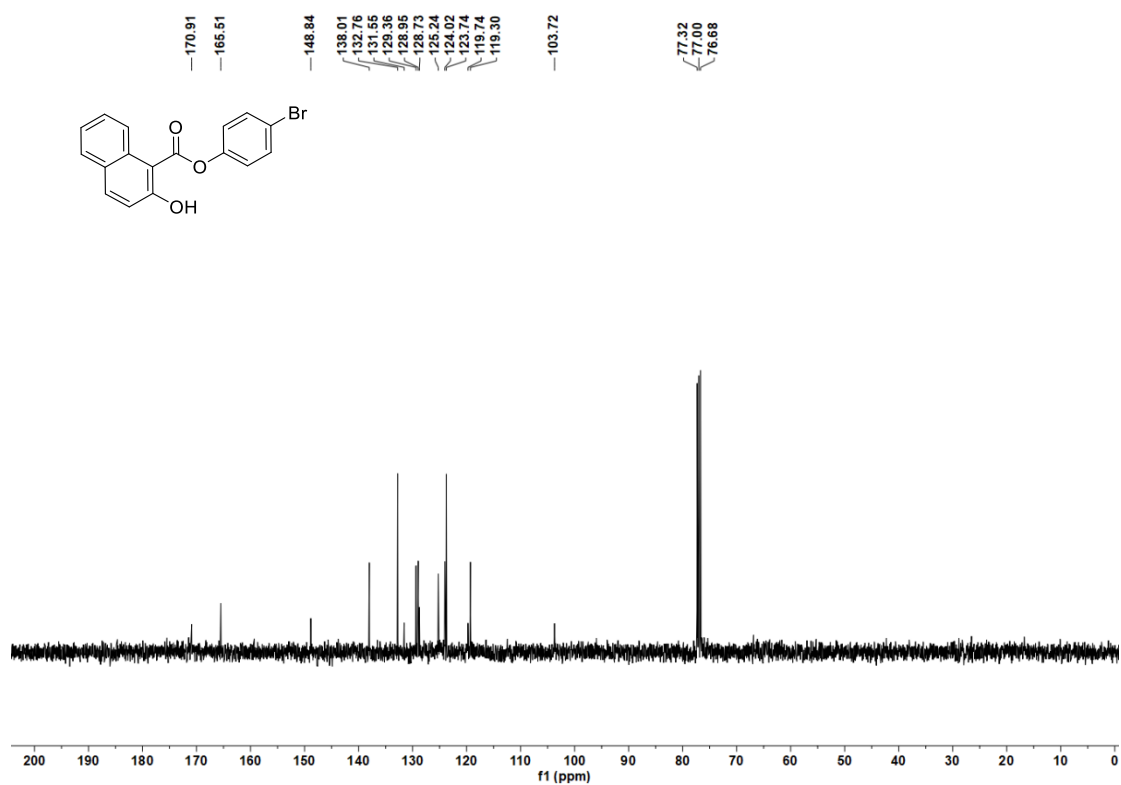

$^1\text{H}$ -NMR (400 MHz,  $\text{CDCl}_3$ ),  $^{13}\text{C}$  NMR (101 MHz,  $\text{CDCl}_3$ ) of **20a**

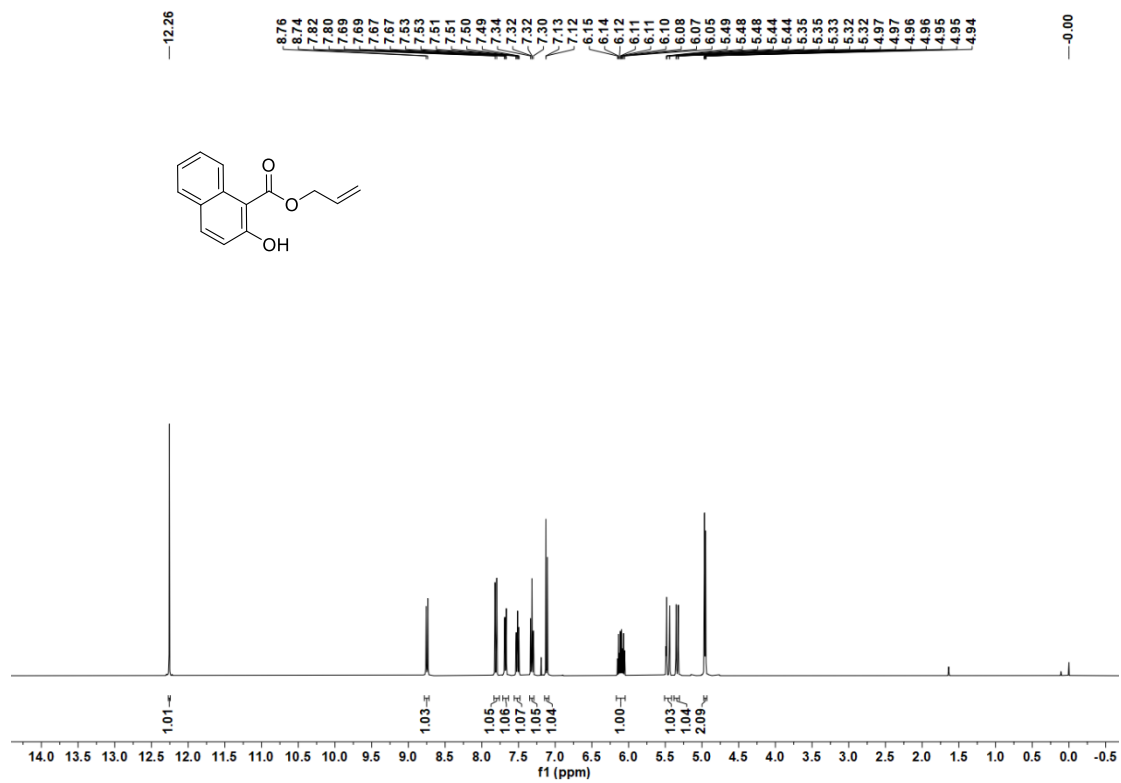

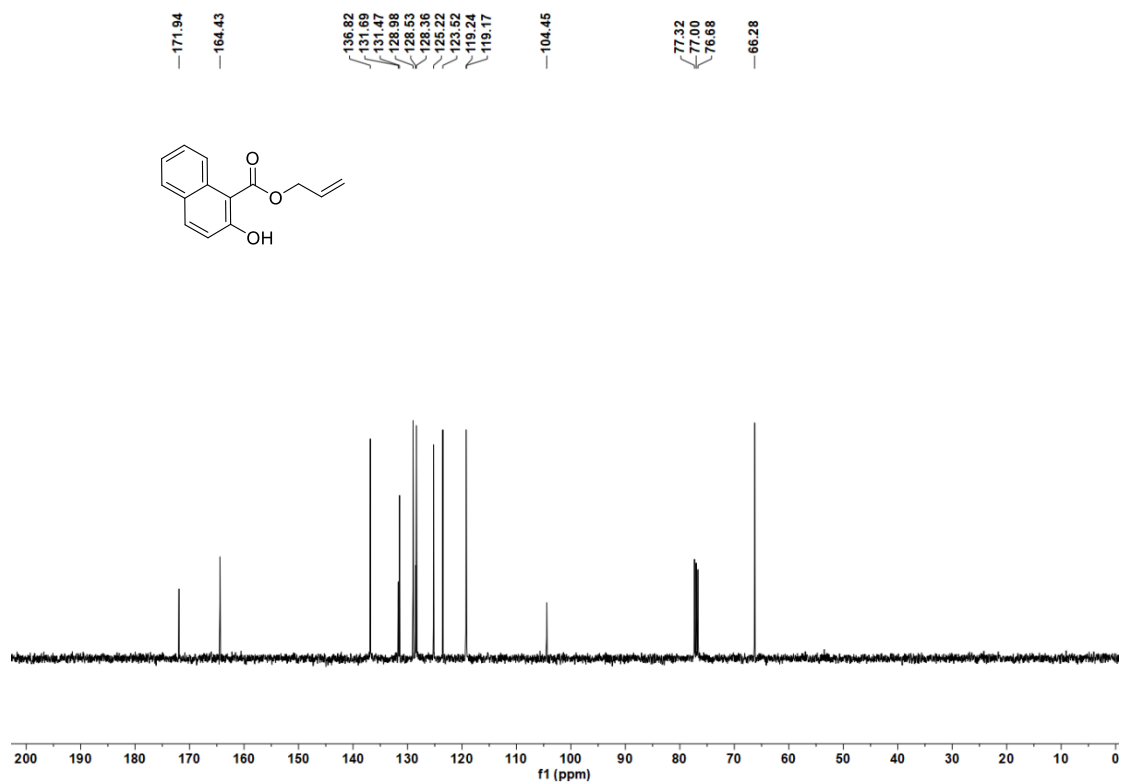

$^1\text{H}$ -NMR (400 MHz,  $\text{CDCl}_3$ ),  $^{13}\text{C}$  NMR (101 MHz,  $\text{CDCl}_3$ ) of **21a**

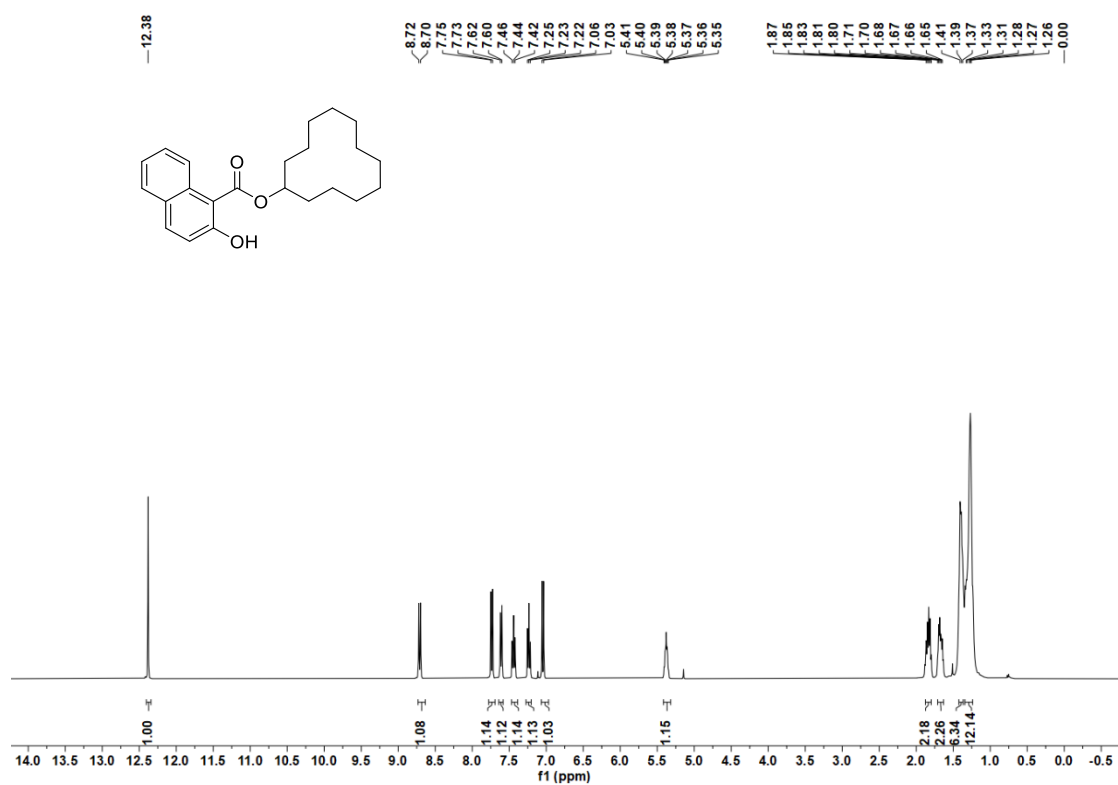

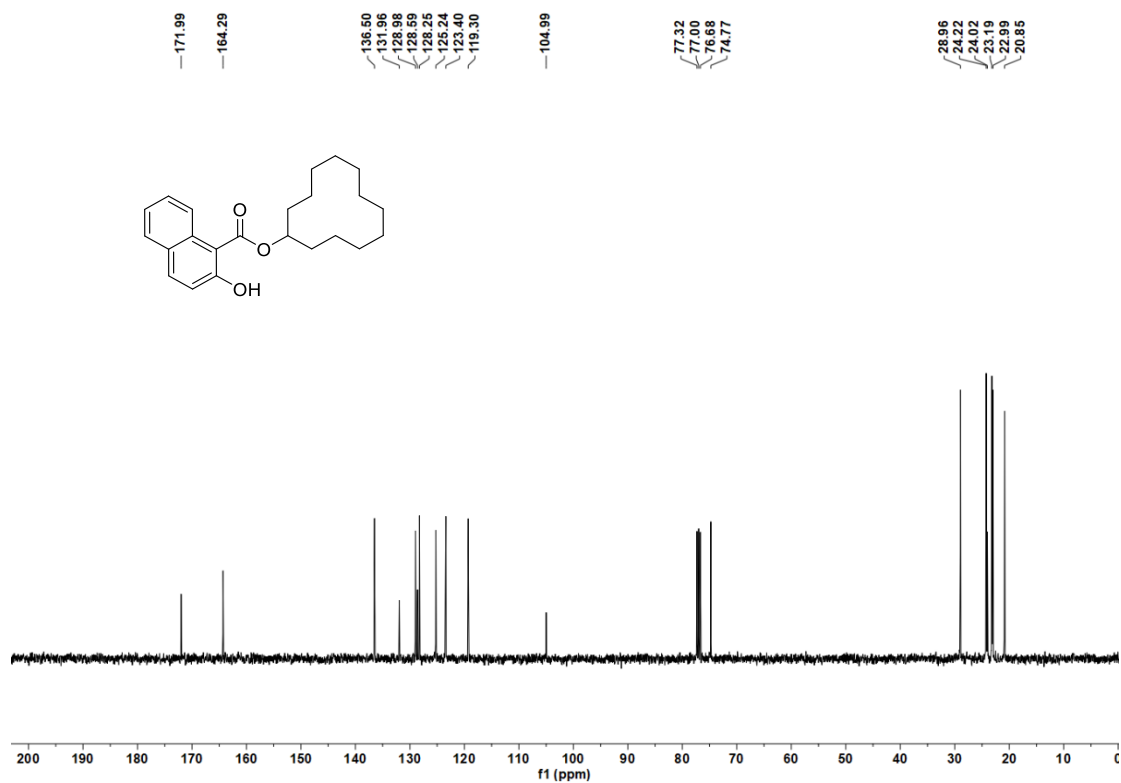

$^1\text{H-NMR}$  (400 MHz,  $\text{CDCl}_3$ ),  $^{13}\text{C}$  NMR (101 MHz,  $\text{CDCl}_3$ ) of **22a**

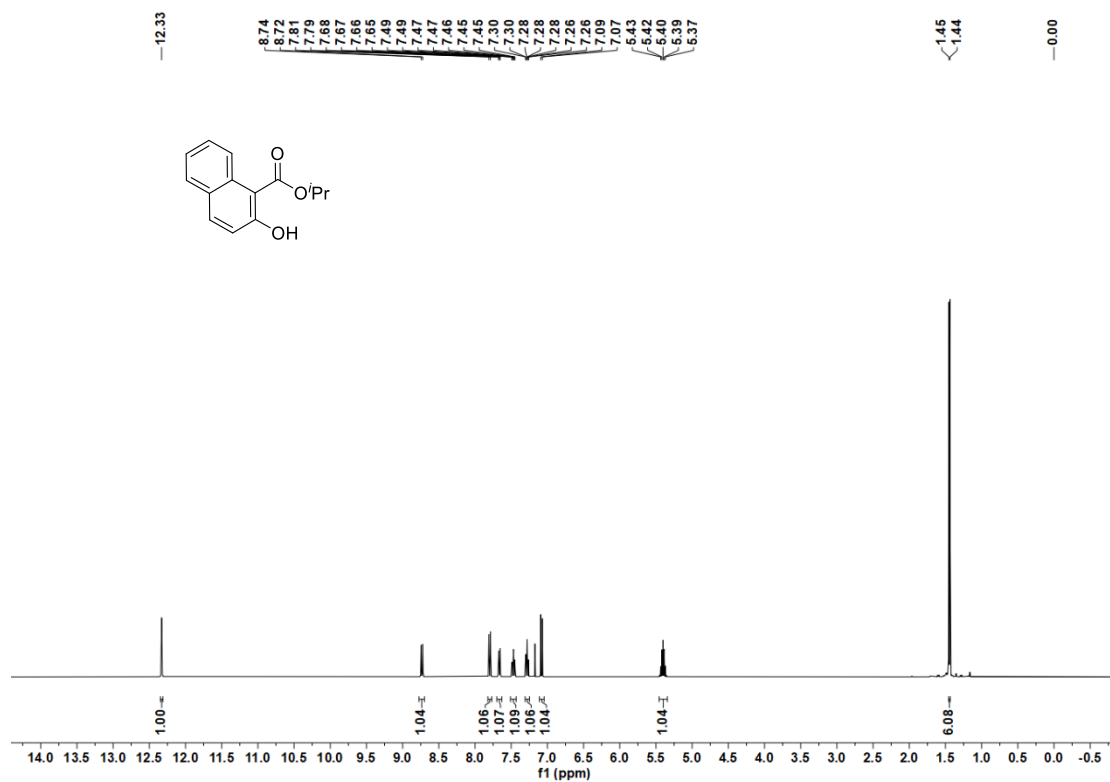



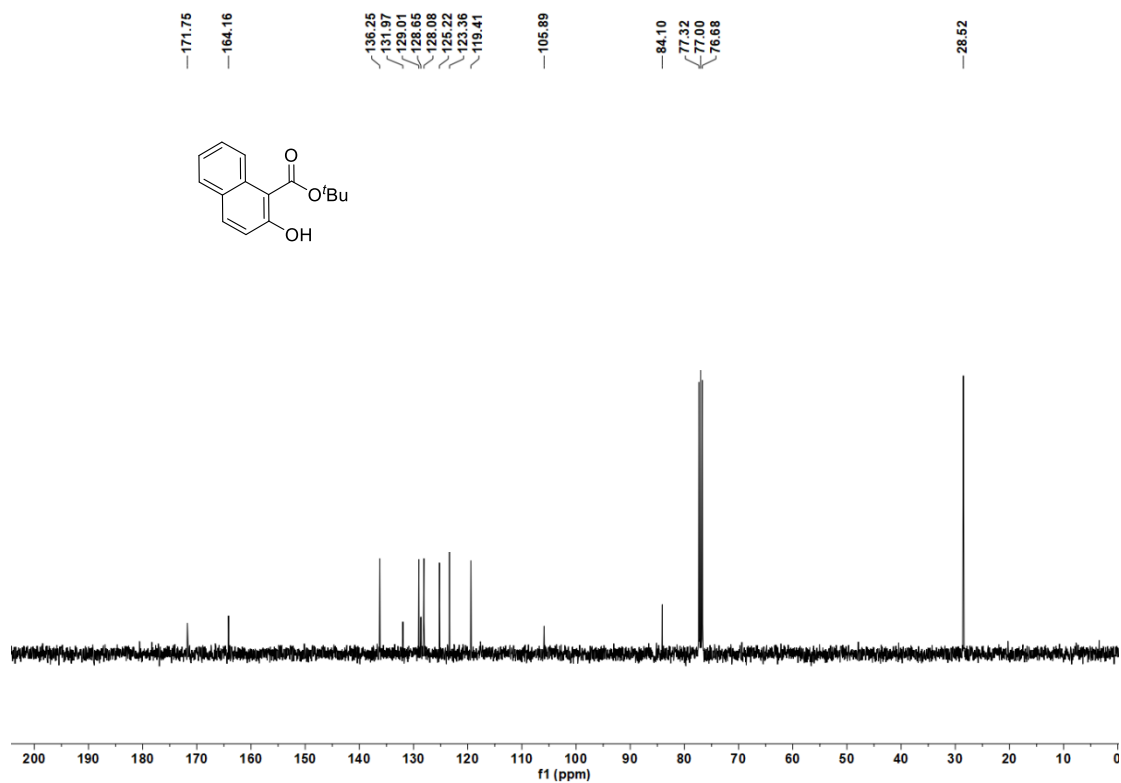

$^1\text{H}$ -NMR (400 MHz,  $\text{CDCl}_3$ ),  $^{13}\text{C}$  NMR (101 MHz,  $\text{CDCl}_3$ ) of **24a**

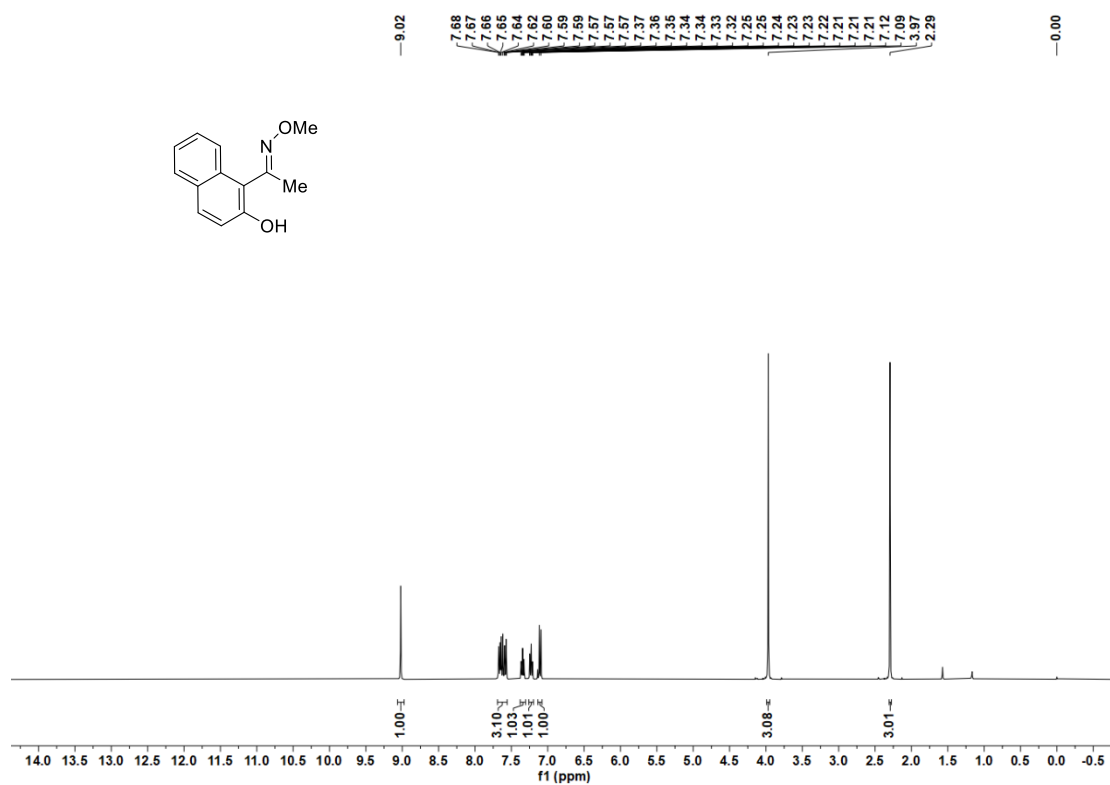



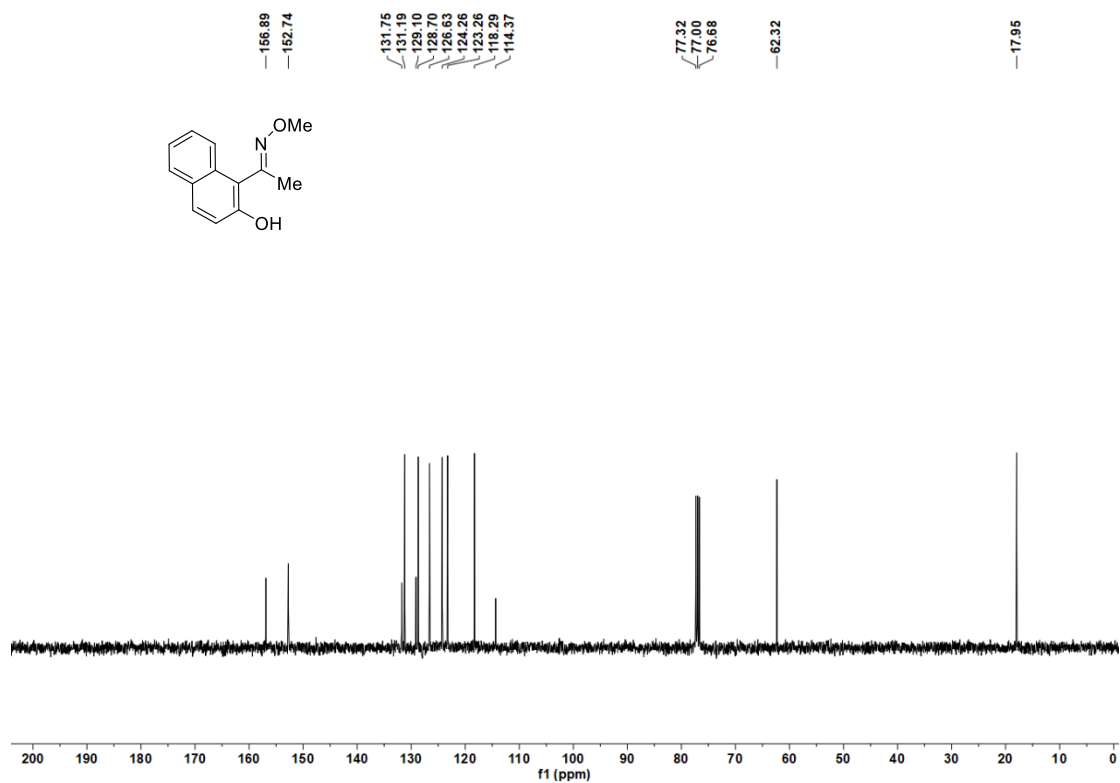

$^1\text{H-NMR}$  (400 MHz,  $\text{CDCl}_3$ ),  $^{13}\text{C}$  NMR (101 MHz,  $\text{CDCl}_3$ ) of **25a**

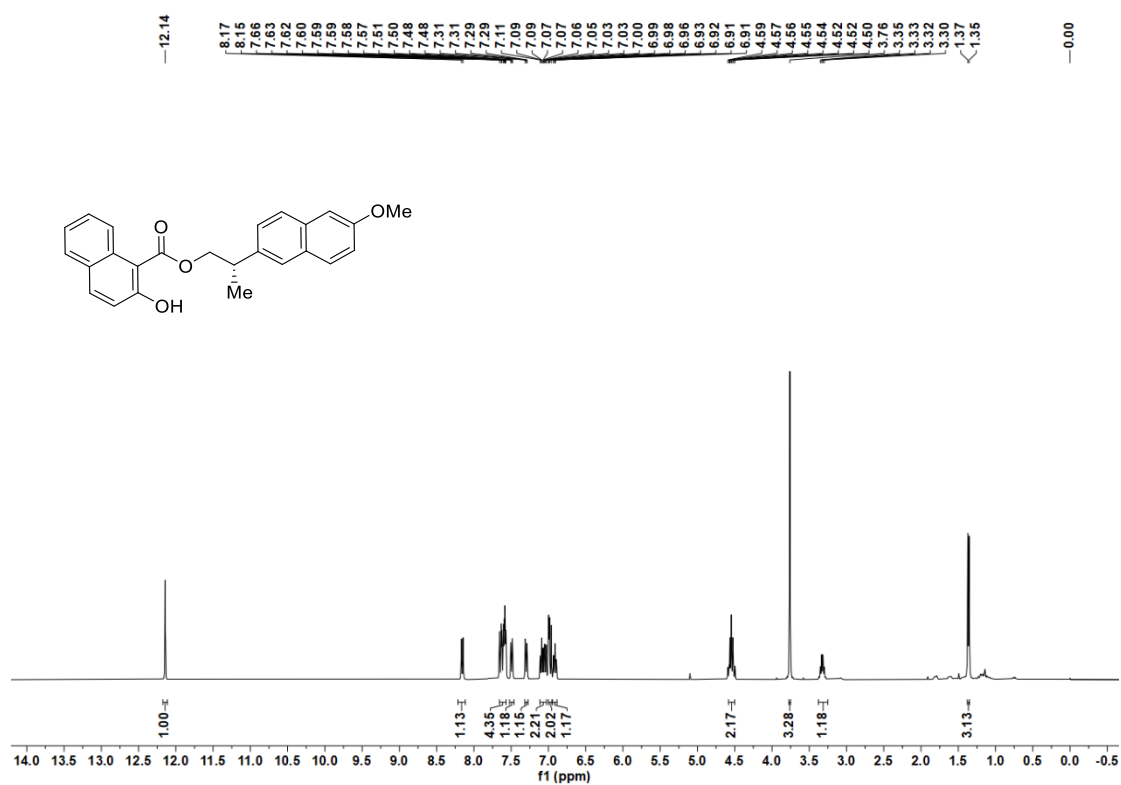

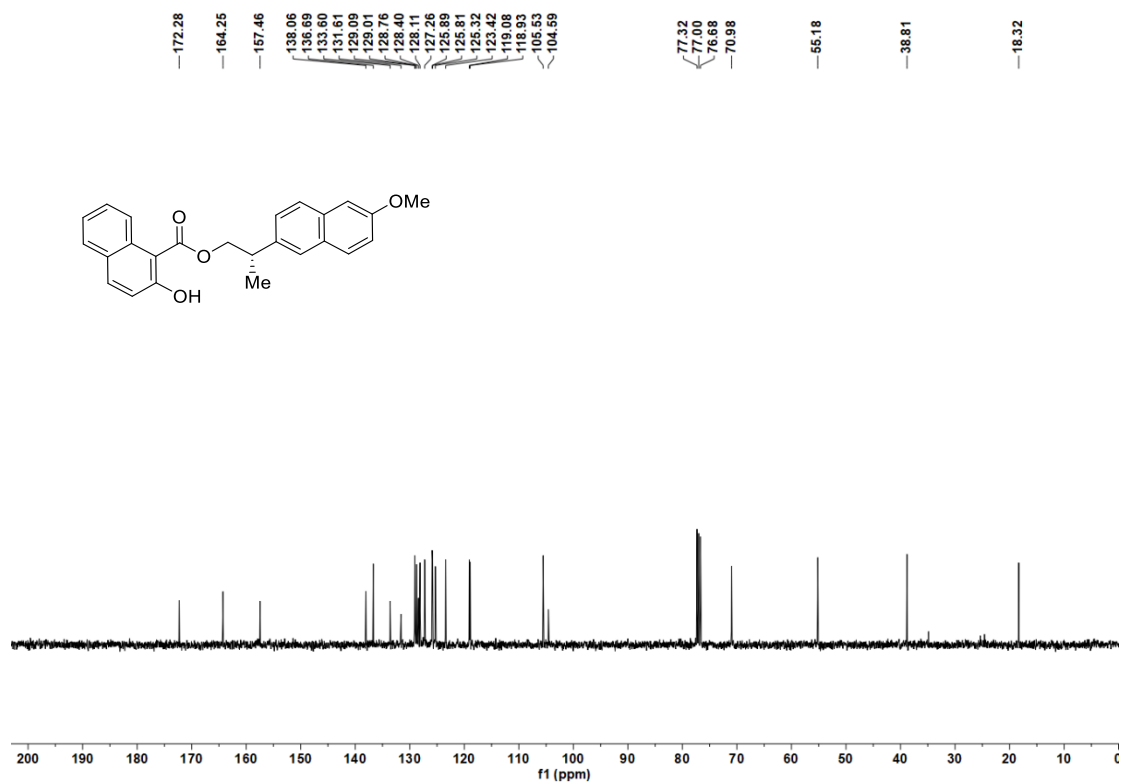

$^1\text{H}$ -NMR (400 MHz,  $\text{CDCl}_3$ ),  $^{13}\text{C}$  NMR (101 MHz,  $\text{CDCl}_3$ ) of **26a**

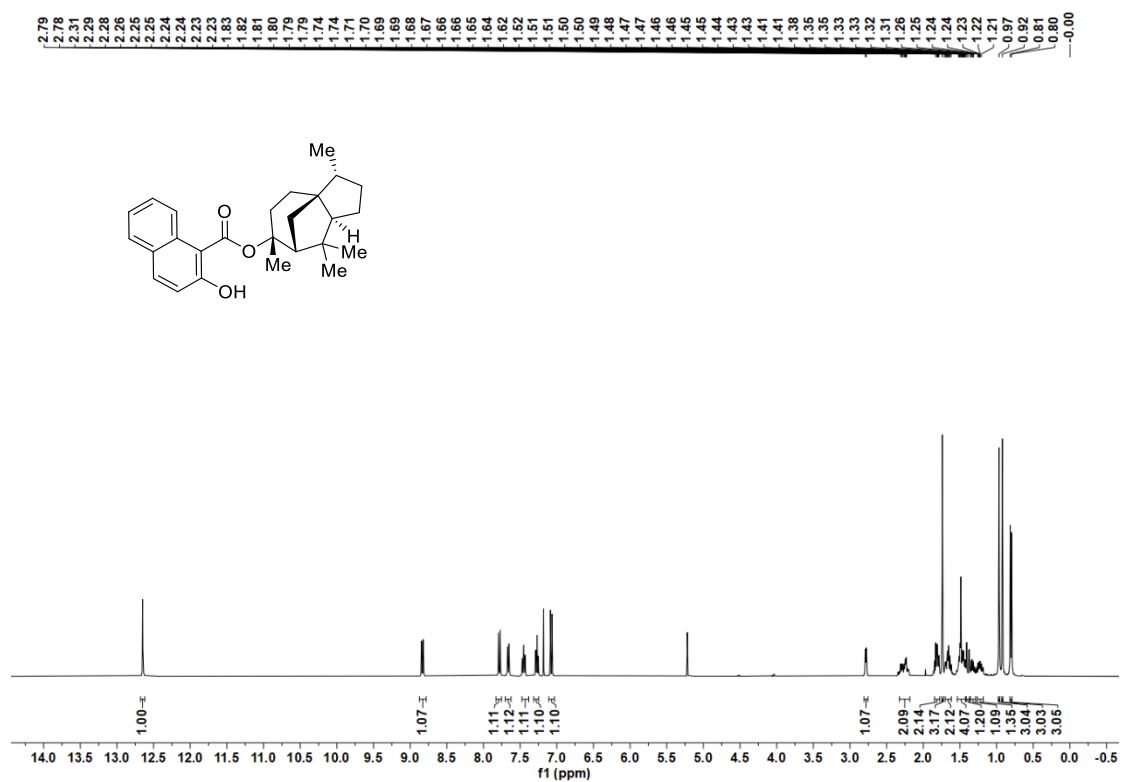

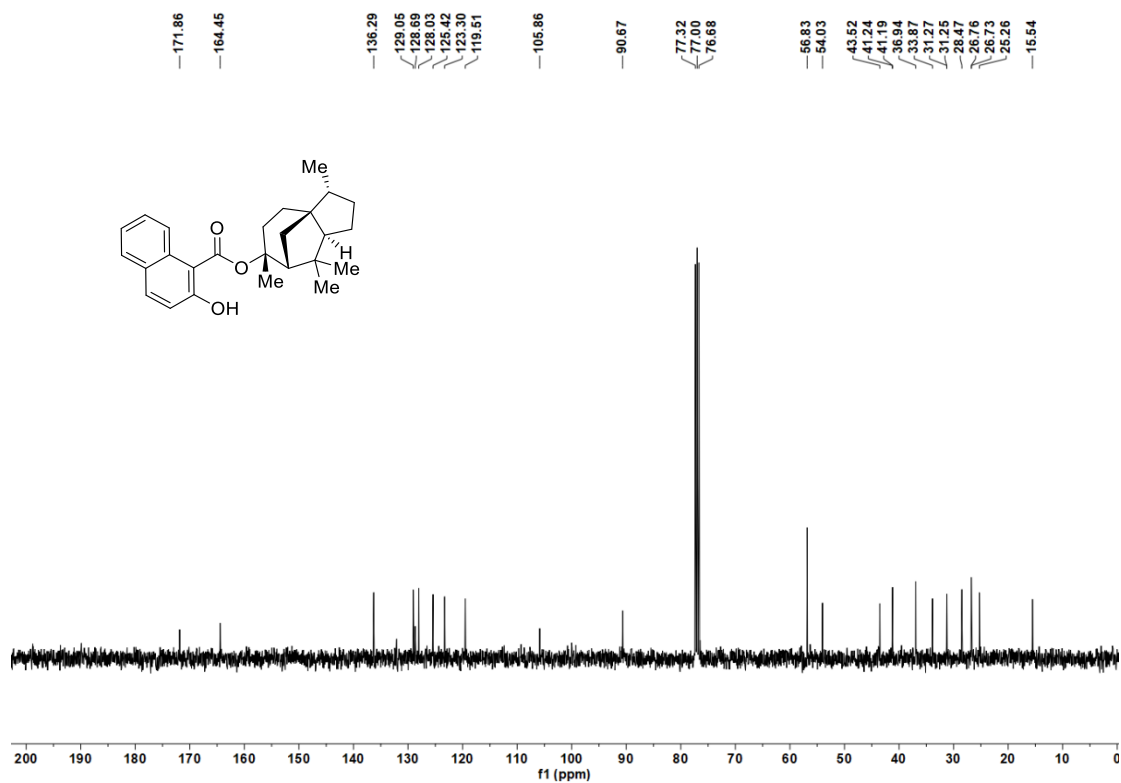

$^1\text{H-NMR}$  (400 MHz,  $\text{CDCl}_3$ ),  $^{13}\text{C NMR}$  (101 MHz,  $\text{CDCl}_3$ ) of **27a**

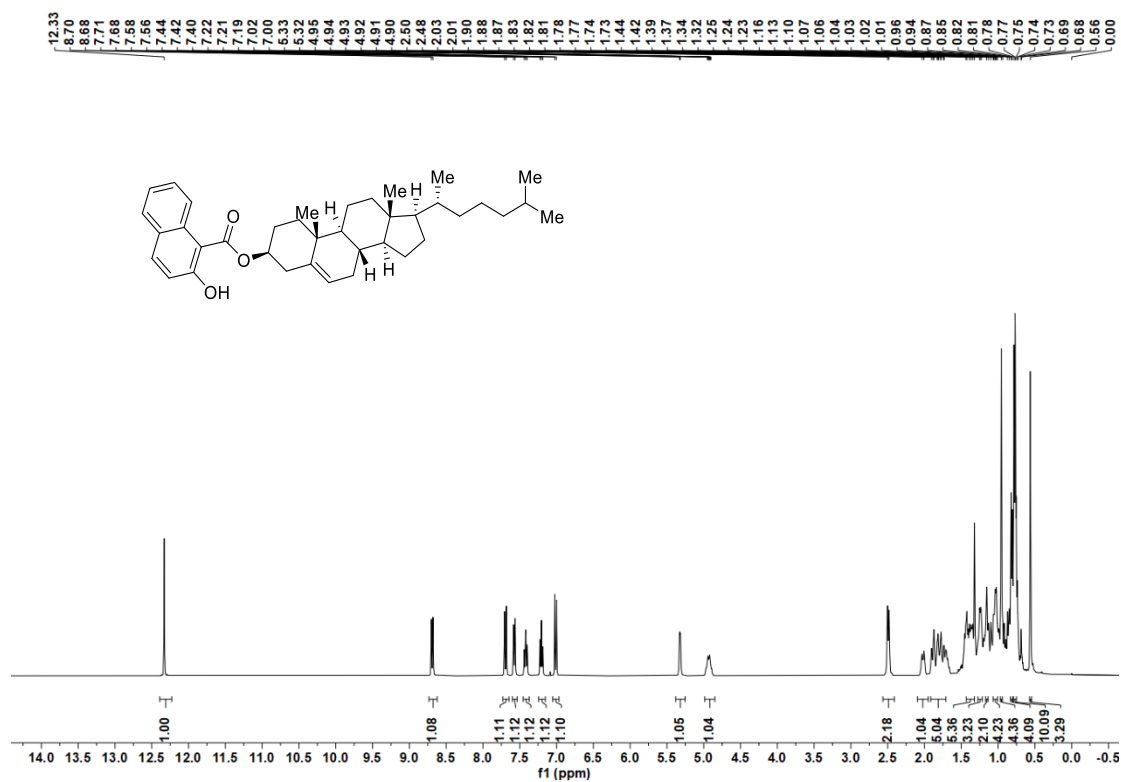

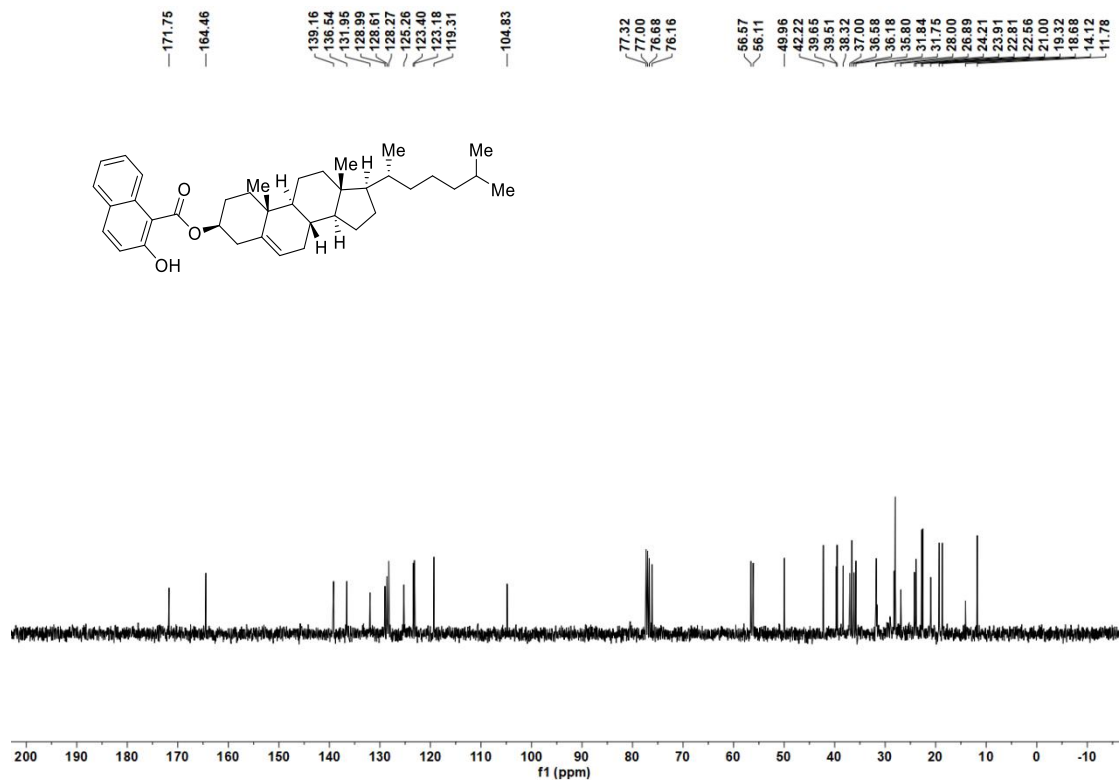

<sup>1</sup>H-NMR (400 MHz, CDCl<sub>3</sub>), <sup>13</sup>C NMR (101 MHz, CDCl<sub>3</sub>) of **28a**

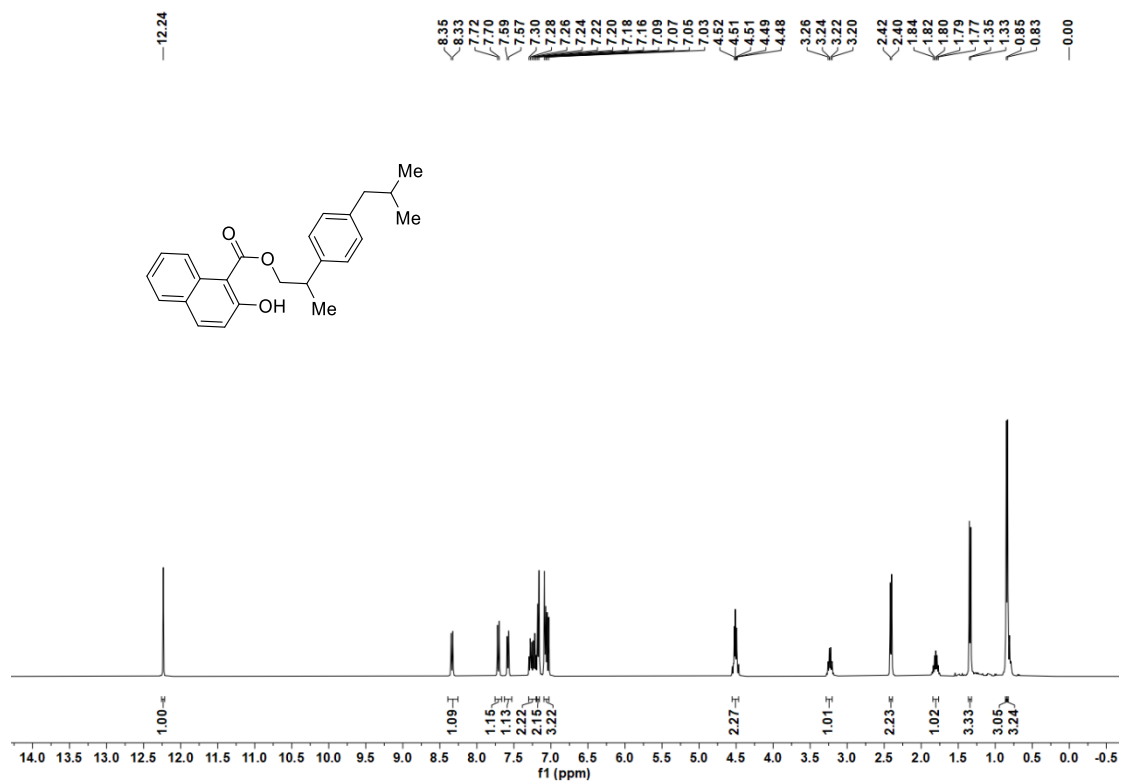

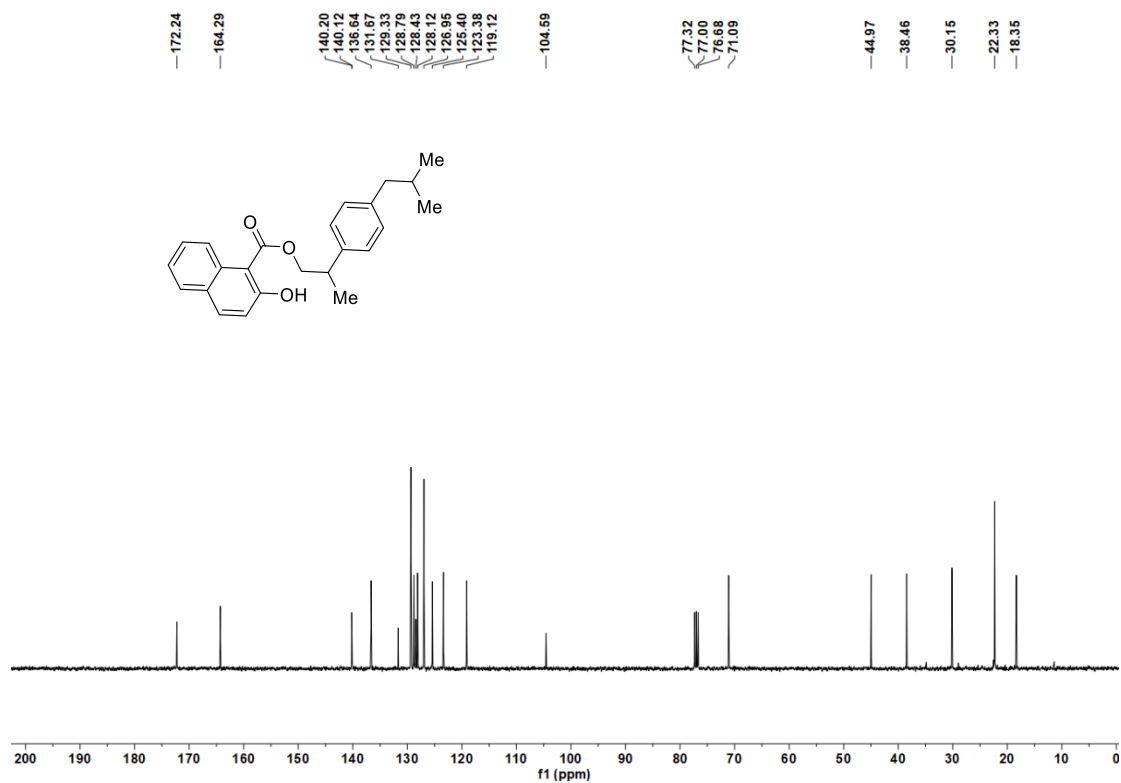

$^1\text{H}$ -NMR (400 MHz,  $\text{CDCl}_3$ ),  $^{13}\text{C}$  NMR (101 MHz,  $\text{CDCl}_3$ ) of **29a**

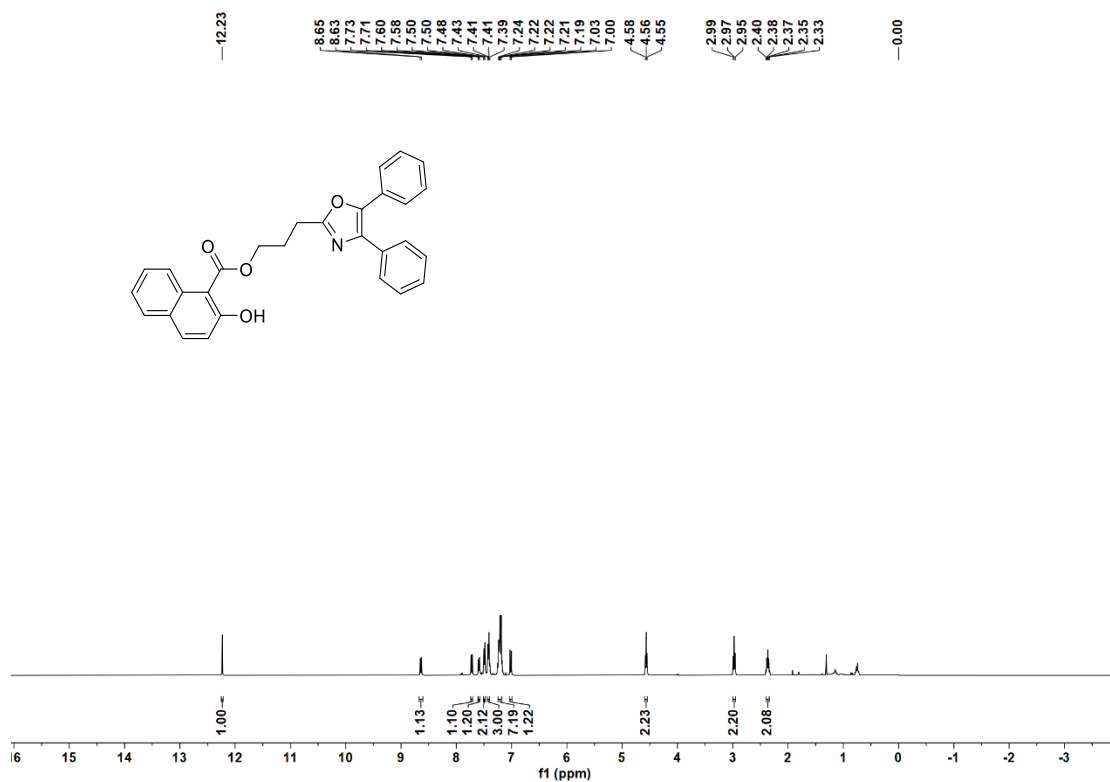

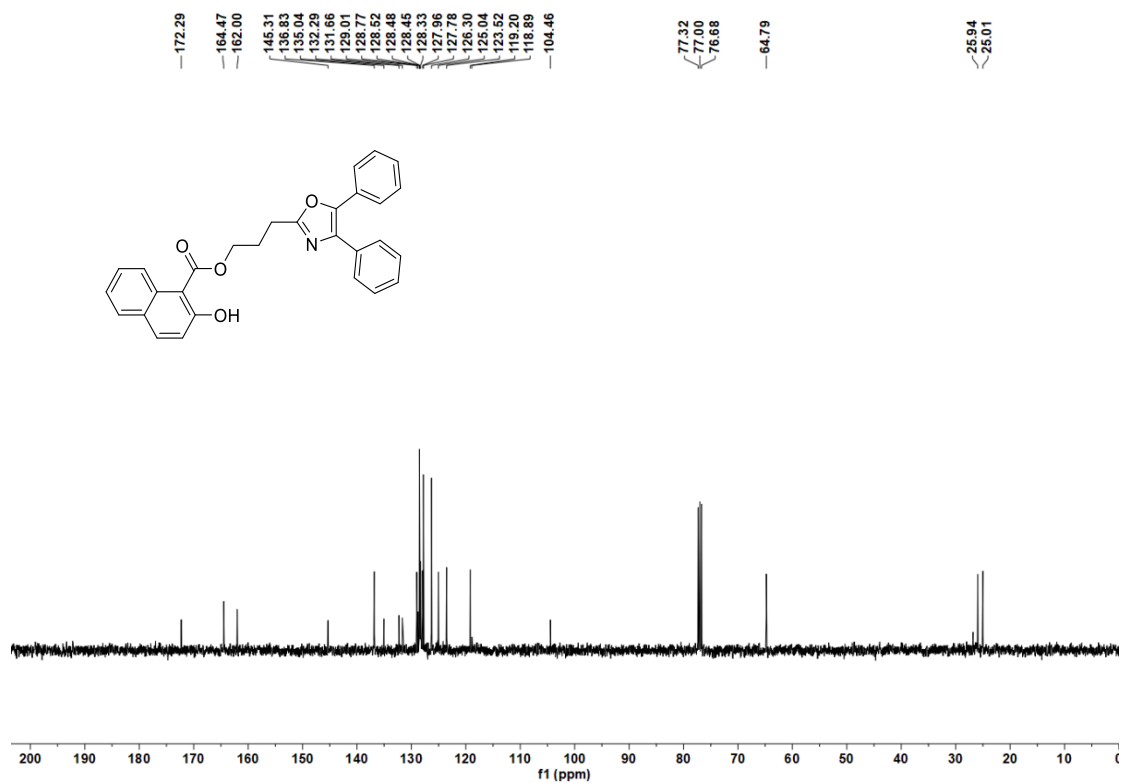

$^1\text{H-NMR}$  (400 MHz,  $\text{CDCl}_3$ ),  $^{13}\text{C NMR}$  (101 MHz,  $\text{CDCl}_3$ ) of **30a**

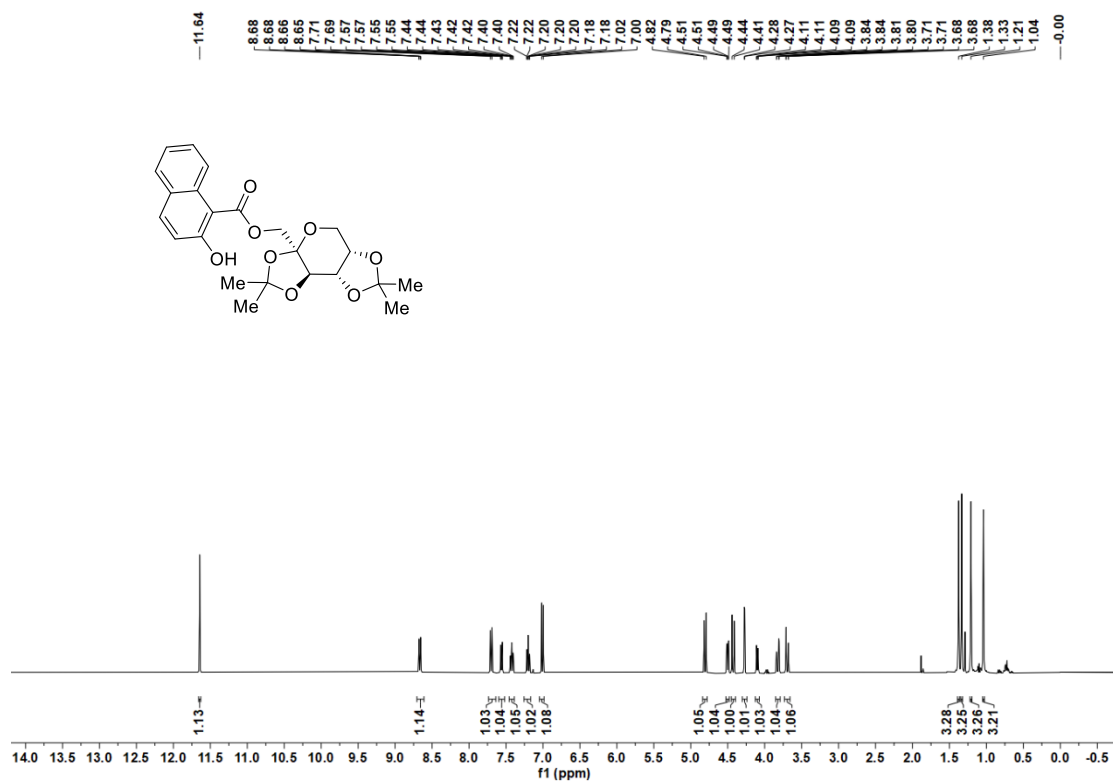

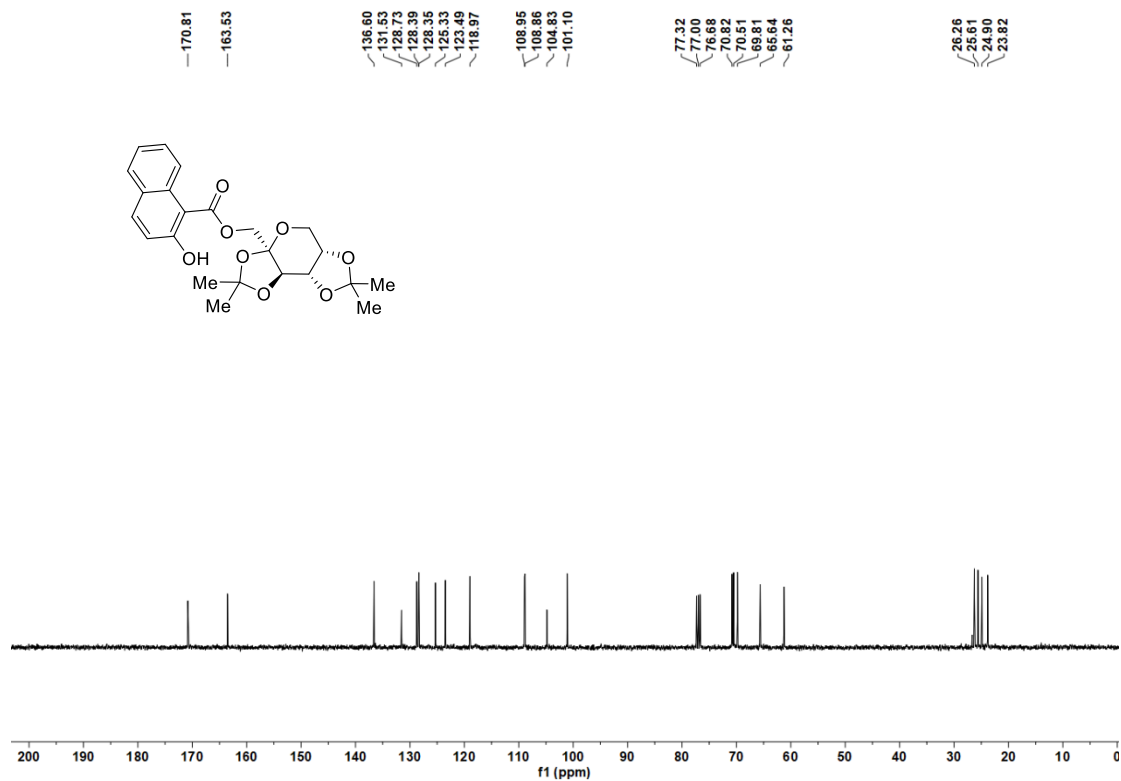

$^1\text{H-NMR}$  (400 MHz,  $\text{CDCl}_3$ ),  $^{13}\text{C NMR}$  (101 MHz,  $\text{CDCl}_3$ ) of **31a**

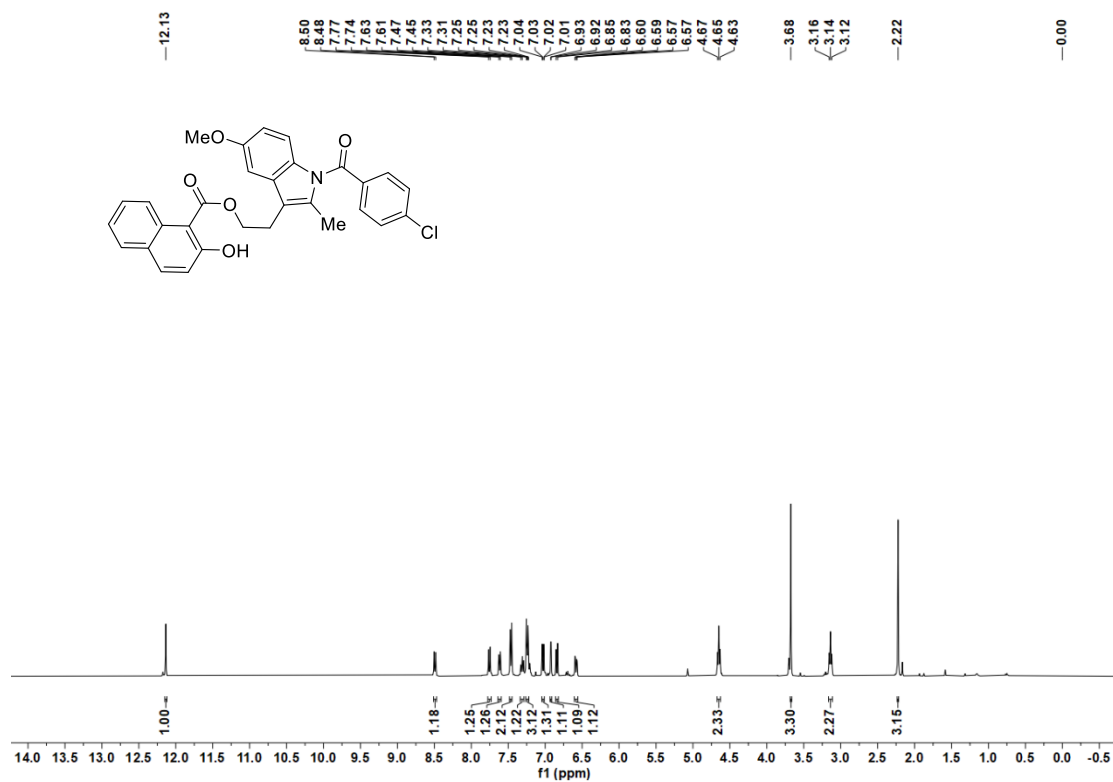

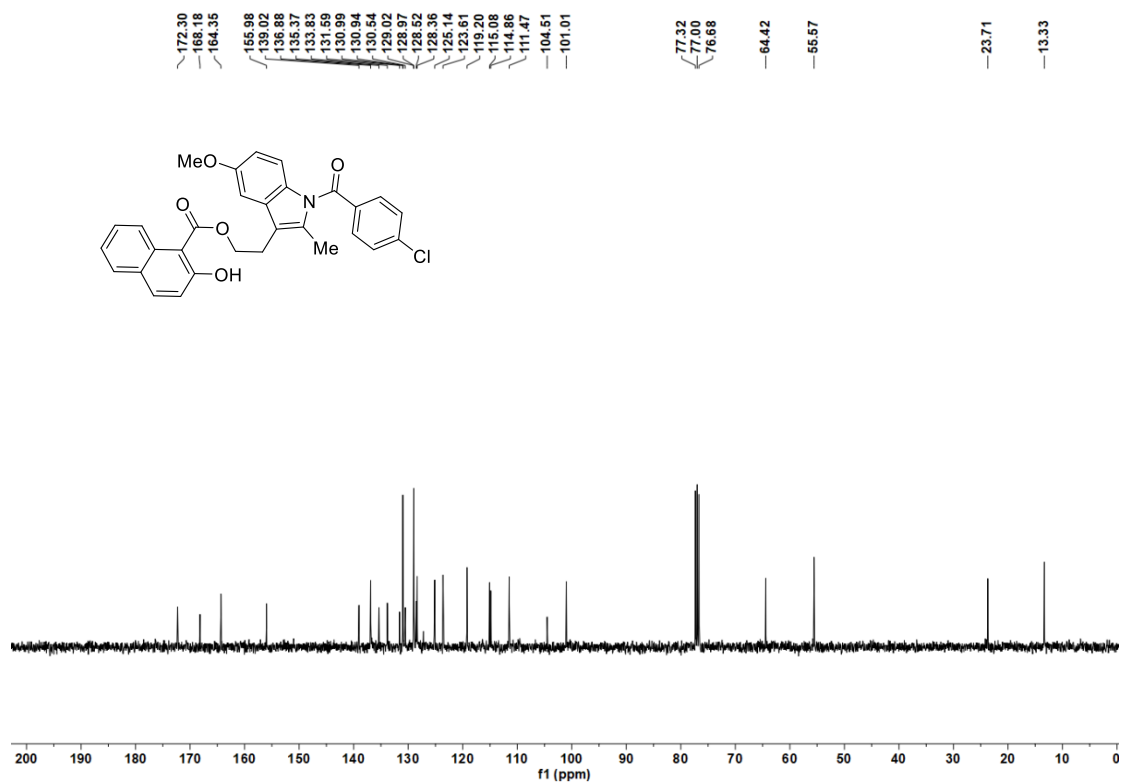

$^{13}\text{C}$  NMR (101 MHz,  $\text{CDCl}_3$ ) of **32a**

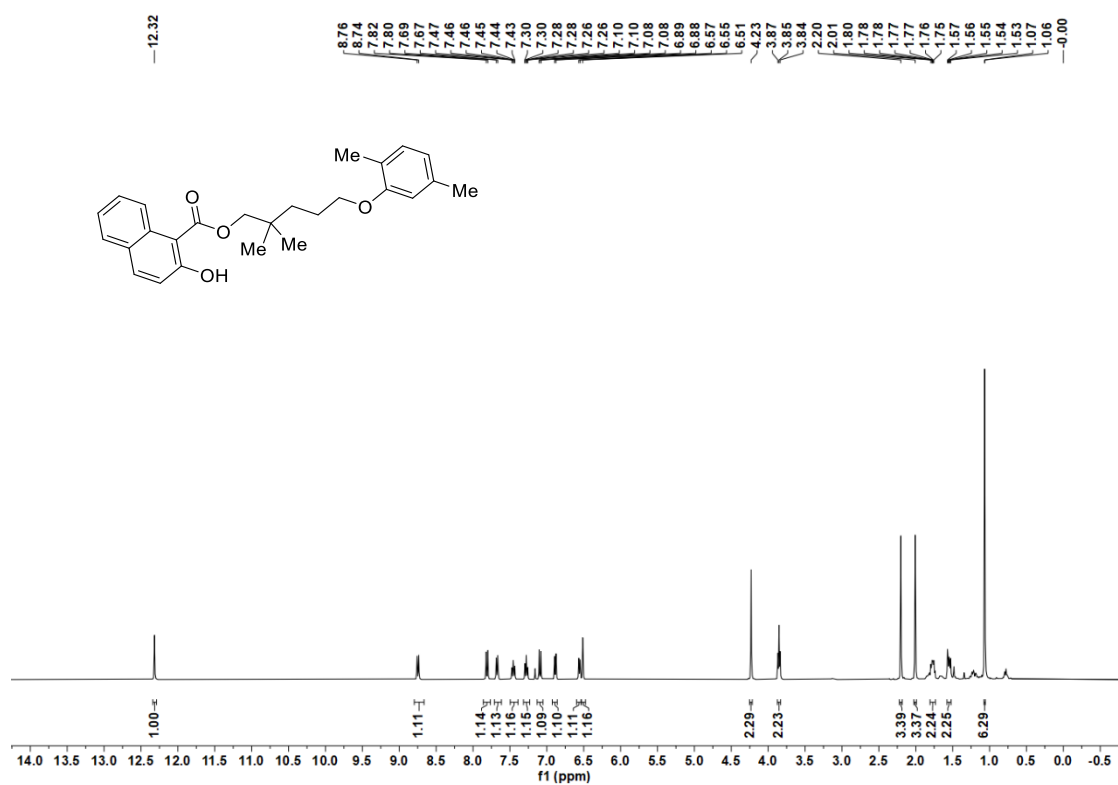



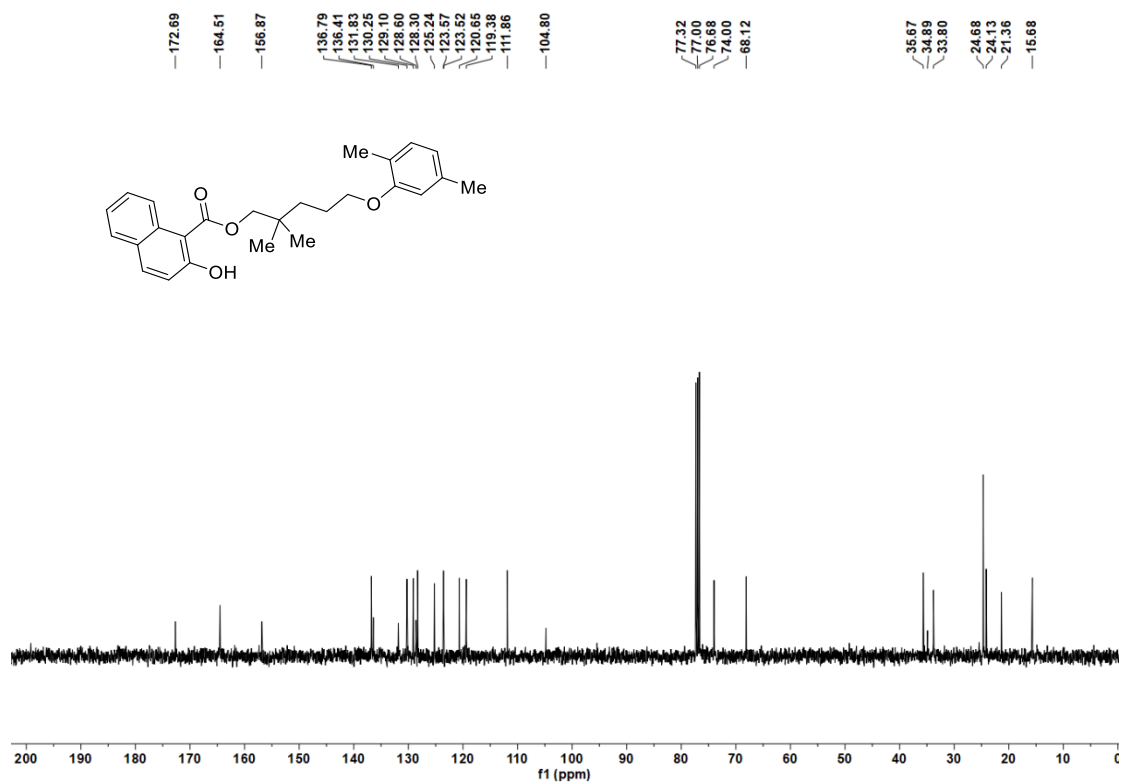

$^1\text{H}$ -NMR (400 MHz,  $\text{CDCl}_3$ ),  $^{13}\text{C}$  NMR (101 MHz,  $\text{CDCl}_3$ ) of **33a**

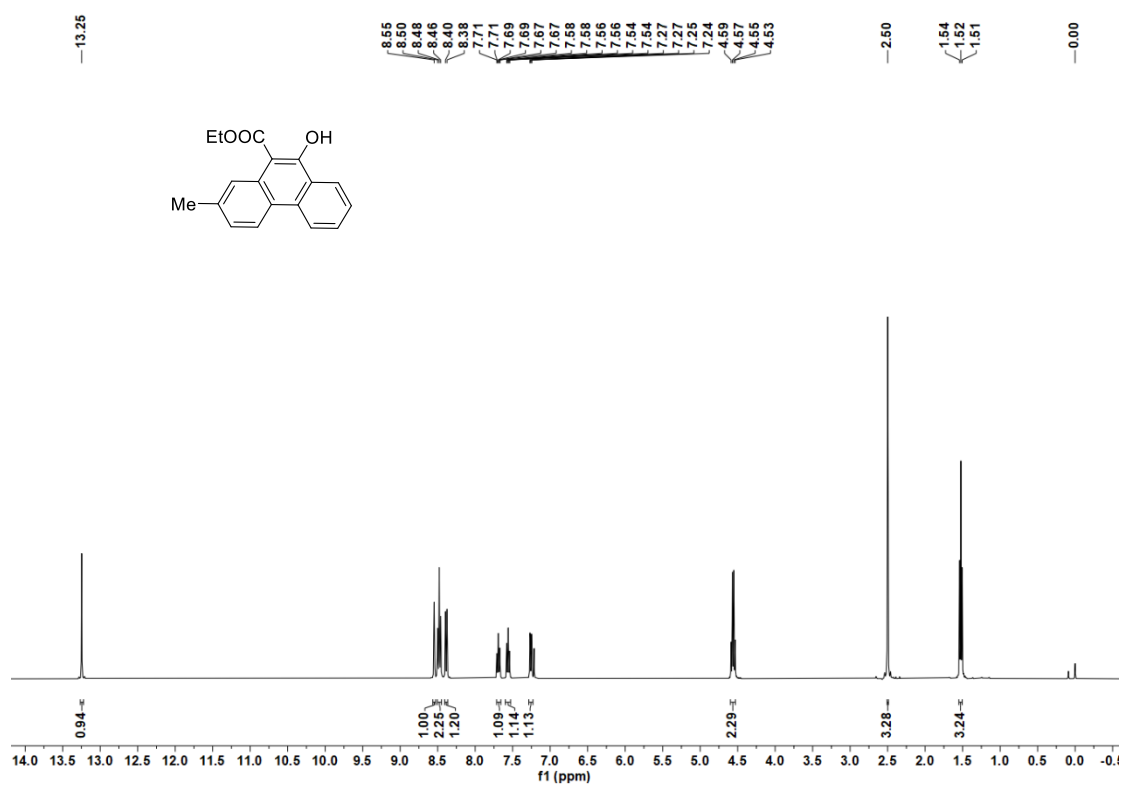

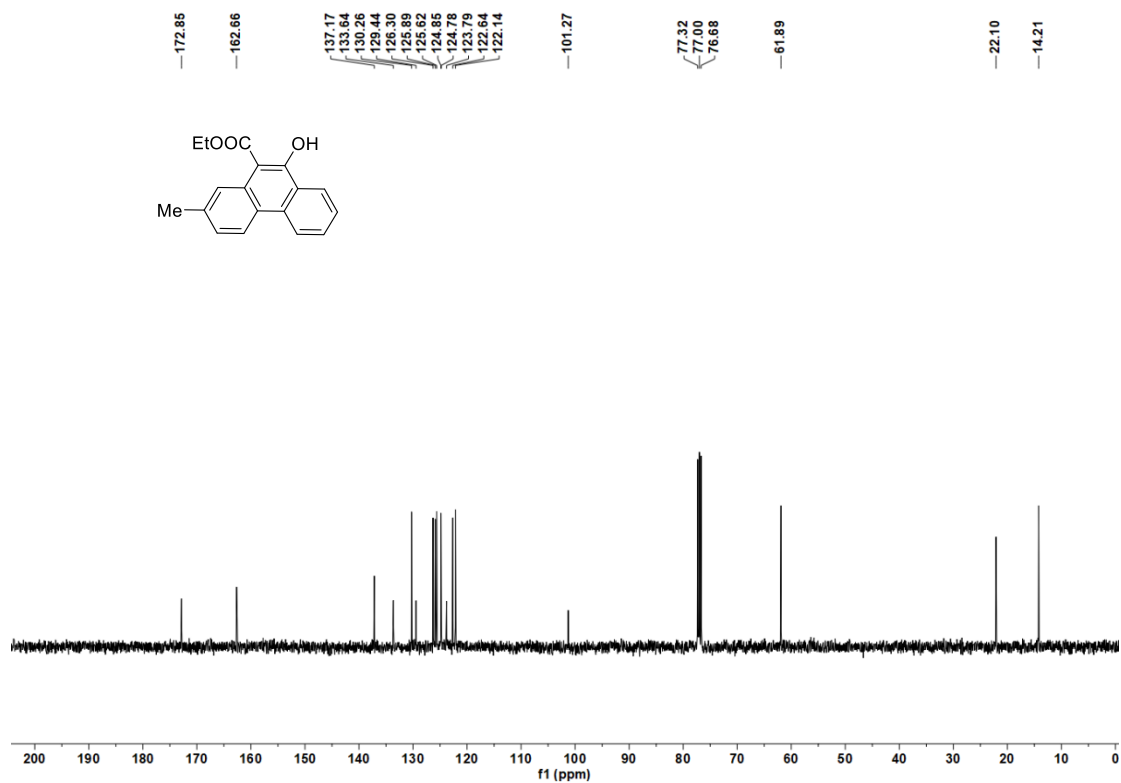

$^1\text{H}$ -NMR (400 MHz,  $\text{CDCl}_3$ ),  $^{13}\text{C}$  NMR (101 MHz,  $\text{CDCl}_3$ ) of **34a**

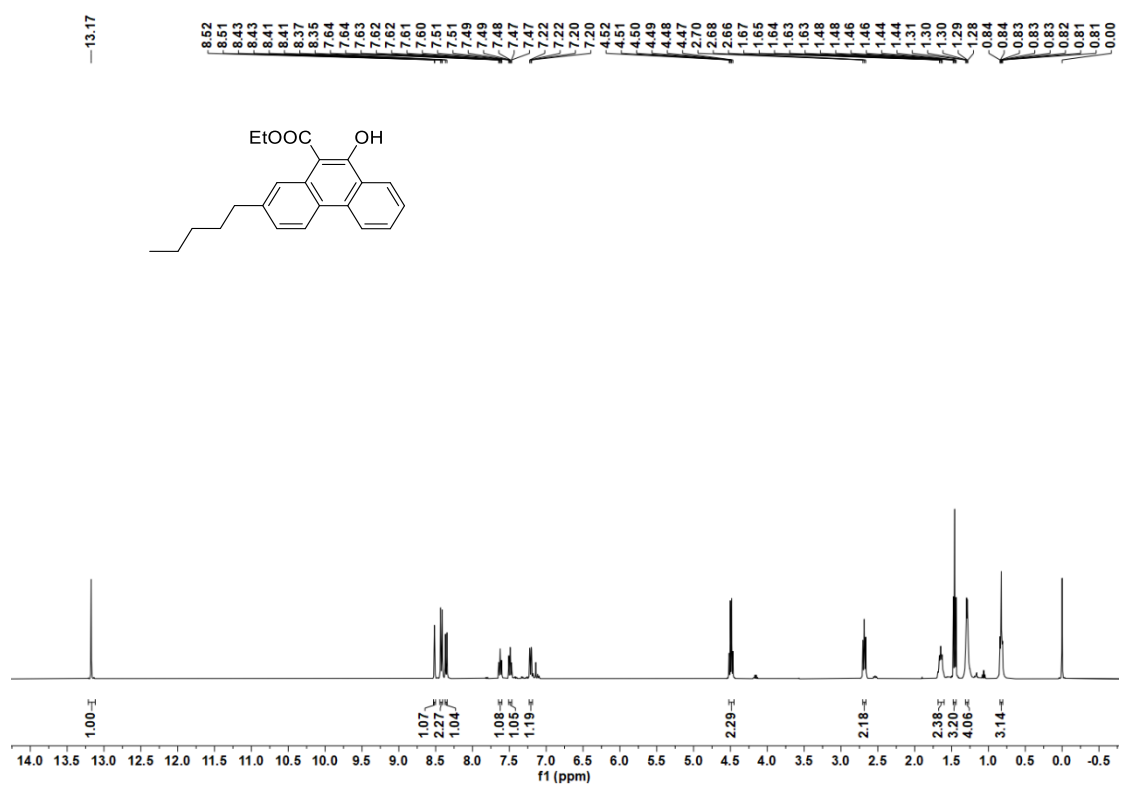

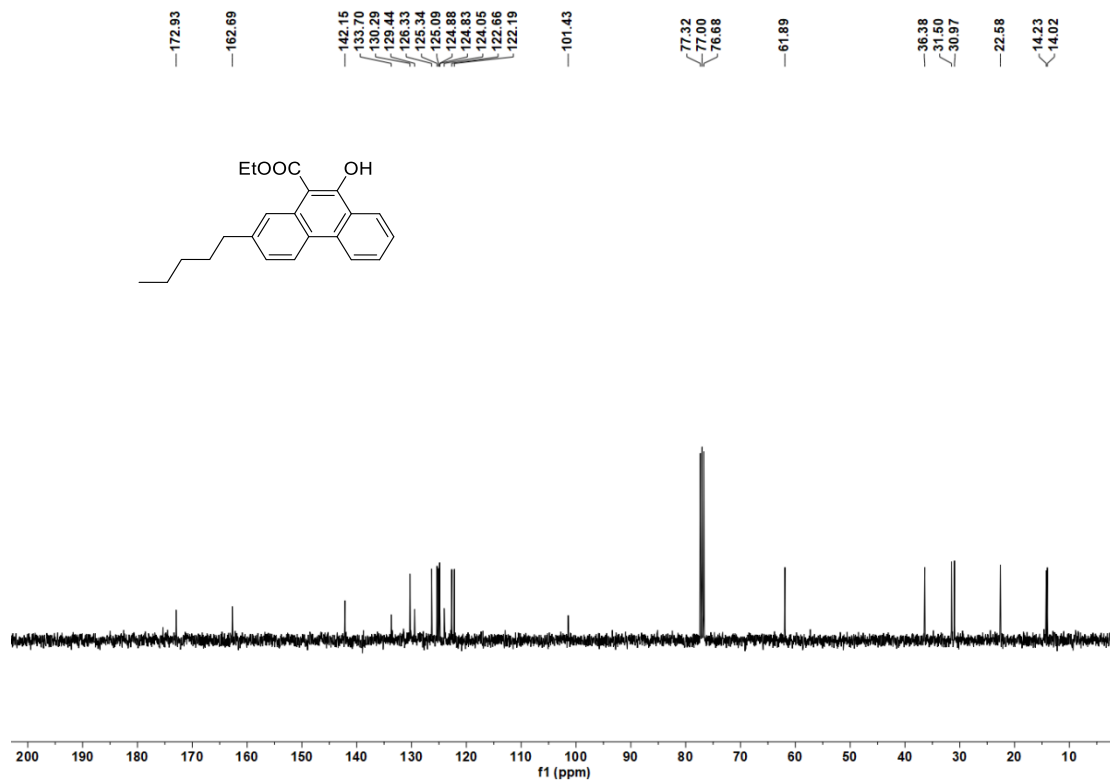

$^1\text{H-NMR}$  (400 MHz,  $\text{CDCl}_3$ ),  $^{13}\text{C NMR}$  (101 MHz,  $\text{CDCl}_3$ ) of **35a**

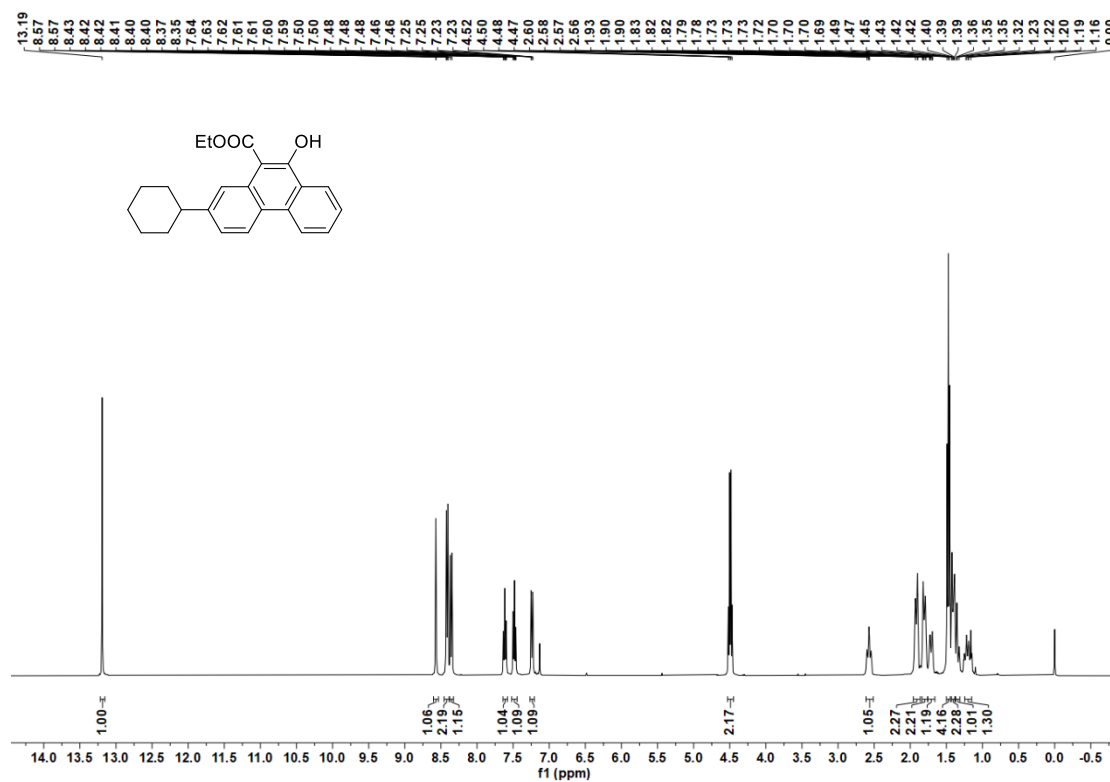

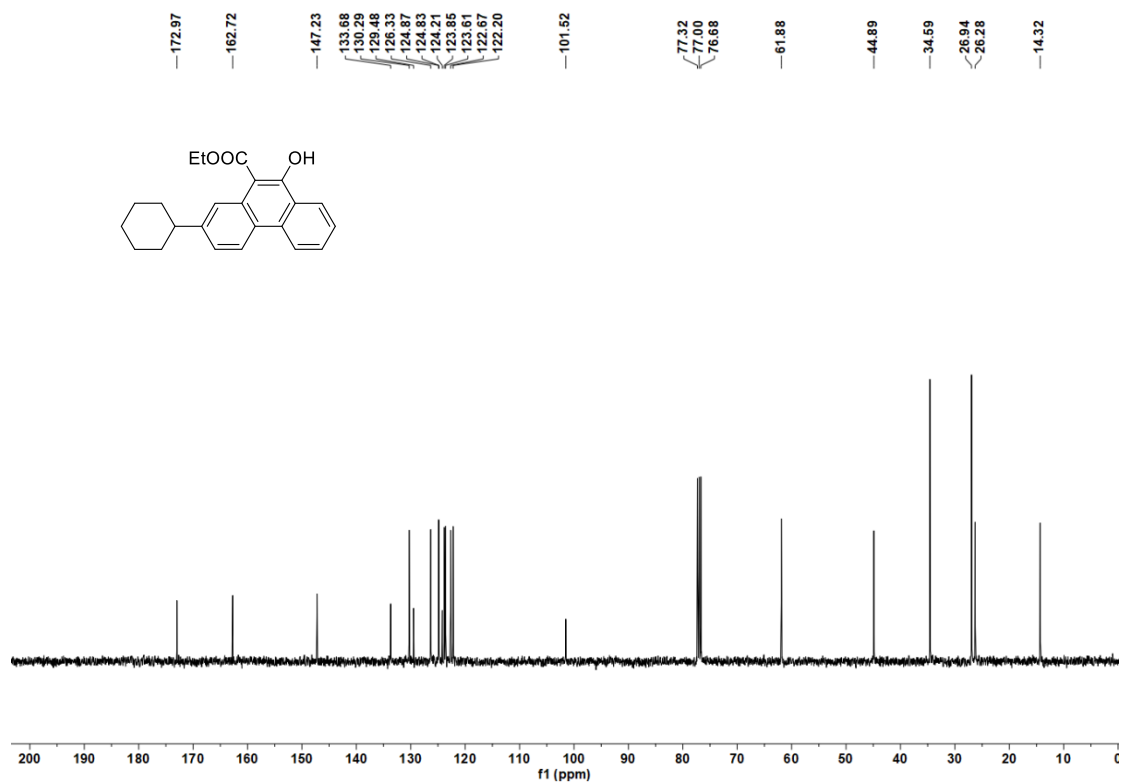

<sup>1</sup>H-NMR (400 MHz, CDCl<sub>3</sub>), <sup>13</sup>C NMR (101 MHz, CDCl<sub>3</sub>) of **36a**

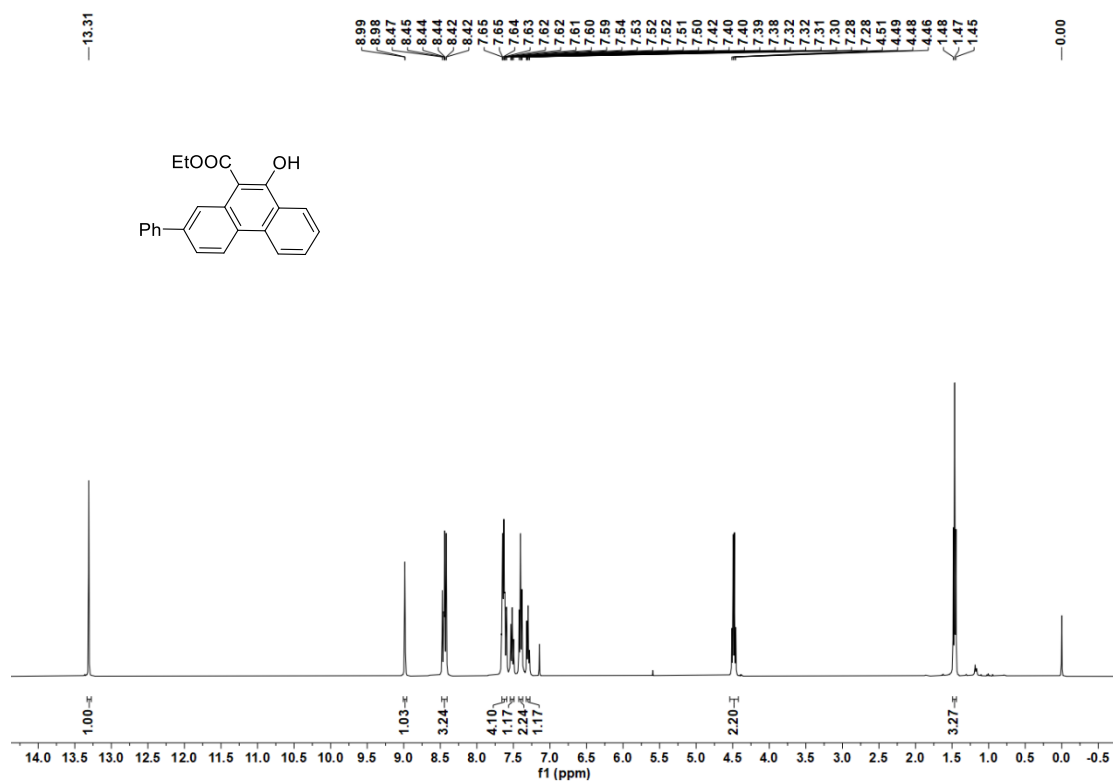

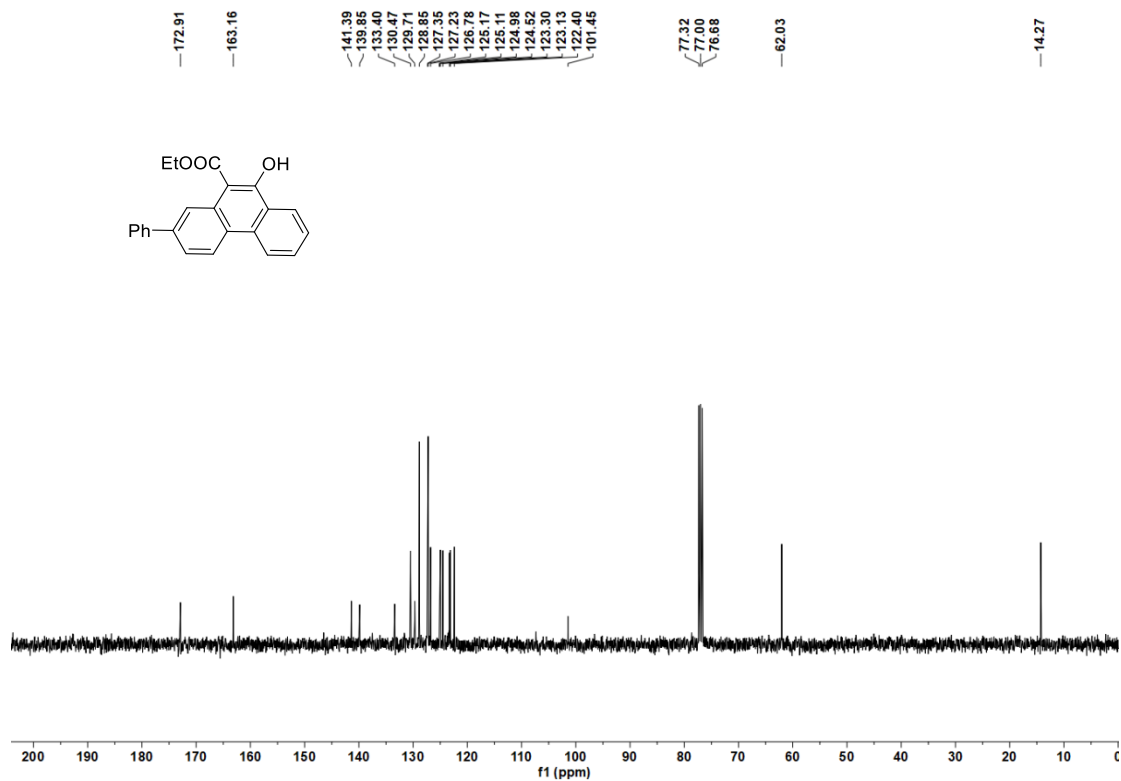

$^1\text{H-NMR}$  (400 MHz,  $\text{CDCl}_3$ ),  $^{13}\text{C NMR}$  (101 MHz,  $\text{CDCl}_3$ ) of **37a**

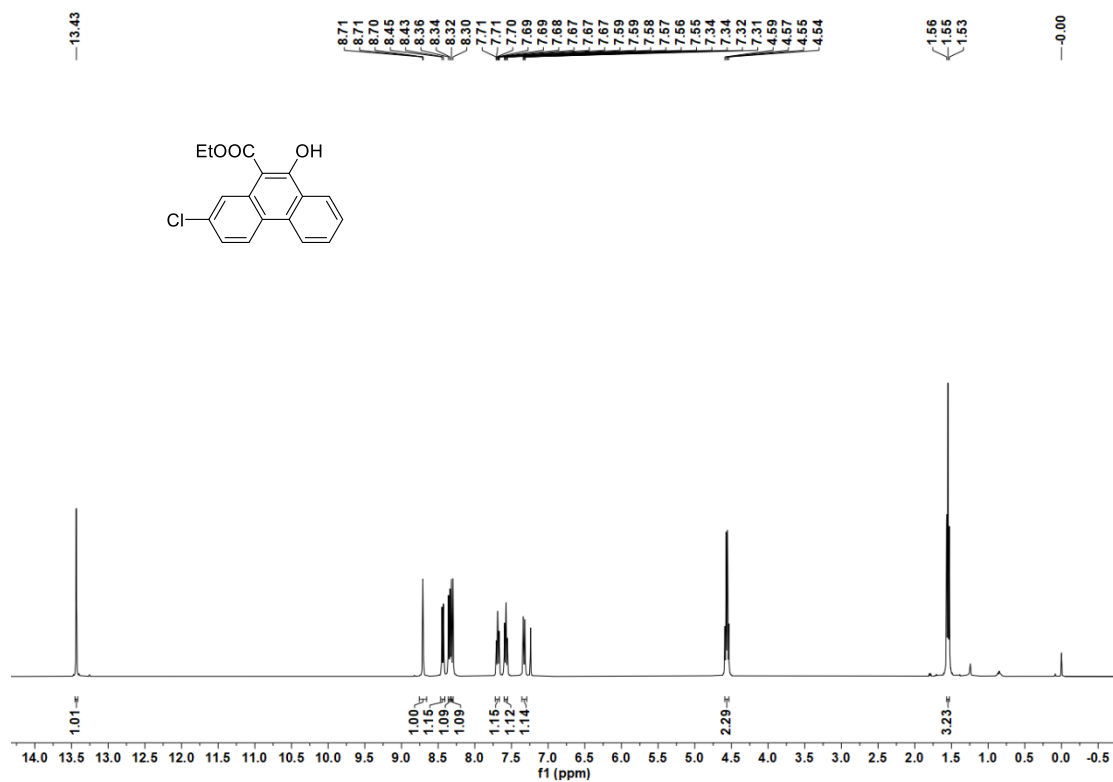

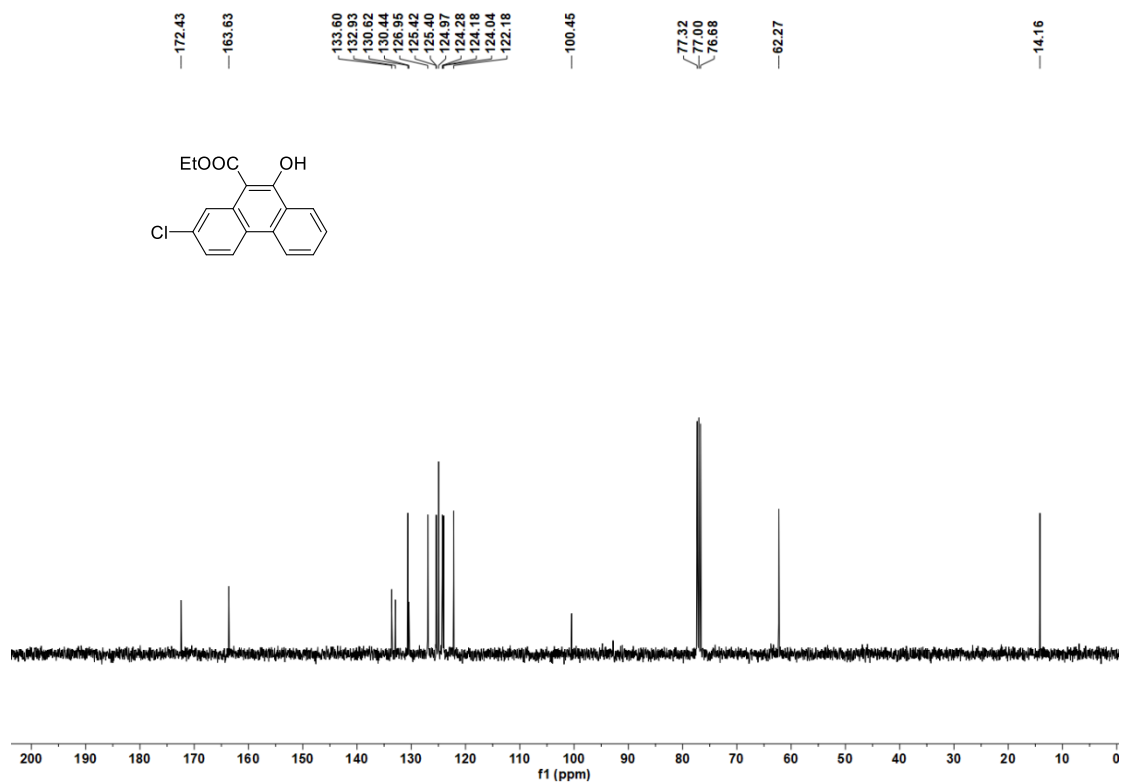

$^1\text{H-NMR}$  (400 MHz,  $\text{CDCl}_3$ ),  $^{13}\text{C NMR}$  (101 MHz,  $\text{CDCl}_3$ ) of **38a**

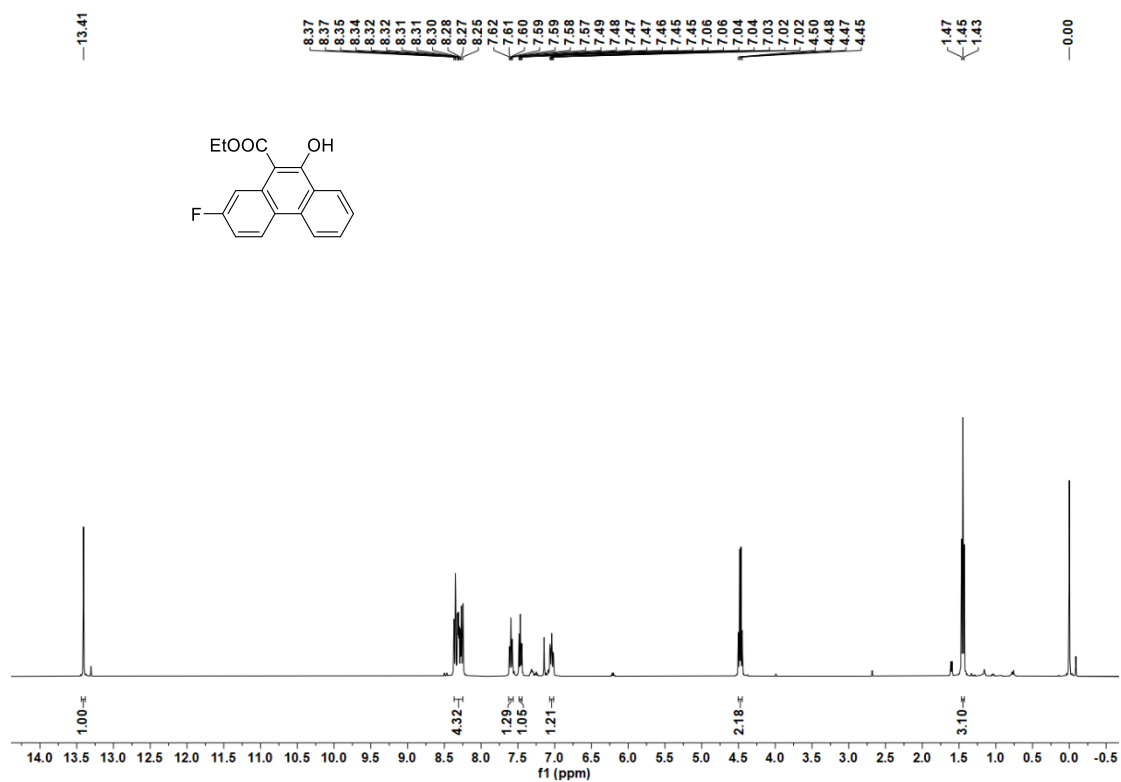

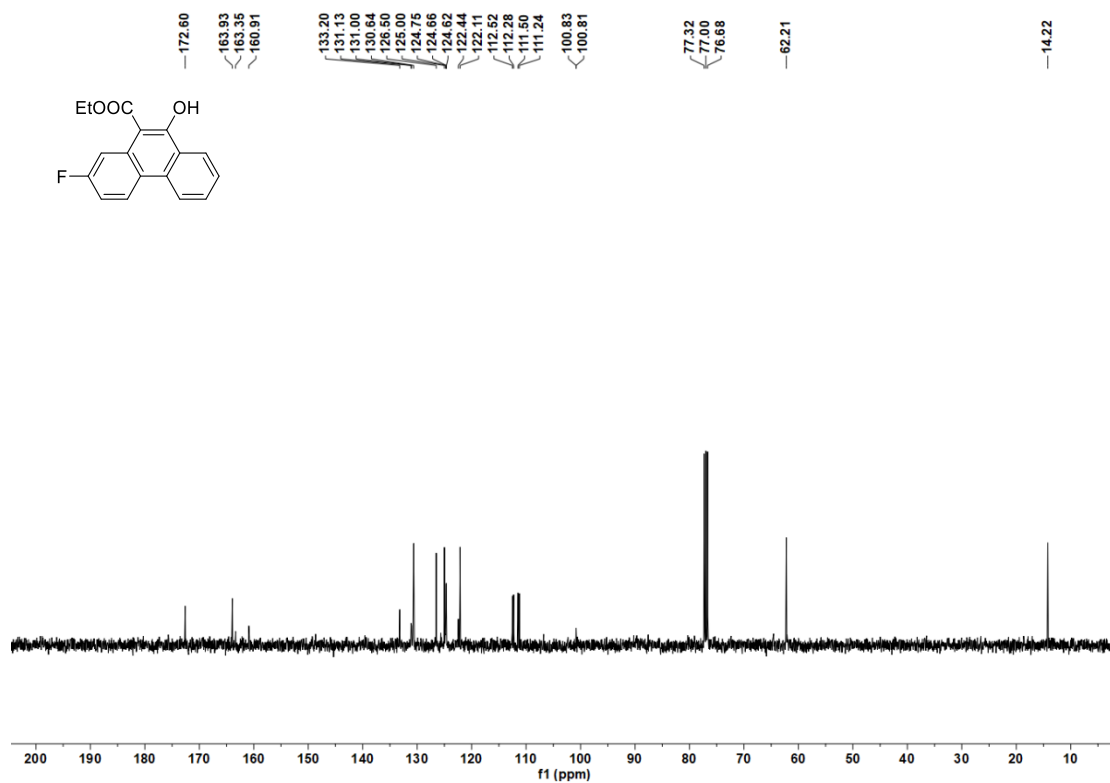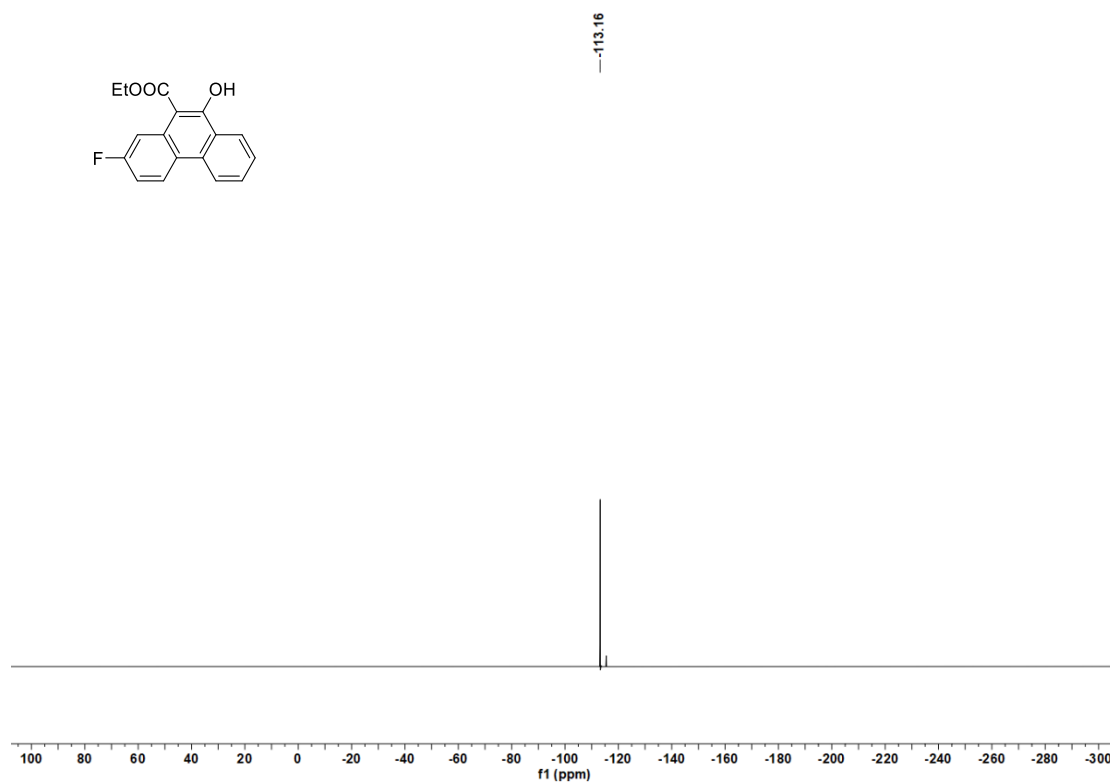

$^1\text{H-NMR}$  (400 MHz,  $\text{CDCl}_3$ ),  $^{13}\text{C NMR}$  (101 MHz,  $\text{CDCl}_3$ ),  $^{19}\text{F-NMR}$  (376 MHz,  $\text{CDCl}_3$ ) of **39a**

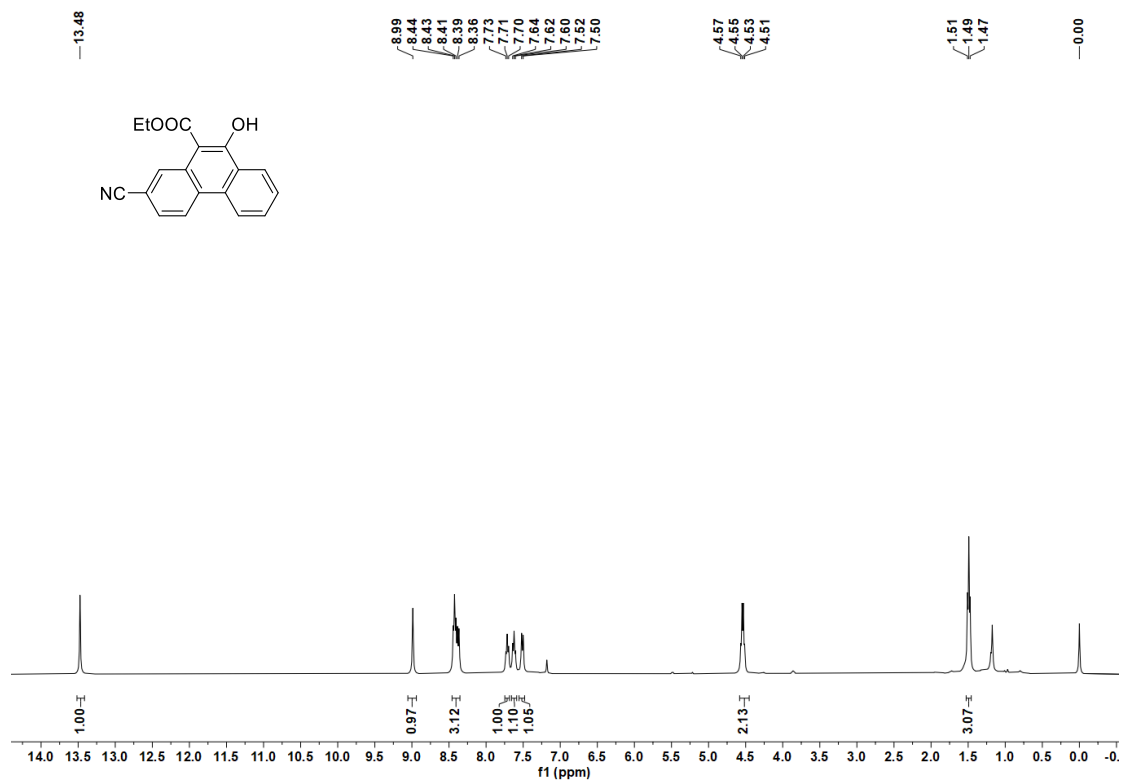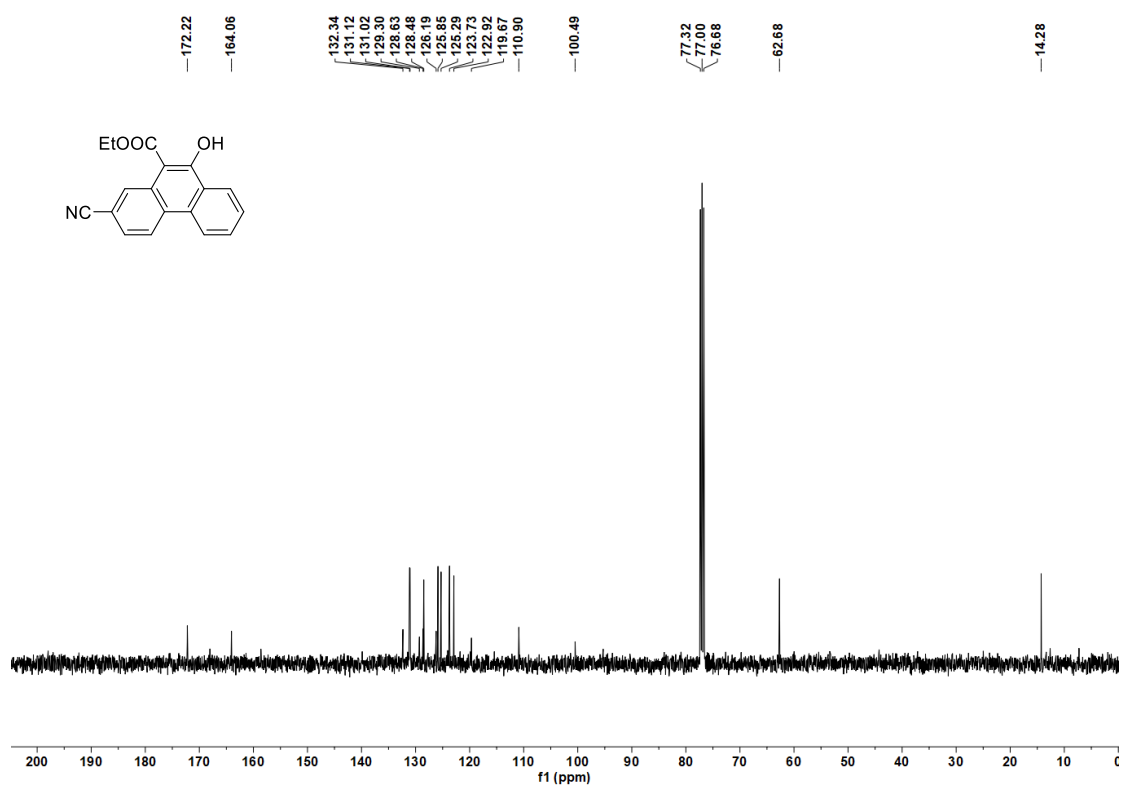

$^1\text{H-NMR}$  (400 MHz,  $\text{CDCl}_3$ ),  $^{13}\text{C-NMR}$  (101 MHz,  $\text{CDCl}_3$ ) of 40a



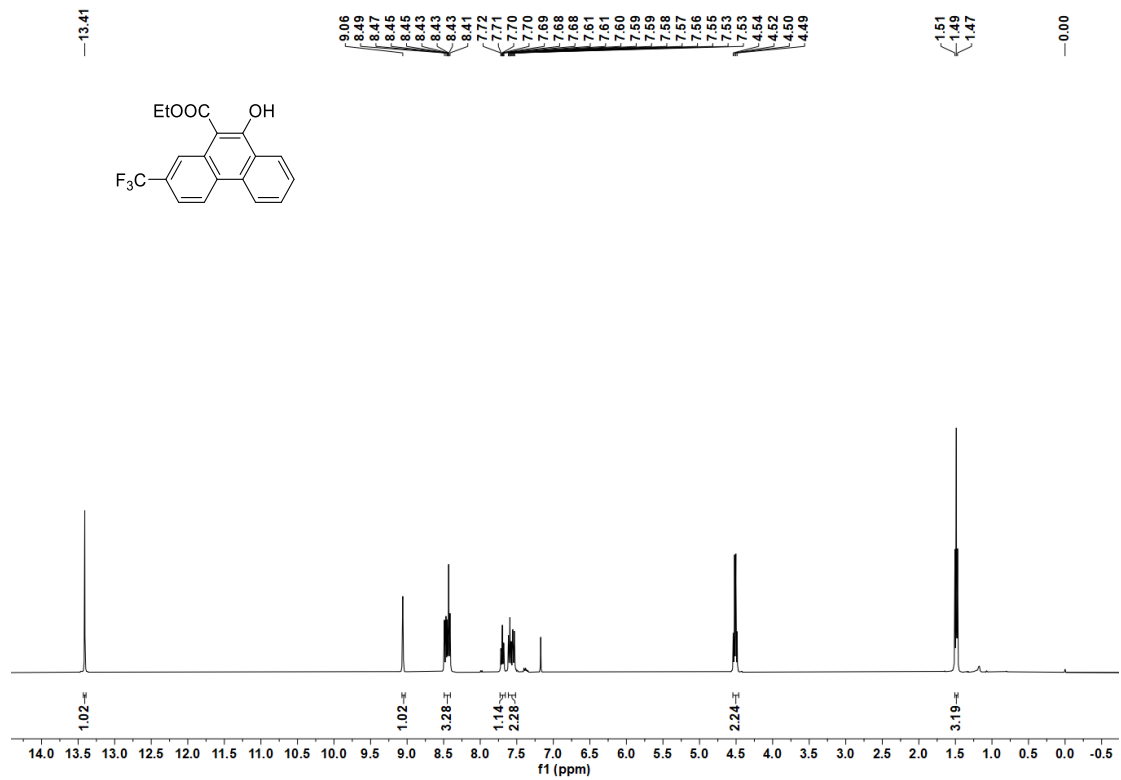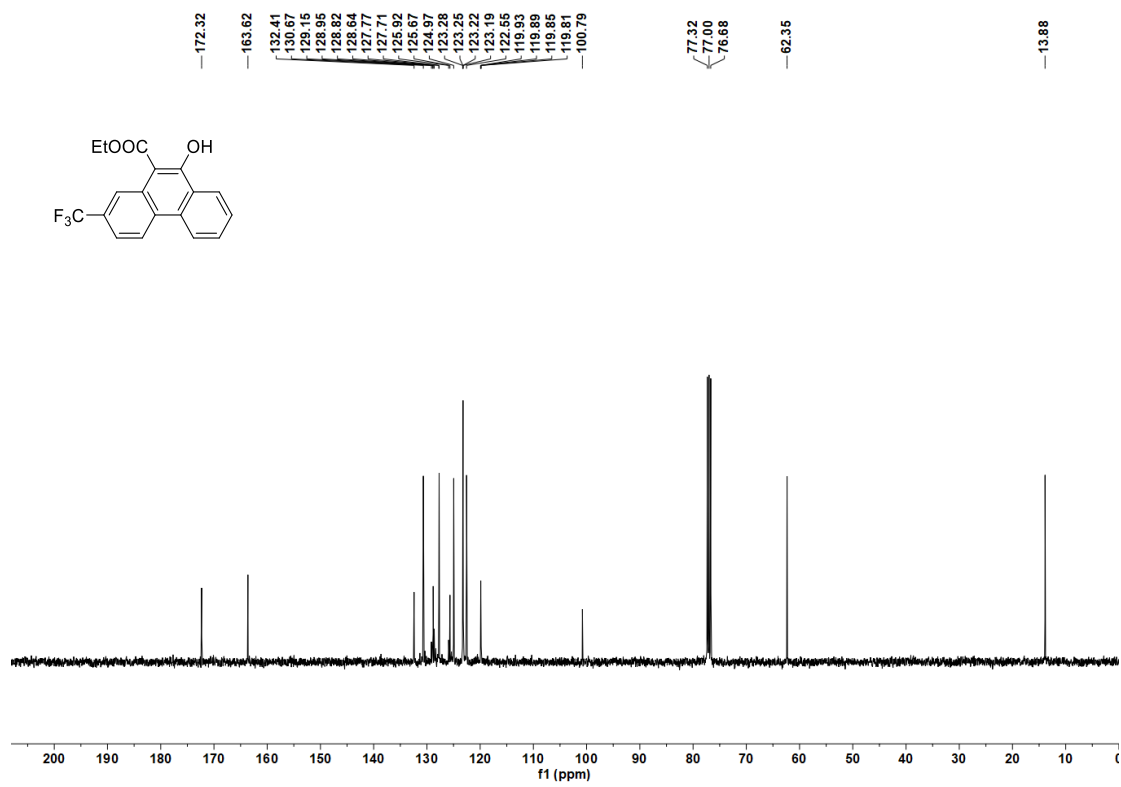

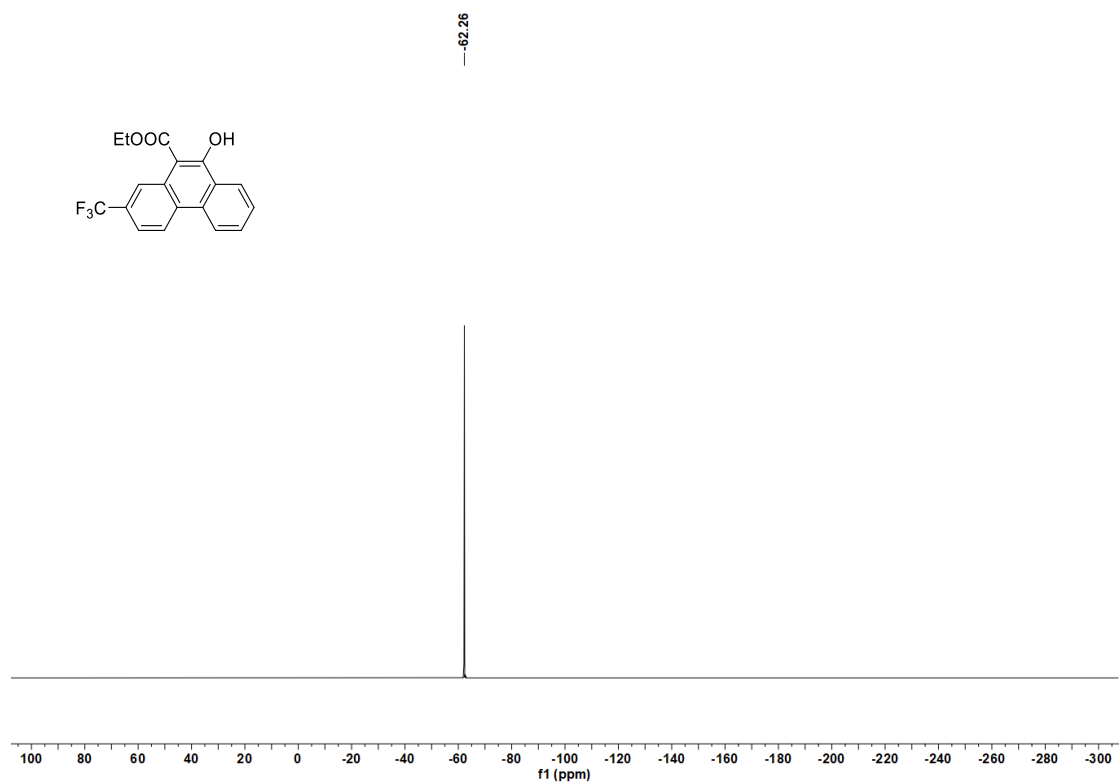

$^1\text{H-NMR}$  (400 MHz,  $\text{CDCl}_3$ ),  $^{13}\text{C-NMR}$  (101 MHz,  $\text{CDCl}_3$ ),  $^{19}\text{F-NMR}$  (376 MHz,  $\text{CDCl}_3$ ) of **41a**

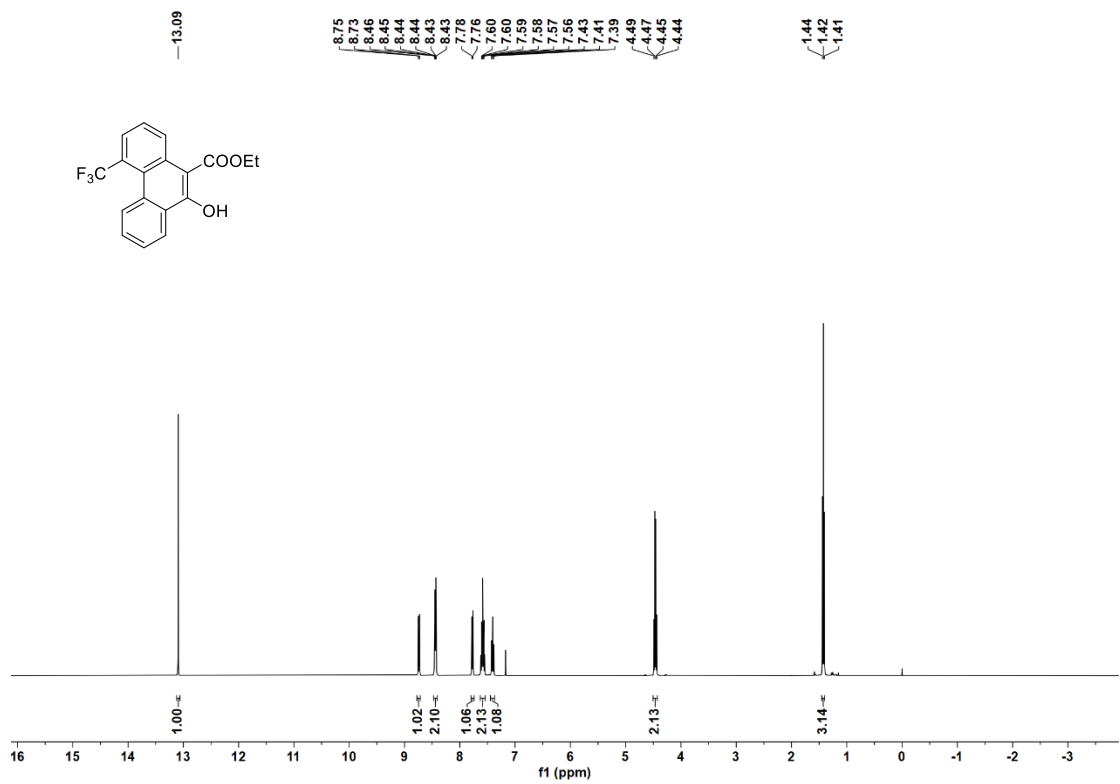

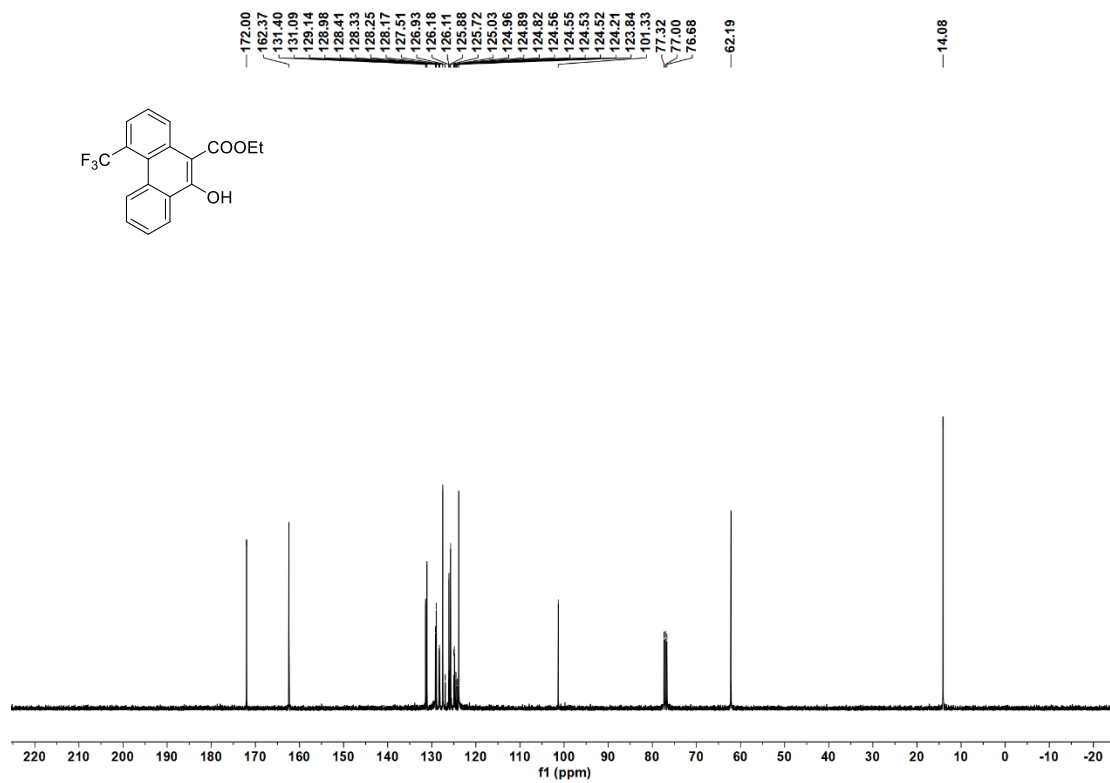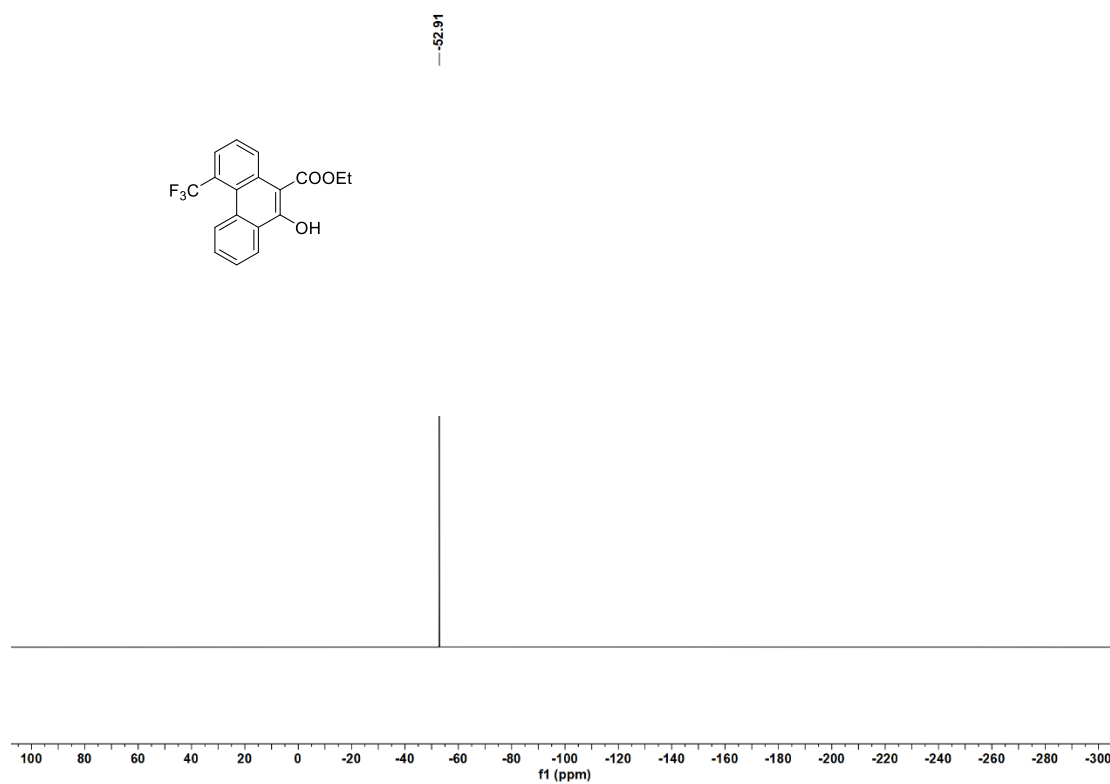

**<sup>1</sup>H-NMR** (400 MHz, CDCl<sub>3</sub>), **<sup>13</sup>C NMR** (101 MHz, CDCl<sub>3</sub>), **<sup>19</sup>F-NMR** (376 MHz, CDCl<sub>3</sub>) of **42a**

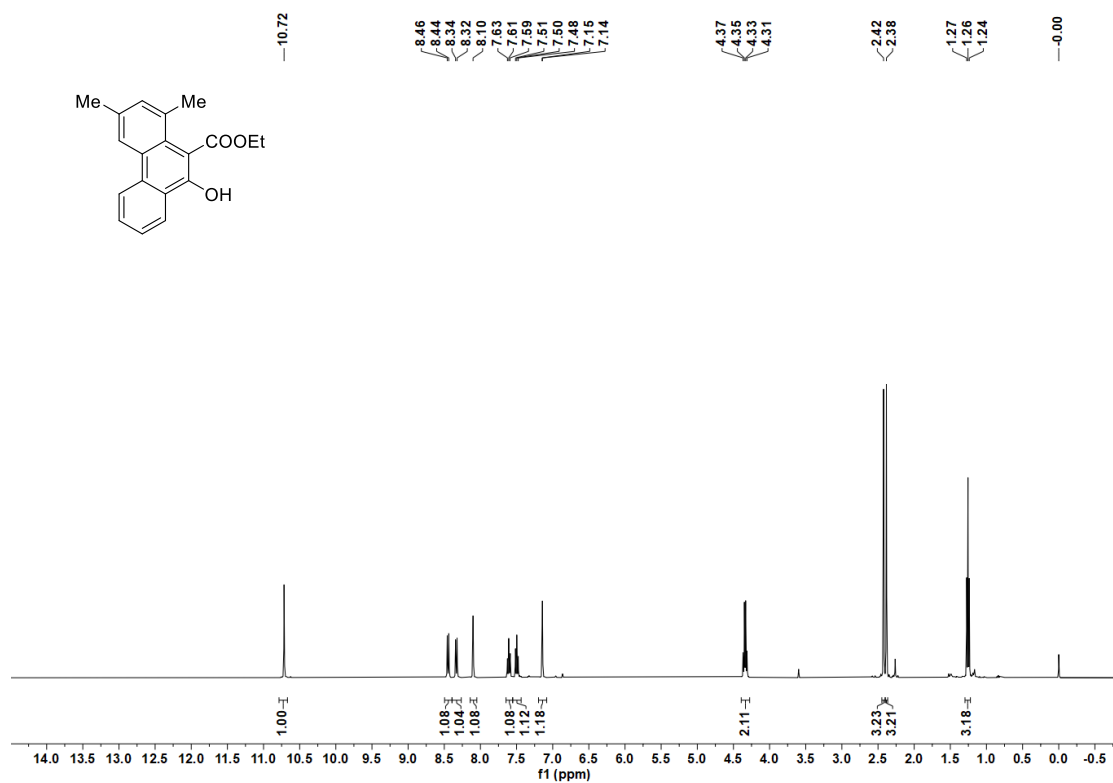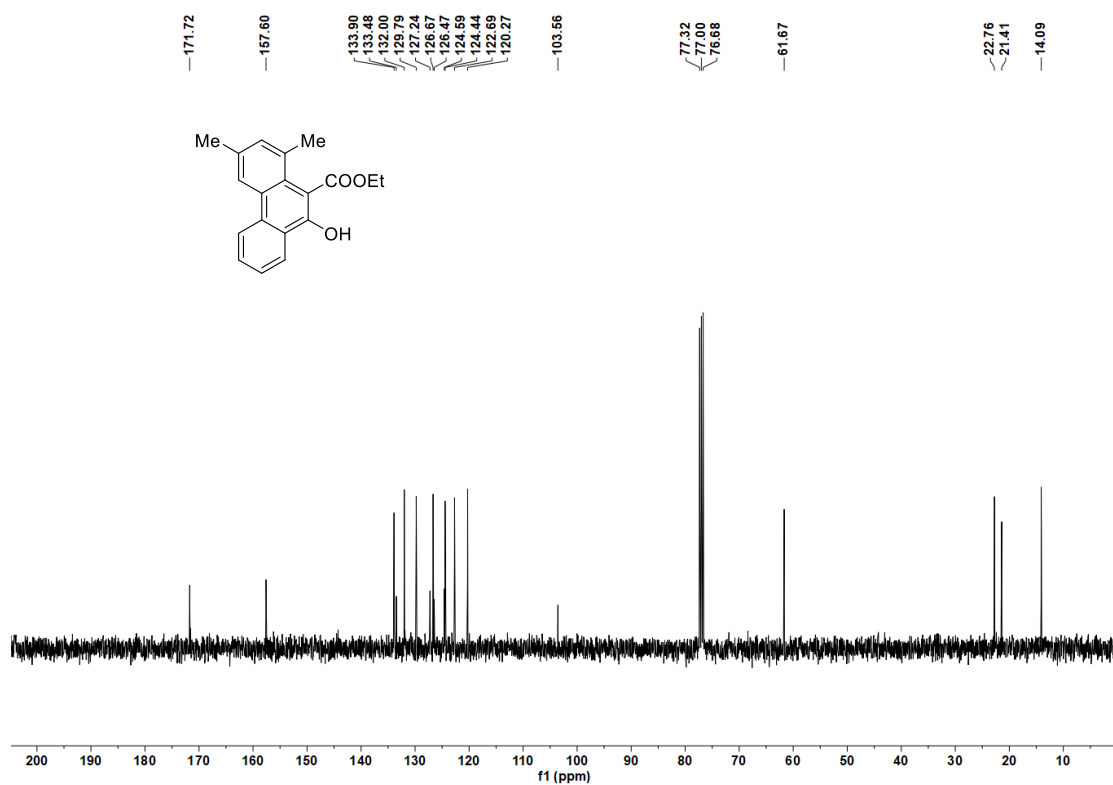

$^1\text{H-NMR}$  (400 MHz,  $\text{CDCl}_3$ ),  $^{13}\text{C NMR}$  (101 MHz,  $\text{CDCl}_3$ ) of **43a**

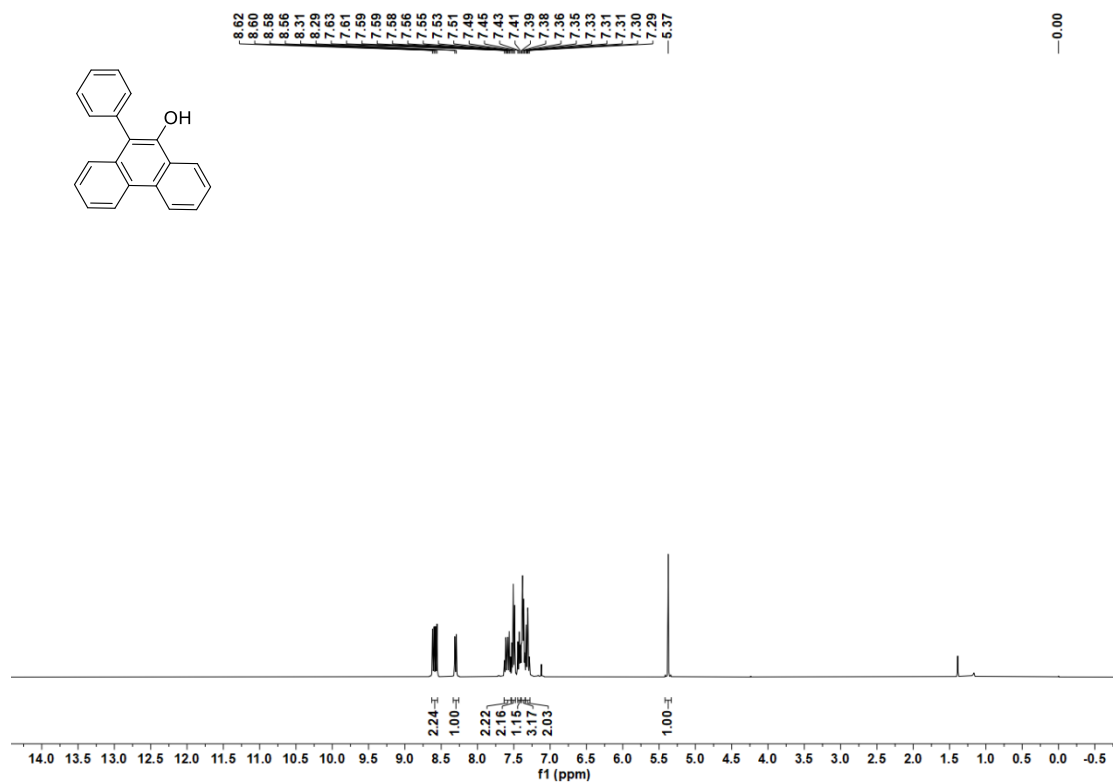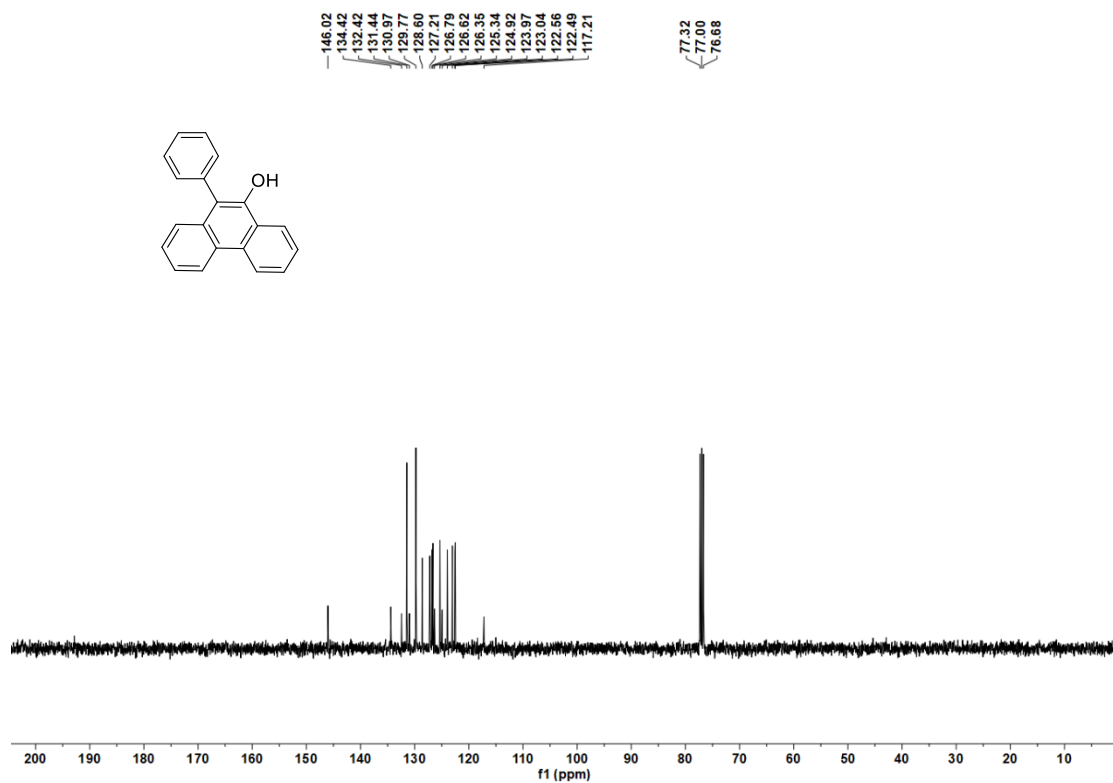

$^1\text{H-NMR}$  (400 MHz,  $\text{CDCl}_3$ ),  $^{13}\text{C NMR}$  (101 MHz,  $\text{CDCl}_3$ ) of **4a**

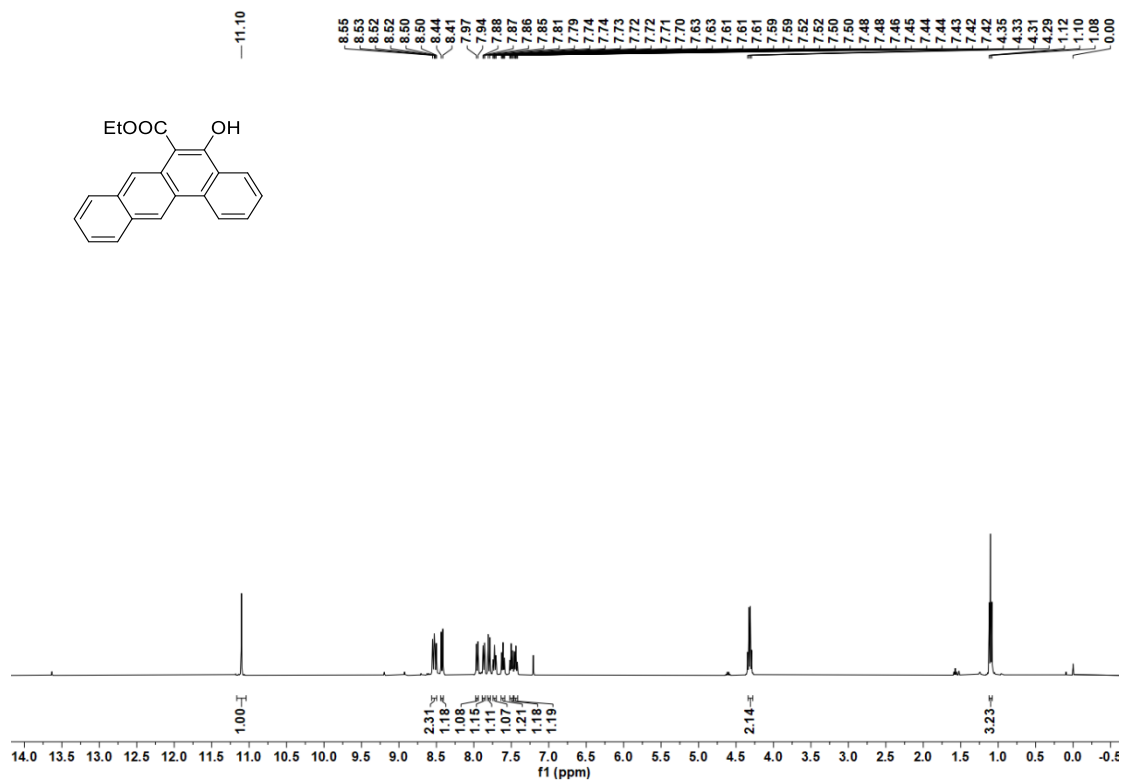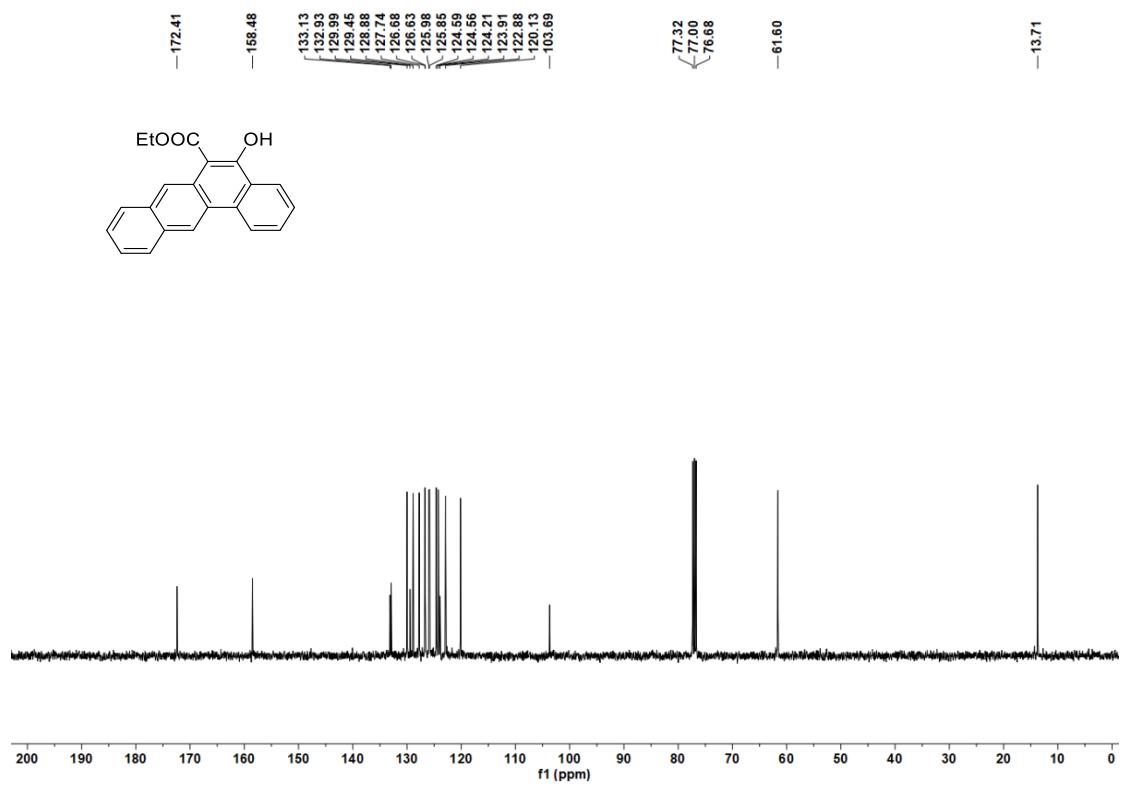

$^1\text{H-NMR}$  (400 MHz,  $\text{CDCl}_3$ ),  $^{13}\text{C-NMR}$  (101 MHz,  $\text{CDCl}_3$ ) of 45a

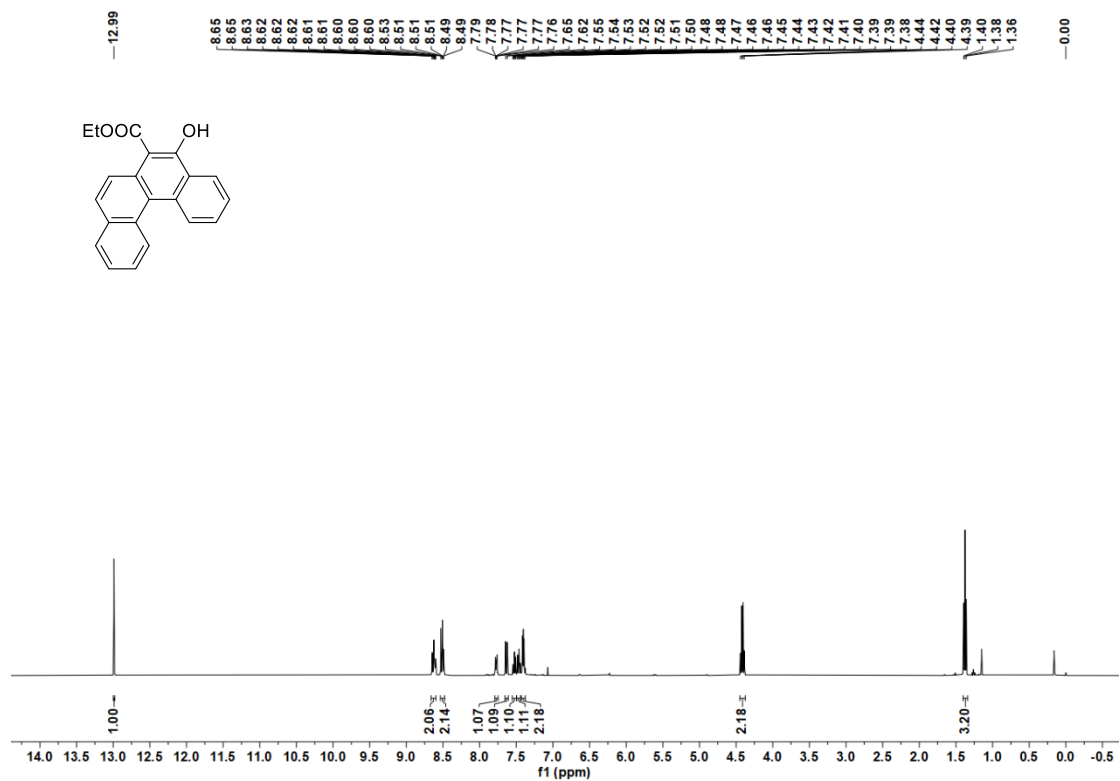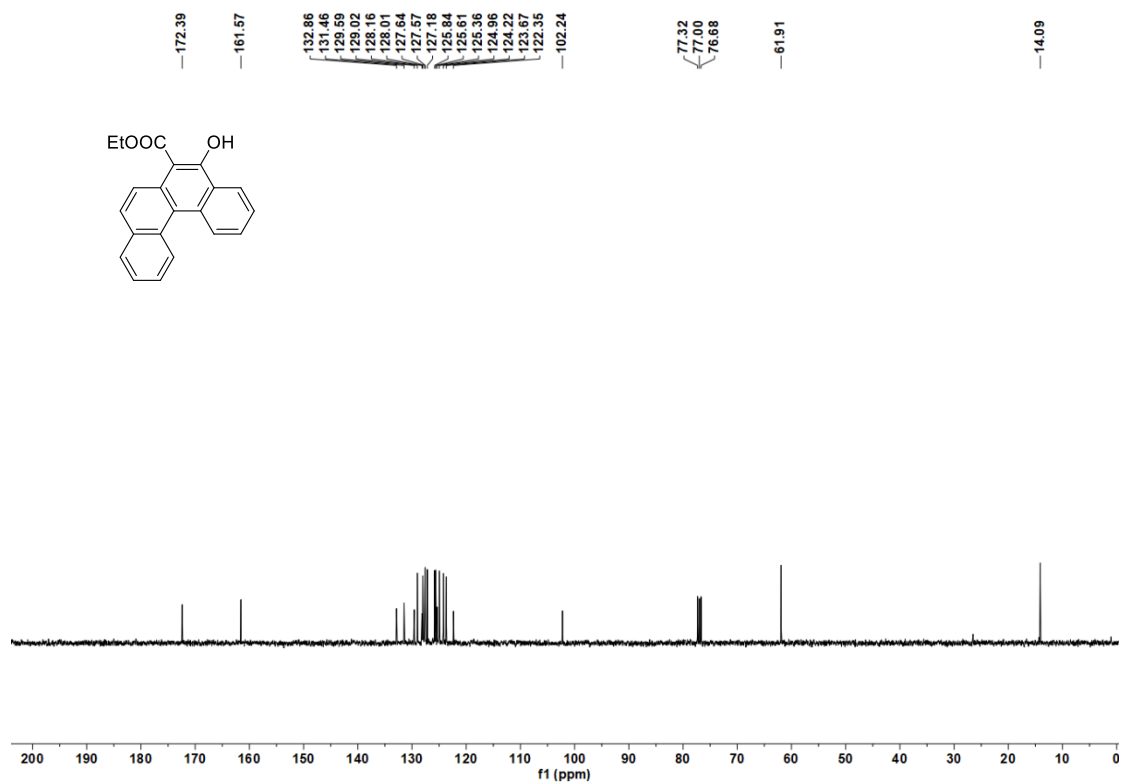

$^1\text{H-NMR}$  (400 MHz,  $\text{CDCl}_3$ ),  $^{13}\text{C NMR}$  (101 MHz,  $\text{CDCl}_3$ ) of **46a**

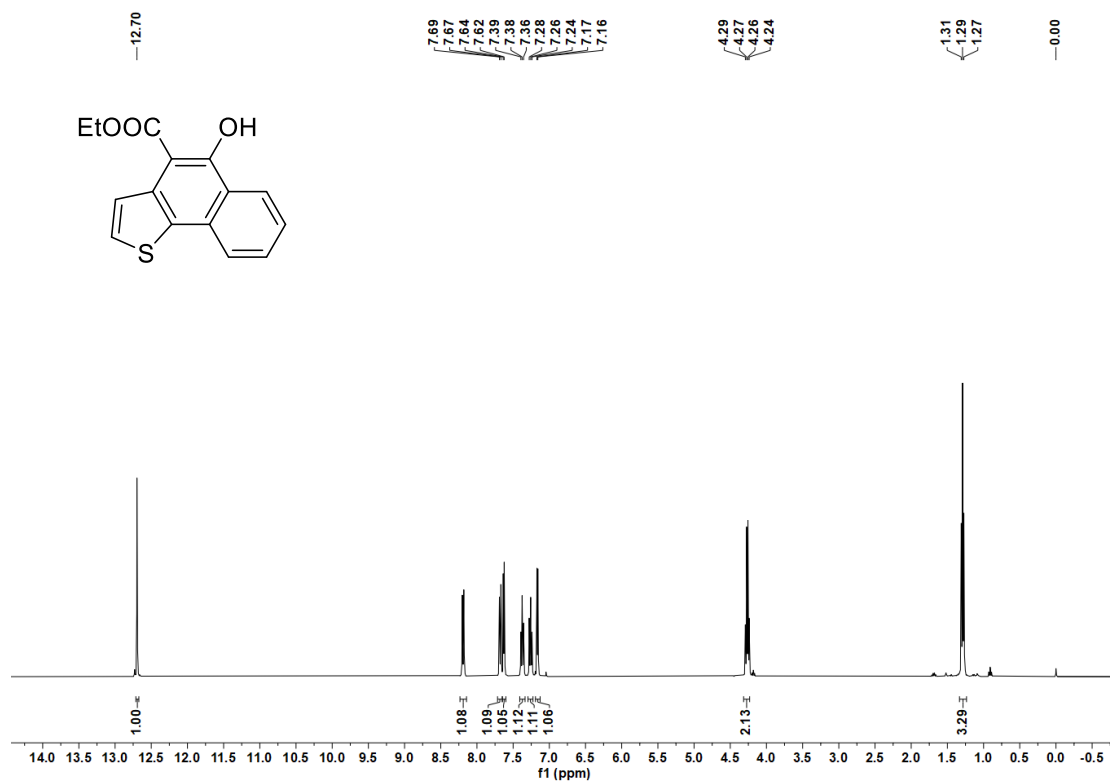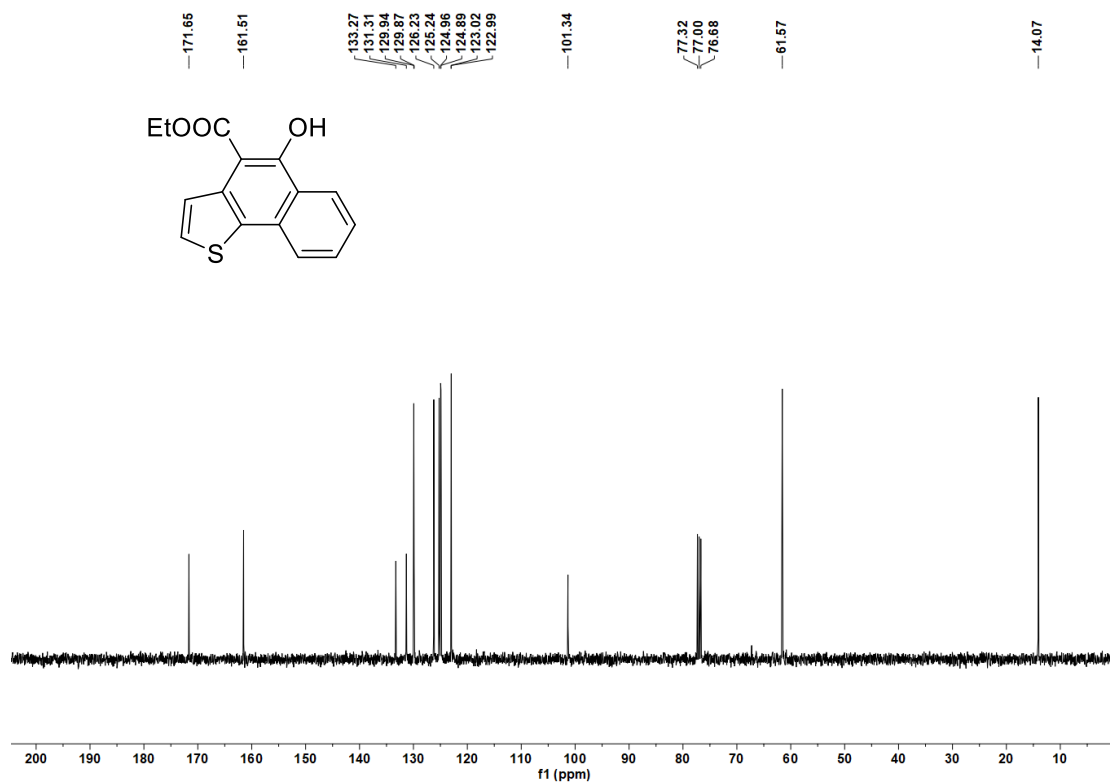

$^1\text{H-NMR}$  (400 MHz,  $\text{CDCl}_3$ ),  $^{13}\text{C-NMR}$  (101 MHz,  $\text{CDCl}_3$ ) of **47a**





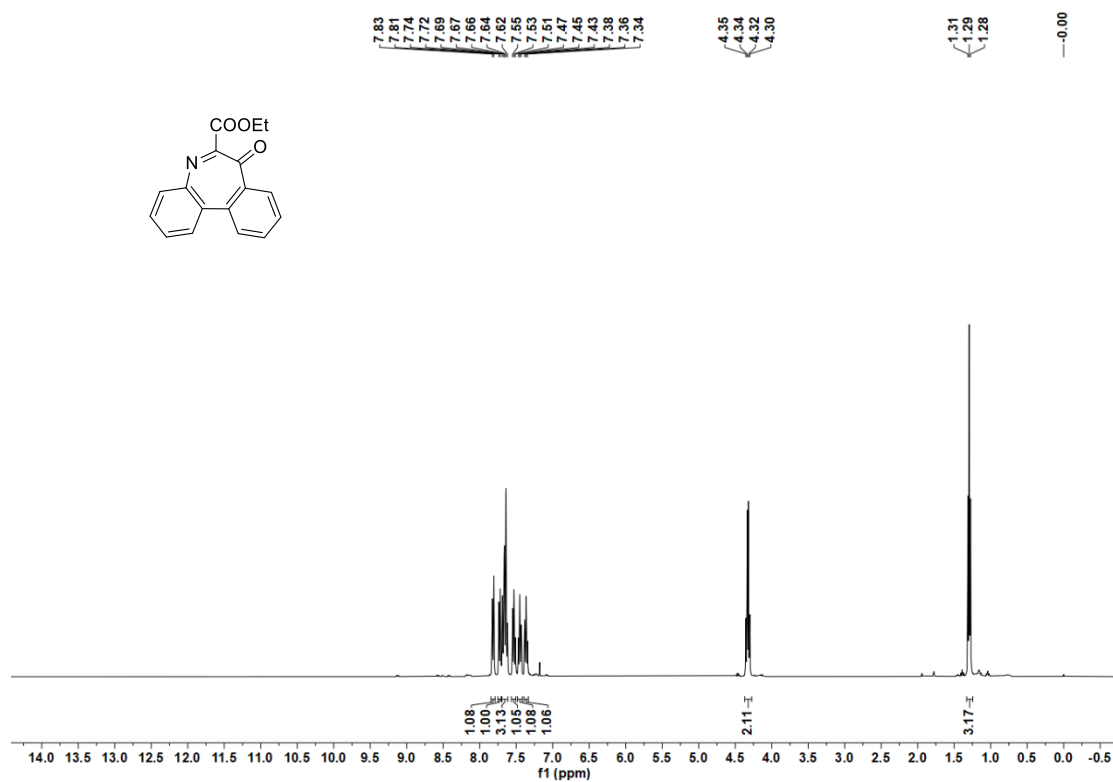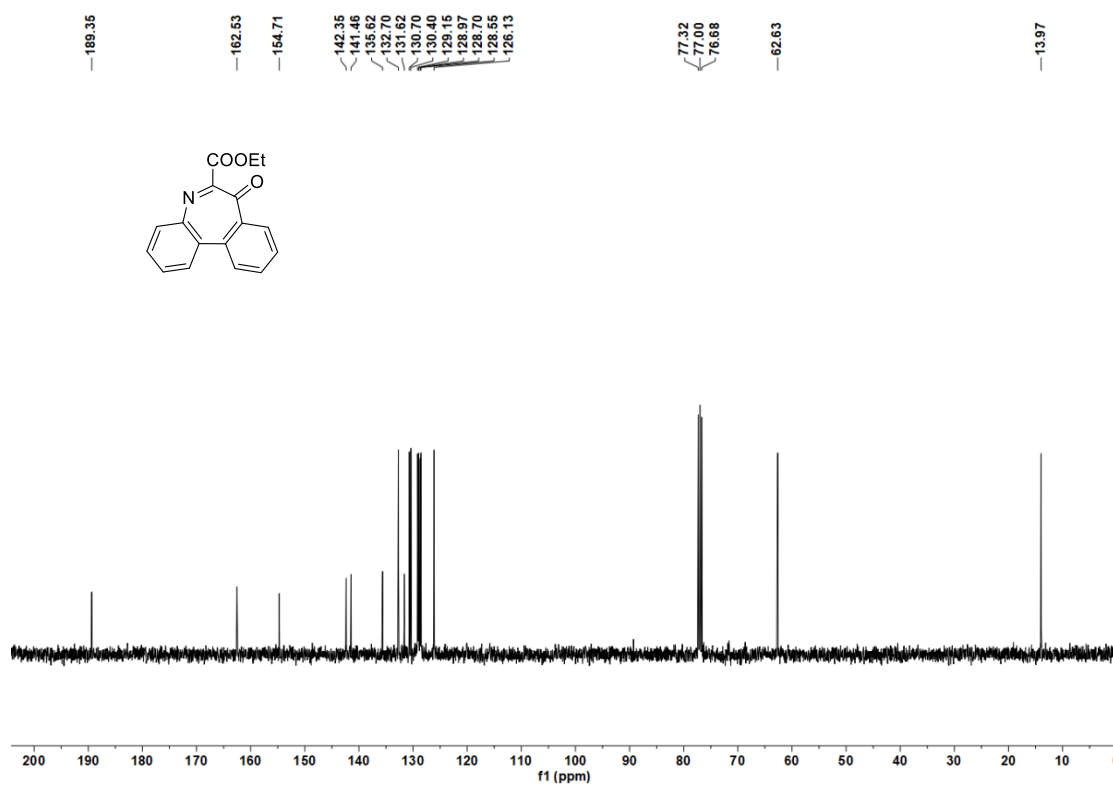

<sup>1</sup>H-NMR (400 MHz, CDCl<sub>3</sub>), <sup>13</sup>C NMR (101 MHz, CDCl<sub>3</sub>) of **1**

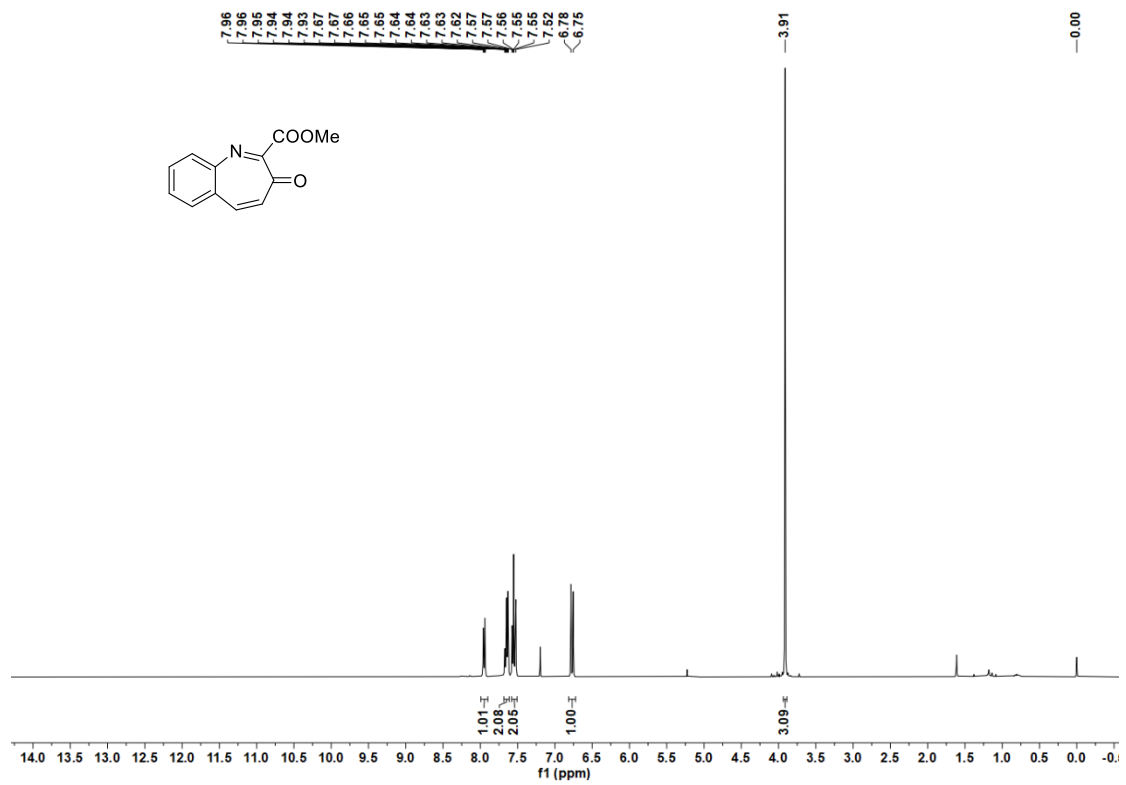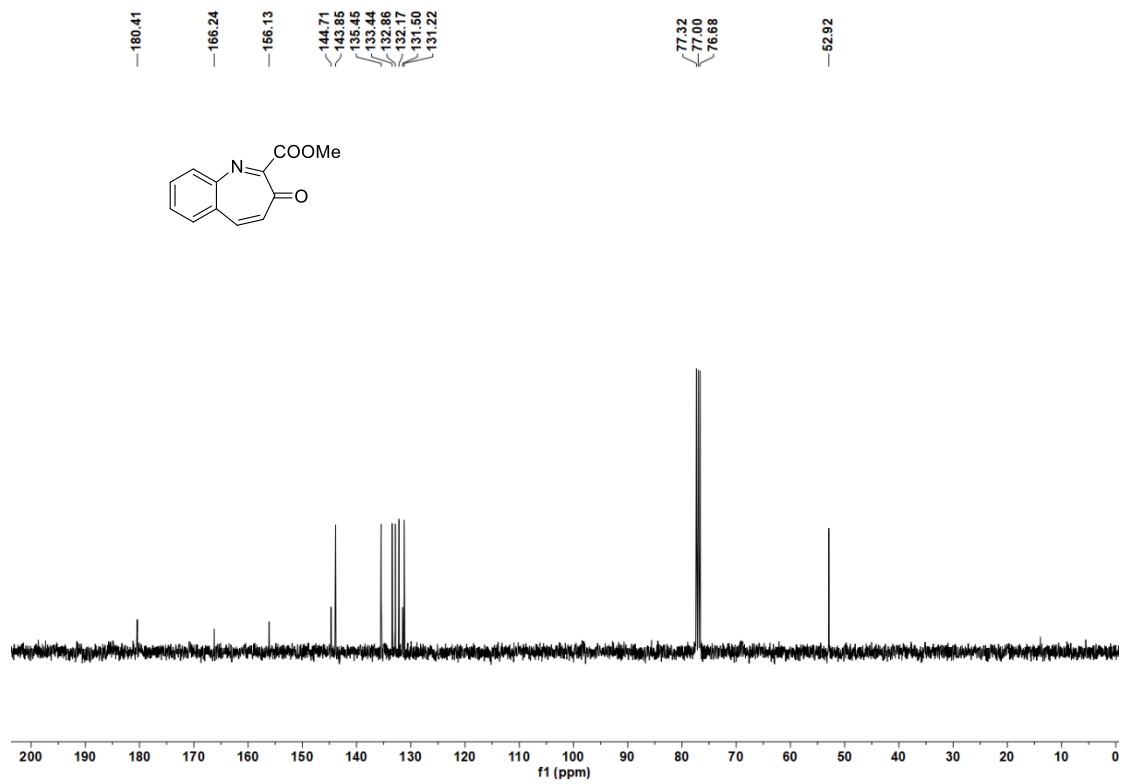

**<sup>1</sup>H-NMR** (400 MHz, CDCl<sub>3</sub>), **<sup>13</sup>C NMR** (101 MHz, CDCl<sub>3</sub>) of **2**

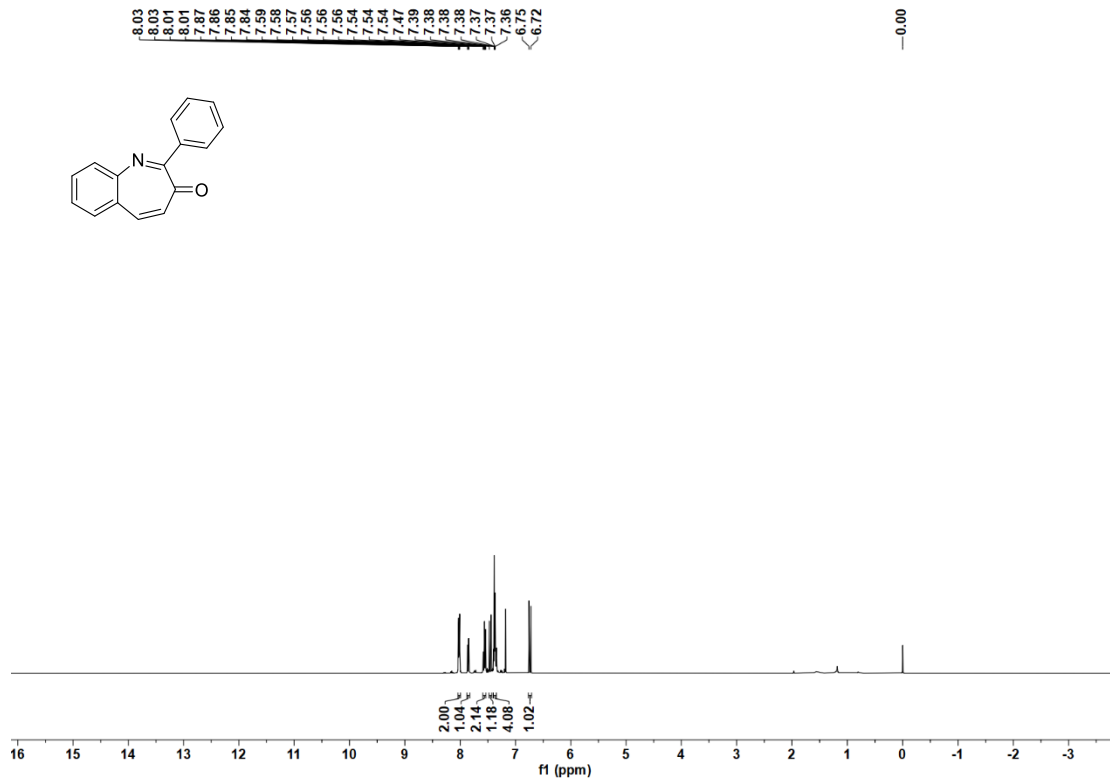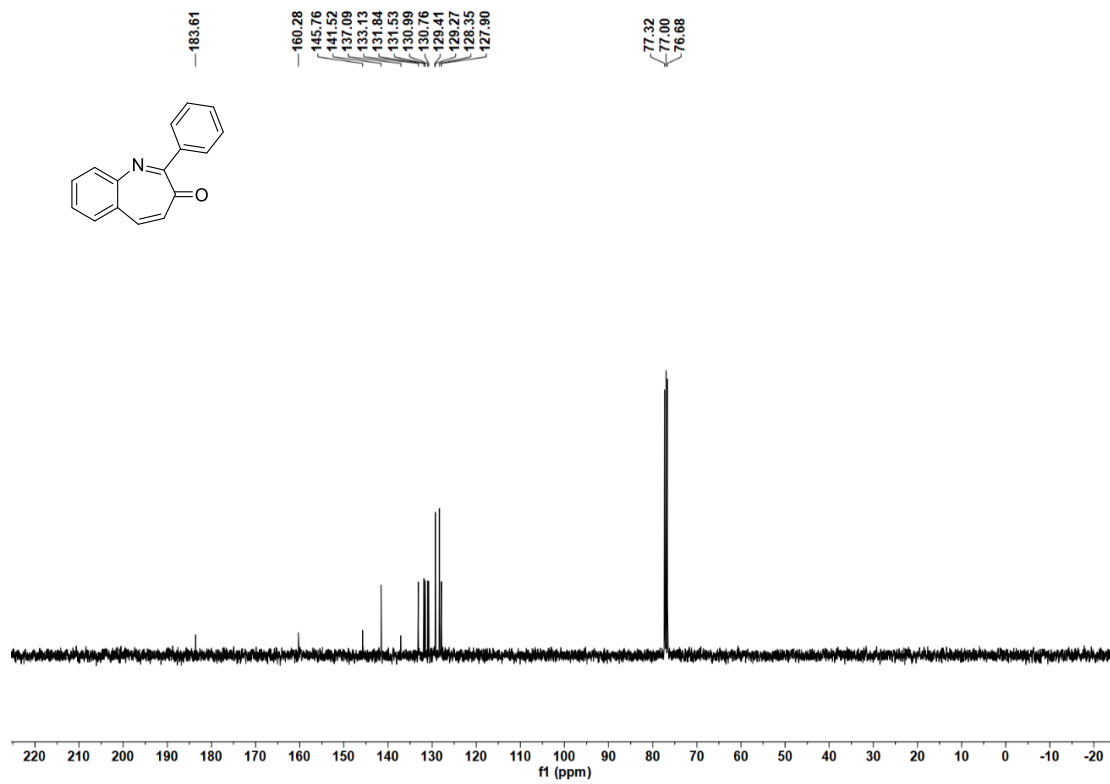

<sup>1</sup>H-NMR (400 MHz, CDCl<sub>3</sub>), <sup>13</sup>C NMR (101 MHz, CDCl<sub>3</sub>) of **3**

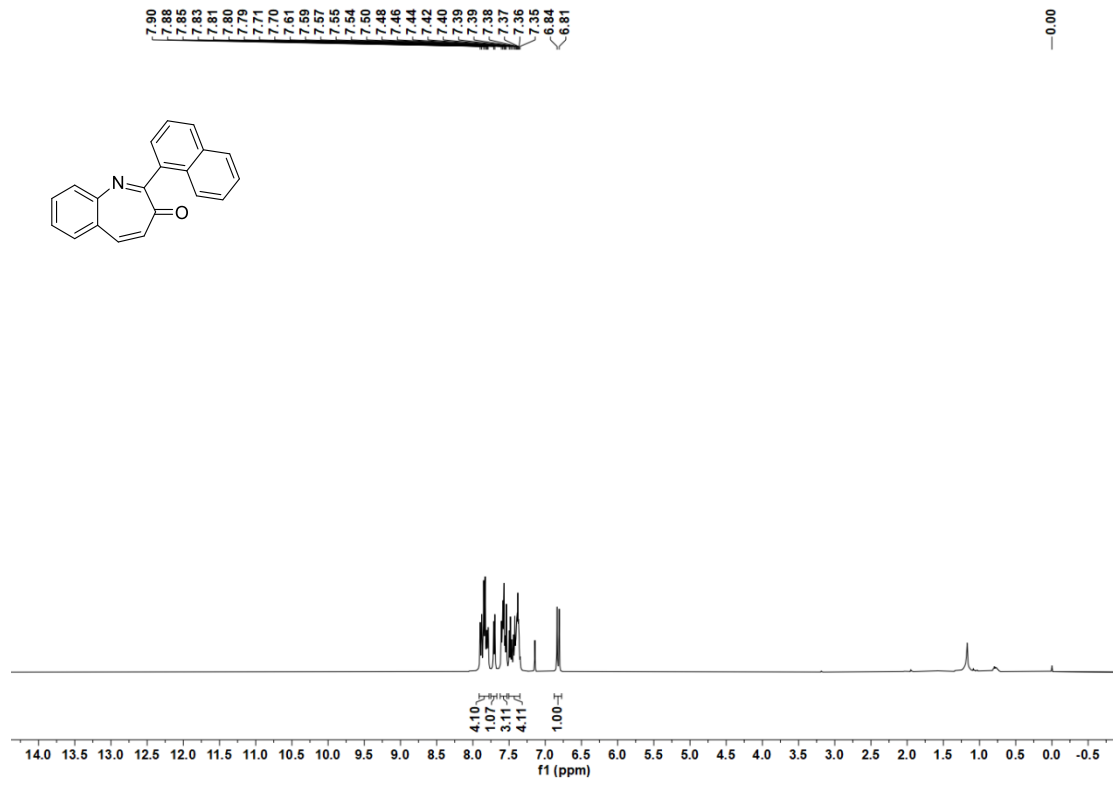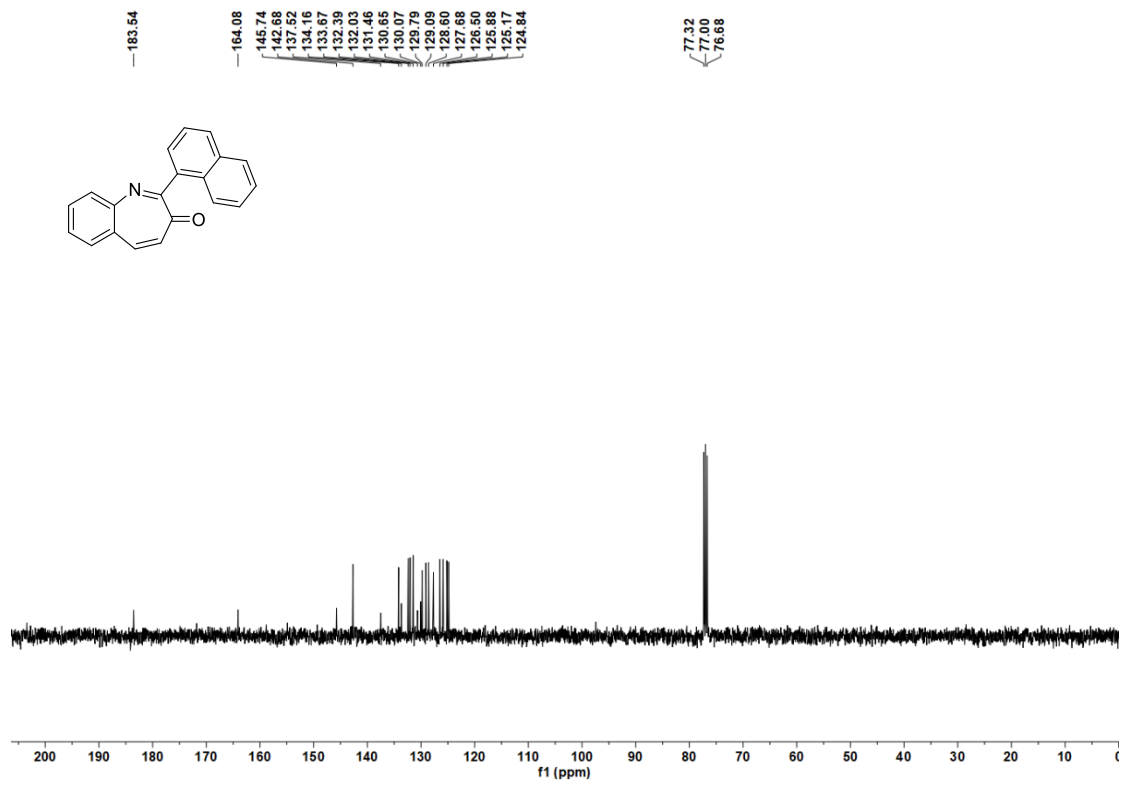

<sup>1</sup>H-NMR (400 MHz, CDCl<sub>3</sub>), <sup>13</sup>C NMR (101 MHz, CDCl<sub>3</sub>) of **4**

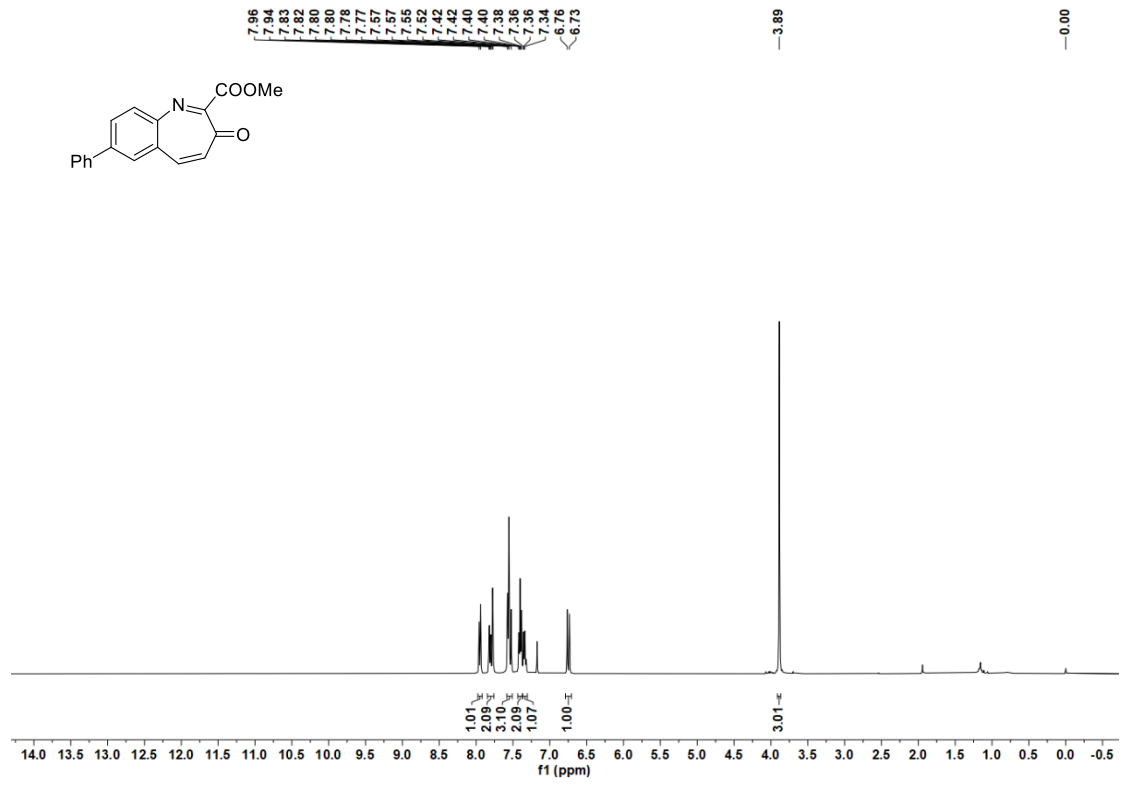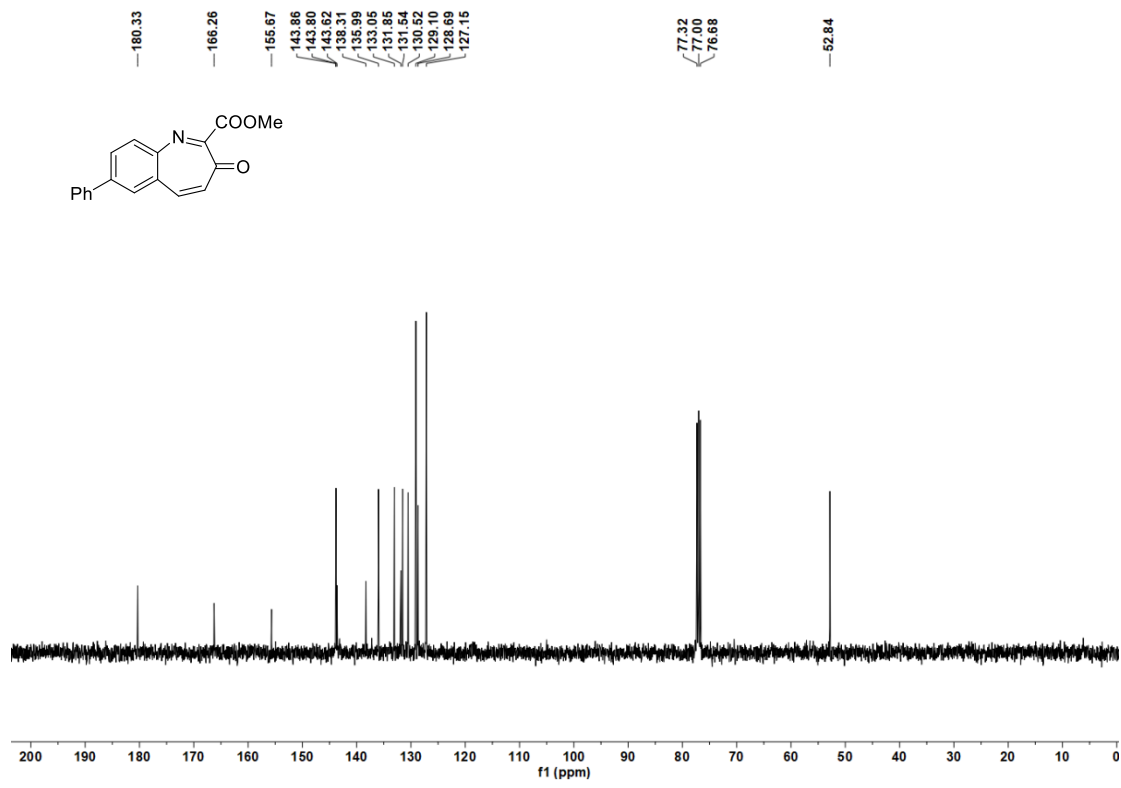

<sup>1</sup>H-NMR (400 MHz, CDCl<sub>3</sub>), <sup>13</sup>C NMR (101 MHz, CDCl<sub>3</sub>) of **5**

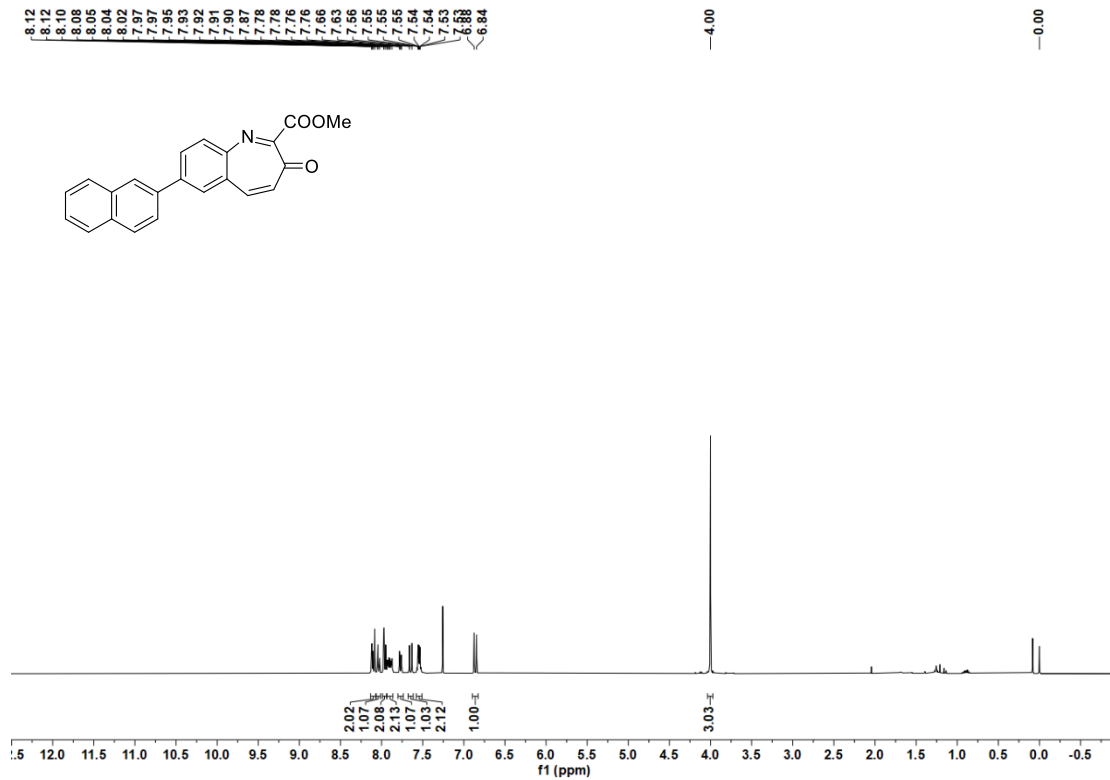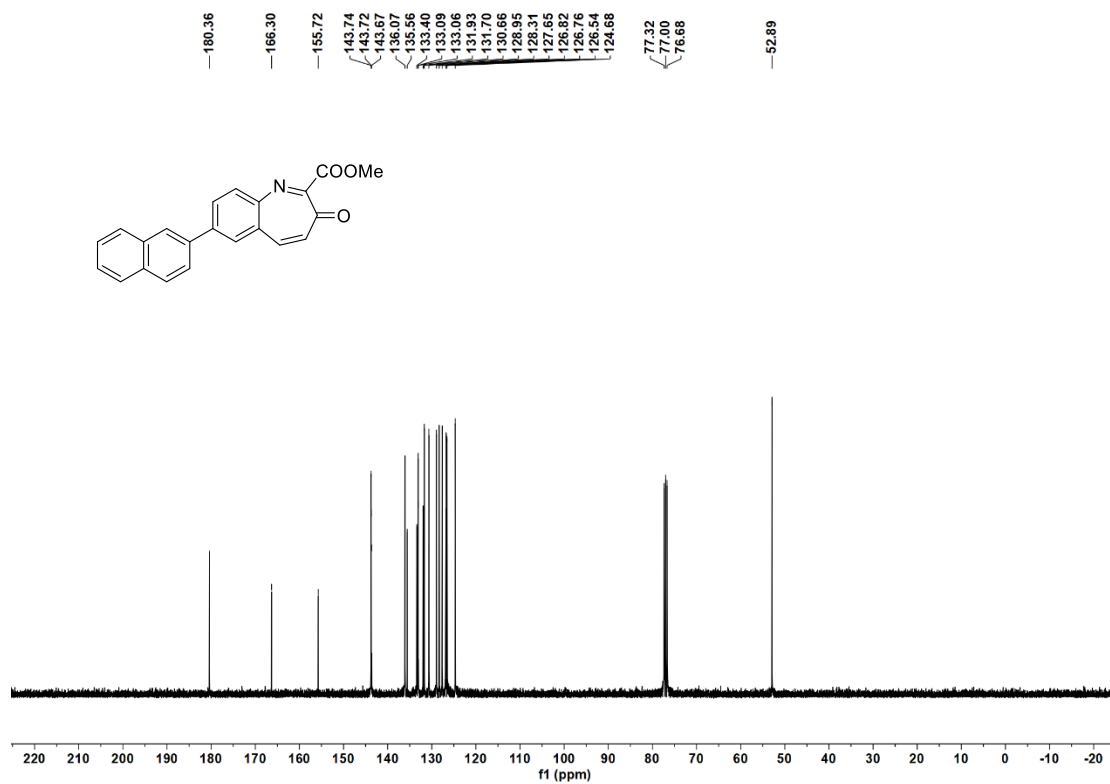

<sup>1</sup>H-NMR (400 MHz, CDCl<sub>3</sub>), <sup>13</sup>C NMR (101 MHz, CDCl<sub>3</sub>) of **6**

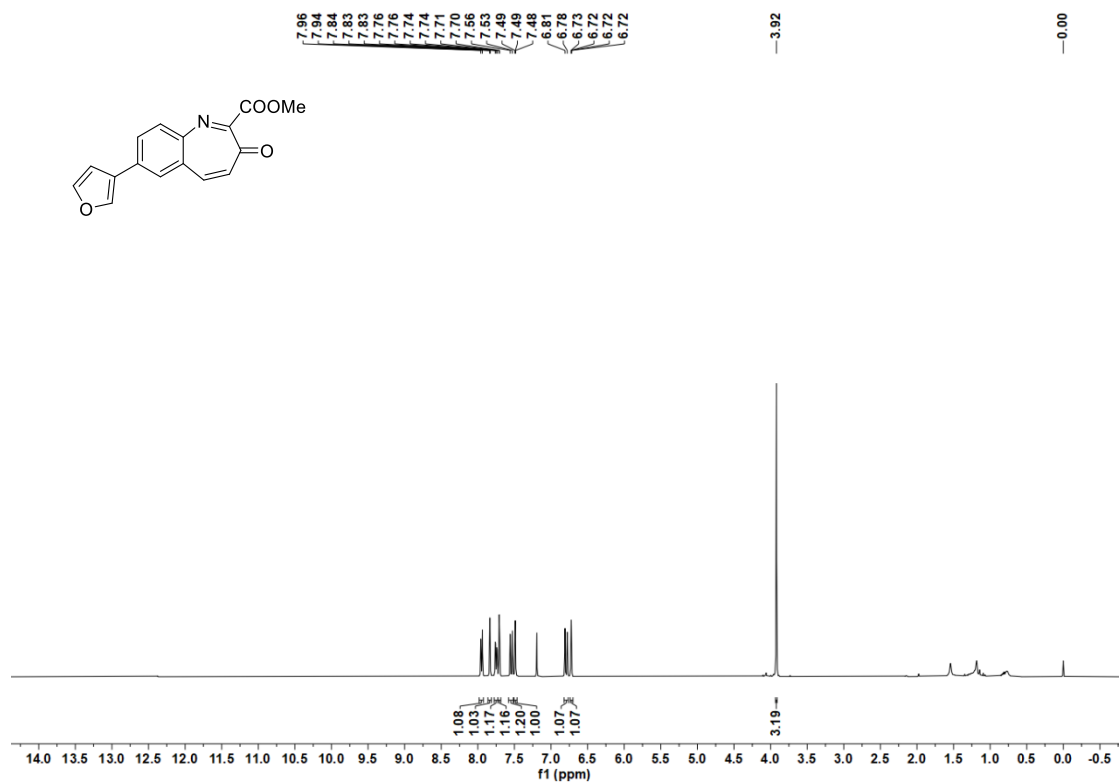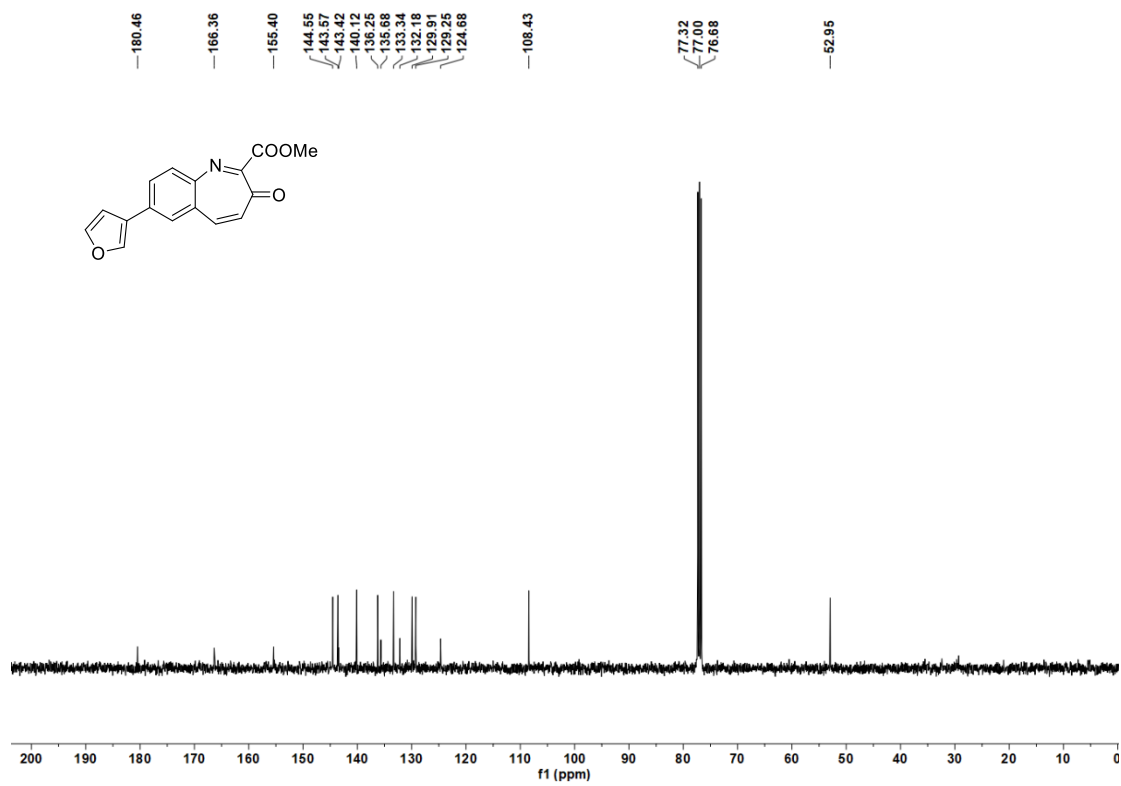

$^1\text{H-NMR}$  (400 MHz,  $\text{CDCl}_3$ ),  $^{13}\text{C-NMR}$  (101 MHz,  $\text{CDCl}_3$ ) of **7**



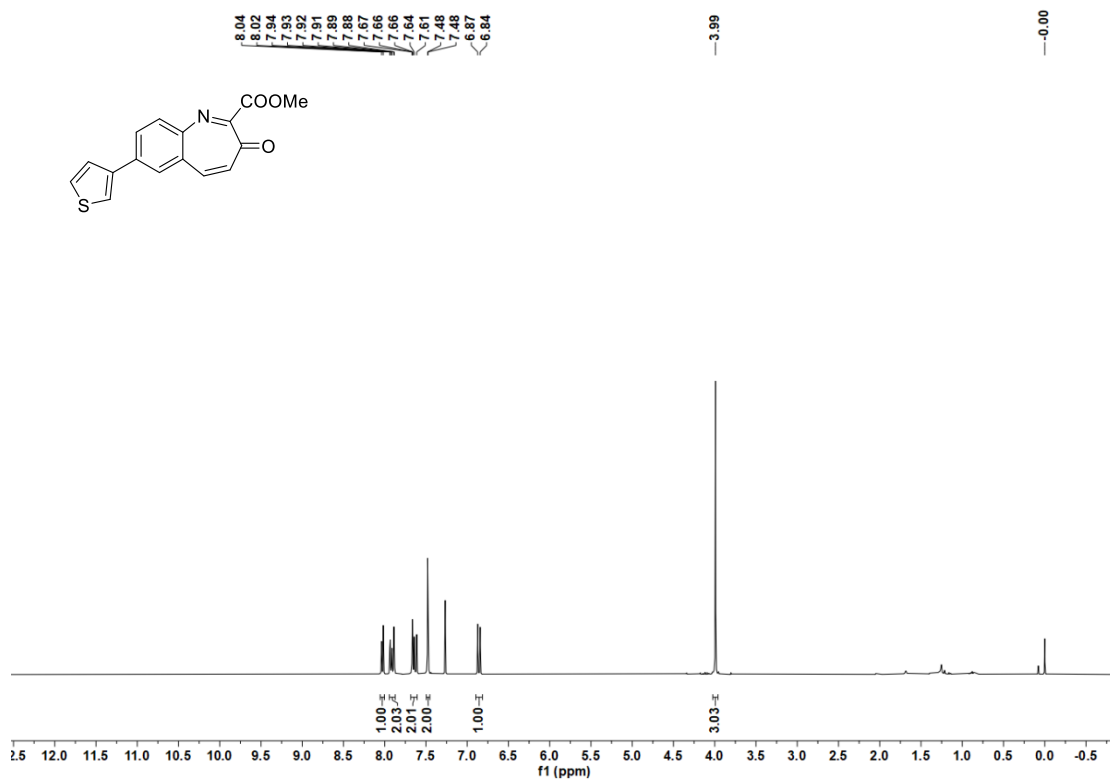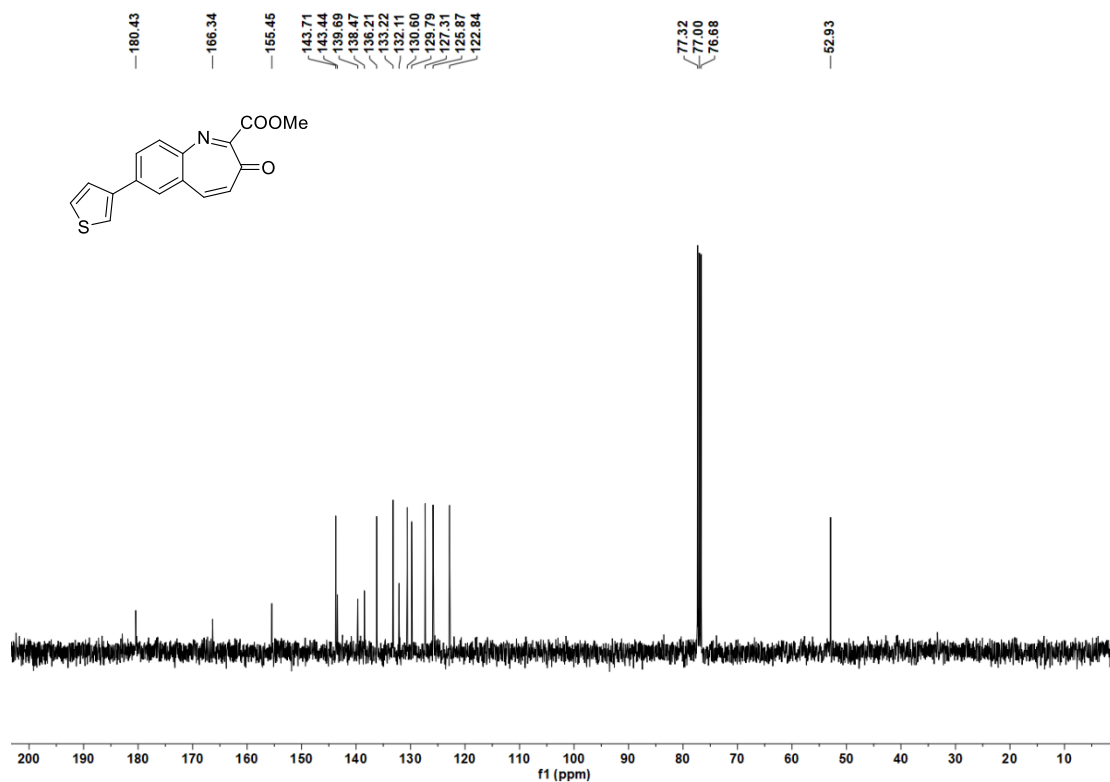

$^1\text{H-NMR}$  (400 MHz,  $\text{CDCl}_3$ ),  $^{13}\text{C-NMR}$  (101 MHz,  $\text{CDCl}_3$ ) of **8**

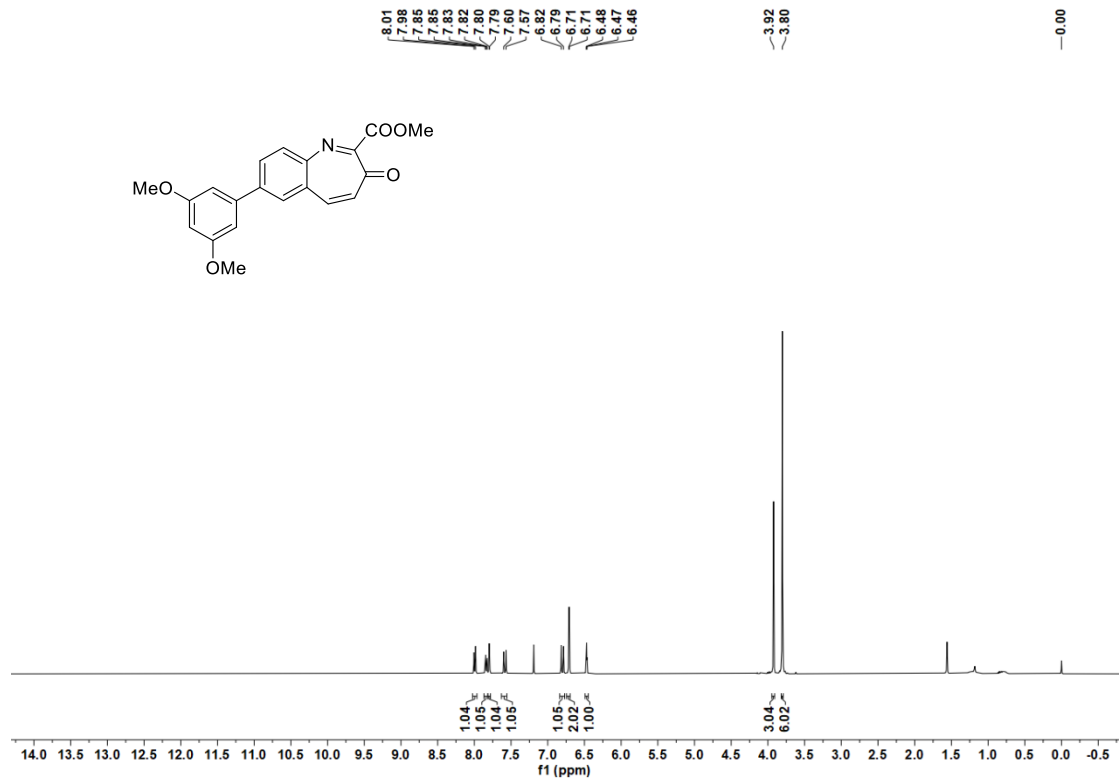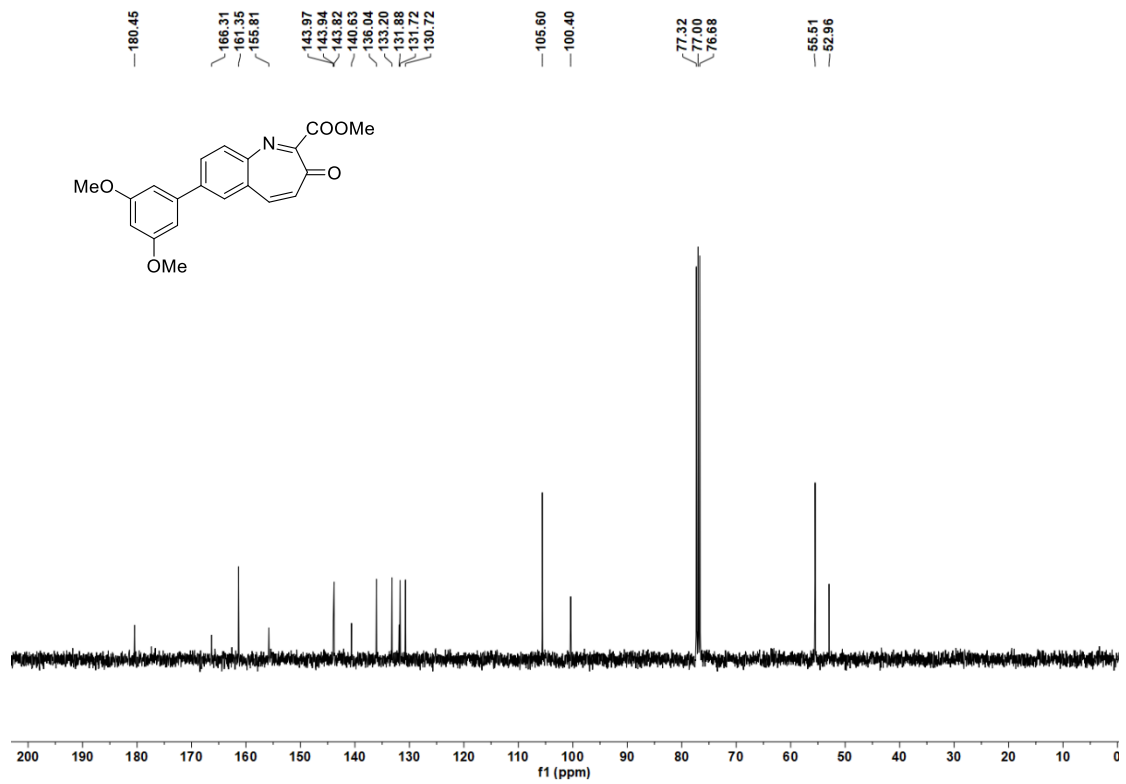

<sup>1</sup>H-NMR (400 MHz, CDCl<sub>3</sub>), <sup>13</sup>C NMR (101 MHz, CDCl<sub>3</sub>) of **9**

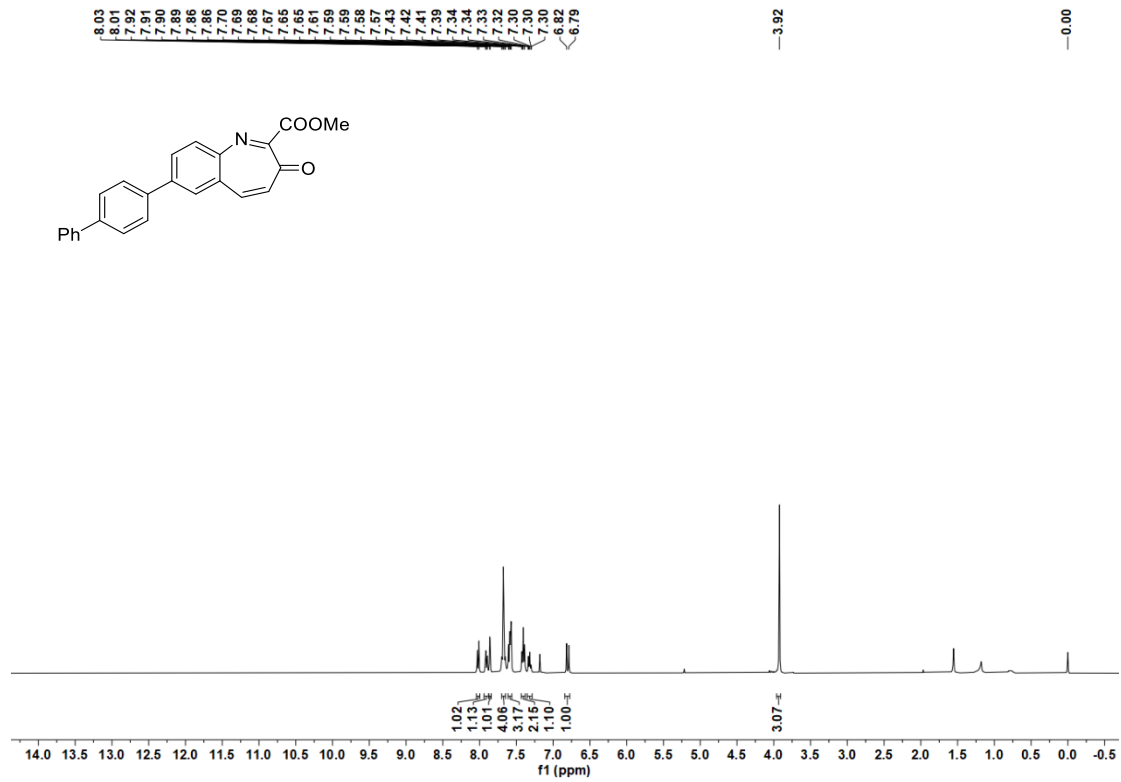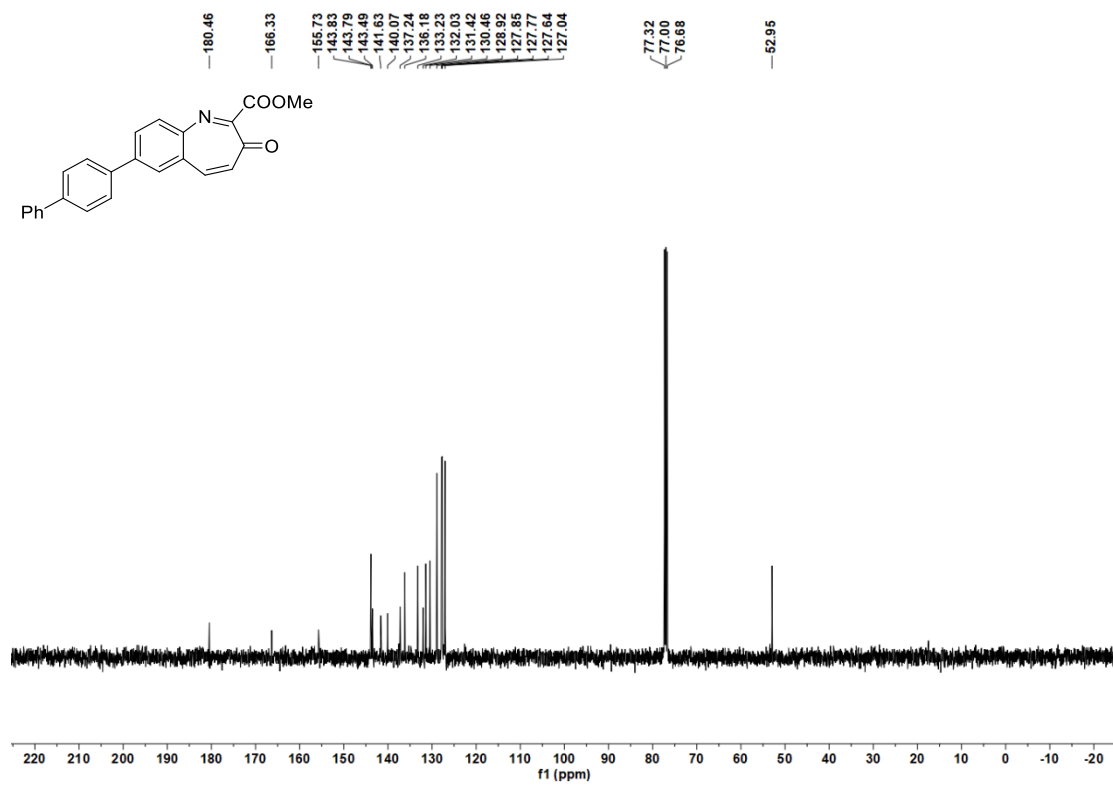

$^1\text{H-NMR}$  (400 MHz,  $\text{CDCl}_3$ ),  $^{13}\text{C-NMR}$  (101 MHz,  $\text{CDCl}_3$ ) of **10**

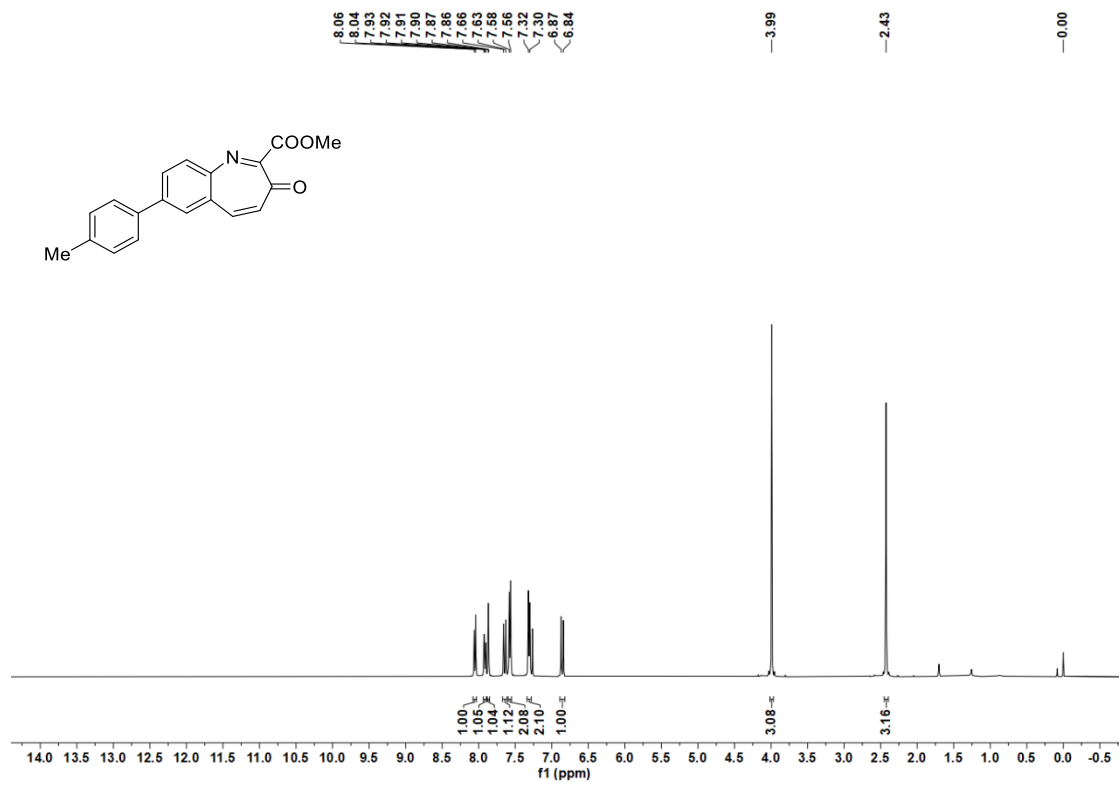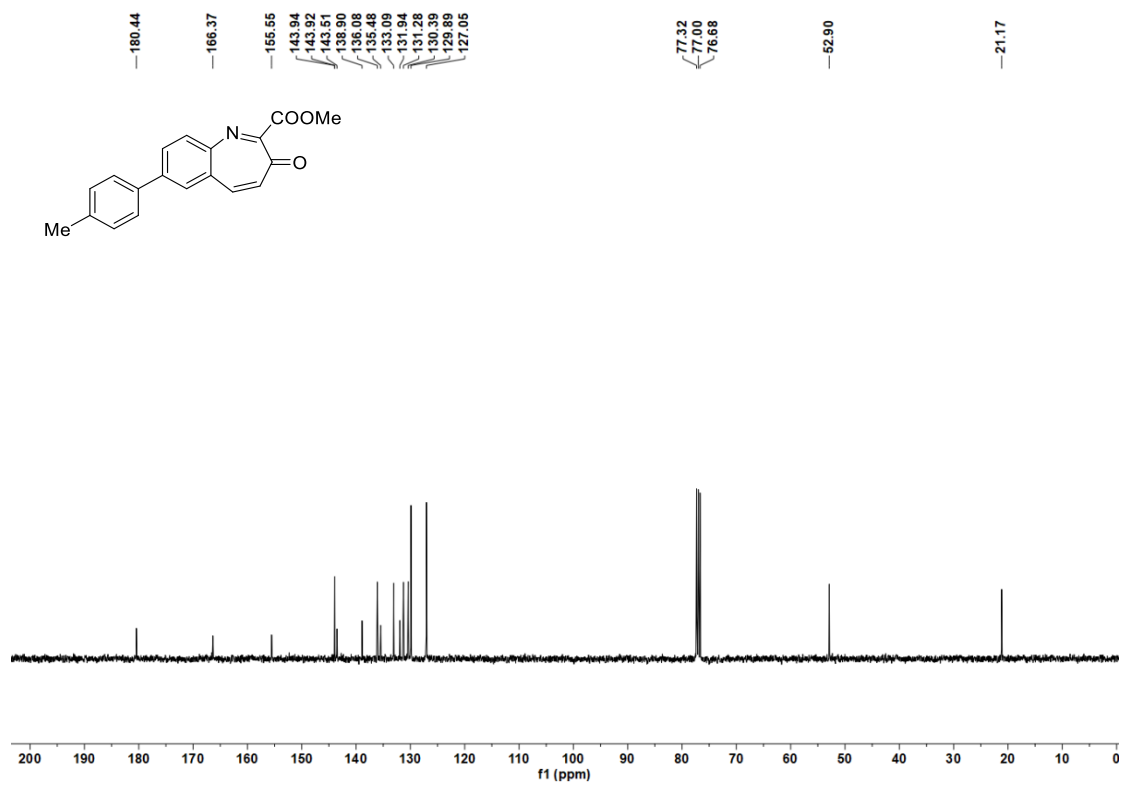

<sup>1</sup>H-NMR (400 MHz, CDCl<sub>3</sub>), <sup>13</sup>C NMR (101 MHz, CDCl<sub>3</sub>) of **11**

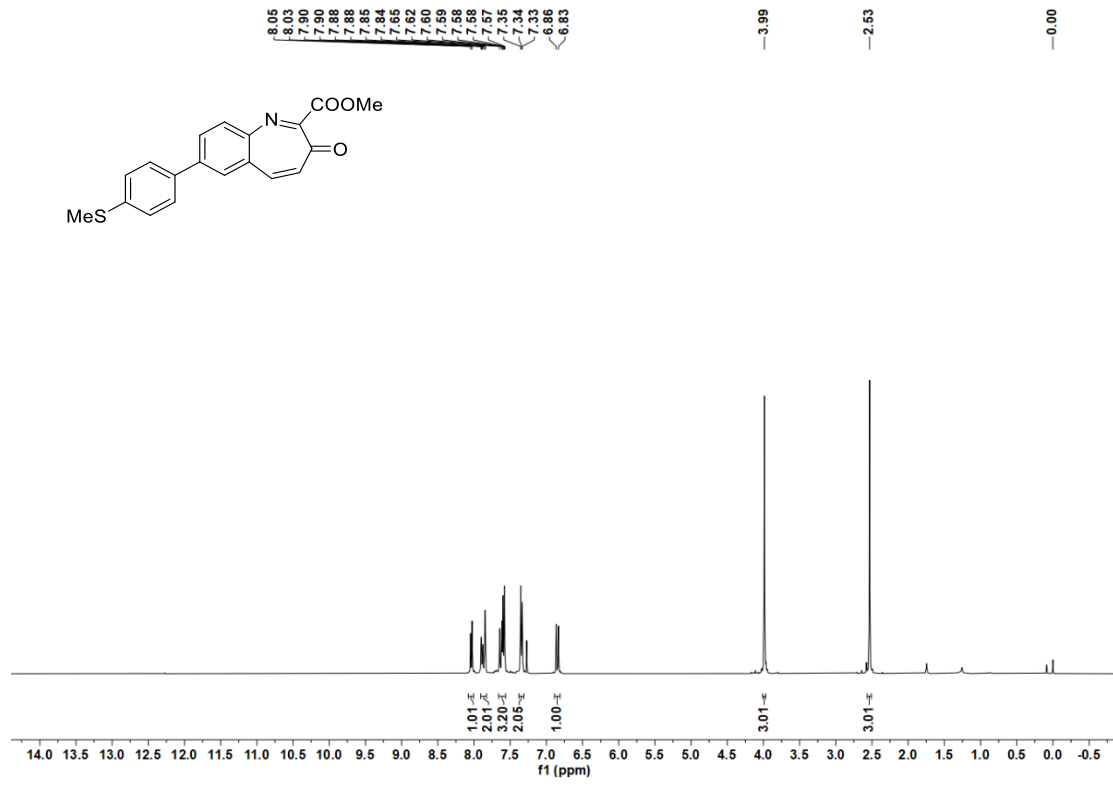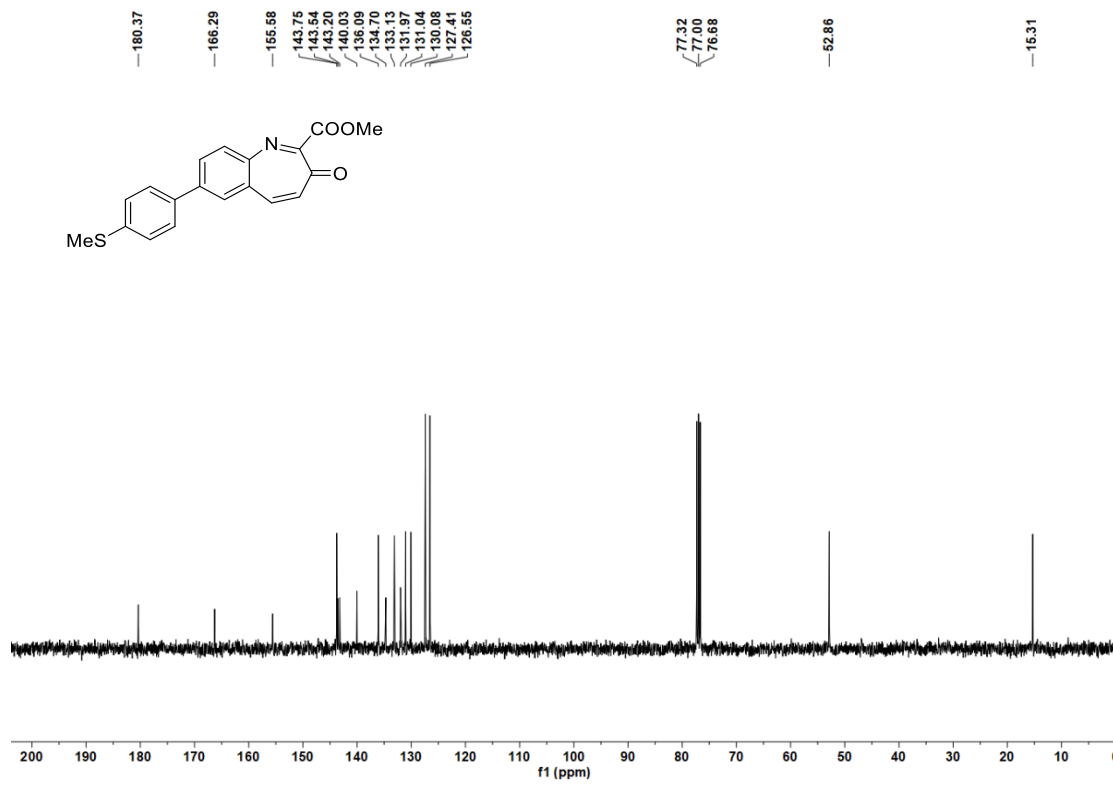

<sup>1</sup>H-NMR (400 MHz, CDCl<sub>3</sub>), <sup>13</sup>C NMR (101 MHz, CDCl<sub>3</sub>) of **12**

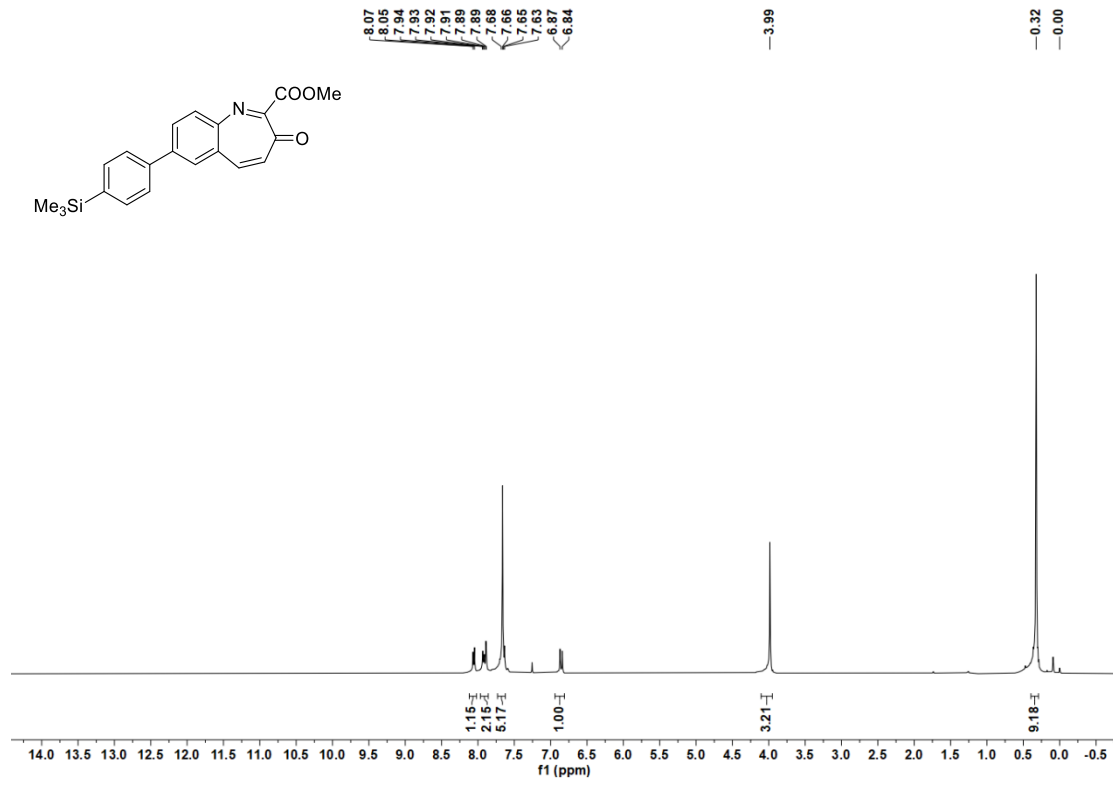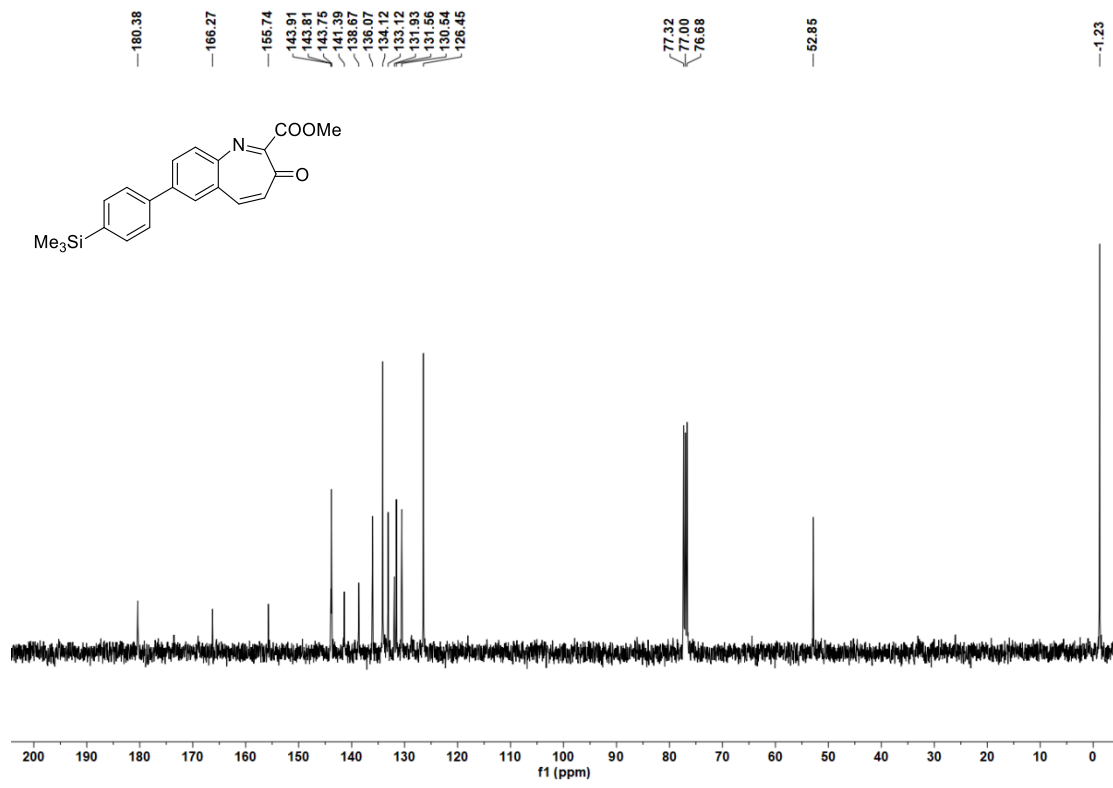

<sup>1</sup>H-NMR (400 MHz, CDCl<sub>3</sub>), <sup>13</sup>C NMR (101 MHz, CDCl<sub>3</sub>) of **13**

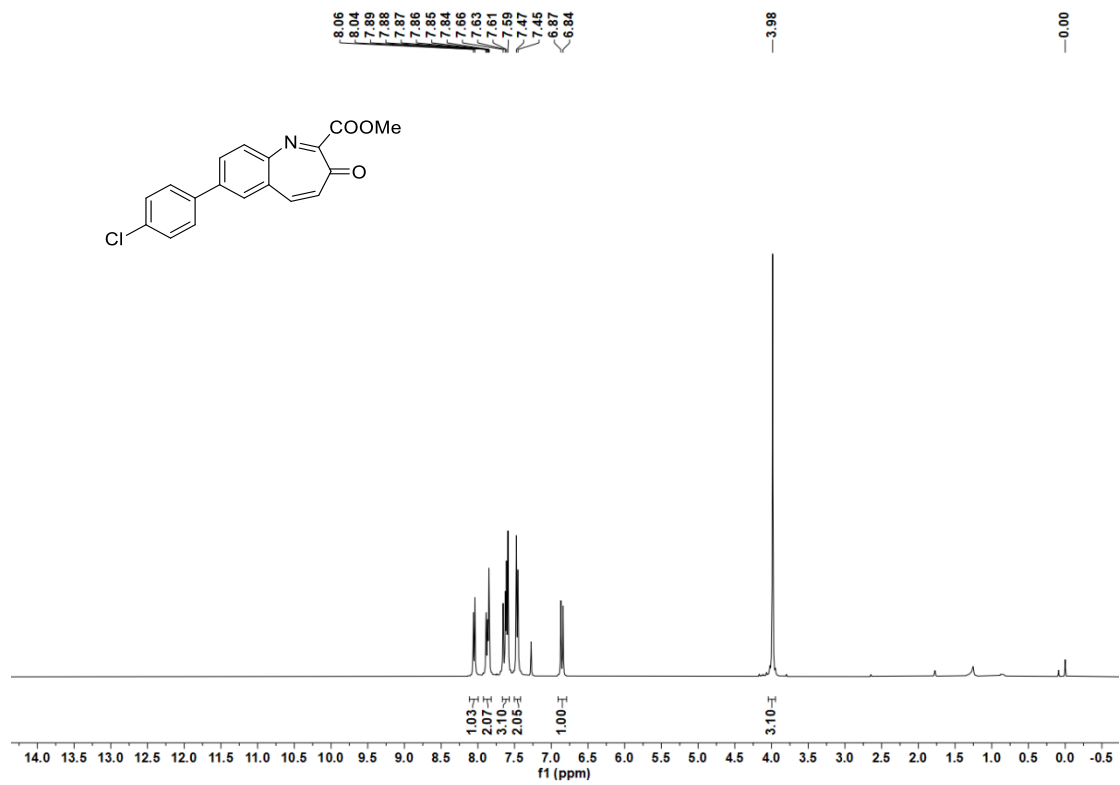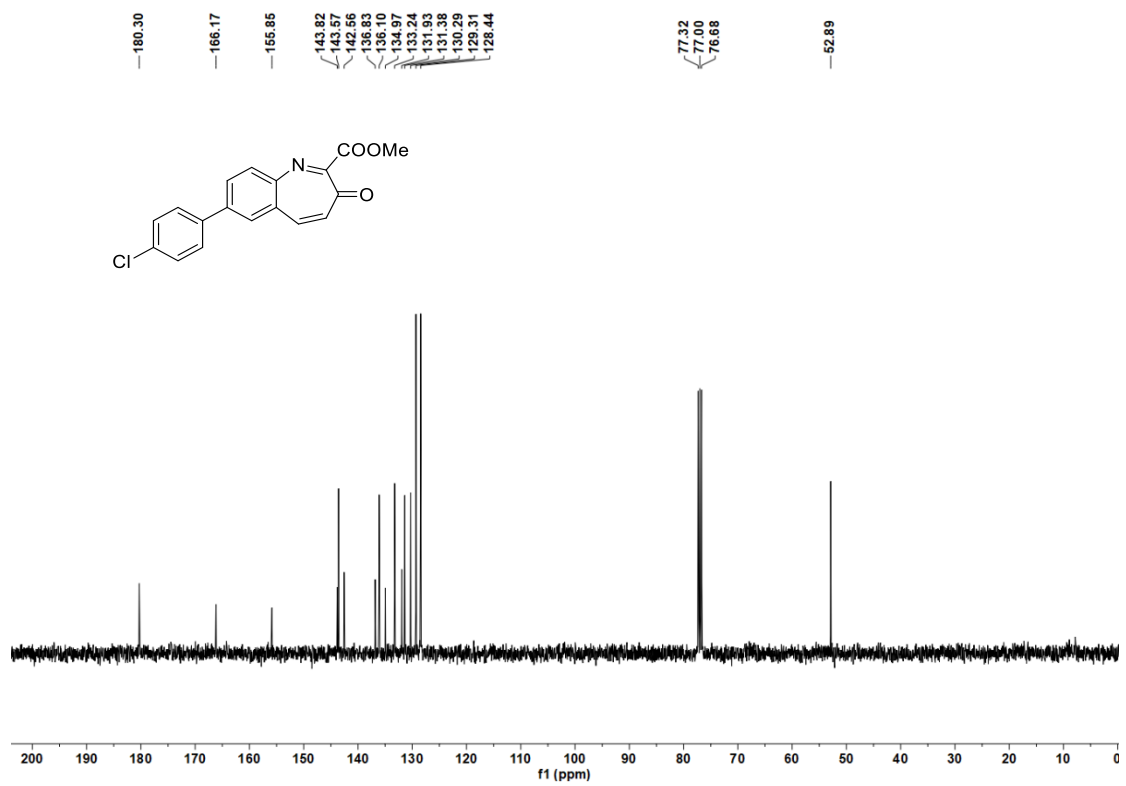

$^1\text{H-NMR}$  (400 MHz,  $\text{CDCl}_3$ ),  $^{13}\text{C-NMR}$  (101 MHz,  $\text{CDCl}_3$ ) of **14**

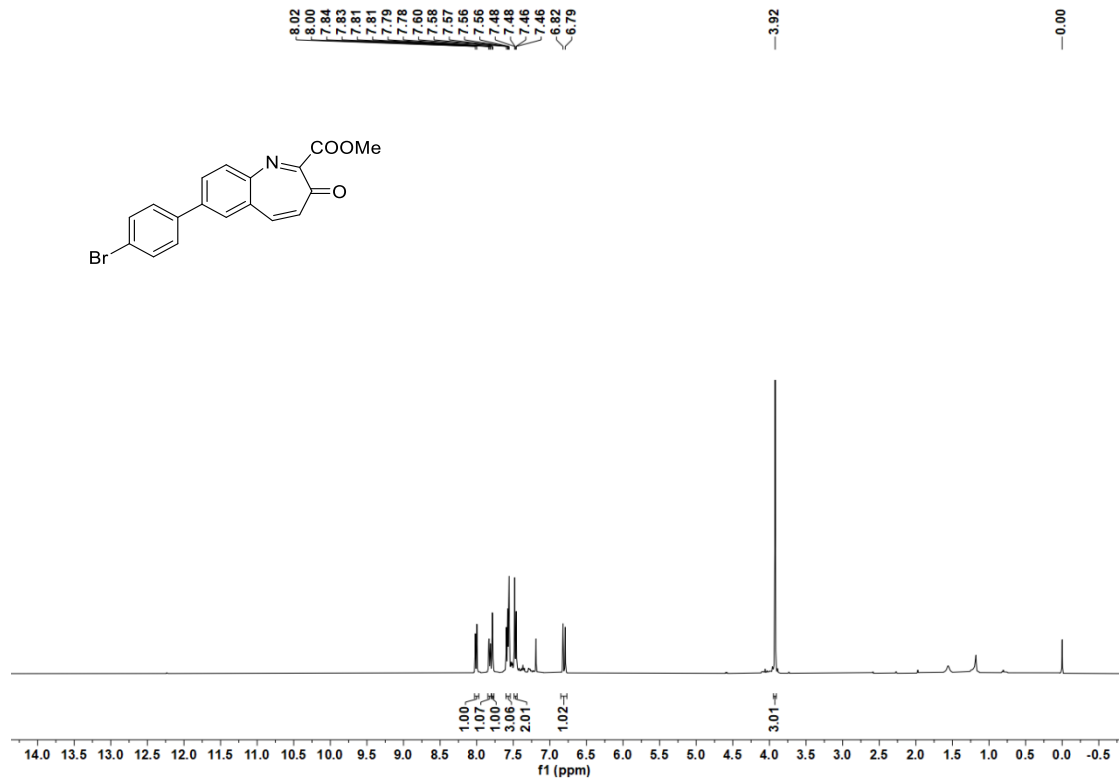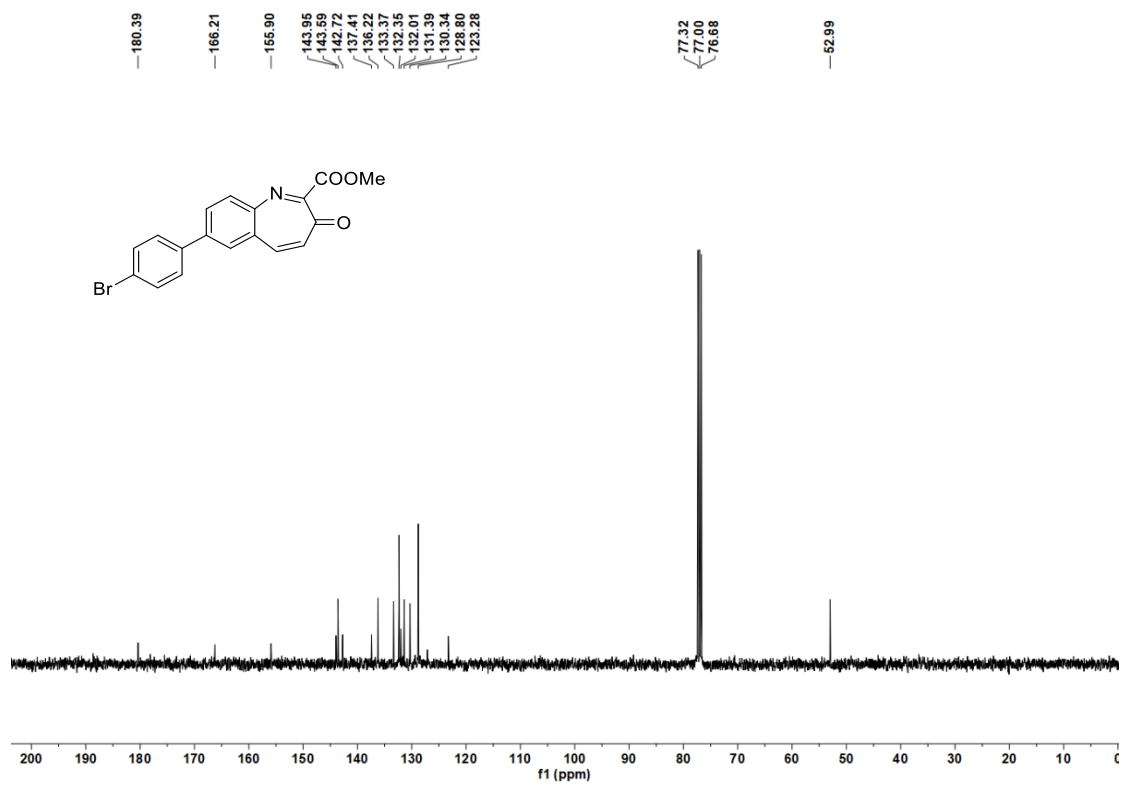

$^1\text{H-NMR}$  (400 MHz,  $\text{CDCl}_3$ ),  $^{13}\text{C-NMR}$  (101 MHz,  $\text{CDCl}_3$ ) of **15**



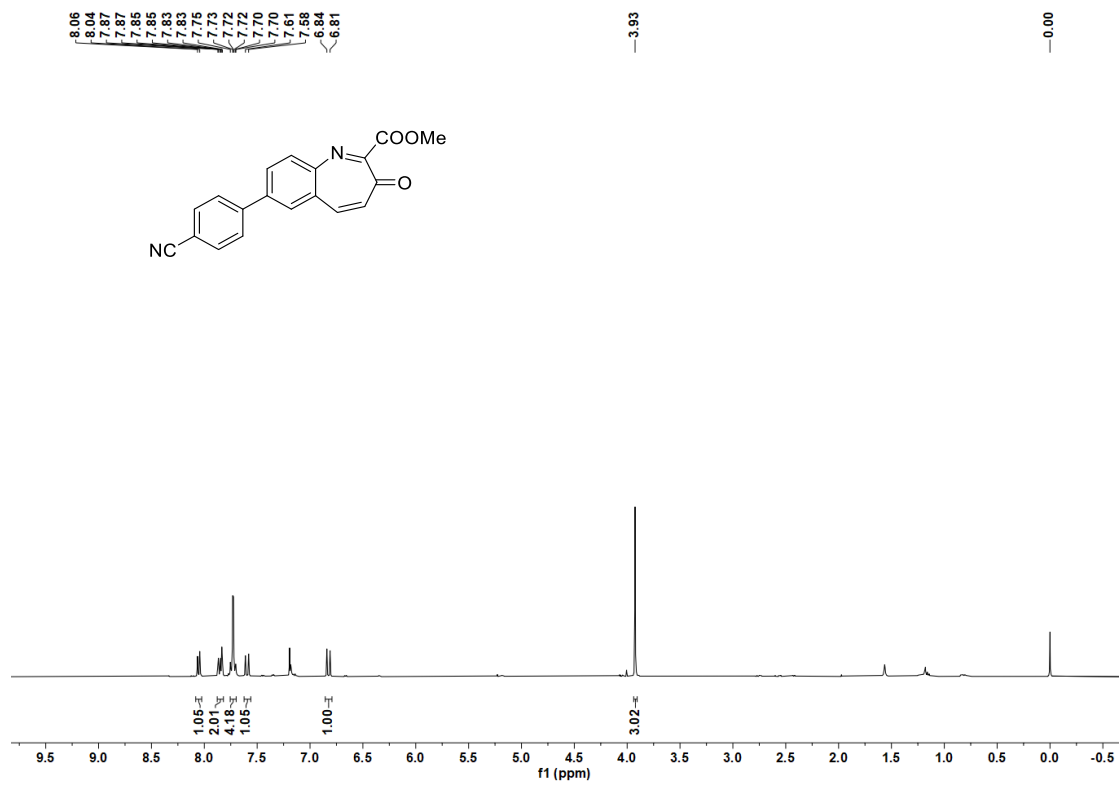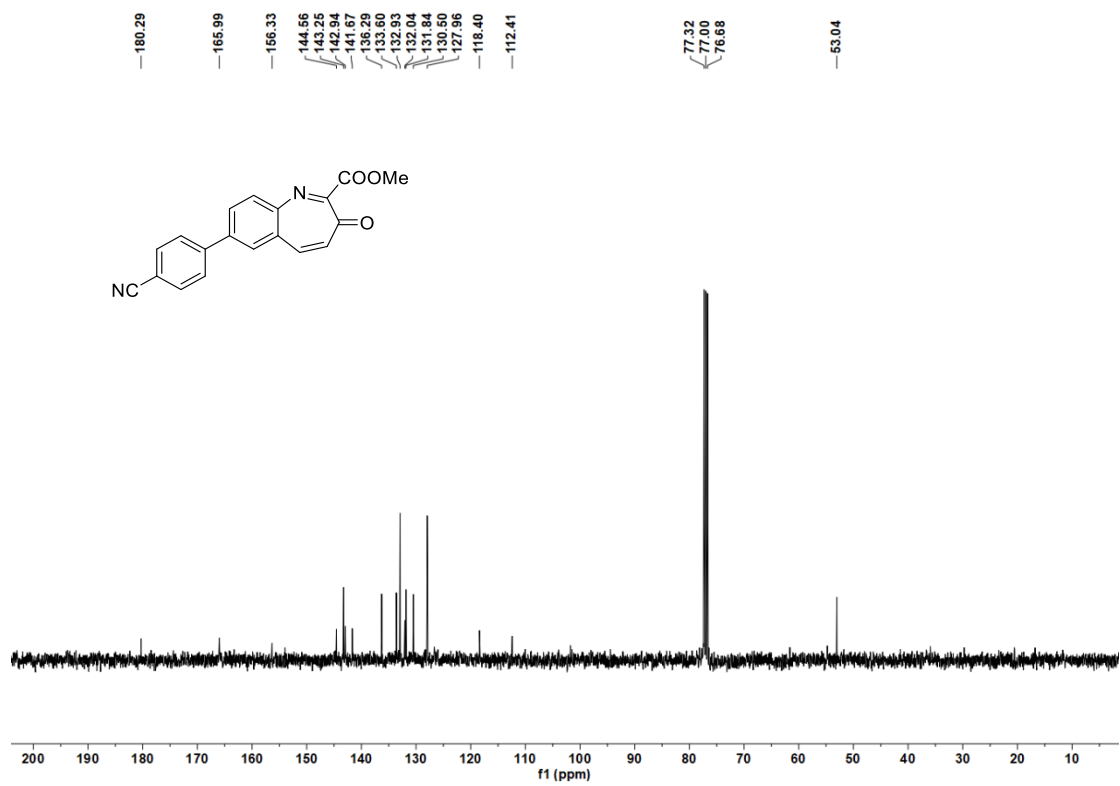

$^1\text{H-NMR}$  (400 MHz,  $\text{CDCl}_3$ ),  $^{13}\text{C-NMR}$  (101 MHz,  $\text{CDCl}_3$ ) of **16**

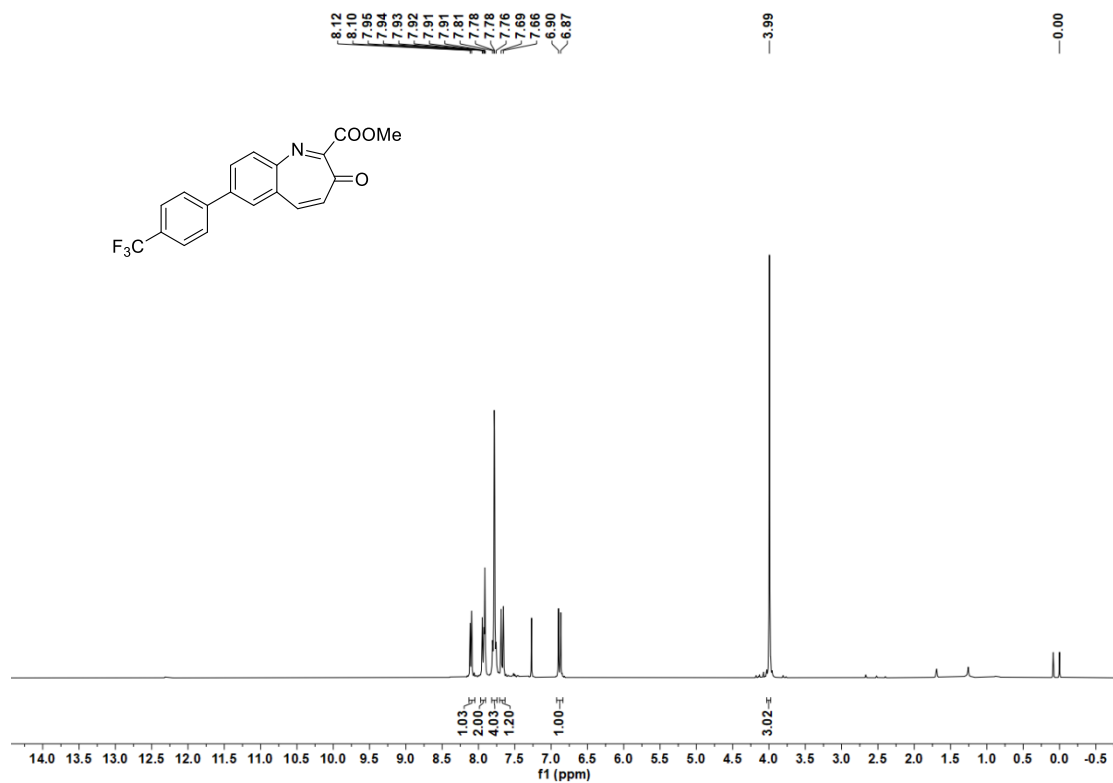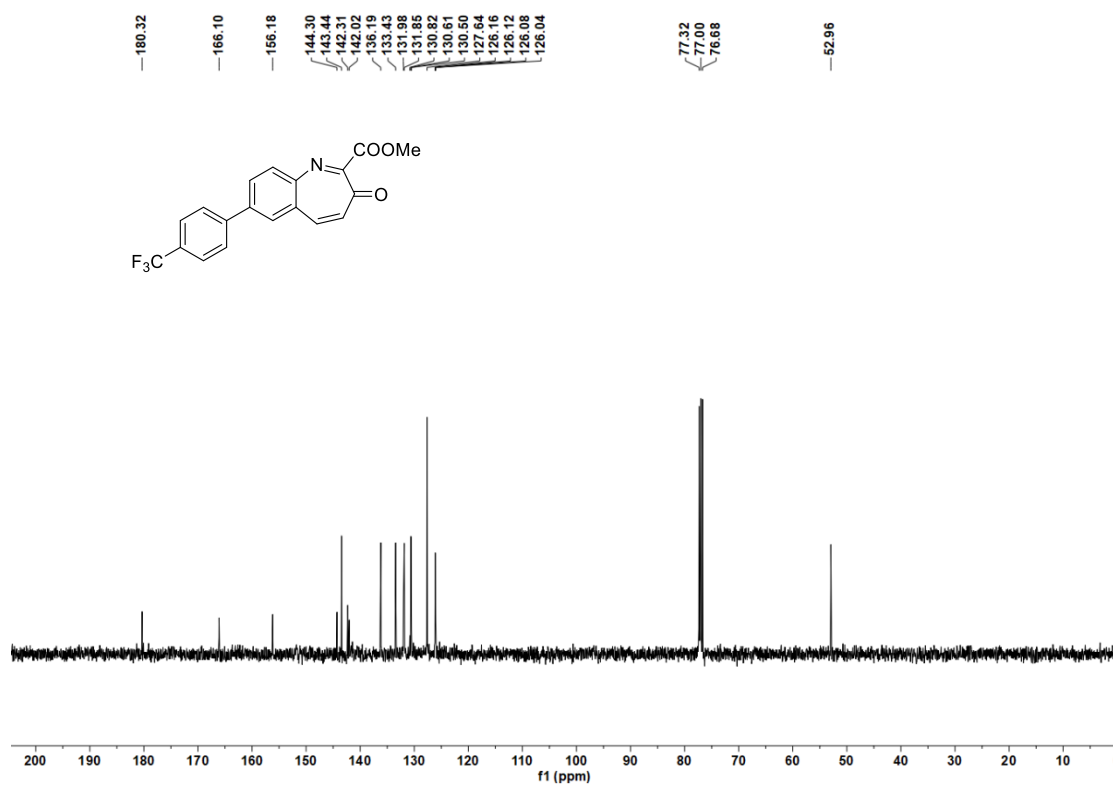

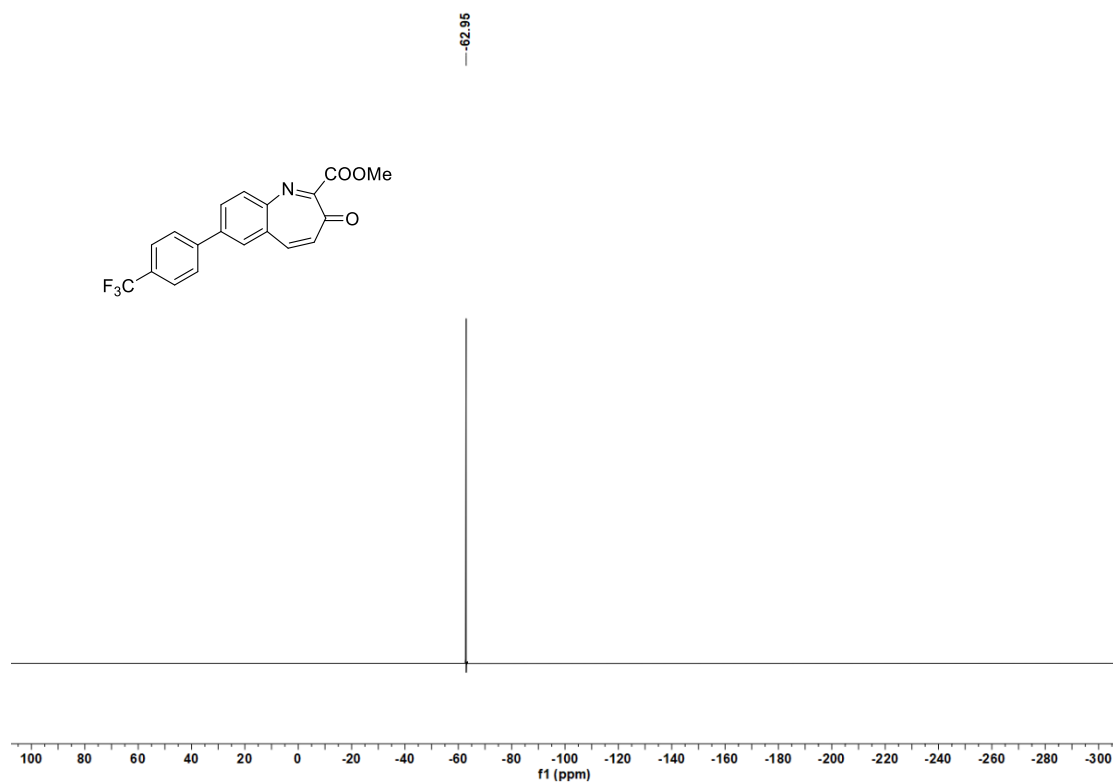

$^1\text{H-NMR}$  (400 MHz,  $\text{CDCl}_3$ ),  $^{13}\text{C NMR}$  (101 MHz,  $\text{CDCl}_3$ ),  $^{19}\text{F-NMR}$  (376 MHz,  $\text{CDCl}_3$ ) of **17**

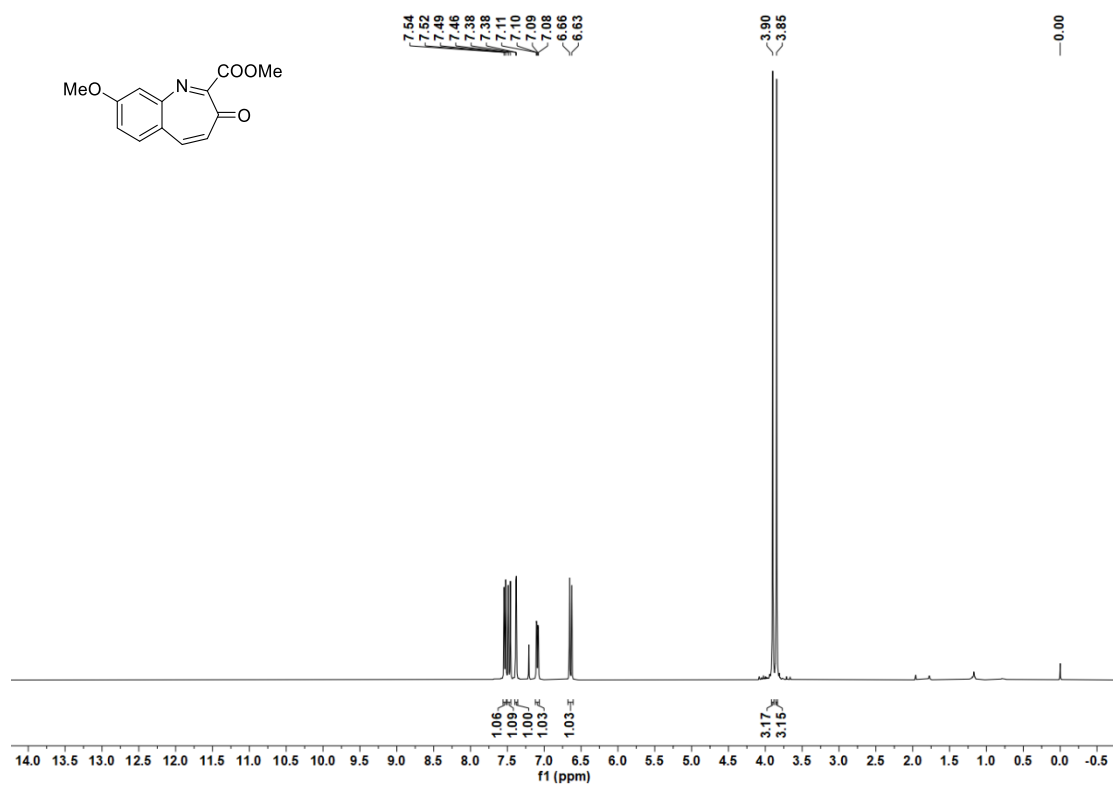

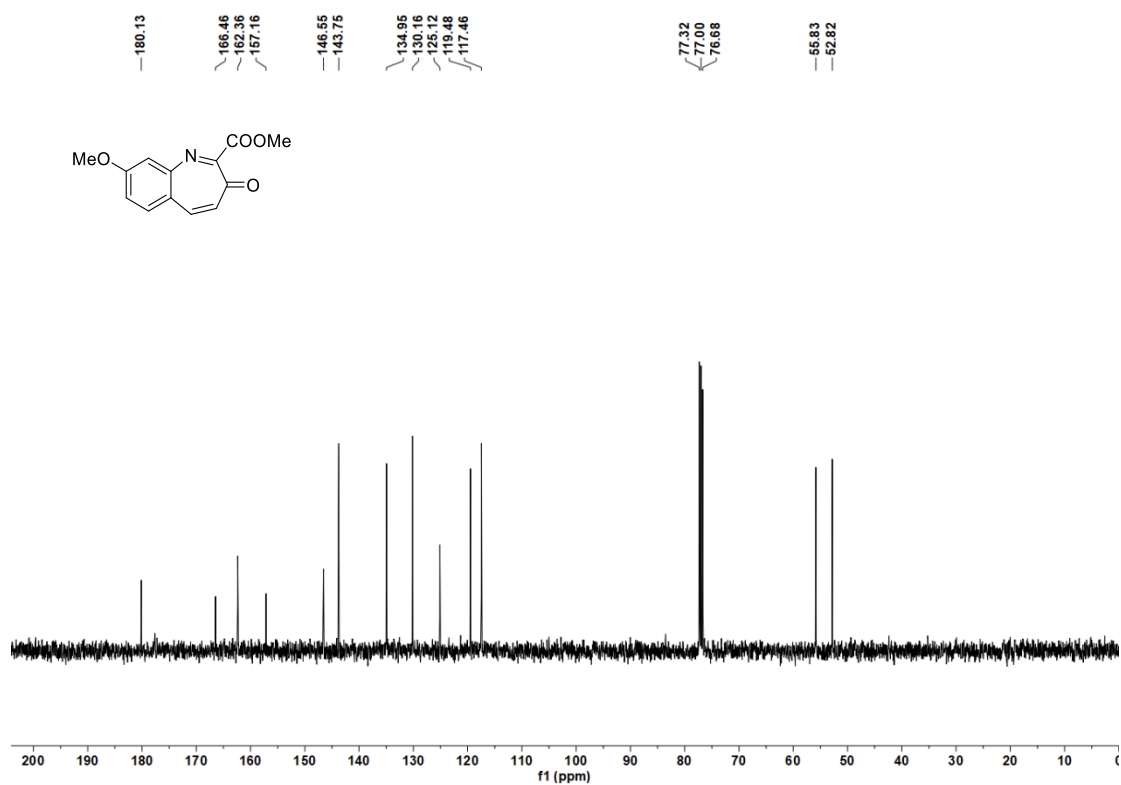

<sup>1</sup>H-NMR (400 MHz, CDCl<sub>3</sub>), <sup>13</sup>C NMR (101 MHz, CDCl<sub>3</sub>) of **18**

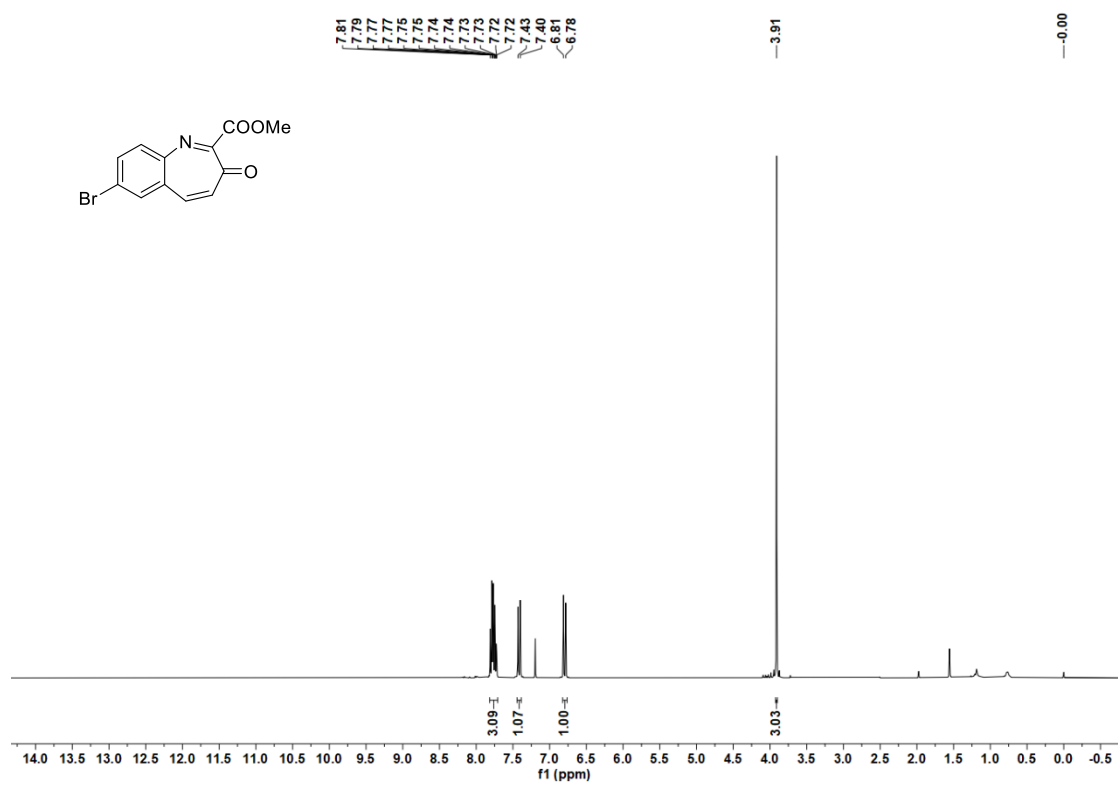

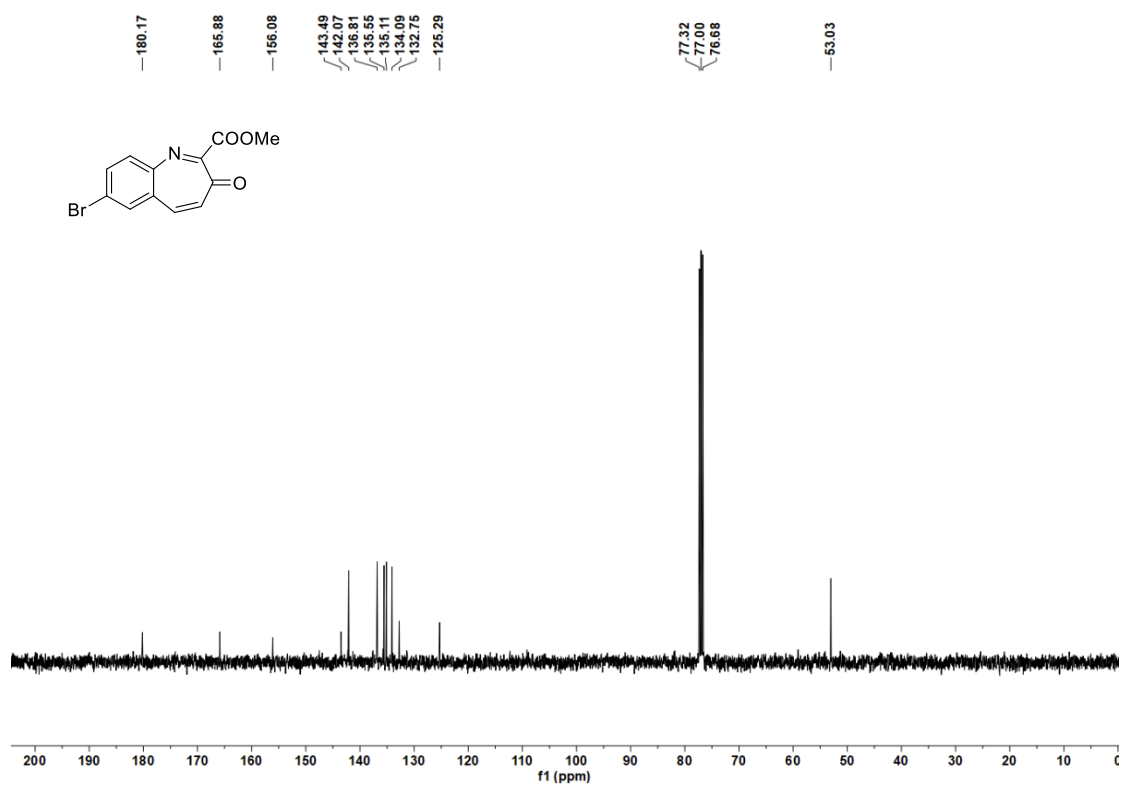

$^1\text{H-NMR}$  (400 MHz,  $\text{CDCl}_3$ ),  $^{13}\text{C NMR}$  (101 MHz,  $\text{CDCl}_3$ ) of **19**

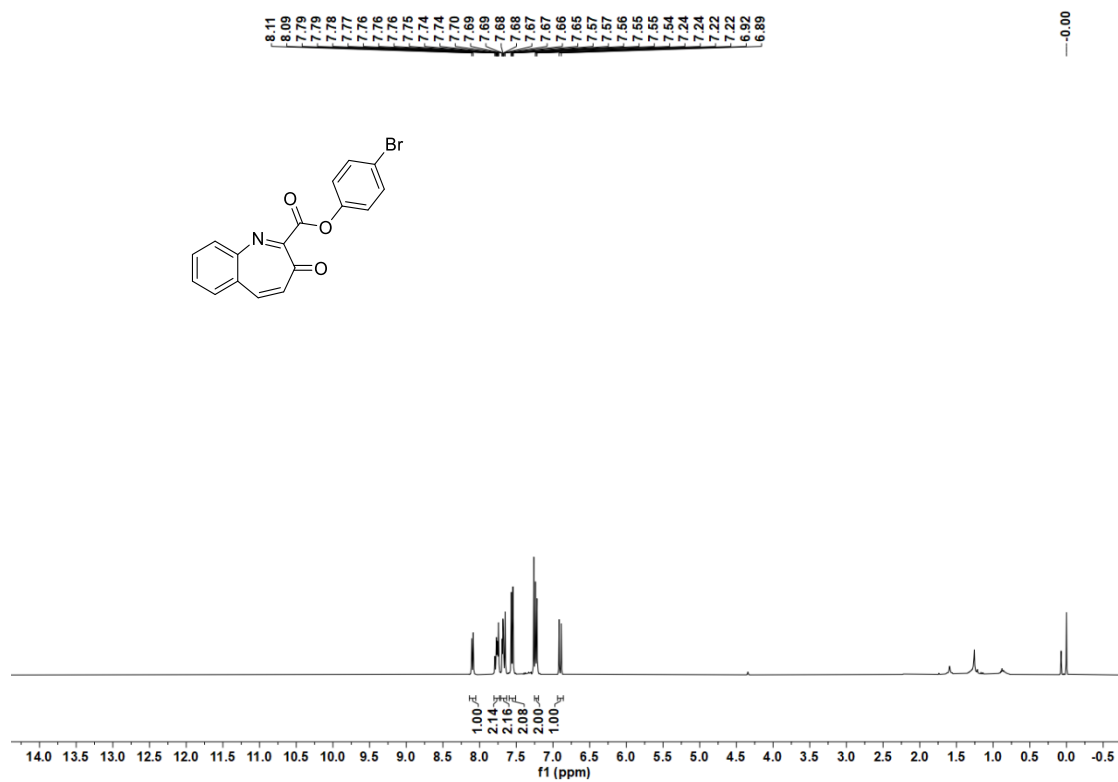

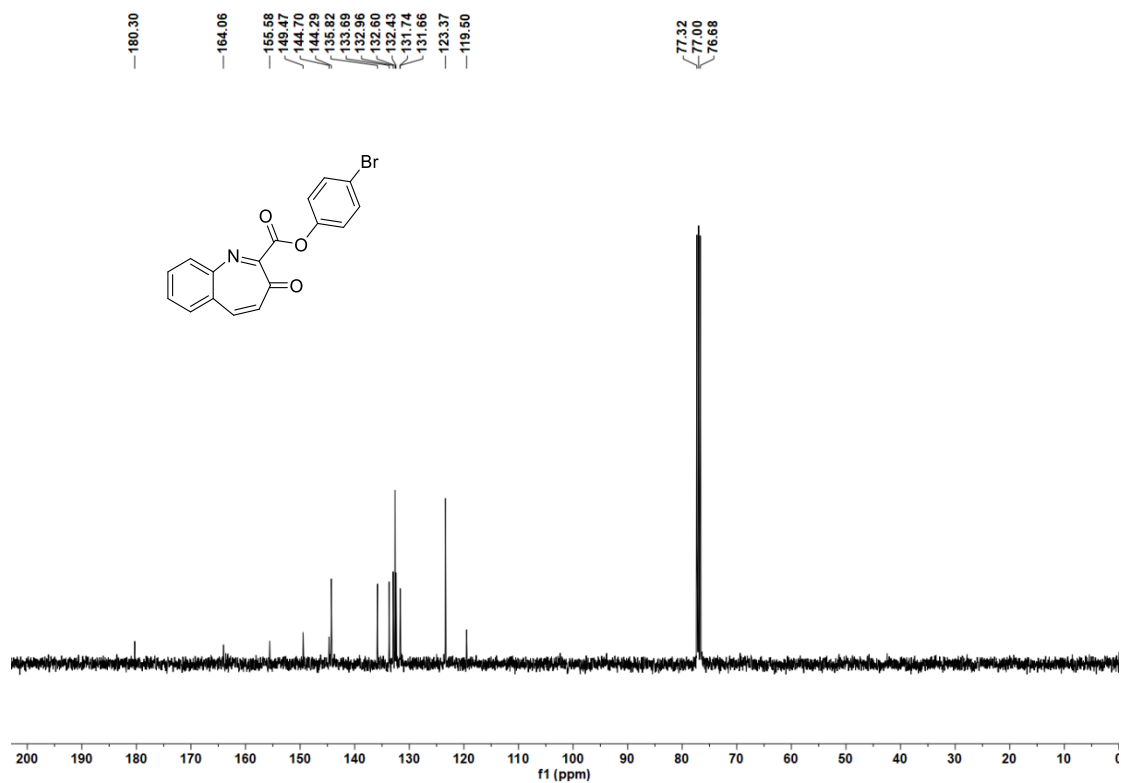

$^1\text{H}$ -NMR (400 MHz,  $\text{CDCl}_3$ ),  $^{13}\text{C}$  NMR (101 MHz,  $\text{CDCl}_3$ ) of **20**

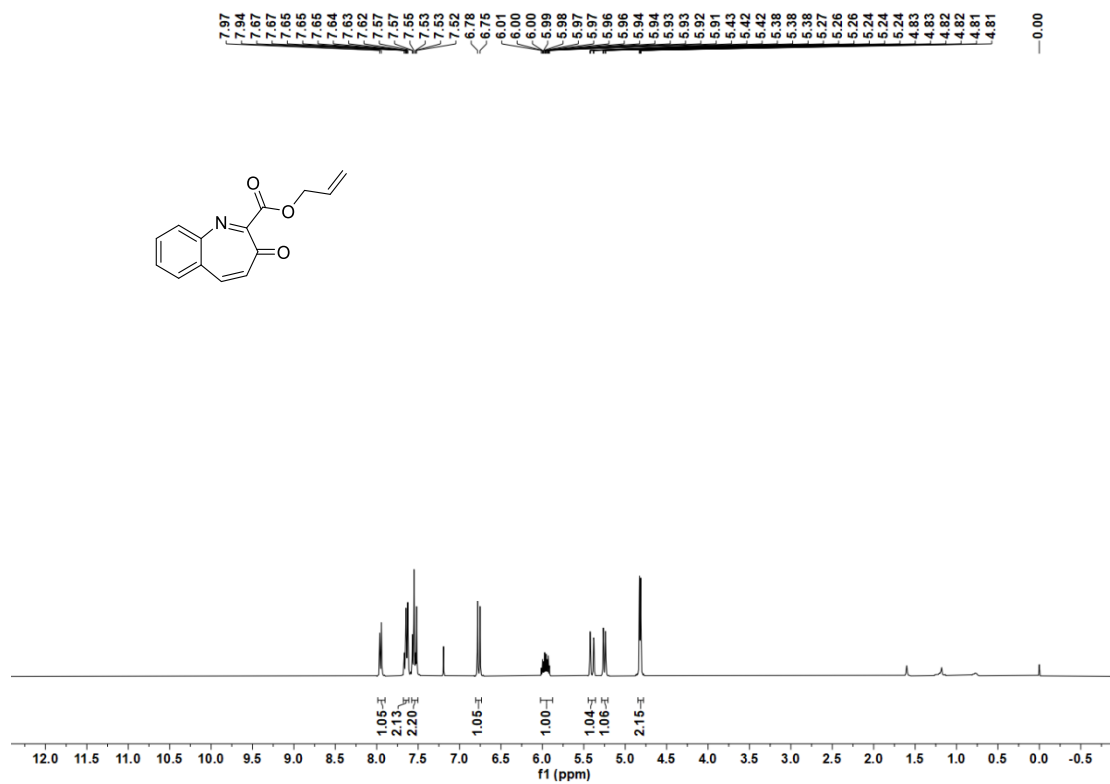

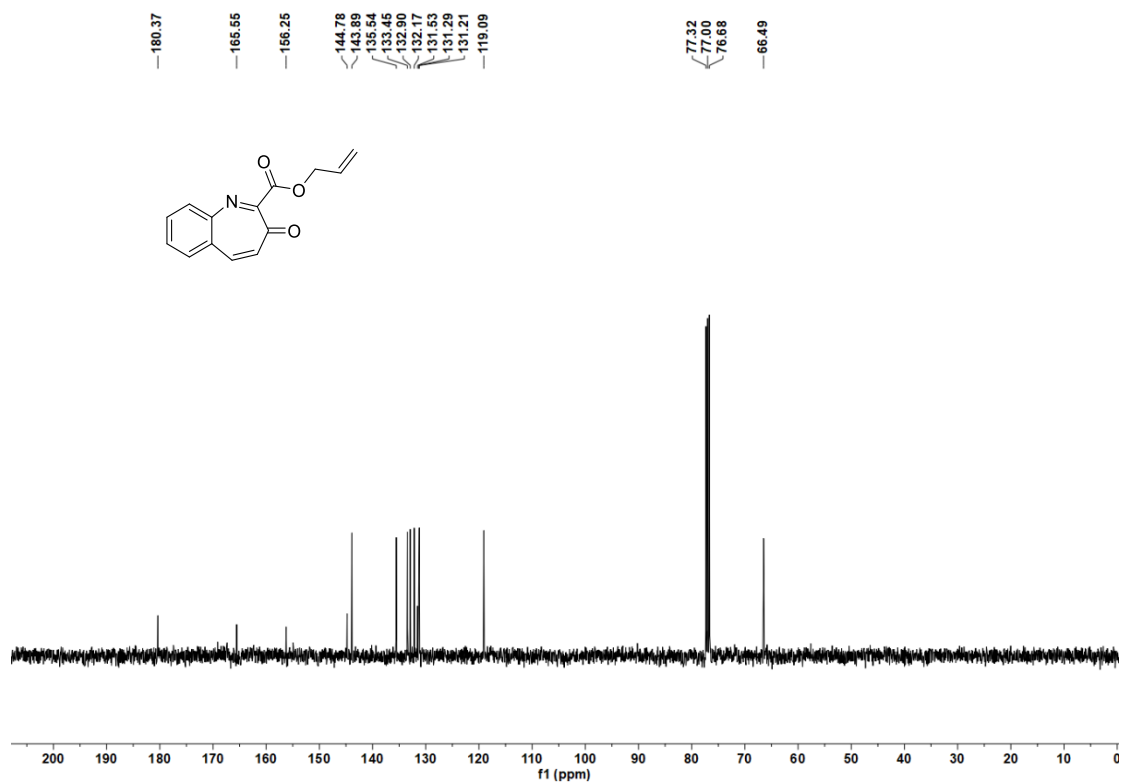

$^1\text{H-NMR}$  (400 MHz,  $\text{CDCl}_3$ ),  $^{13}\text{C}$  NMR (101 MHz,  $\text{CDCl}_3$ ) of **21**

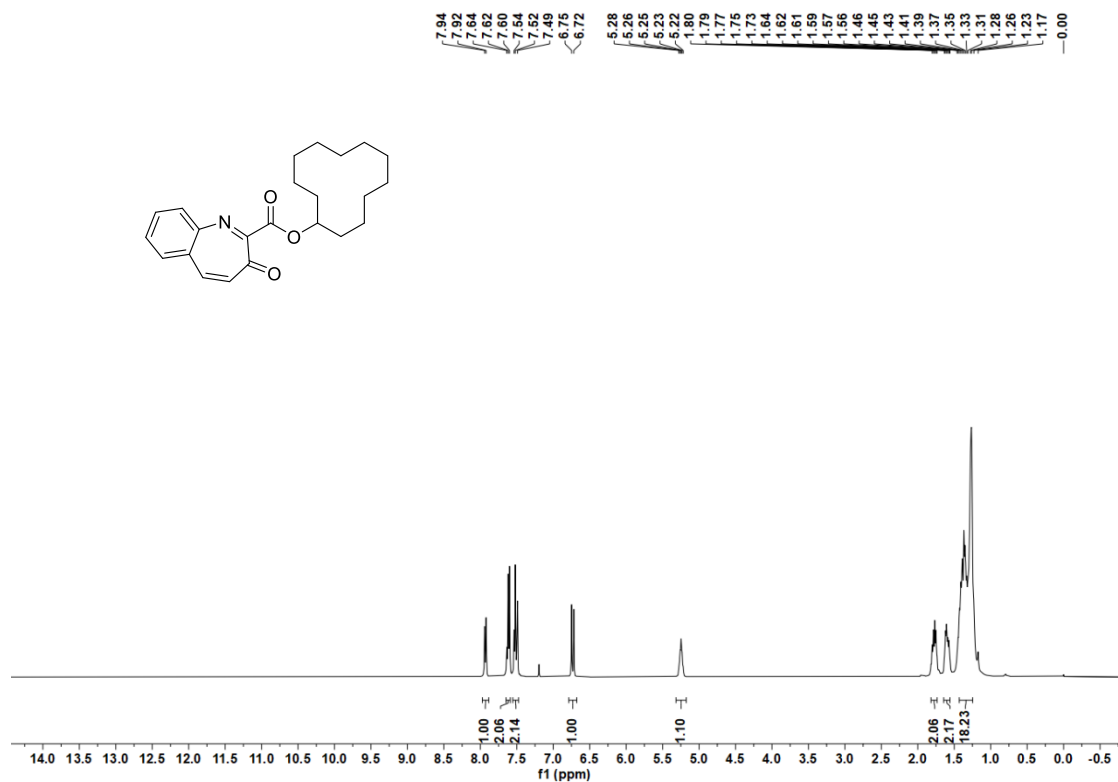

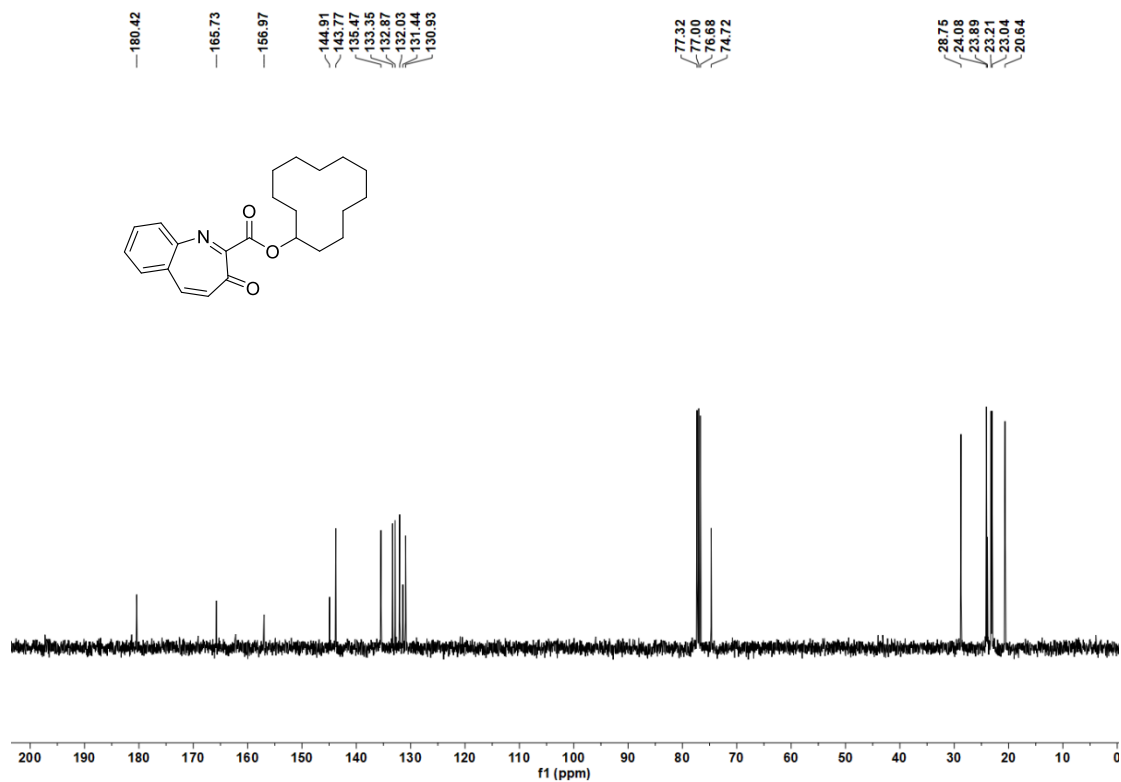

$^1\text{H-NMR}$  (400 MHz,  $\text{CDCl}_3$ ),  $^{13}\text{C}$  NMR (101 MHz,  $\text{CDCl}_3$ ) of **22**

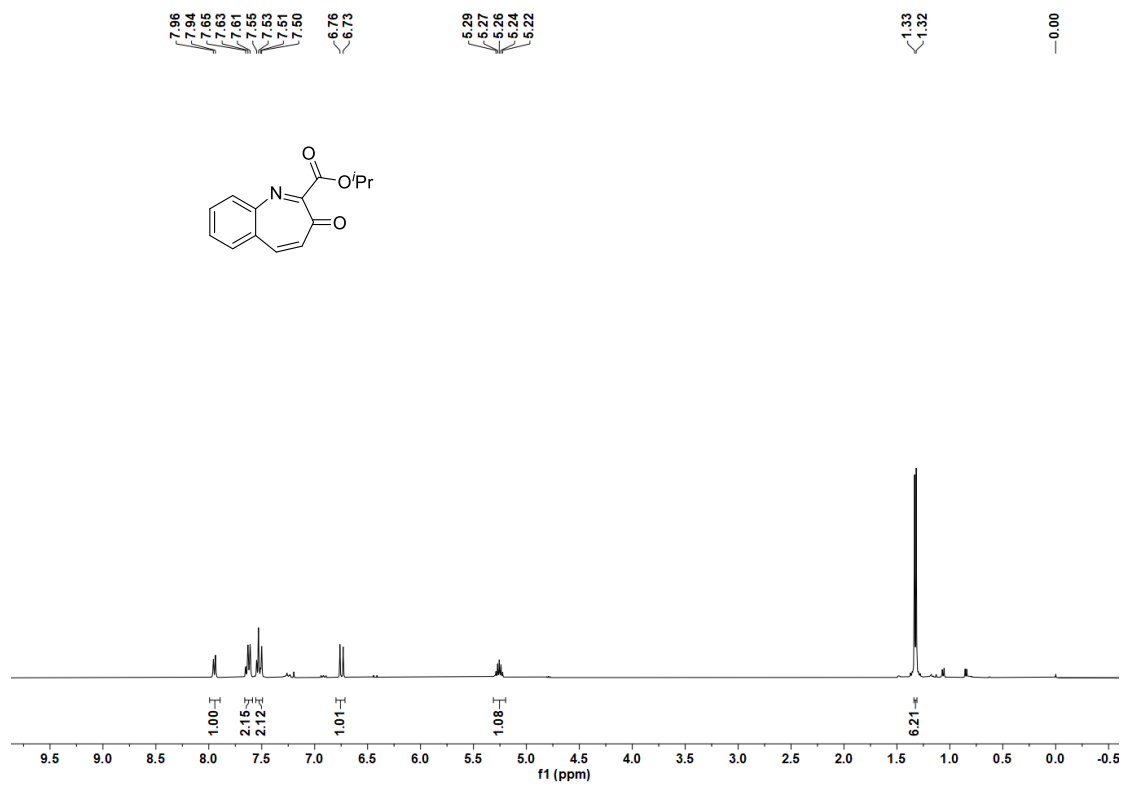



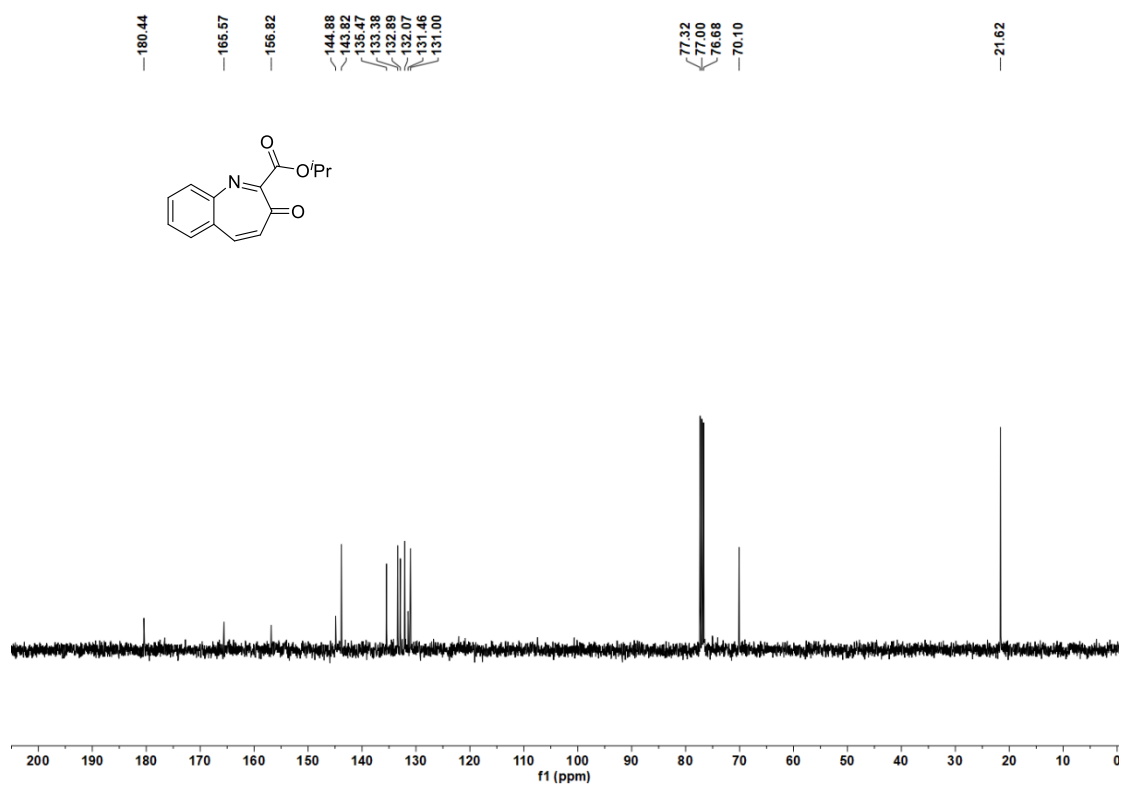

$^1\text{H-NMR}$  (400 MHz,  $\text{CDCl}_3$ ),  $^{13}\text{C NMR}$  (101 MHz,  $\text{CDCl}_3$ ) of **23**

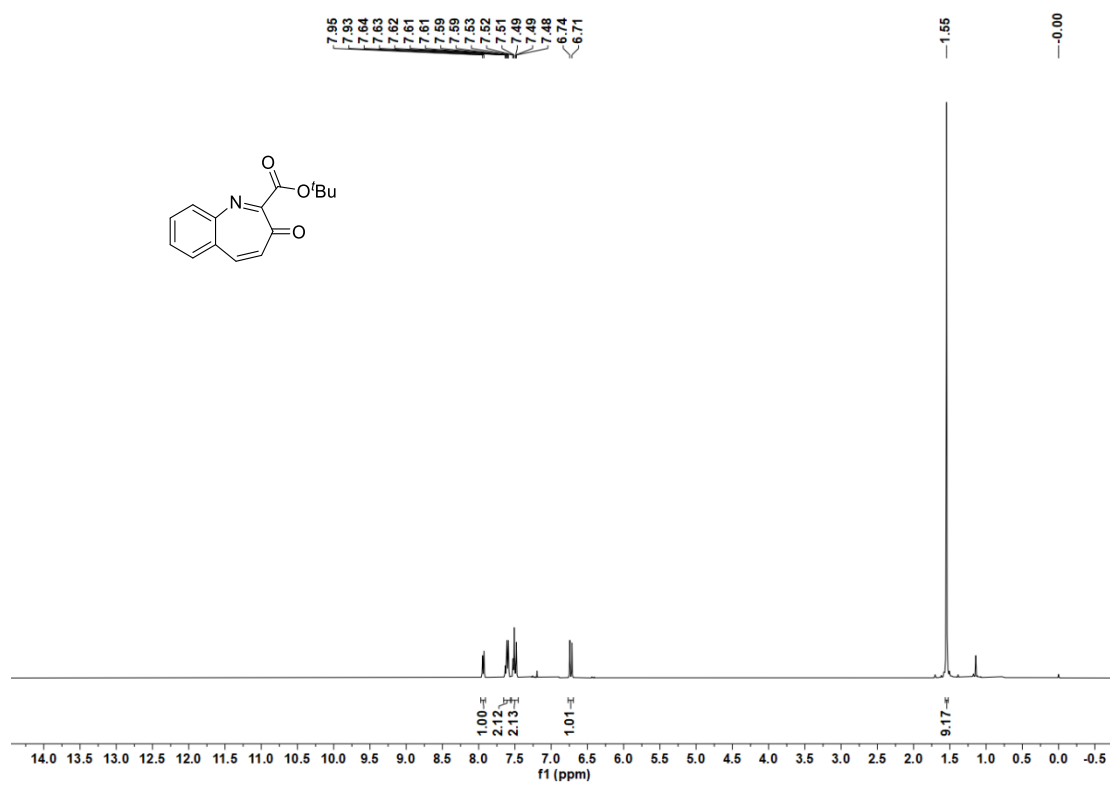

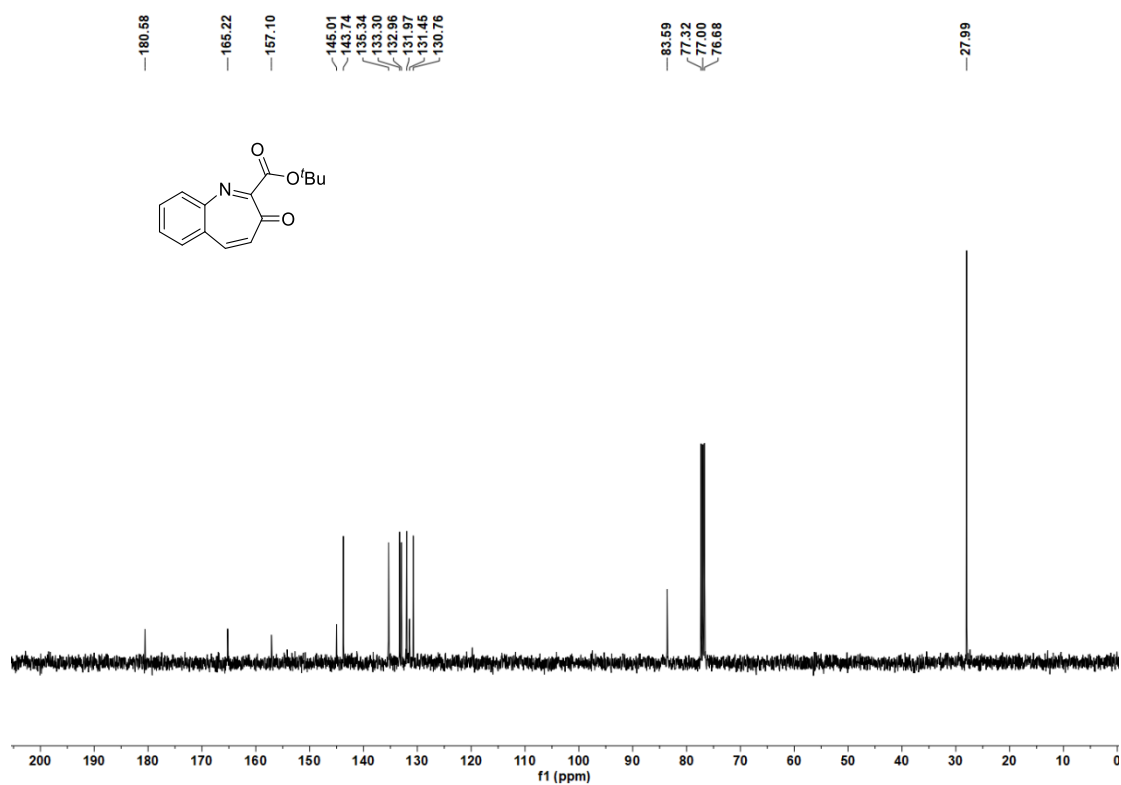

$^1\text{H}$ -NMR (400 MHz,  $\text{CDCl}_3$ ),  $^{13}\text{C}$  NMR (101 MHz,  $\text{CDCl}_3$ ) of **24**

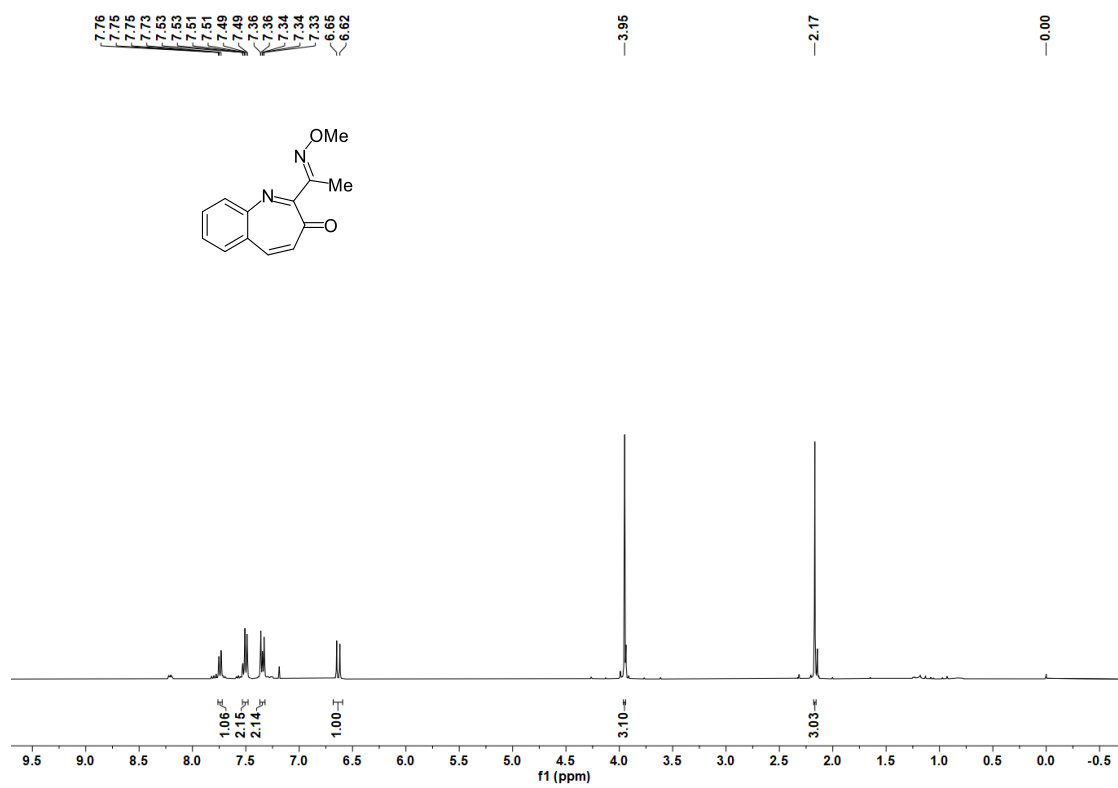

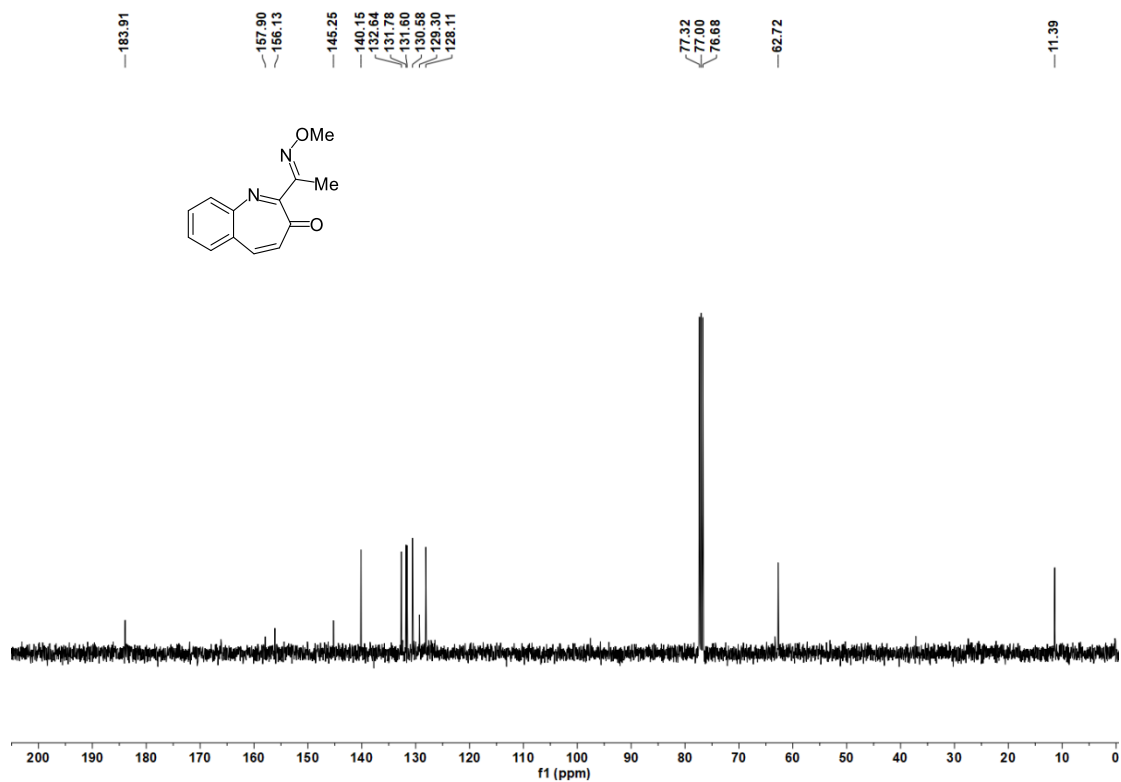

$^1\text{H}$ -NMR (400 MHz,  $\text{CDCl}_3$ ),  $^{13}\text{C}$  NMR (101 MHz,  $\text{CDCl}_3$ ) of **25**

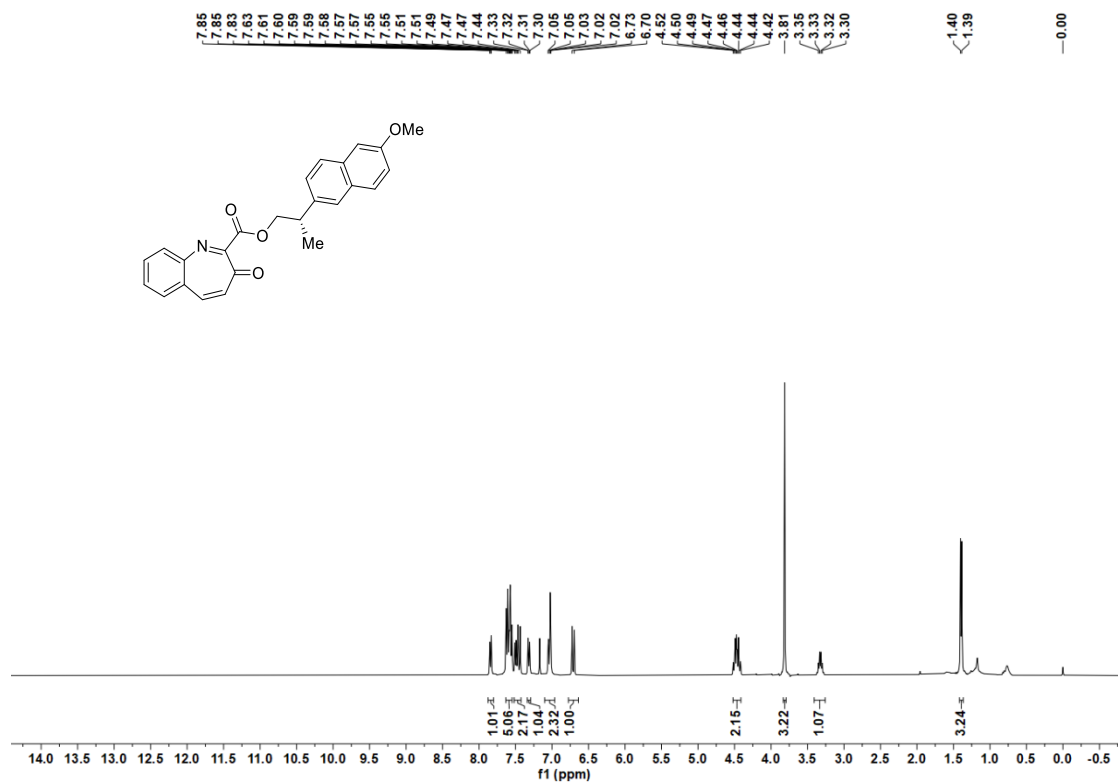

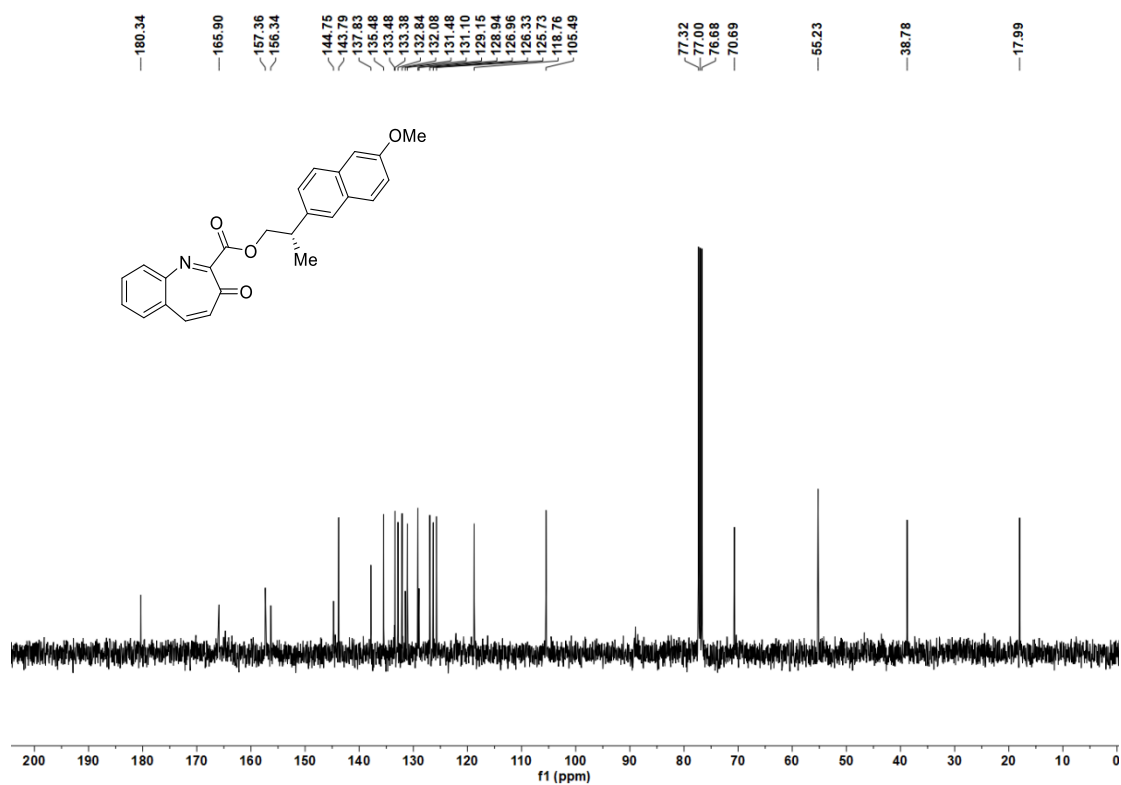

$^1\text{H-NMR}$  (400 MHz,  $\text{CDCl}_3$ ),  $^{13}\text{C}$  NMR (101 MHz,  $\text{CDCl}_3$ ) of **26**

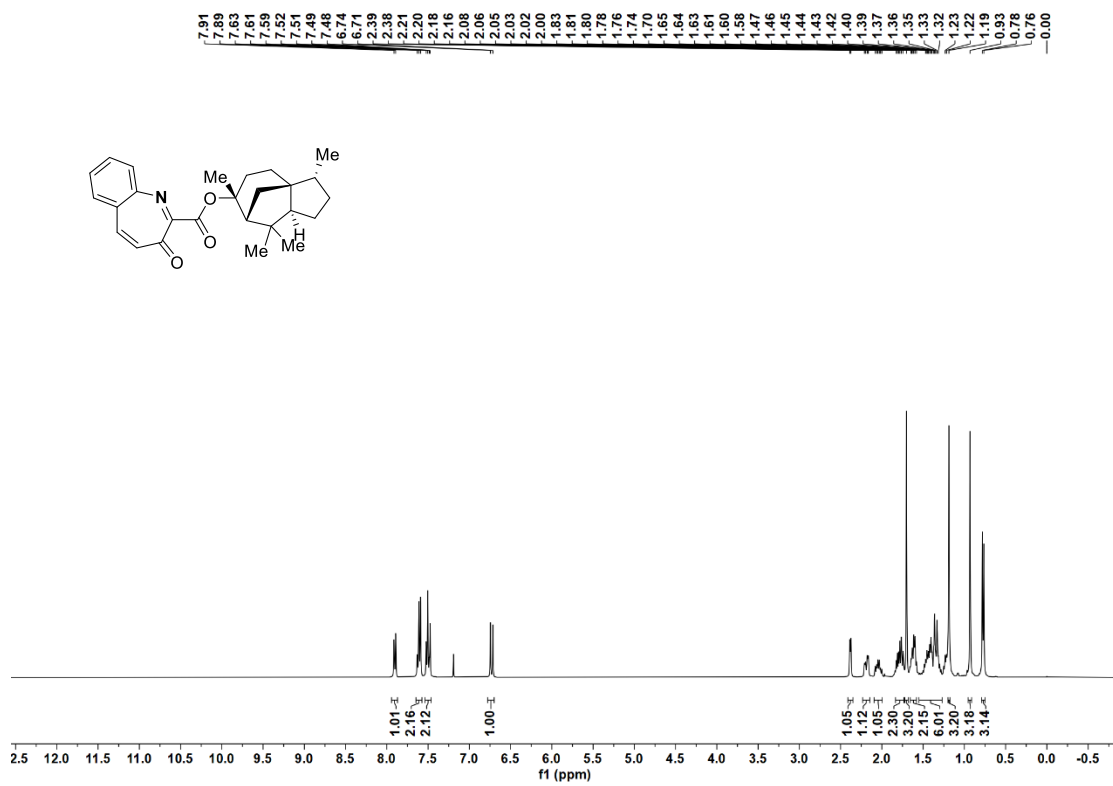

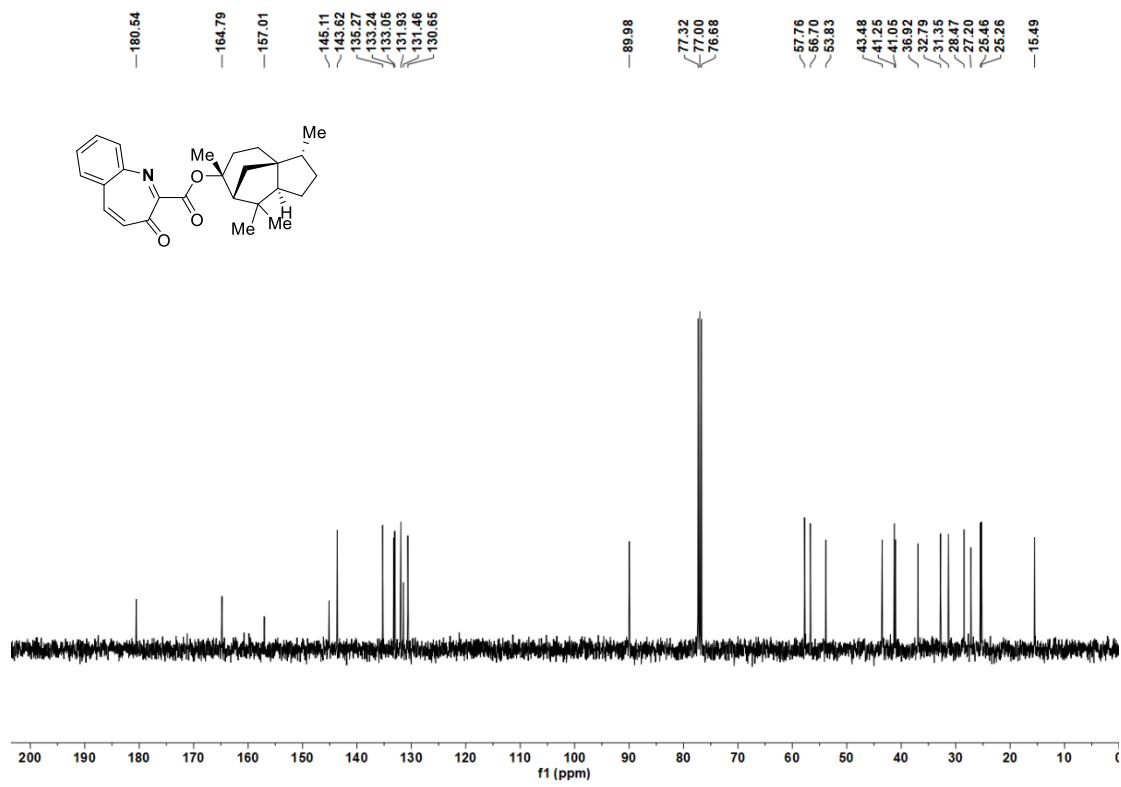

$^1\text{H}$ -NMR (400 MHz,  $\text{CDCl}_3$ ),  $^{13}\text{C}$  NMR (101 MHz,  $\text{CDCl}_3$ ) of **27**

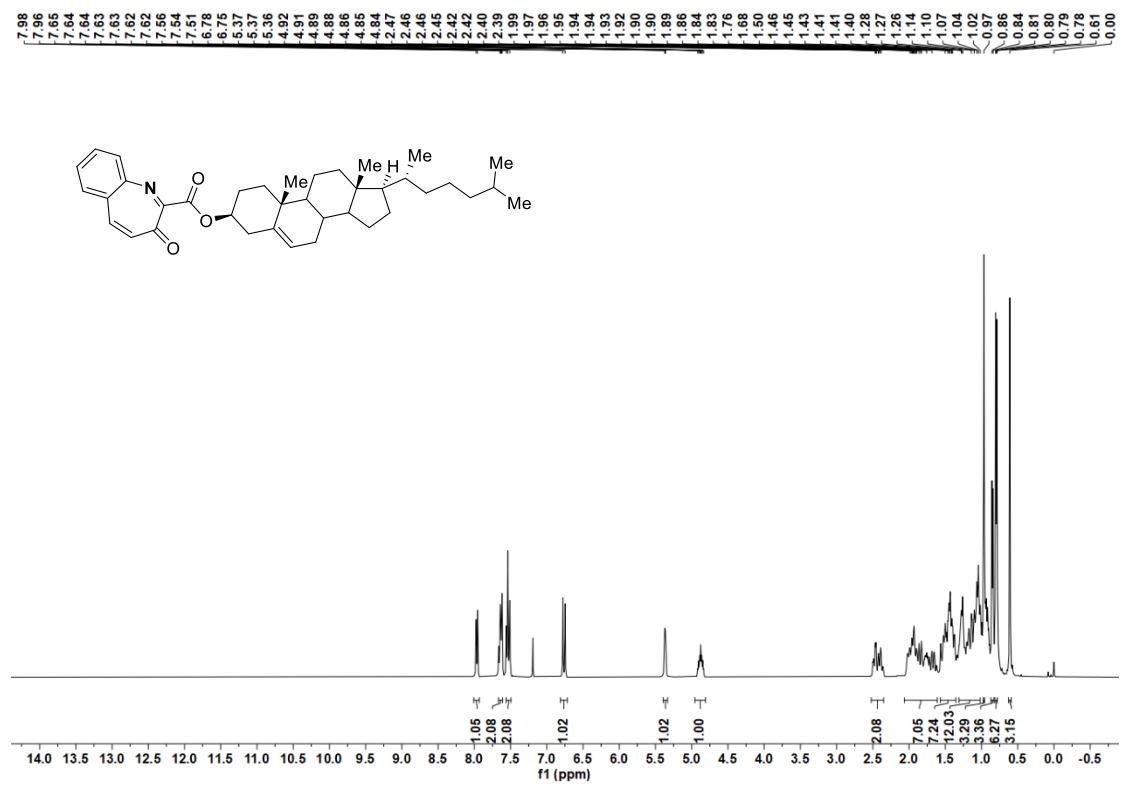

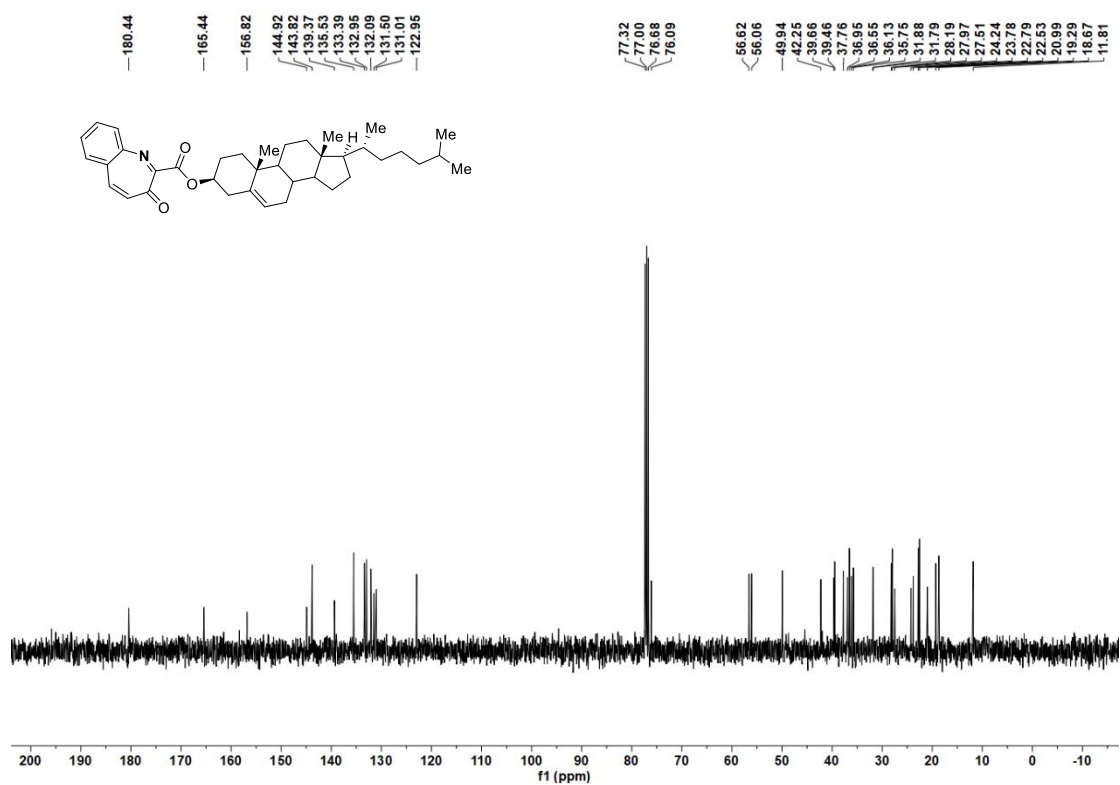

$^1\text{H}$ -NMR (400 MHz,  $\text{CDCl}_3$ ),  $^{13}\text{C}$  NMR (101 MHz,  $\text{CDCl}_3$ ) of **28**

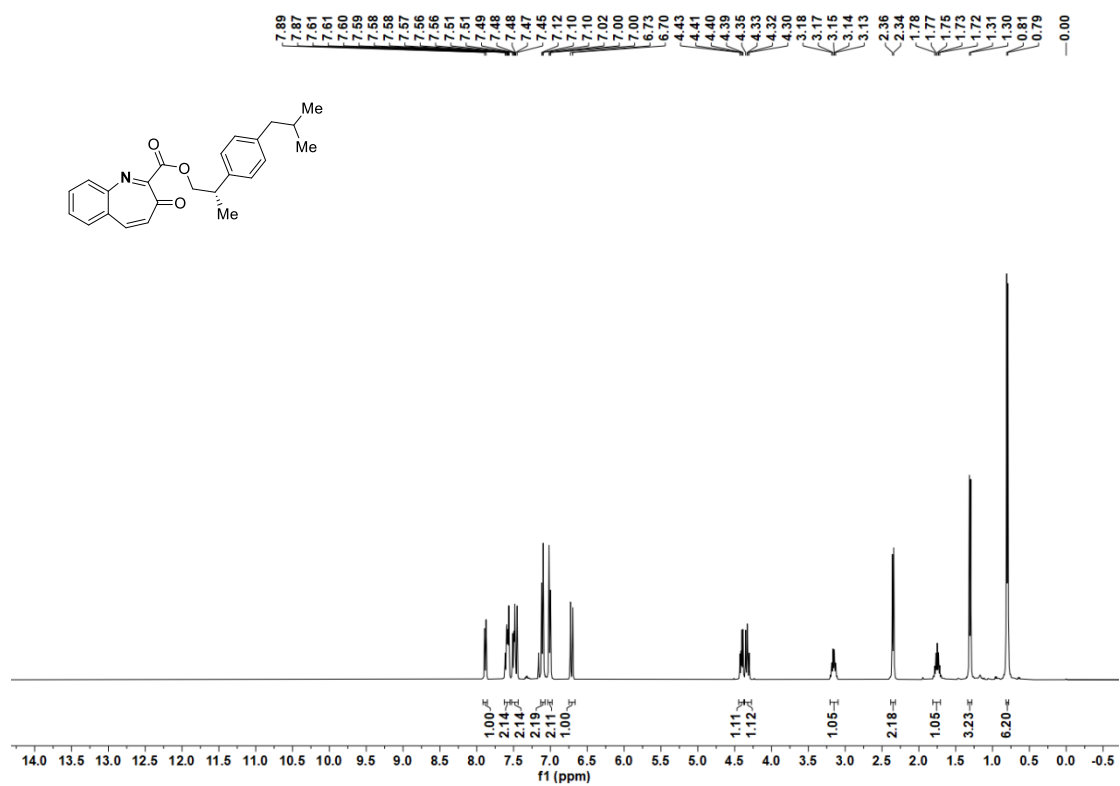

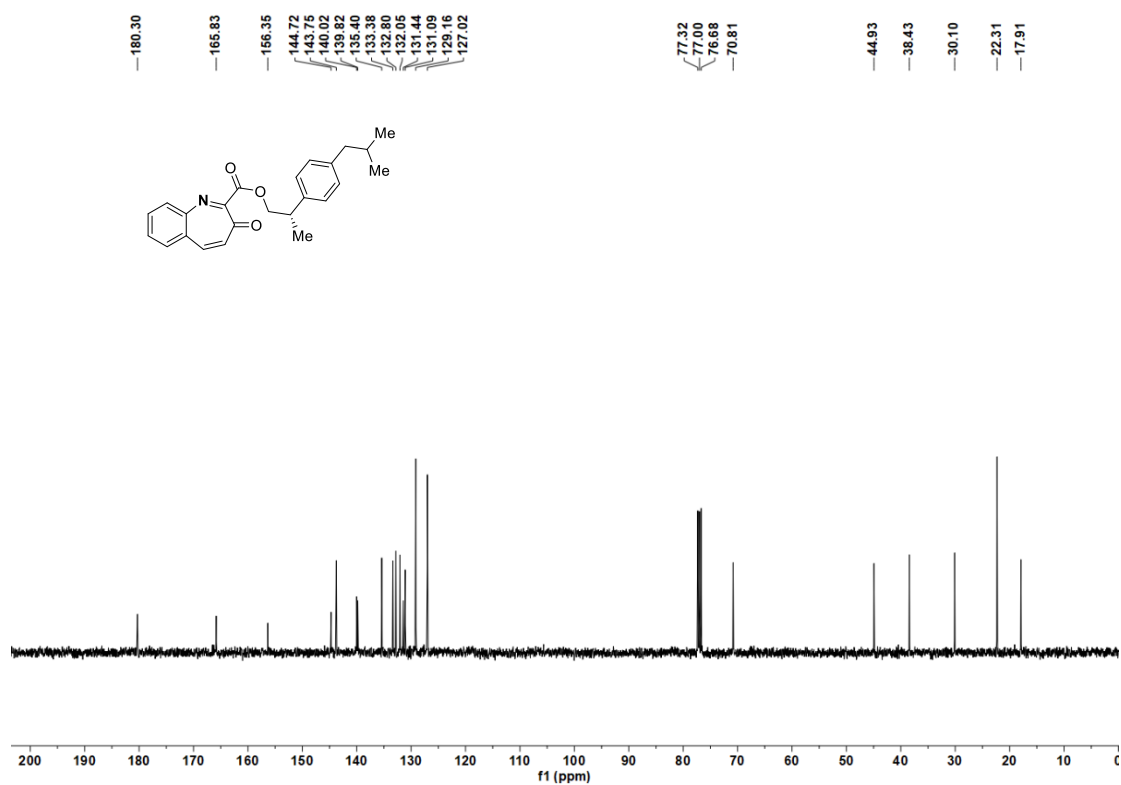

$^1\text{H}$ -NMR (400 MHz,  $\text{CDCl}_3$ ),  $^{13}\text{C}$  NMR (101 MHz,  $\text{CDCl}_3$ ) of **29**

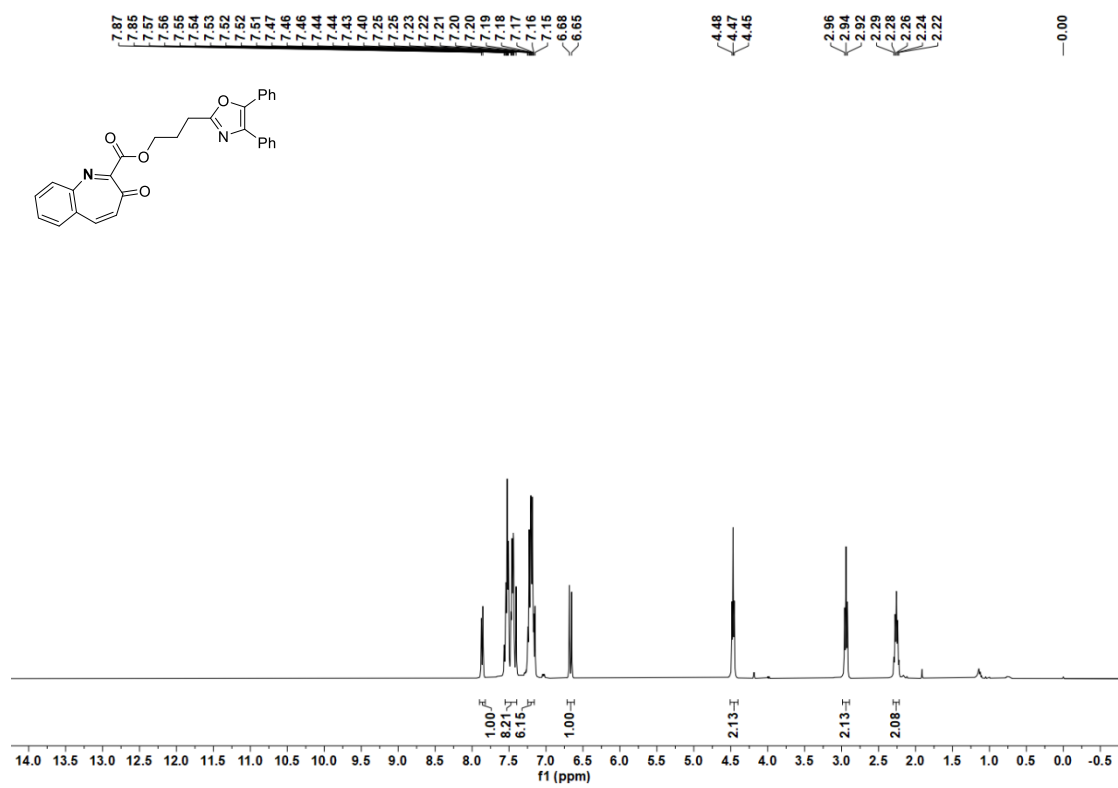

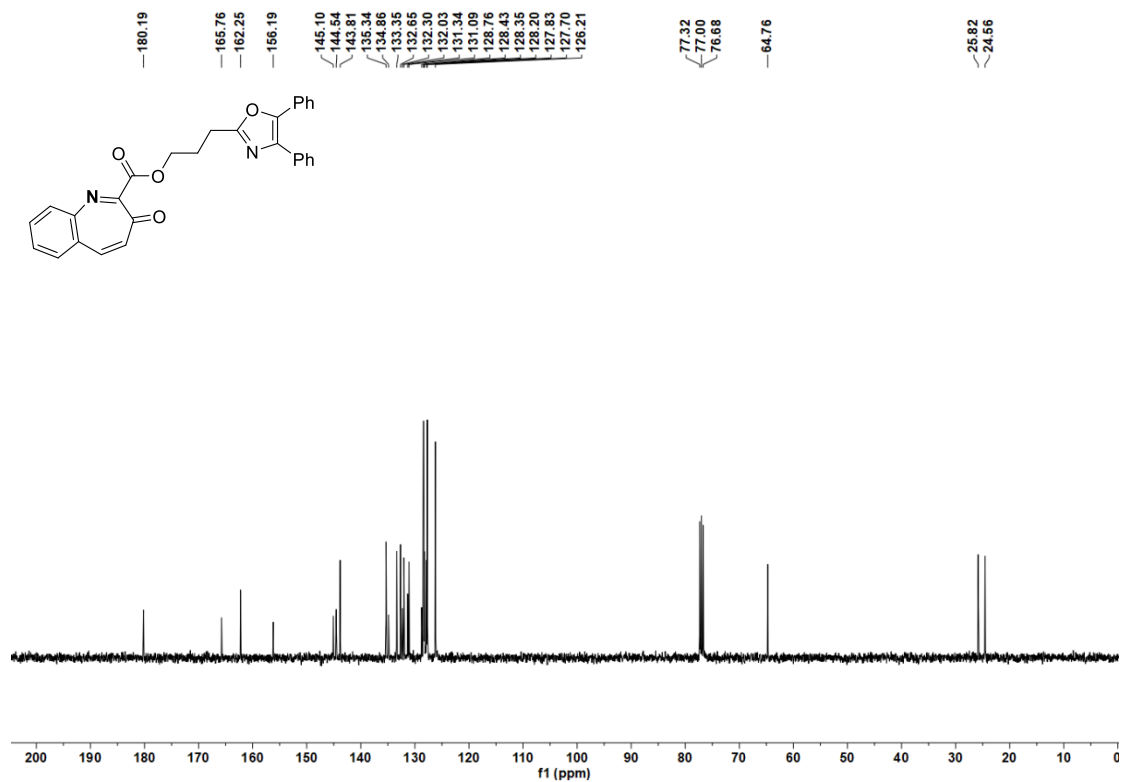

$^1\text{H-NMR}$  (400 MHz,  $\text{CDCl}_3$ ),  $^{13}\text{C NMR}$  (101 MHz,  $\text{CDCl}_3$ ) of 30

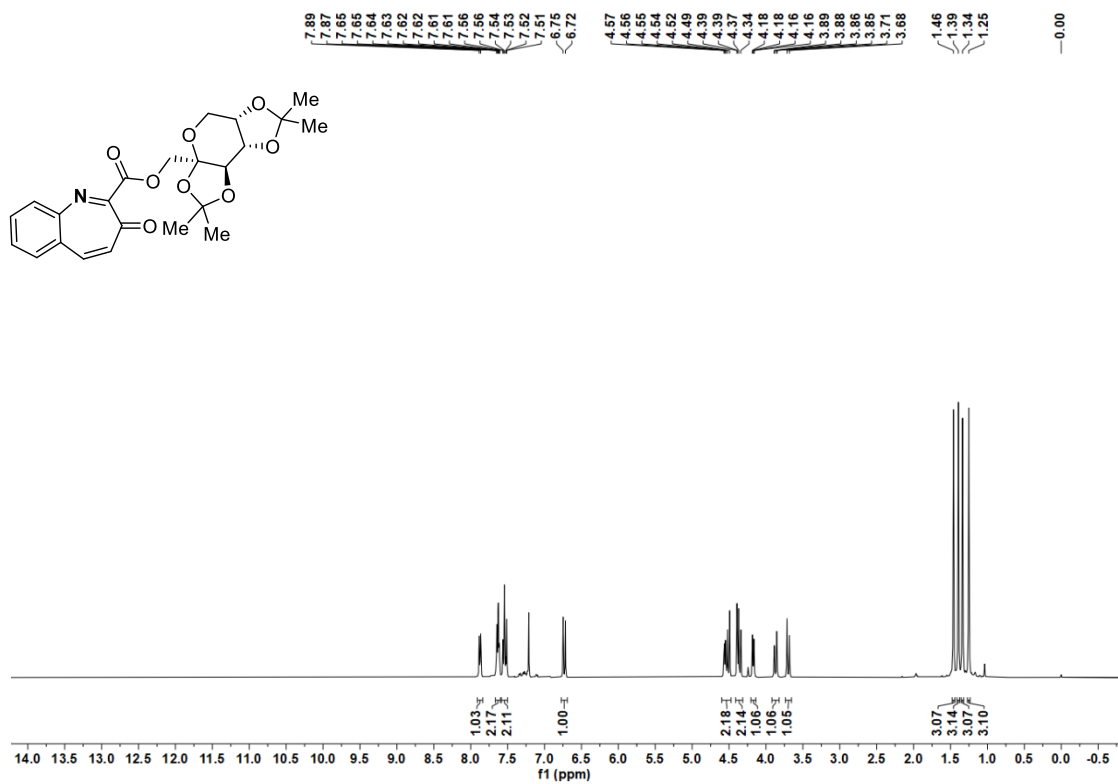



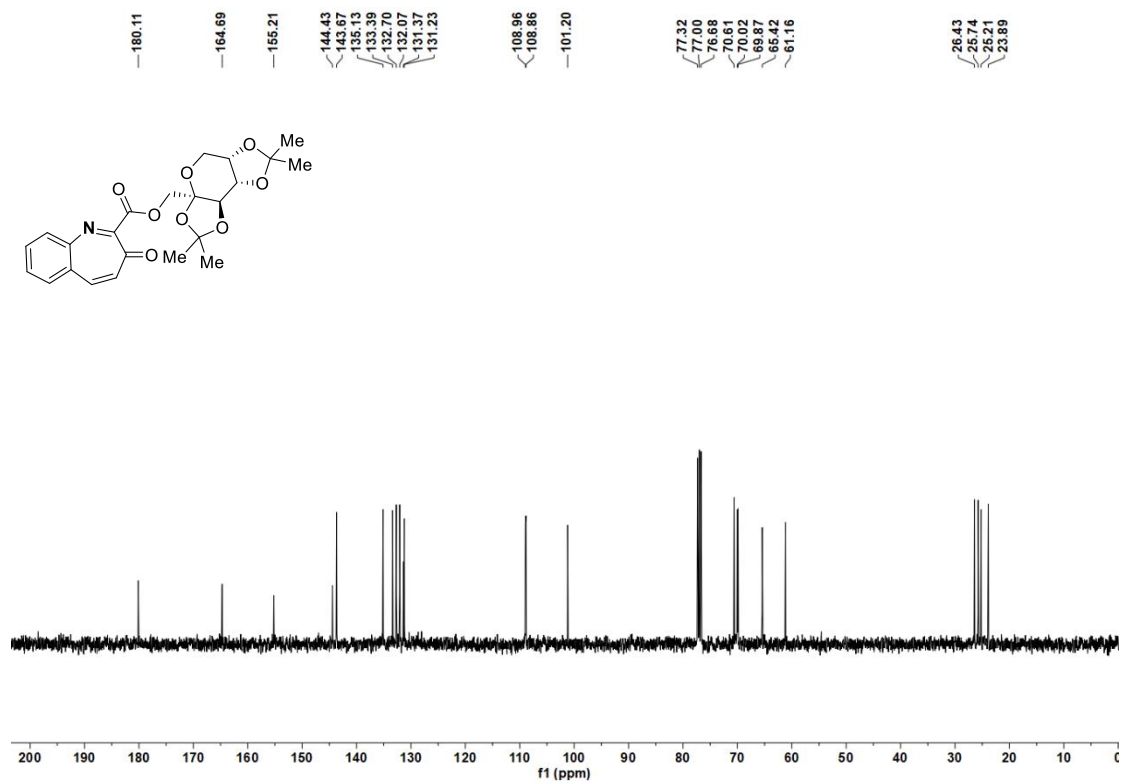

$^1\text{H-NMR}$  (400 MHz,  $\text{CDCl}_3$ ),  $^{13}\text{C}$  NMR (101 MHz,  $\text{CDCl}_3$ ) of **31**

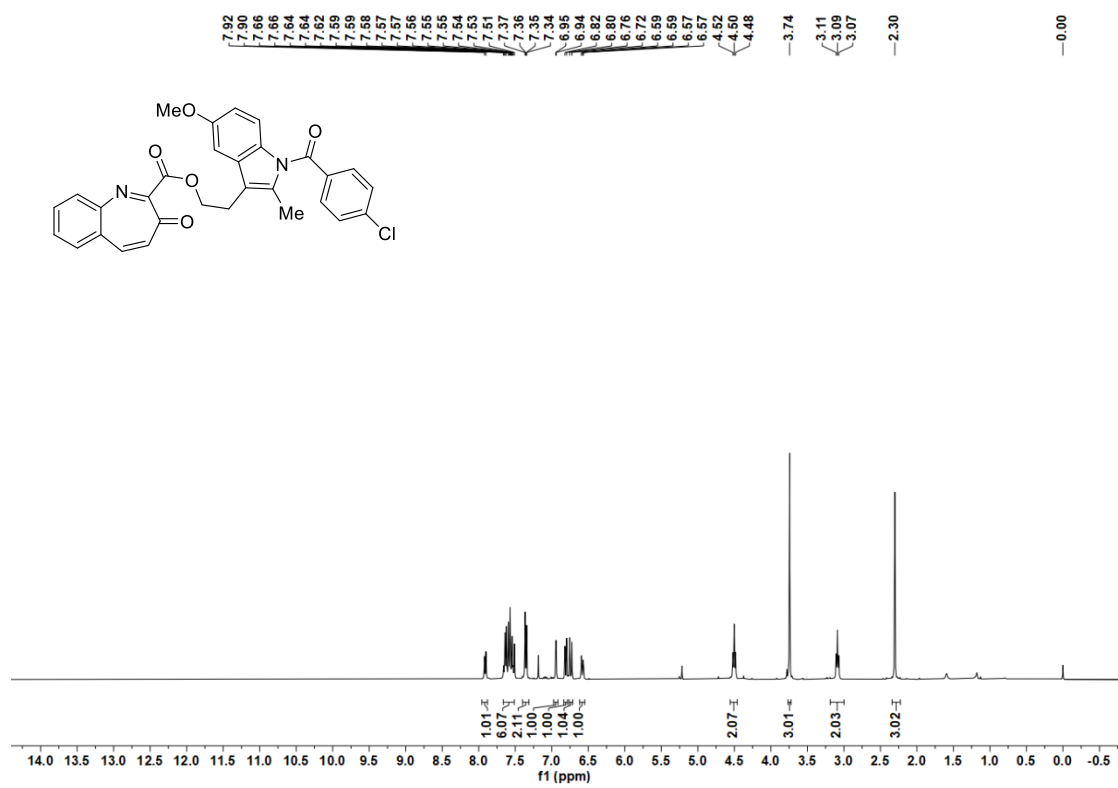

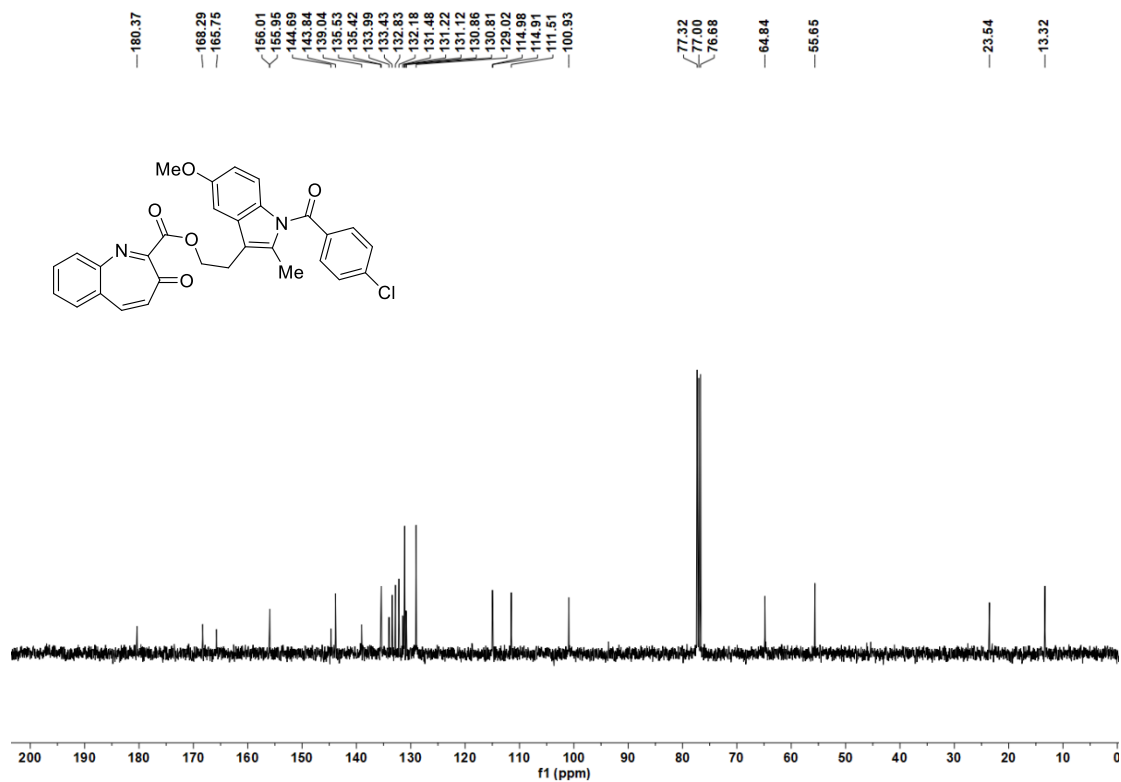

<sup>1</sup>H-NMR (400 MHz, CDCl<sub>3</sub>), <sup>13</sup>C NMR (101 MHz, CDCl<sub>3</sub>) of **32**

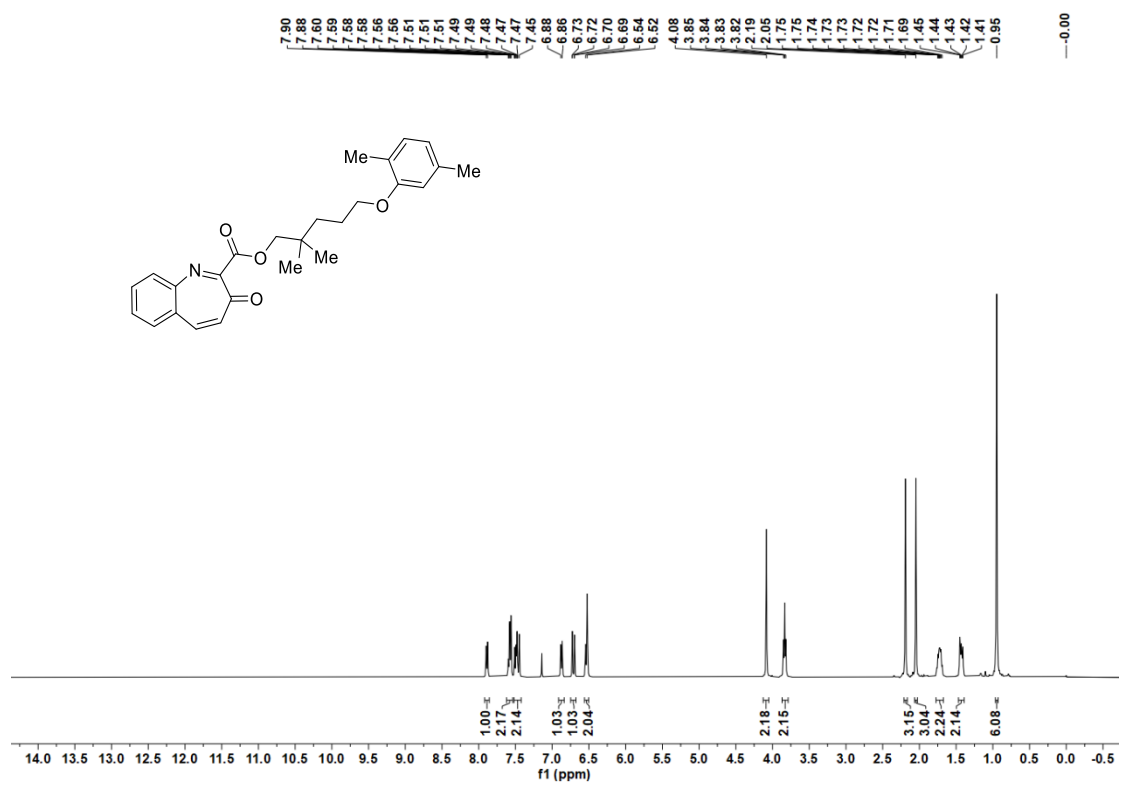

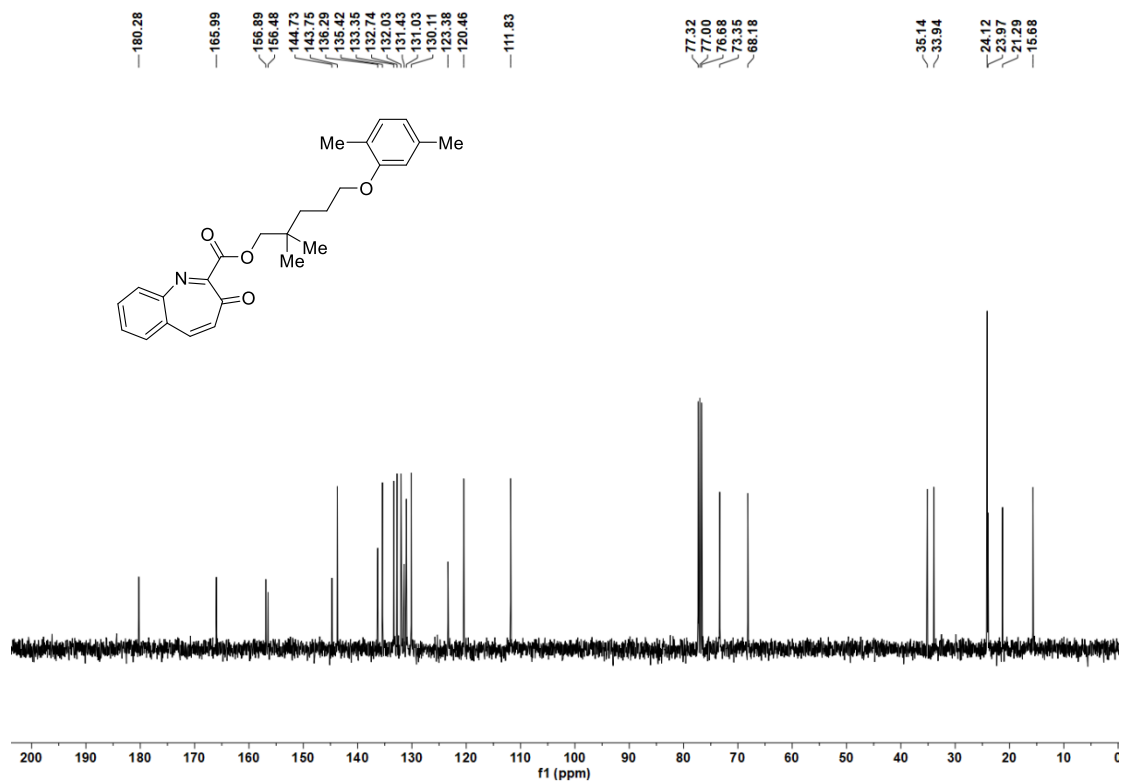

$^1\text{H-NMR}$  (400 MHz,  $\text{CDCl}_3$ ),  $^{13}\text{C NMR}$  (101 MHz,  $\text{CDCl}_3$ ) of **33**

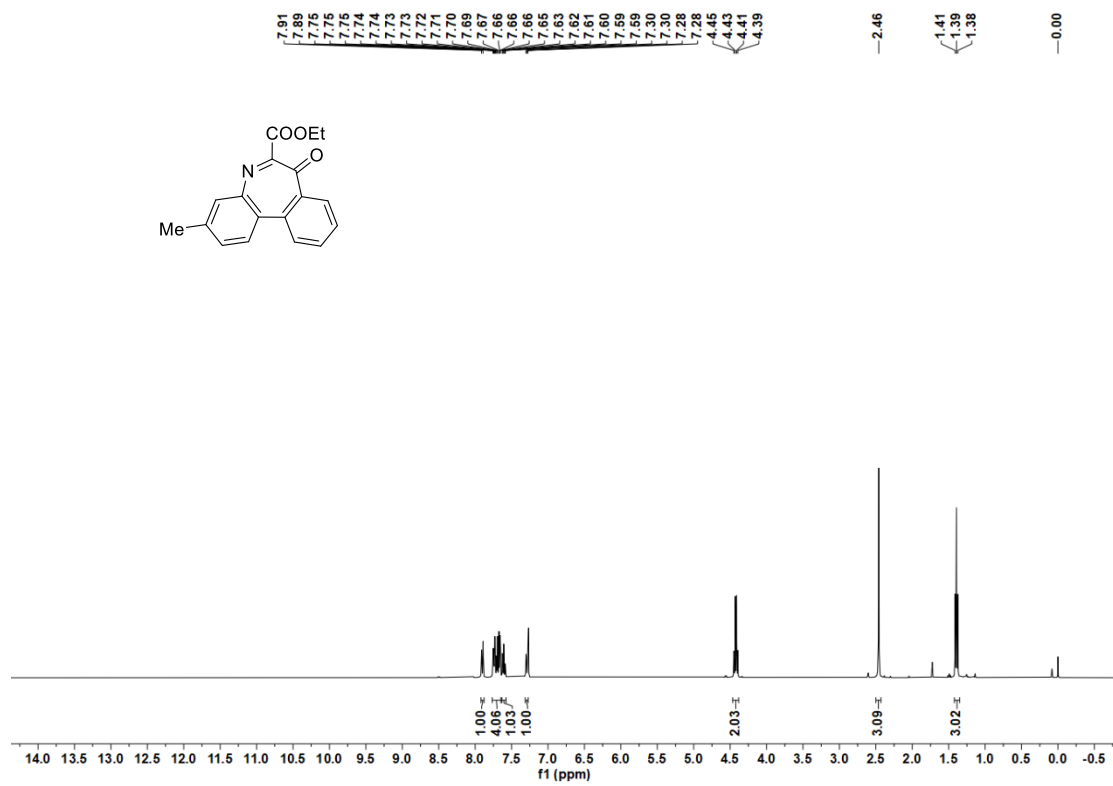

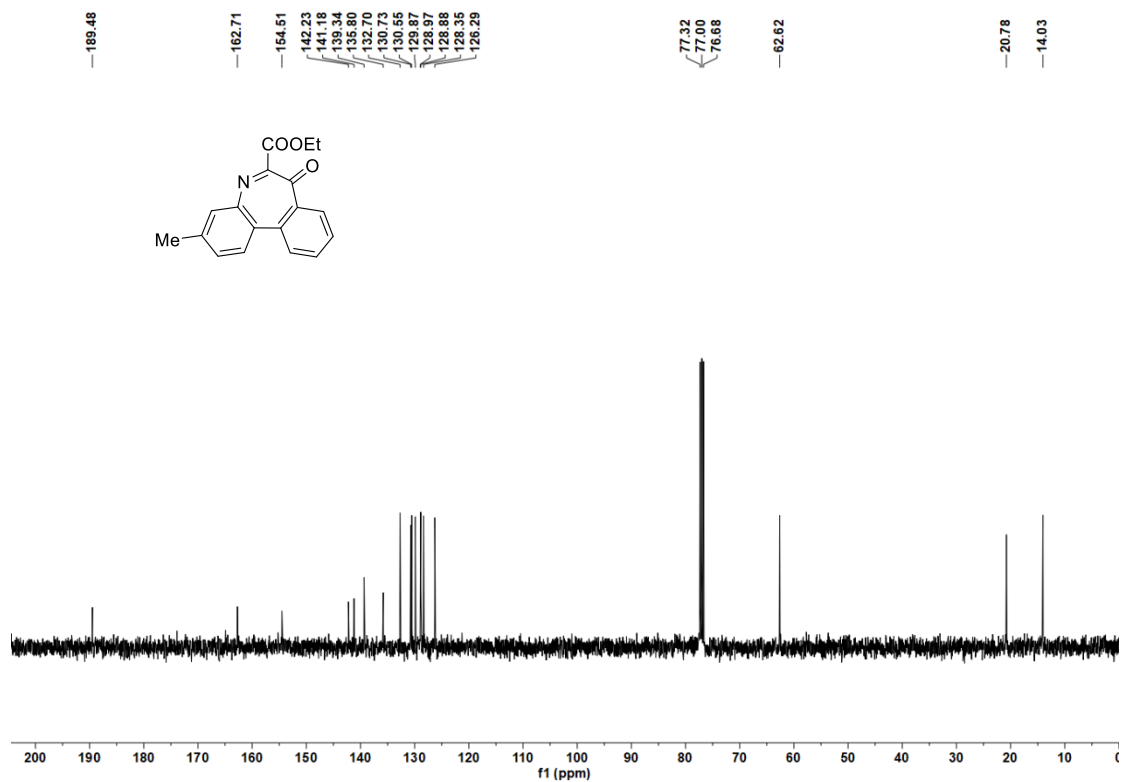

$^1\text{H}$ -NMR (400 MHz,  $\text{CDCl}_3$ ),  $^{13}\text{C}$  NMR (101 MHz,  $\text{CDCl}_3$ ) of **34**

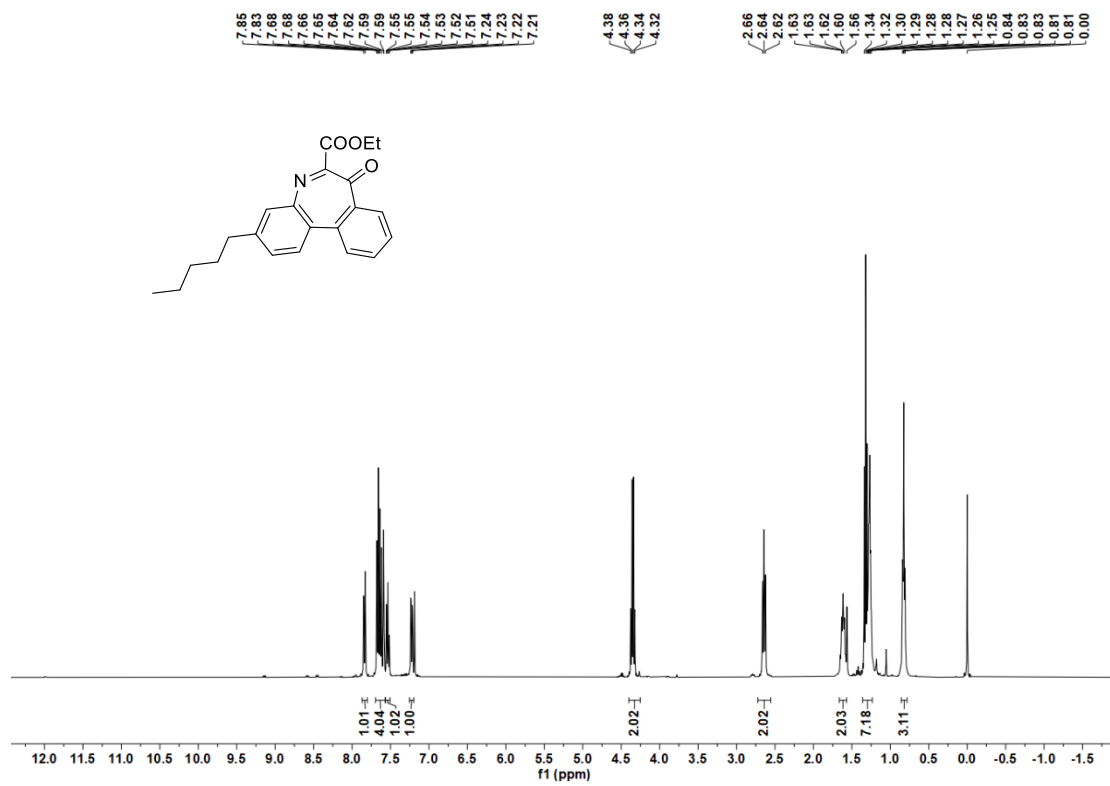

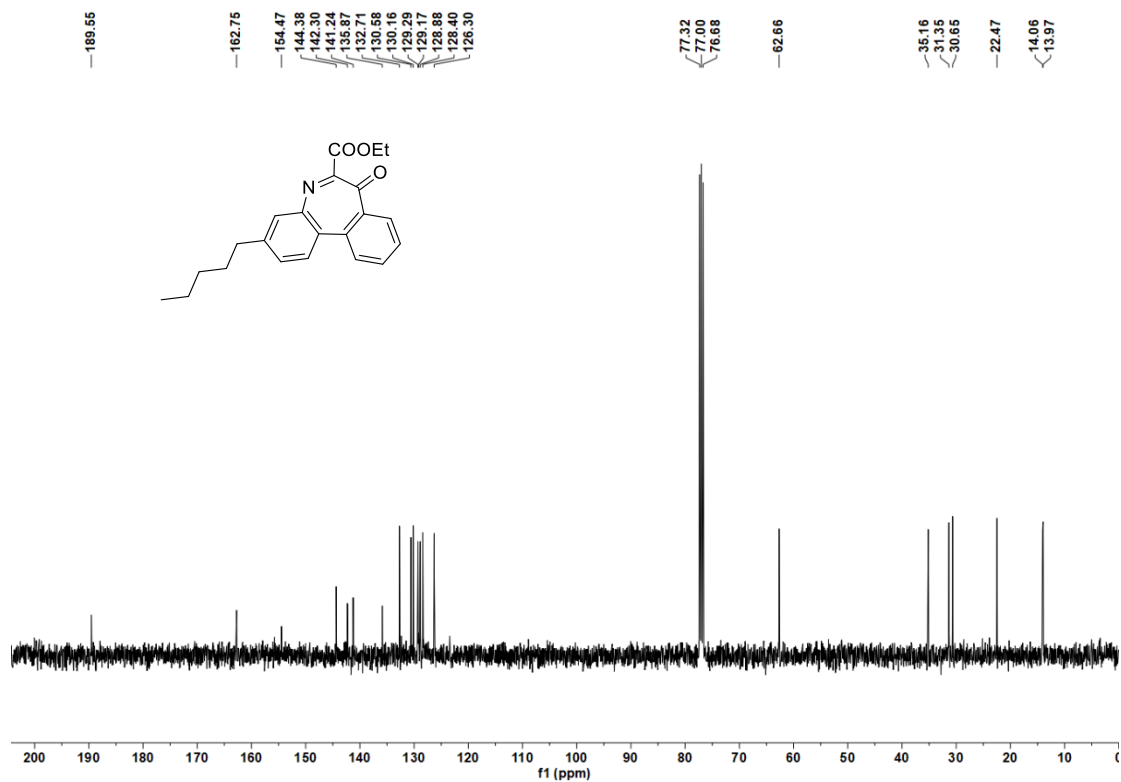

$^1\text{H-NMR}$  (400 MHz,  $\text{CDCl}_3$ ),  $^{13}\text{C}$  NMR (101 MHz,  $\text{CDCl}_3$ ) of **35**

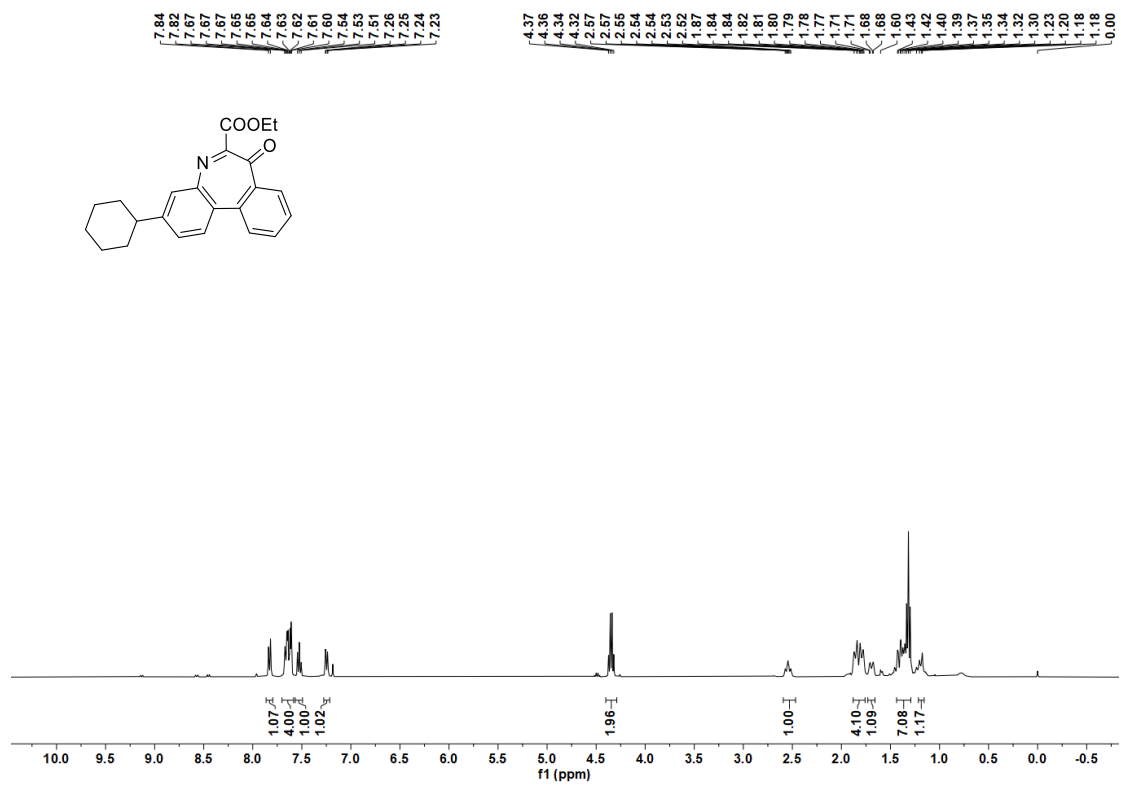

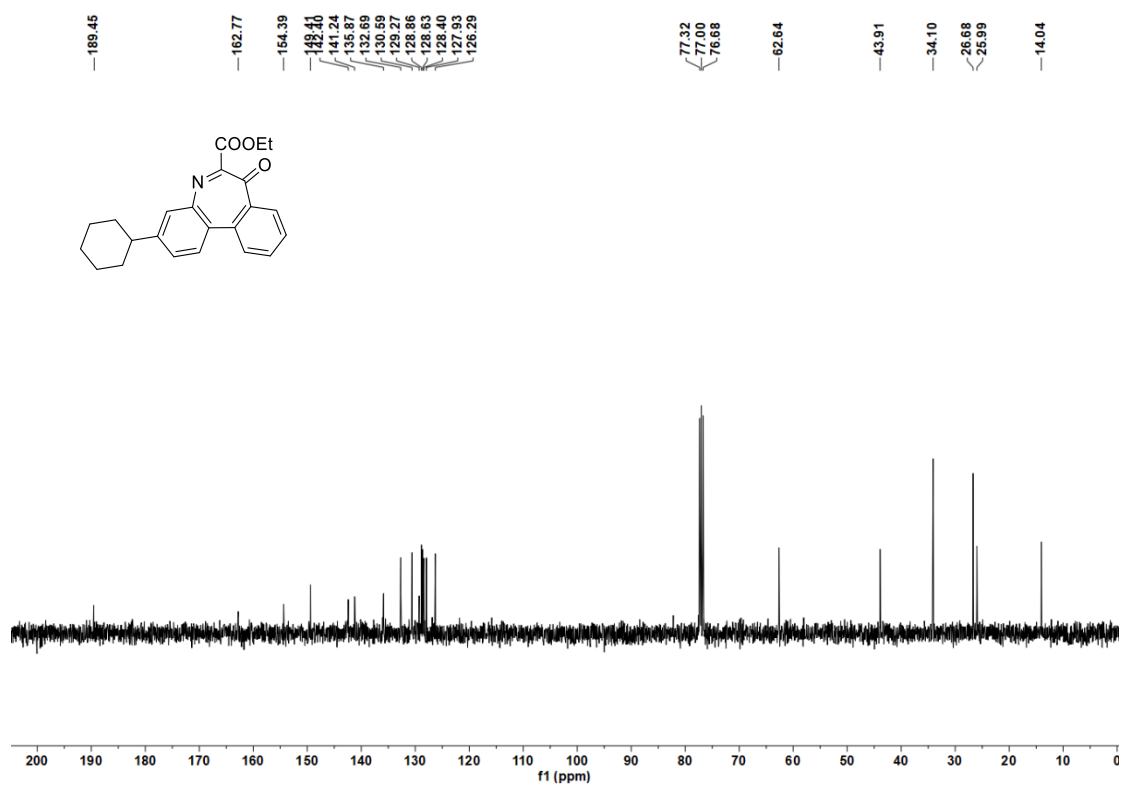

<sup>1</sup>H-NMR (400 MHz, CDCl<sub>3</sub>), <sup>13</sup>C NMR (101 MHz, CDCl<sub>3</sub>) of **36**

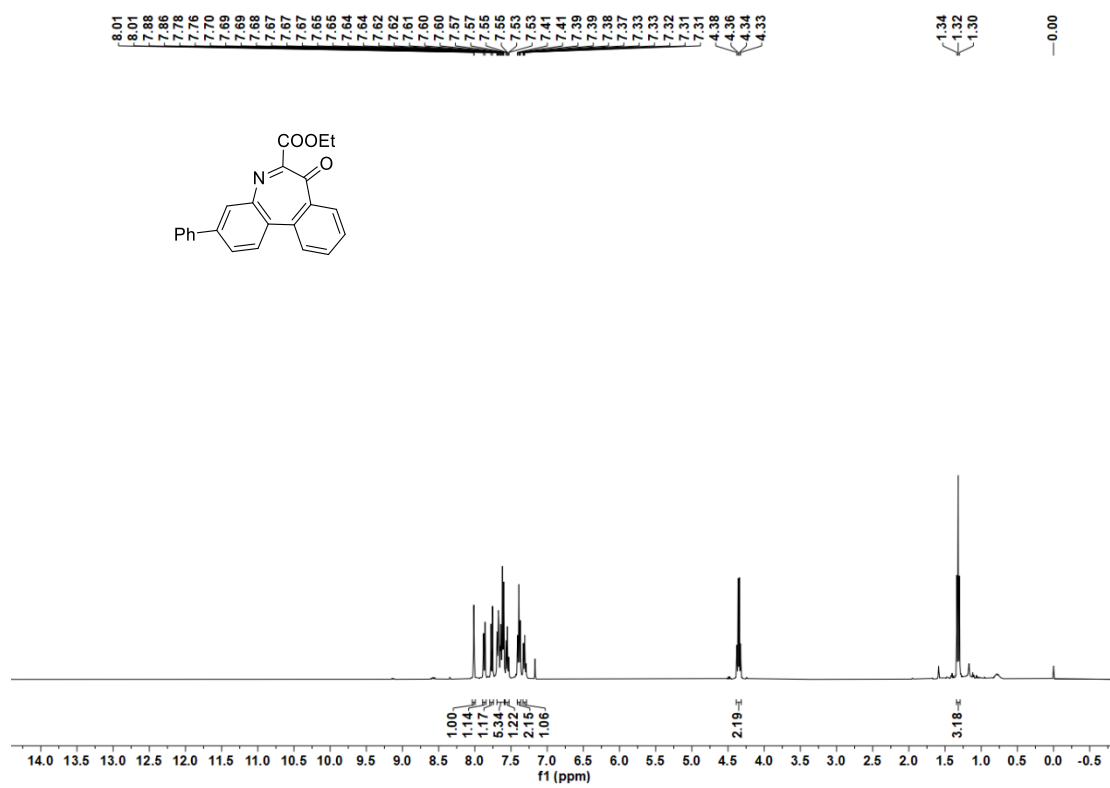

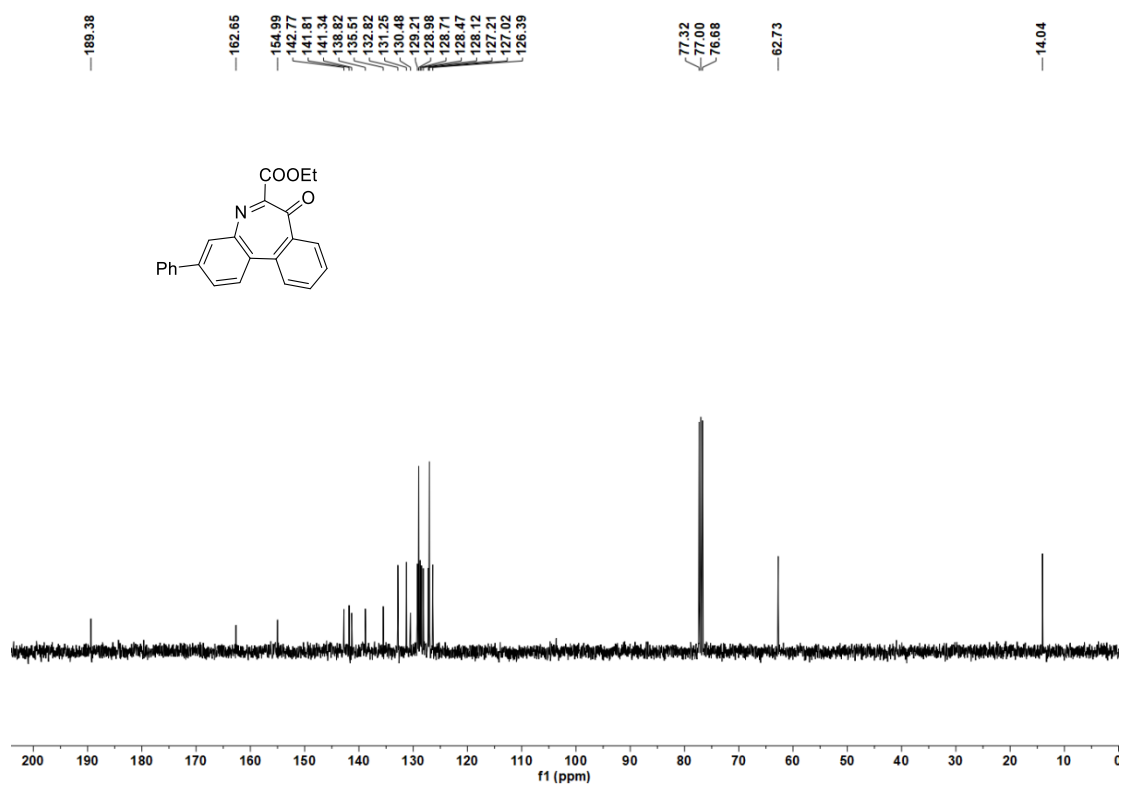

$^1\text{H-NMR}$  (400 MHz,  $\text{CDCl}_3$ ),  $^{13}\text{C}$  NMR (101 MHz,  $\text{CDCl}_3$ ) of **37**

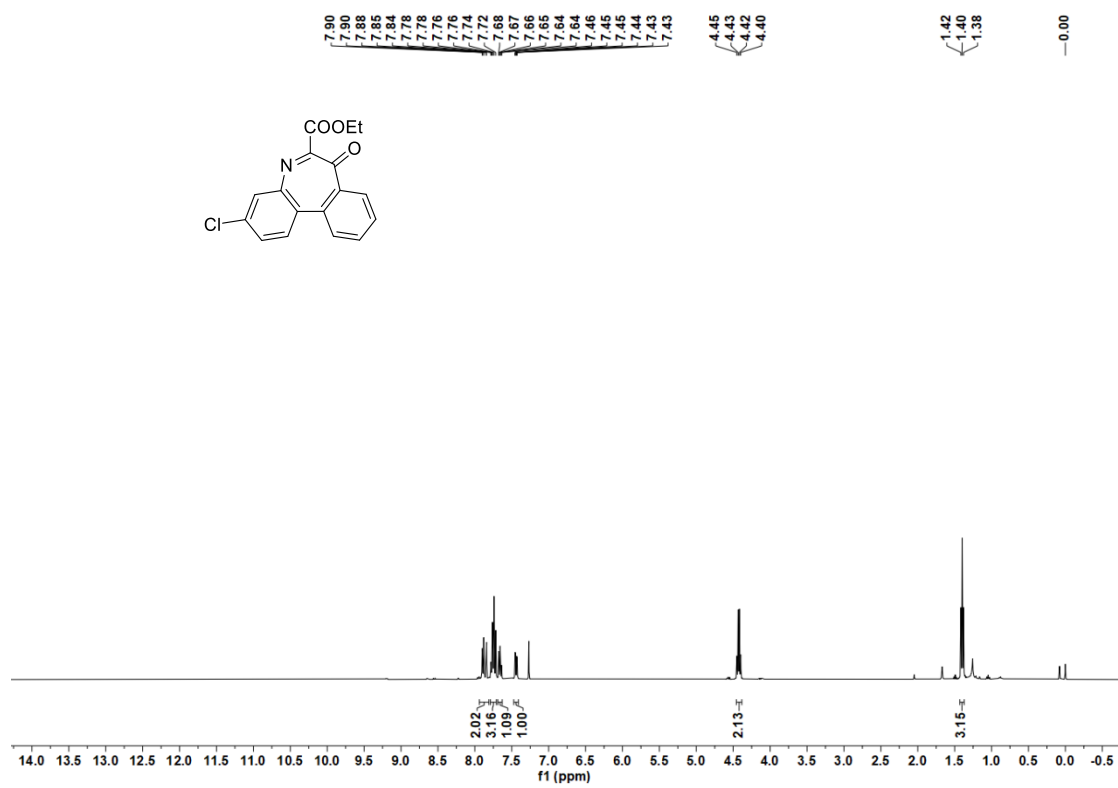

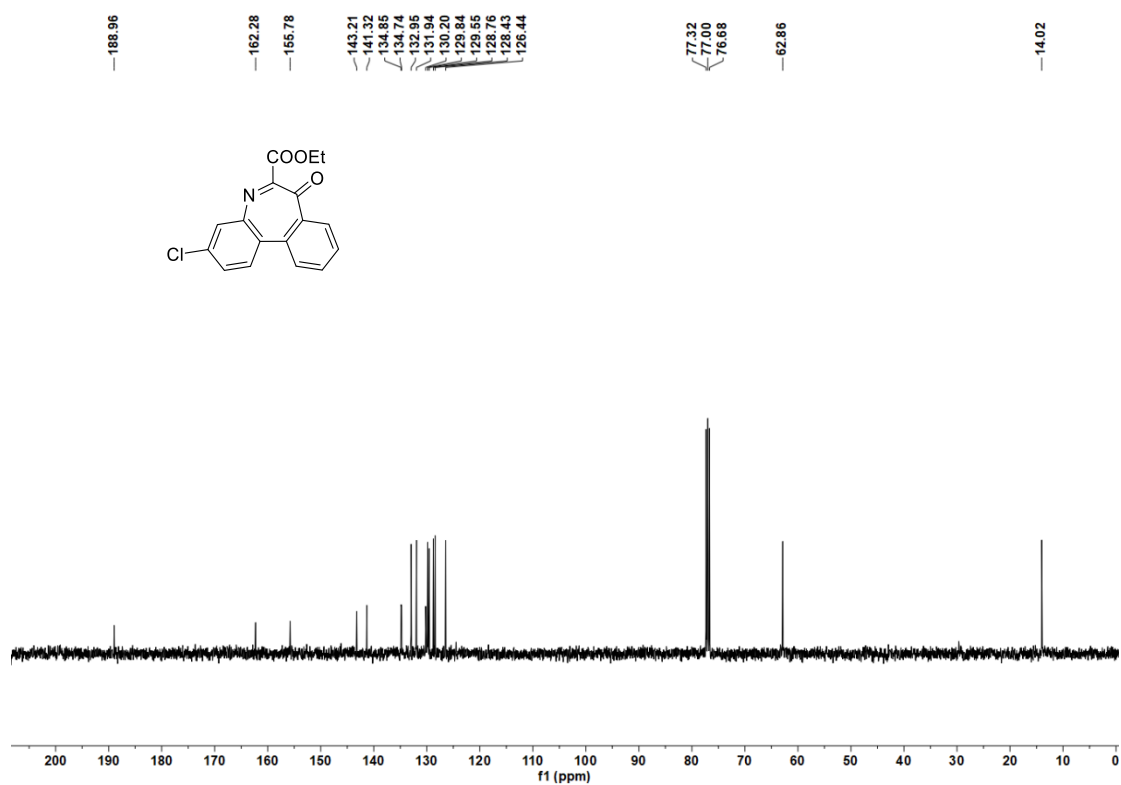

$^1\text{H}$ -NMR (400 MHz,  $\text{CDCl}_3$ ),  $^{13}\text{C}$  NMR (101 MHz,  $\text{CDCl}_3$ ) of **38**

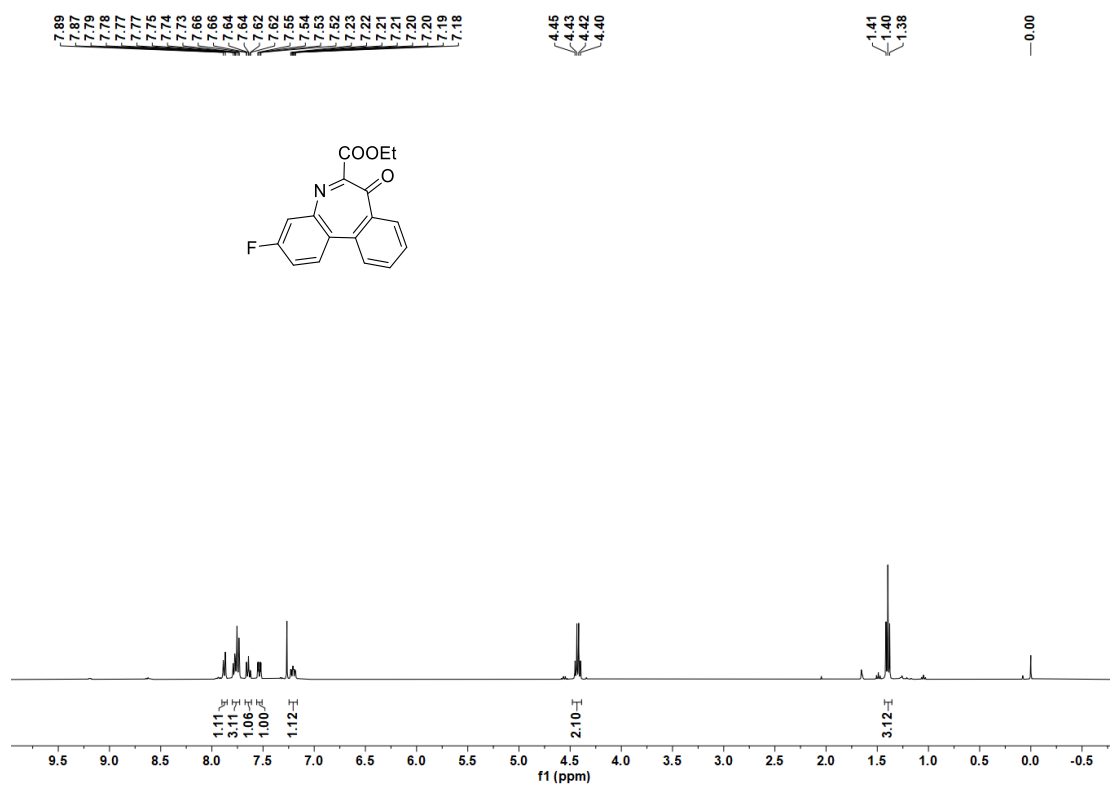



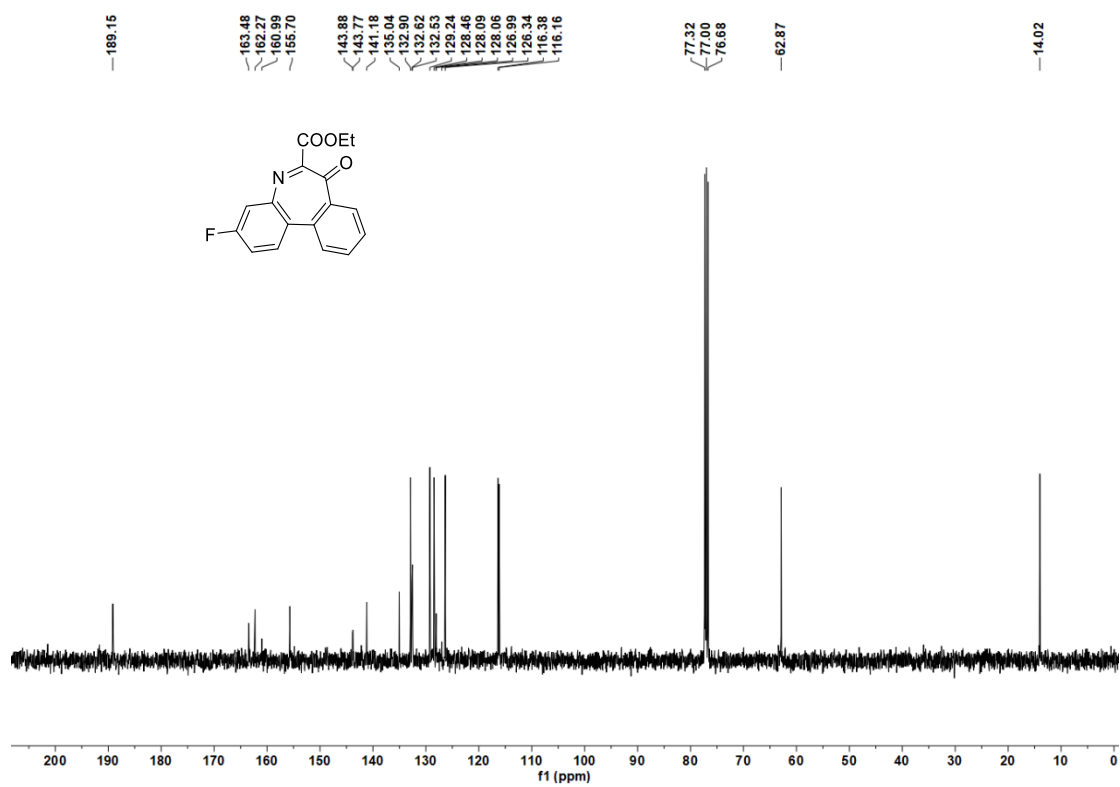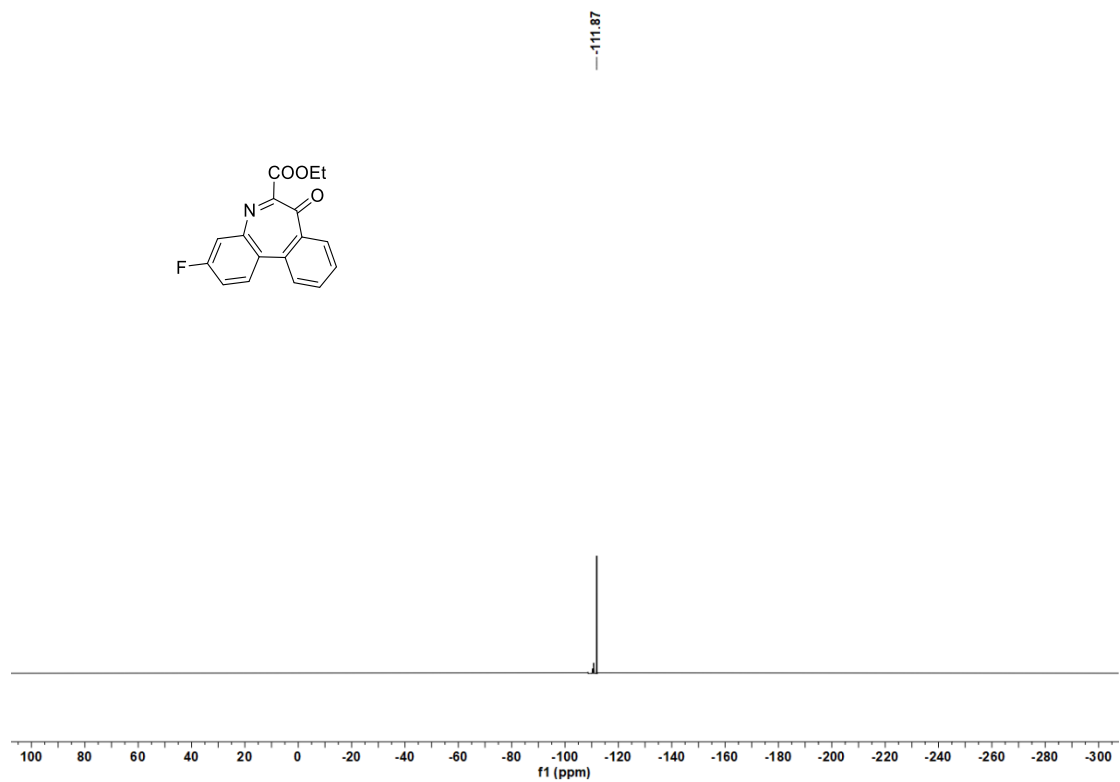

$^1\text{H}$ -NMR (400 MHz,  $\text{CDCl}_3$ ),  $^{13}\text{C}$  NMR (101 MHz,  $\text{CDCl}_3$ ),  $^{19}\text{F}$ -NMR (376 MHz,  $\text{CDCl}_3$ ) of **39**

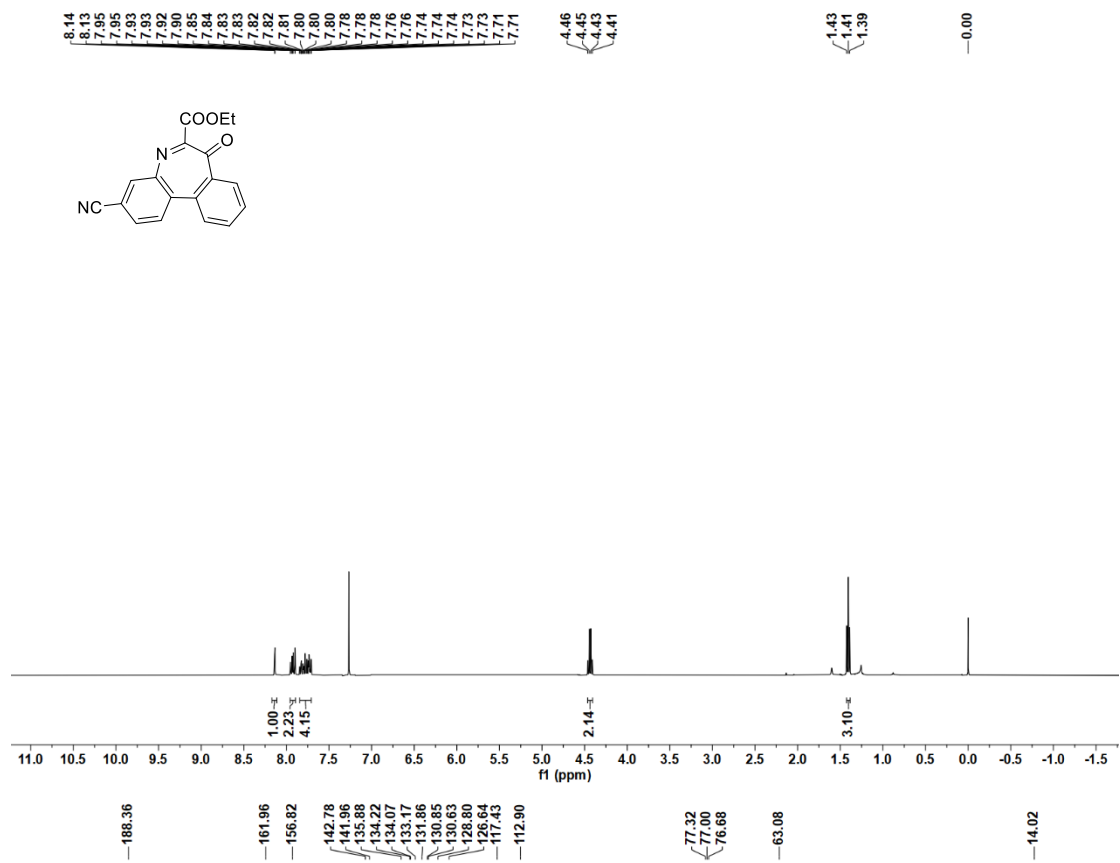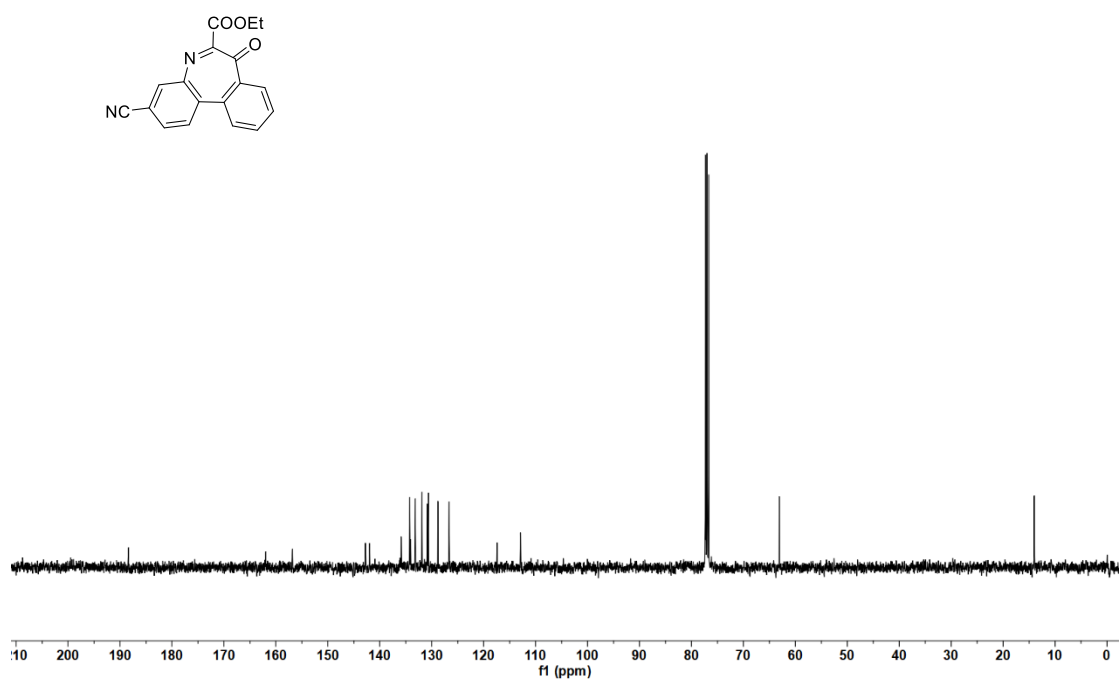

$^1\text{H-NMR}$  (400 MHz,  $\text{CDCl}_3$ ),  $^{13}\text{C-NMR}$  (101 MHz,  $\text{CDCl}_3$ ) of **40**

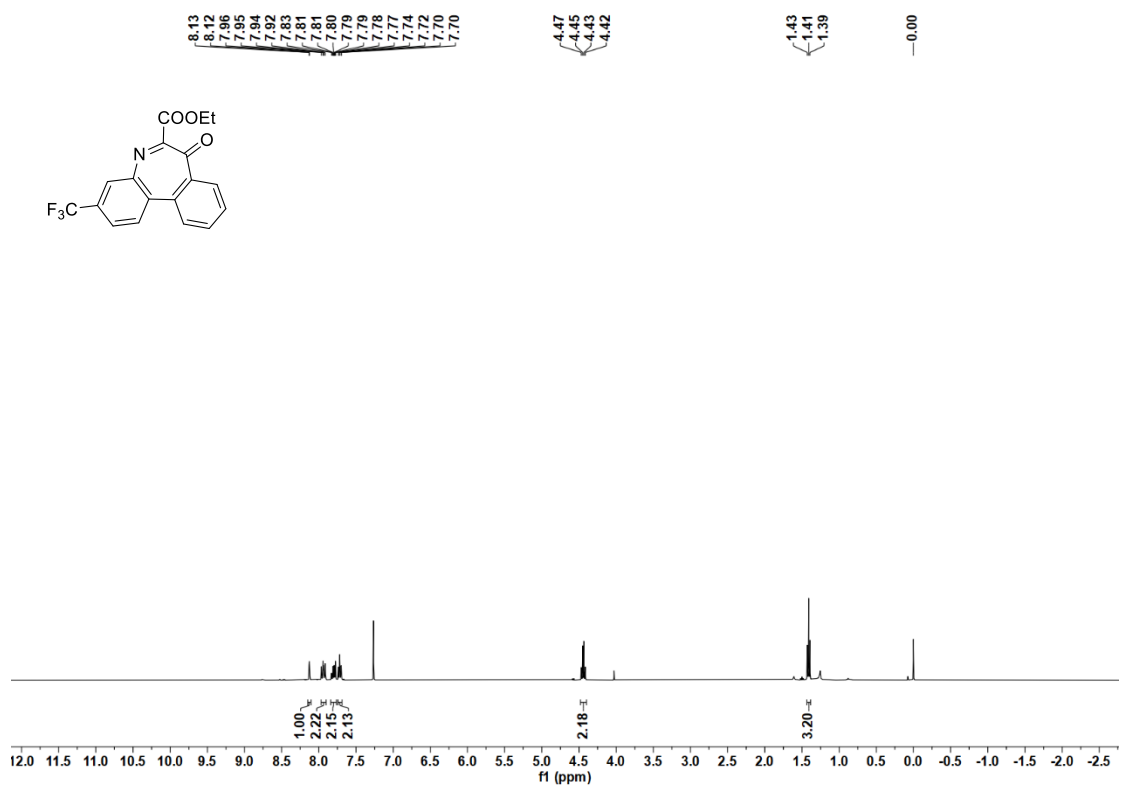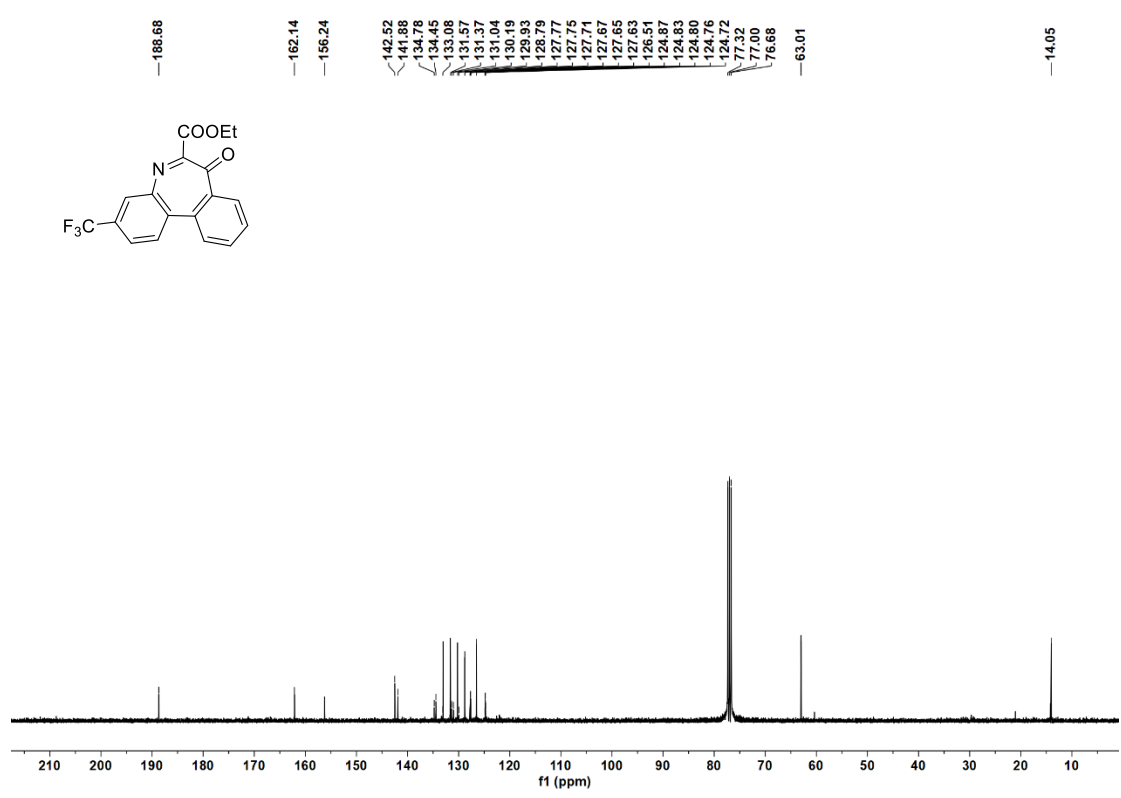

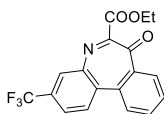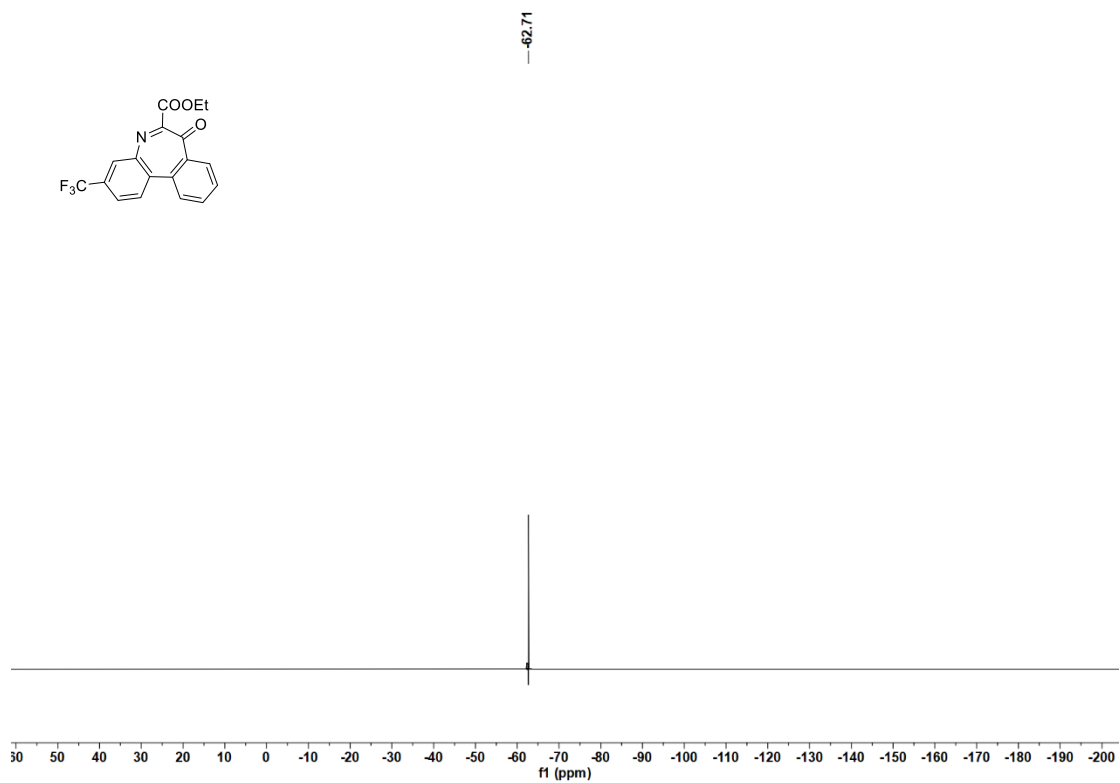

**<sup>1</sup>H-NMR** (400 MHz, CDCl<sub>3</sub>), **<sup>13</sup>C NMR** (101 MHz, CDCl<sub>3</sub>), **<sup>19</sup>F-NMR** (376 MHz, CDCl<sub>3</sub>)  
of **41**

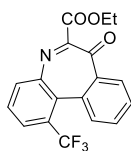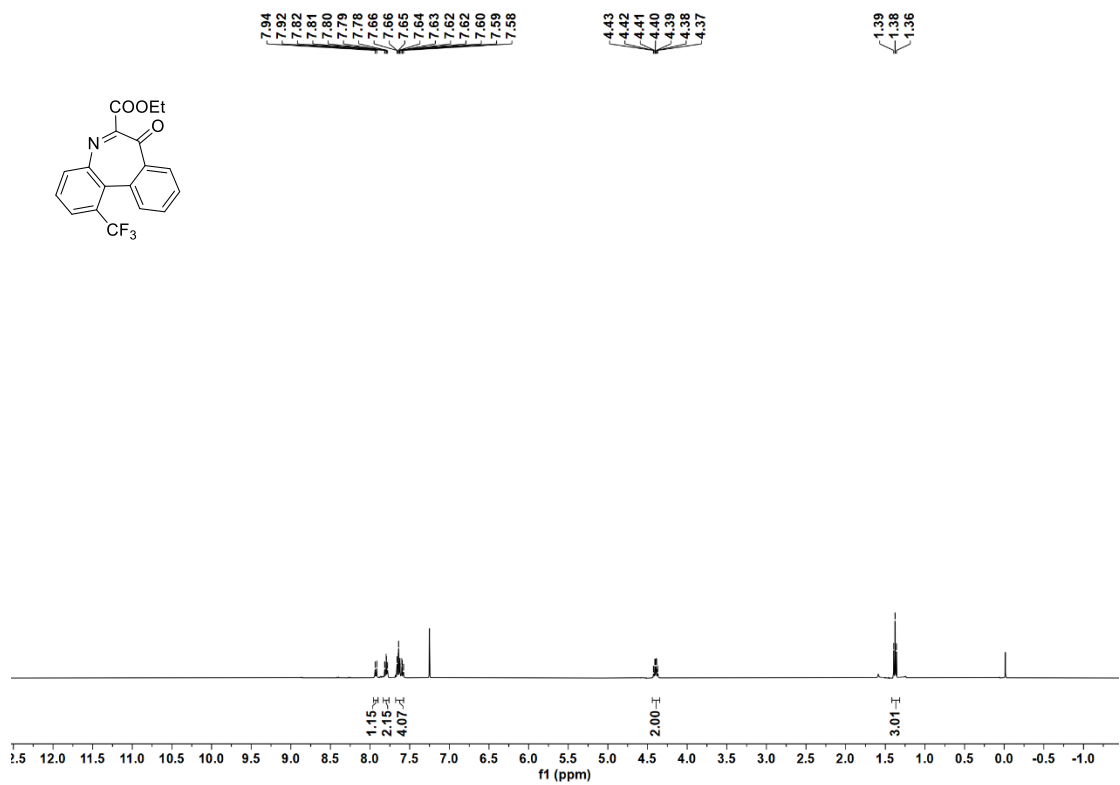

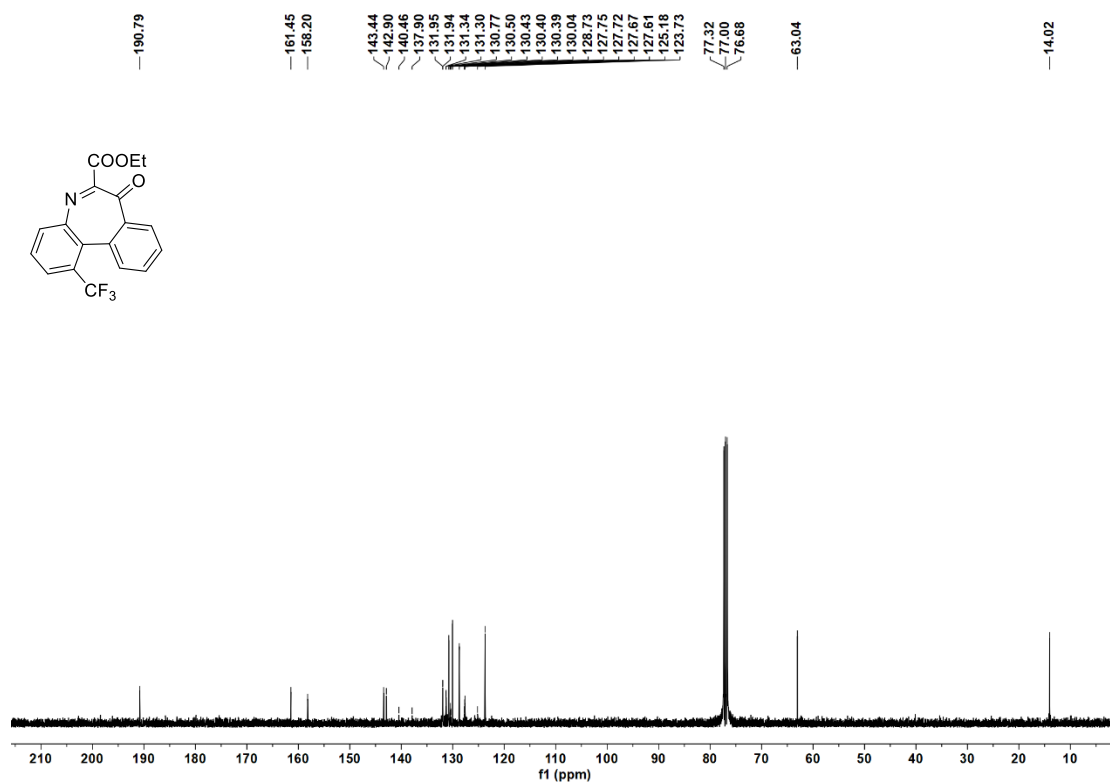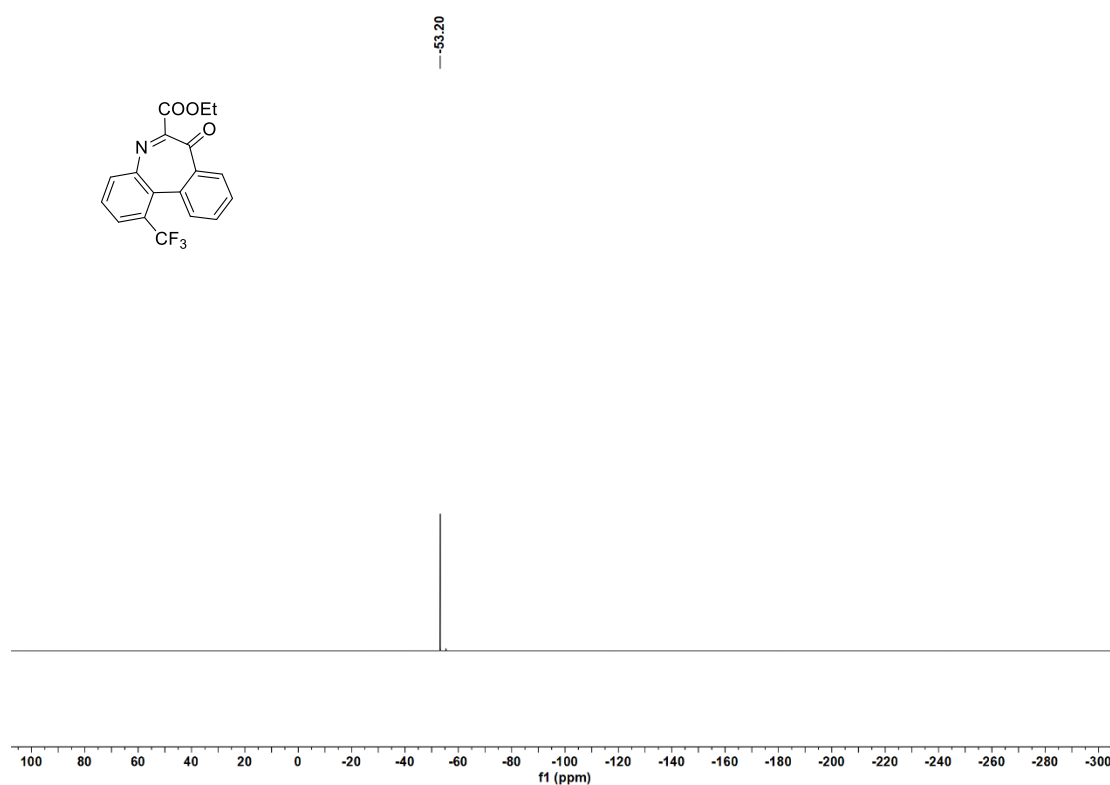

**<sup>1</sup>H-NMR** (400 MHz, CDCl<sub>3</sub>), **<sup>13</sup>C NMR** (101 MHz, CDCl<sub>3</sub>), **<sup>19</sup>F-NMR** (376 MHz, CDCl<sub>3</sub>) of **42**

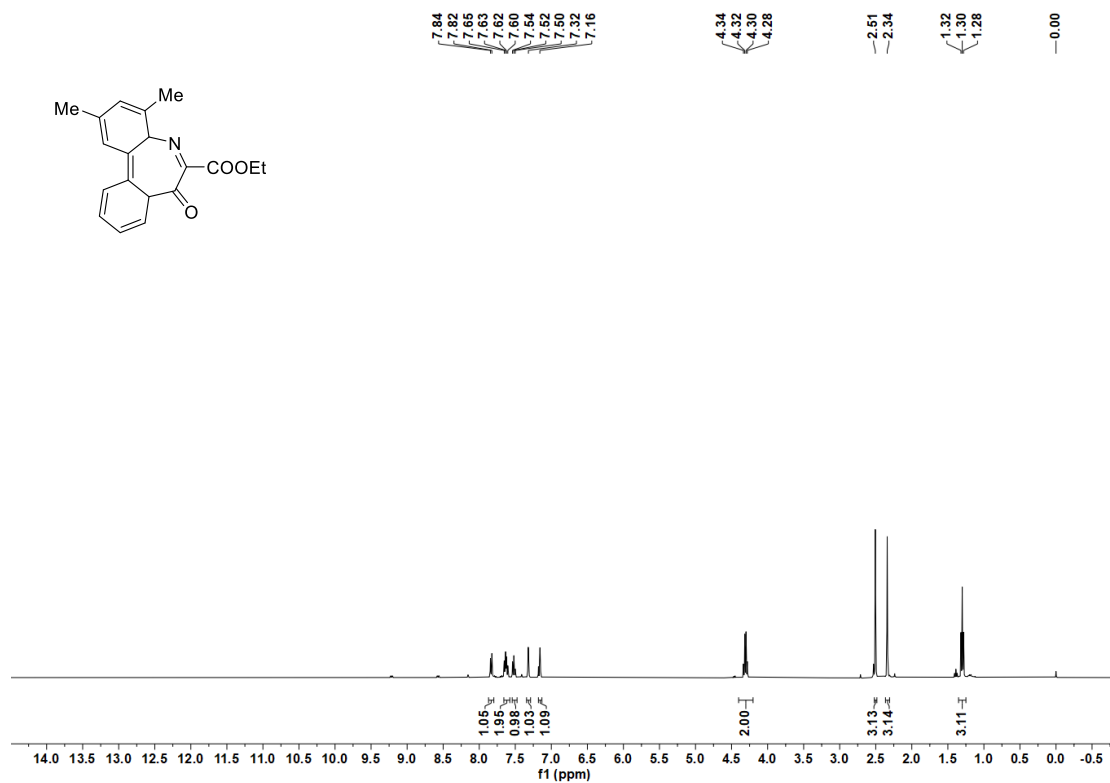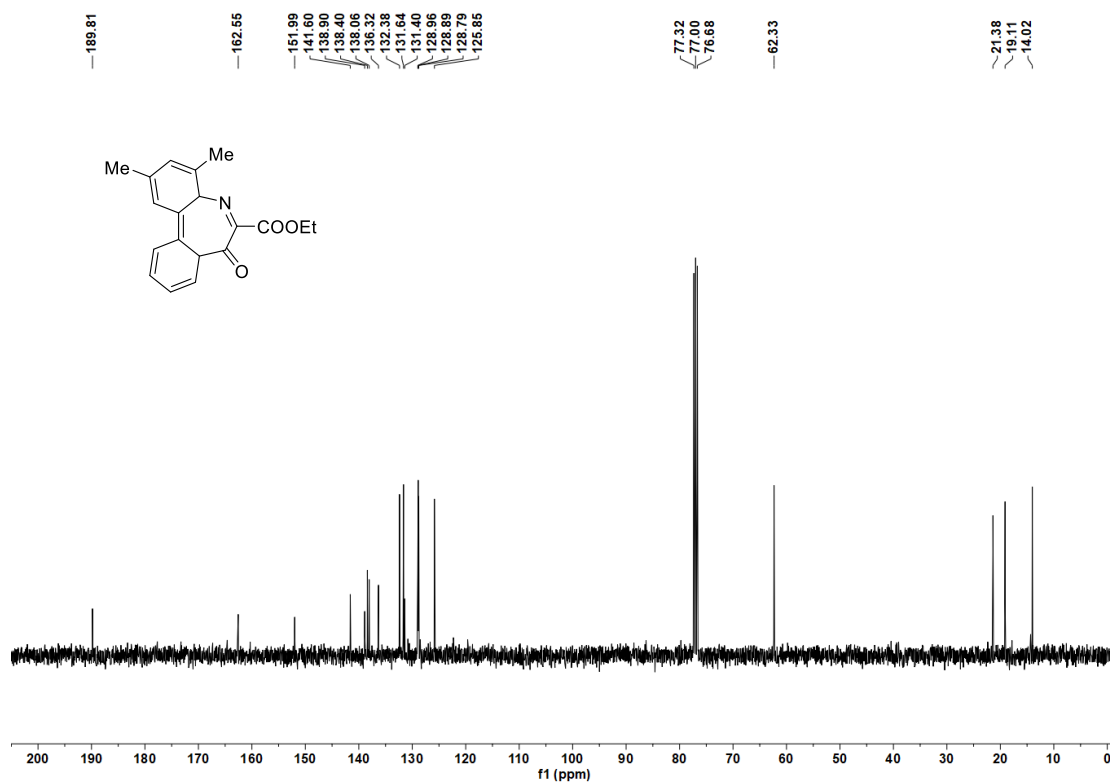

$^1\text{H-NMR}$  (400 MHz,  $\text{CDCl}_3$ ),  $^{13}\text{C-NMR}$  (101 MHz,  $\text{CDCl}_3$ ) of **43**

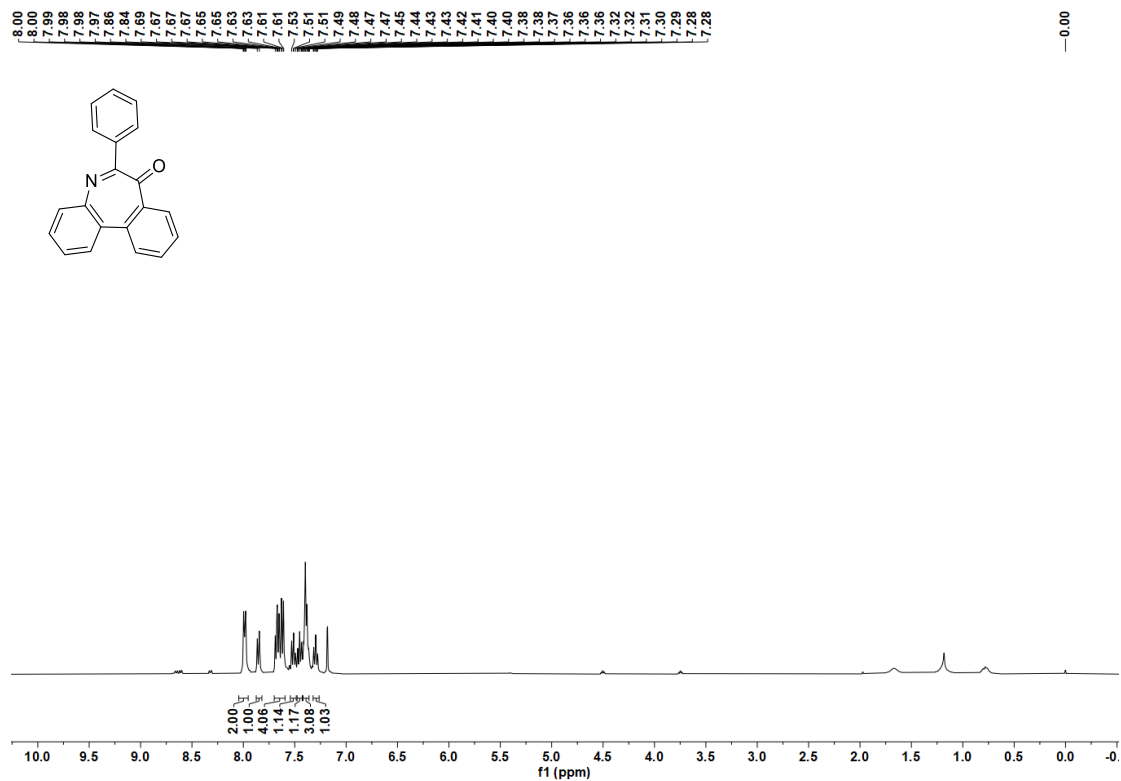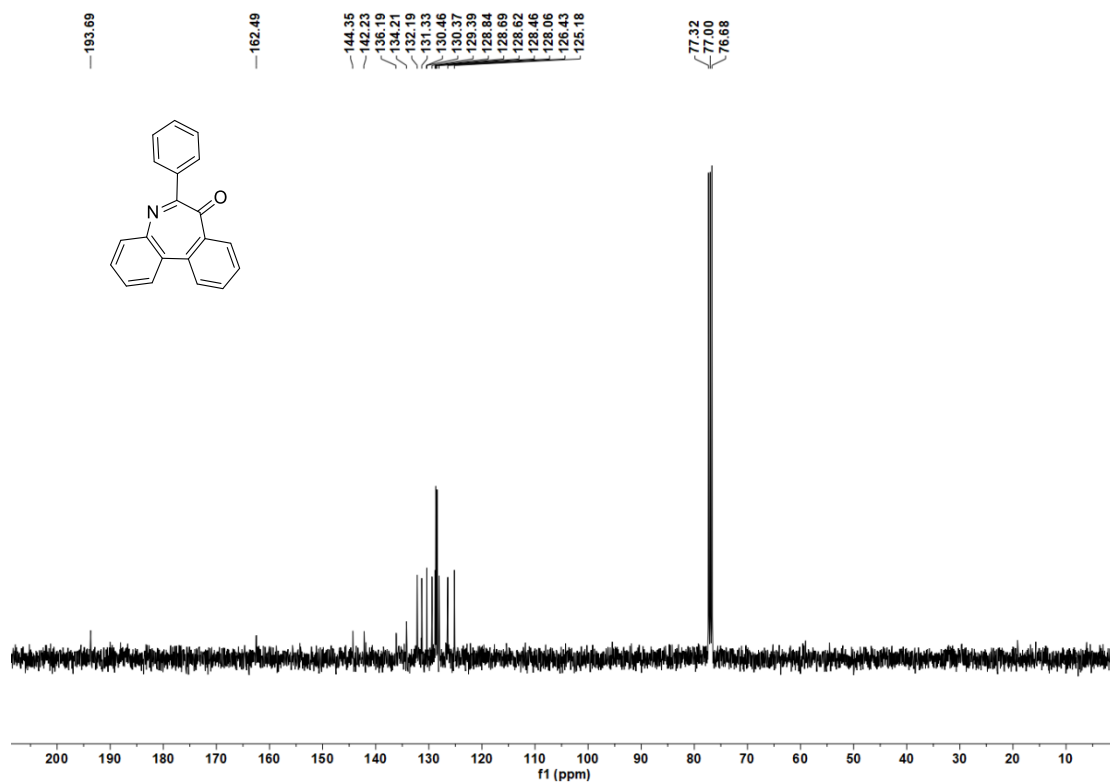

$^1\text{H-NMR}$  (400 MHz,  $\text{CDCl}_3$ ),  $^{13}\text{C-NMR}$  (101 MHz,  $\text{CDCl}_3$ ) of **44**

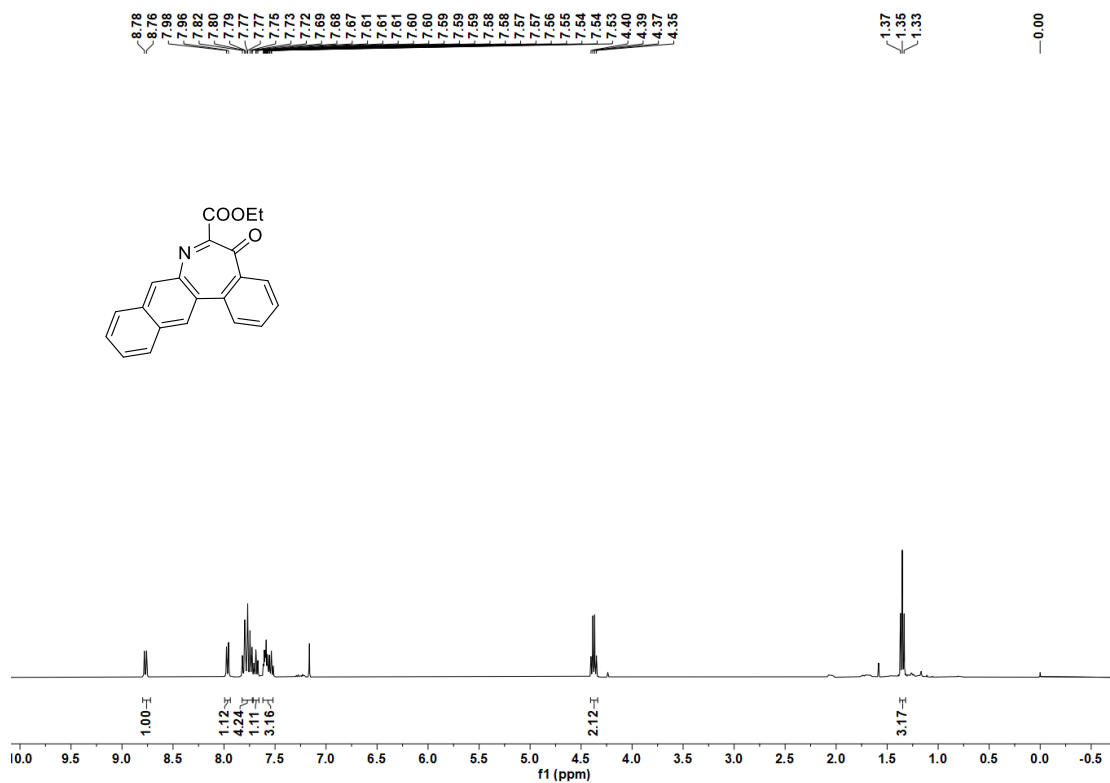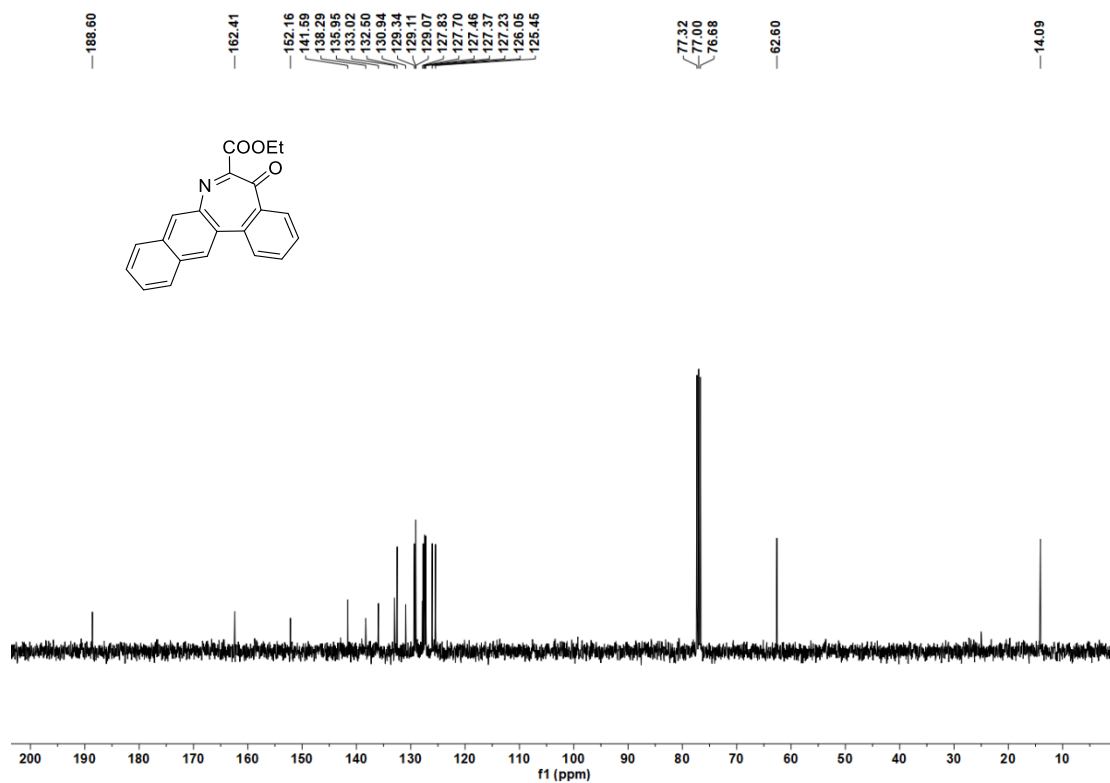

$^1\text{H-NMR}$  (400 MHz,  $\text{CDCl}_3$ ),  $^{13}\text{C-NMR}$  (101 MHz,  $\text{CDCl}_3$ ) of **45**



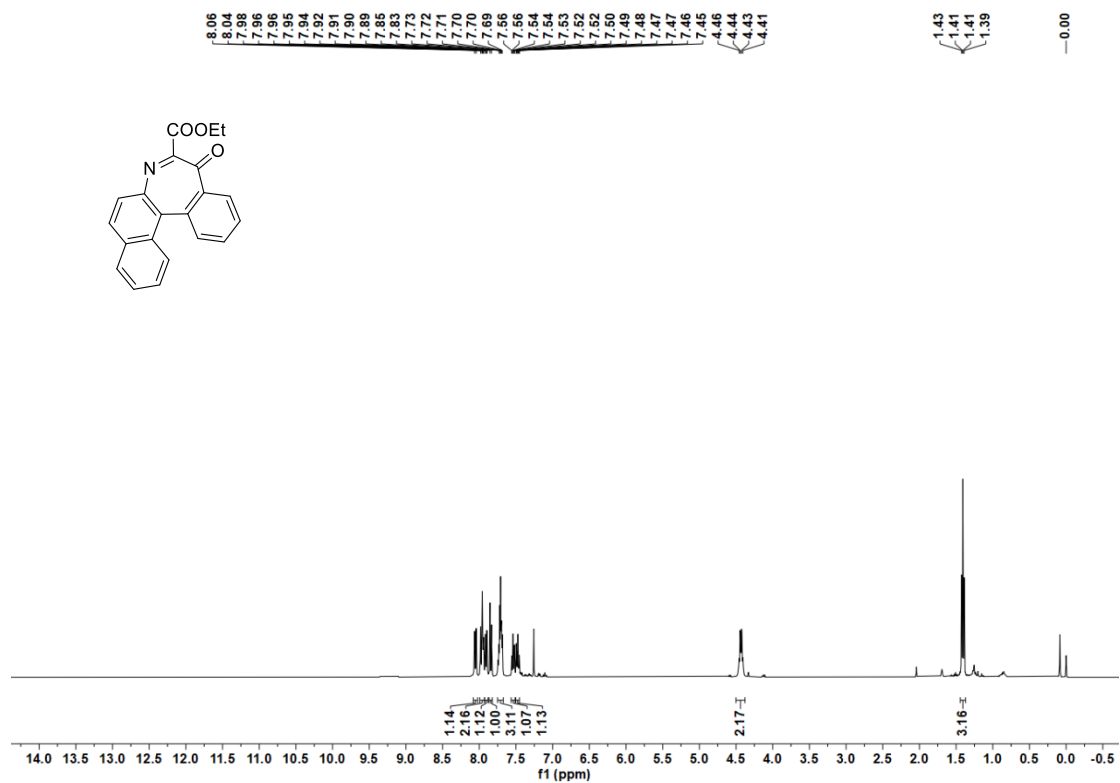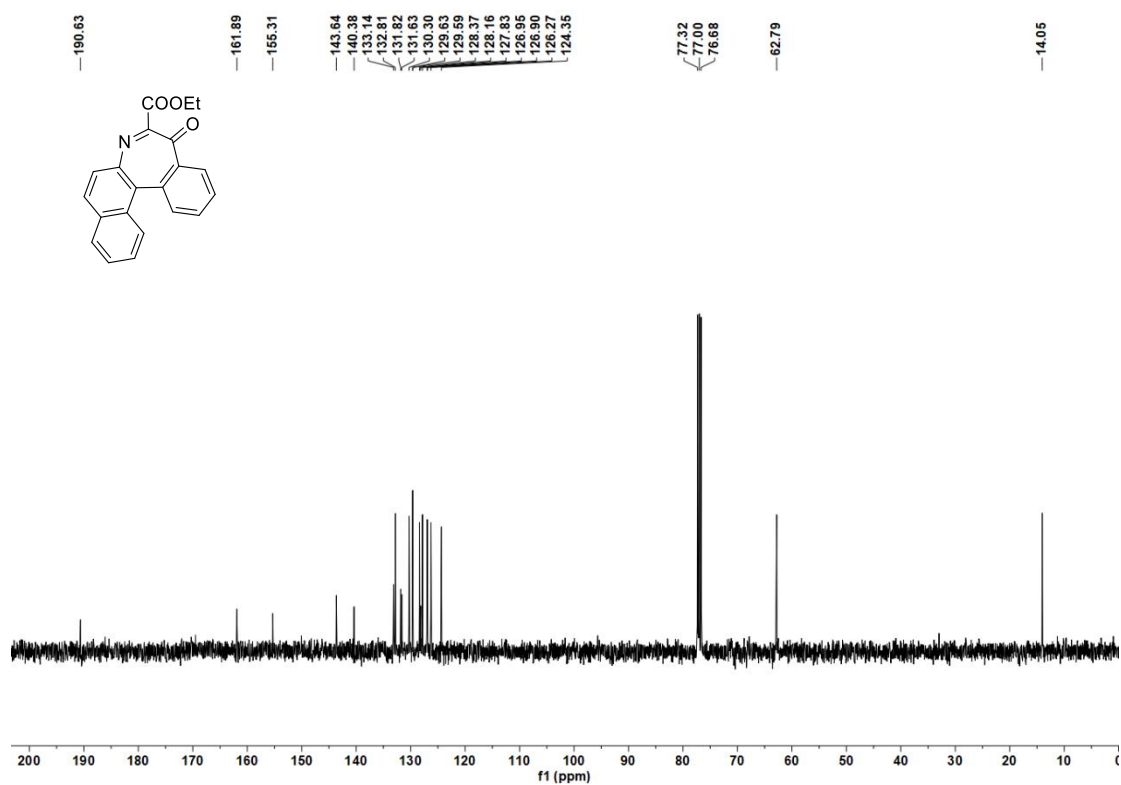

<sup>1</sup>H-NMR (400 MHz, CDCl<sub>3</sub>), <sup>13</sup>C NMR (101 MHz, CDCl<sub>3</sub>) of **46**

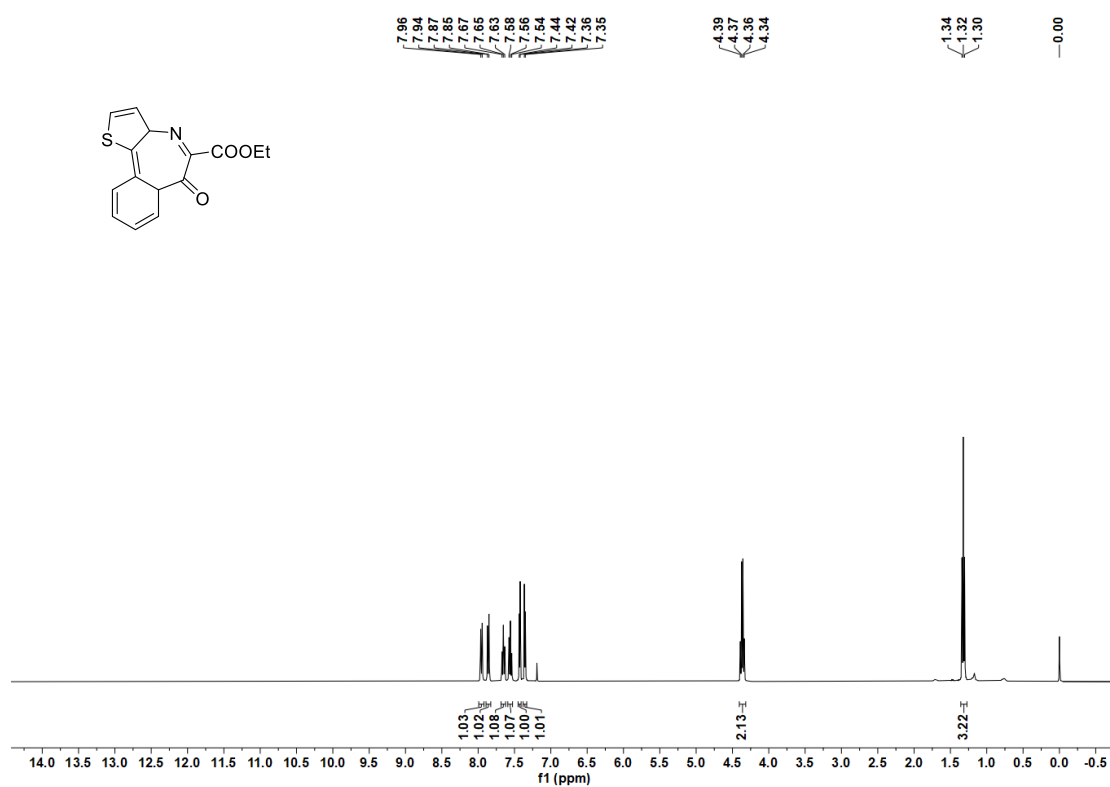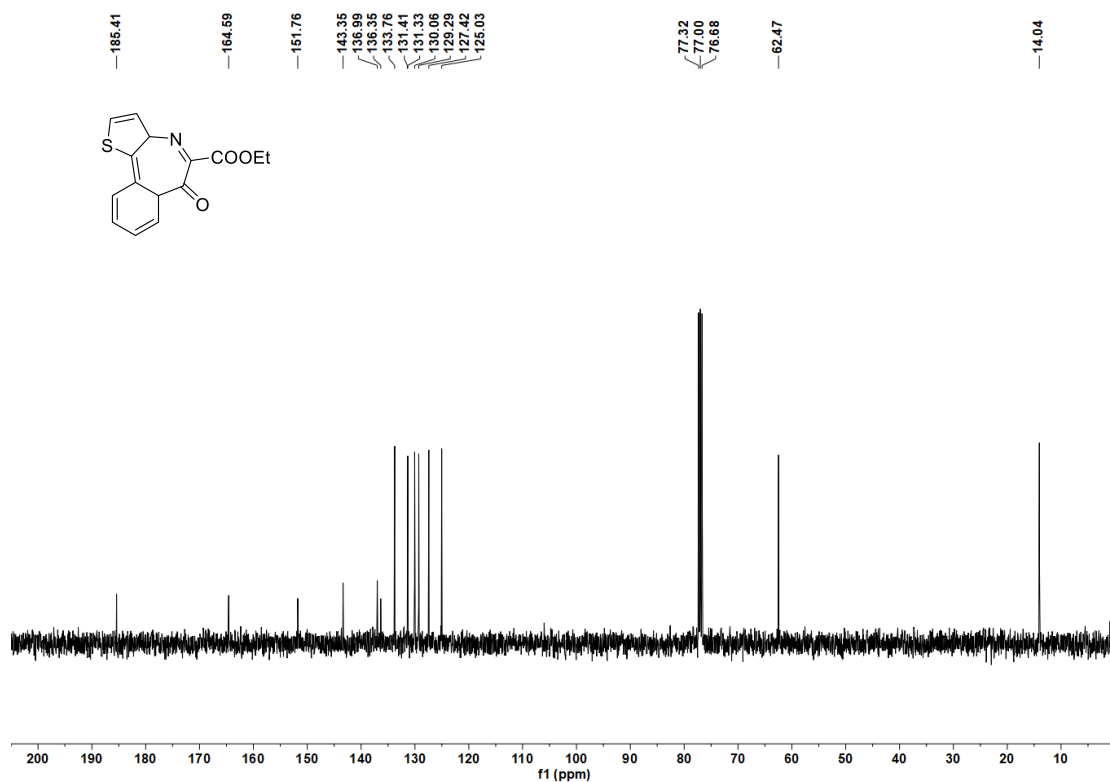

<sup>1</sup>H-NMR (400 MHz, CDCl<sub>3</sub>), <sup>13</sup>C NMR (101 MHz, CDCl<sub>3</sub>) of **47**

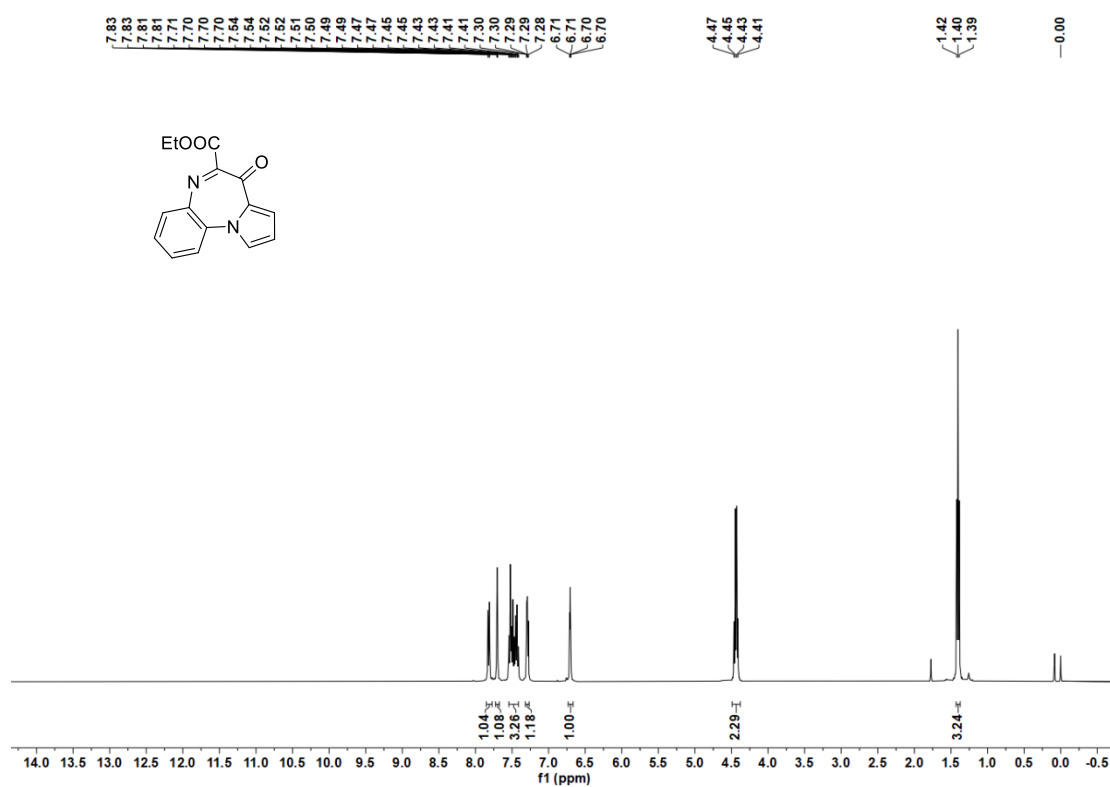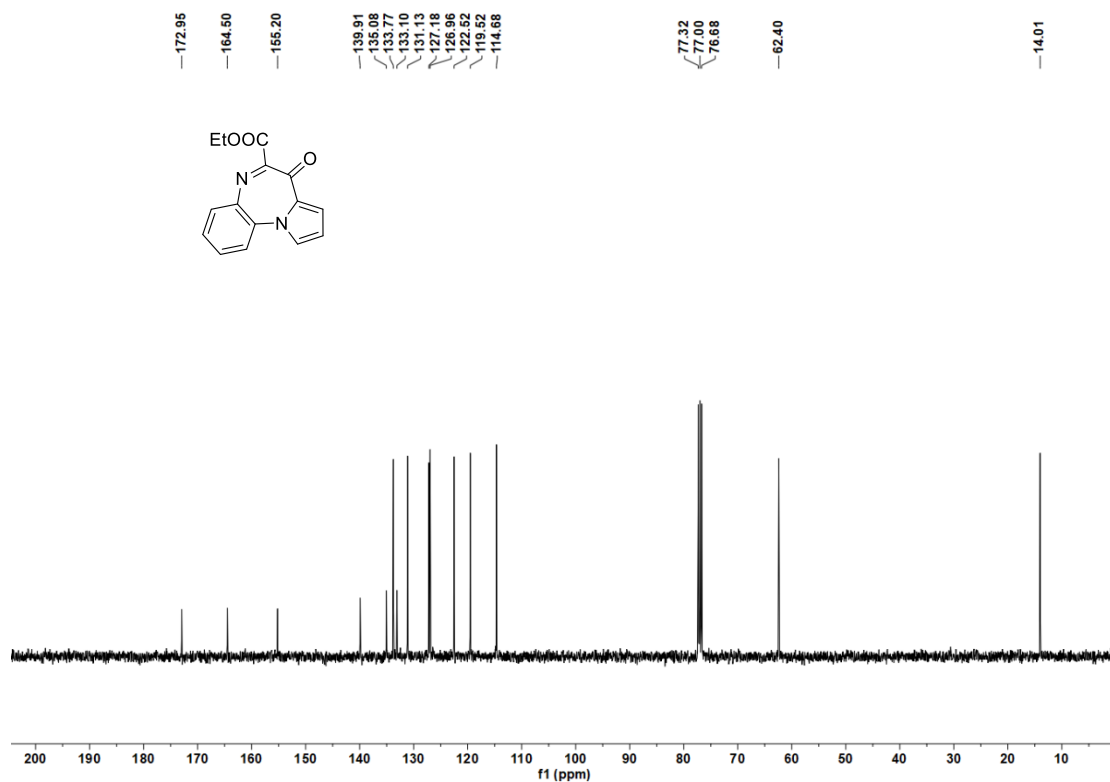

$^1\text{H-NMR}$  (400 MHz,  $\text{CDCl}_3$ ),  $^{13}\text{C-NMR}$  (101 MHz,  $\text{CDCl}_3$ ) of **48**

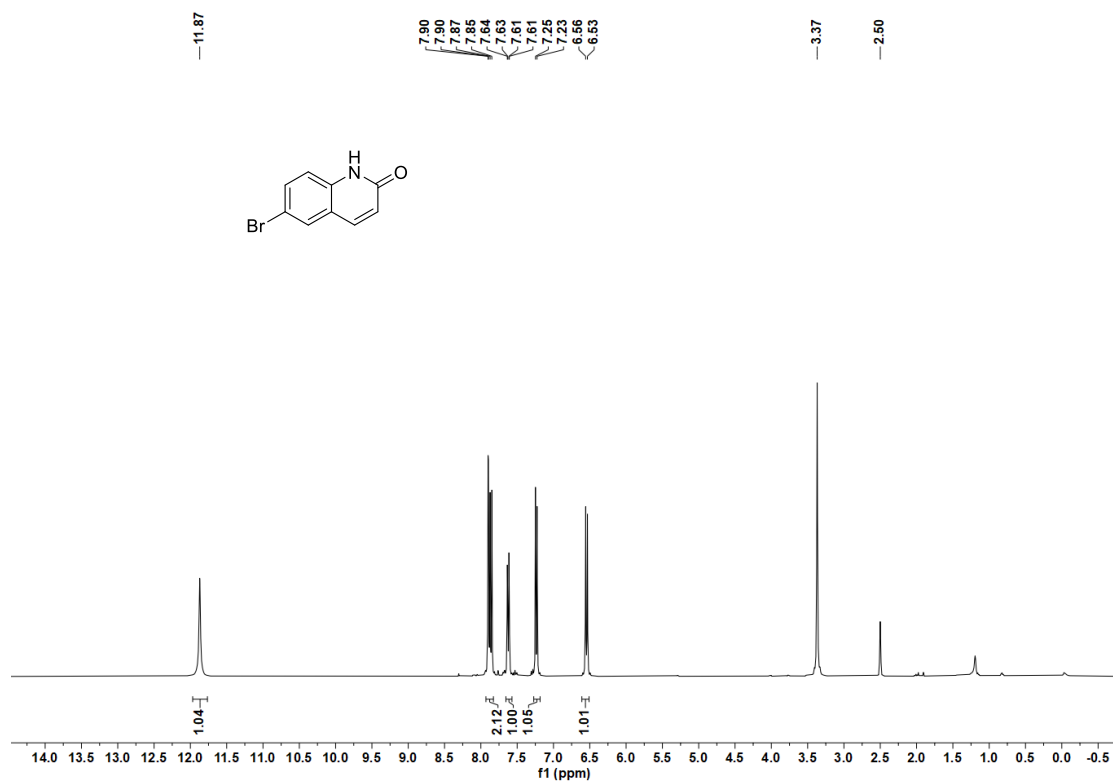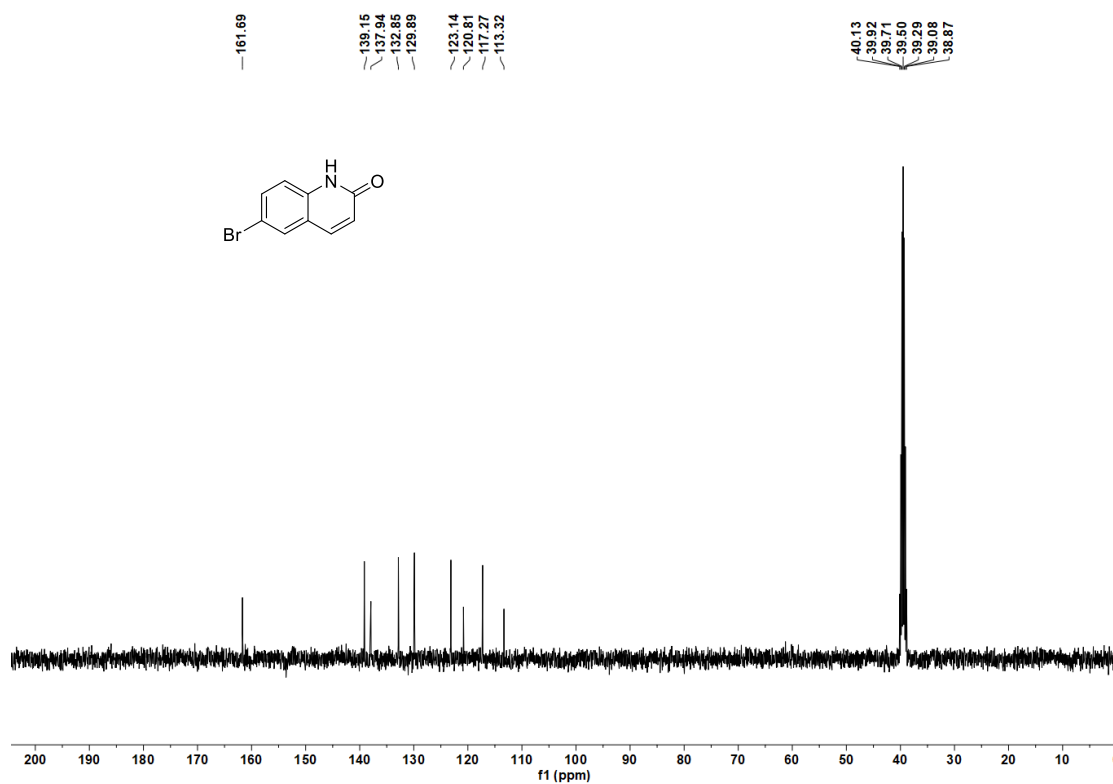

$^1\text{H-NMR}$  (400 MHz,  $\text{DMSO-}d_6$ ),  $^{13}\text{C-NMR}$  (101 MHz,  $\text{DMSO-}d_6$ ) of **49**

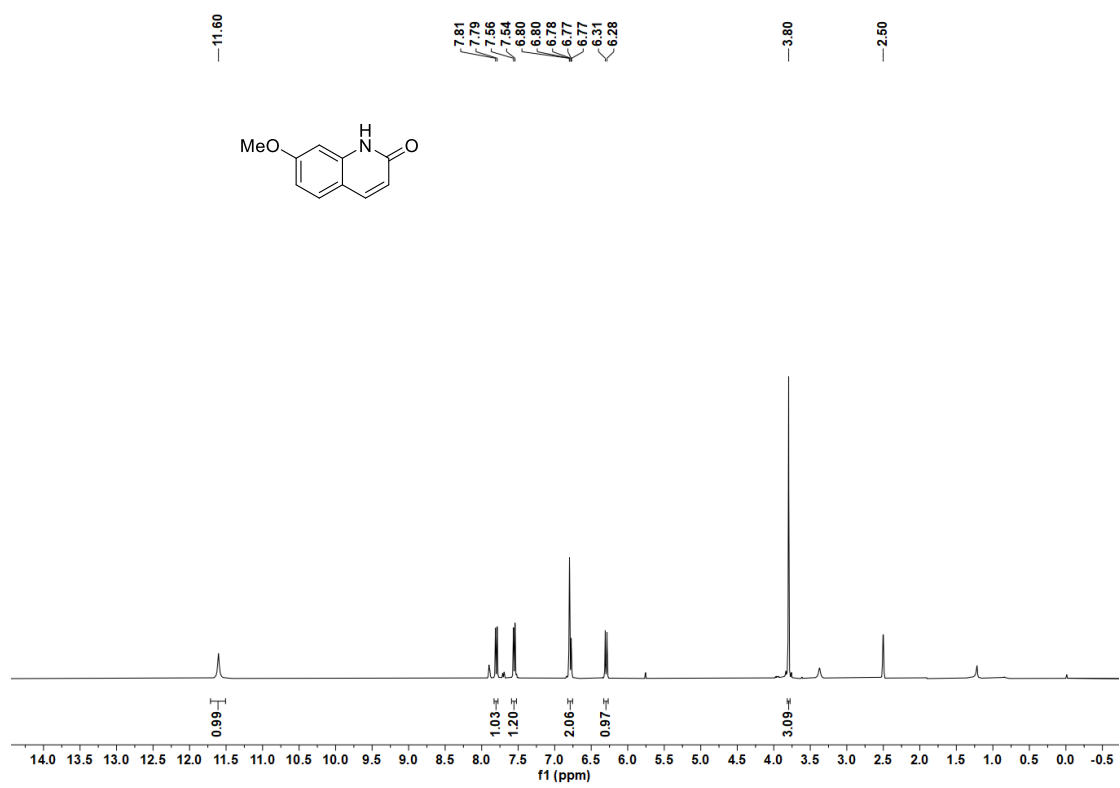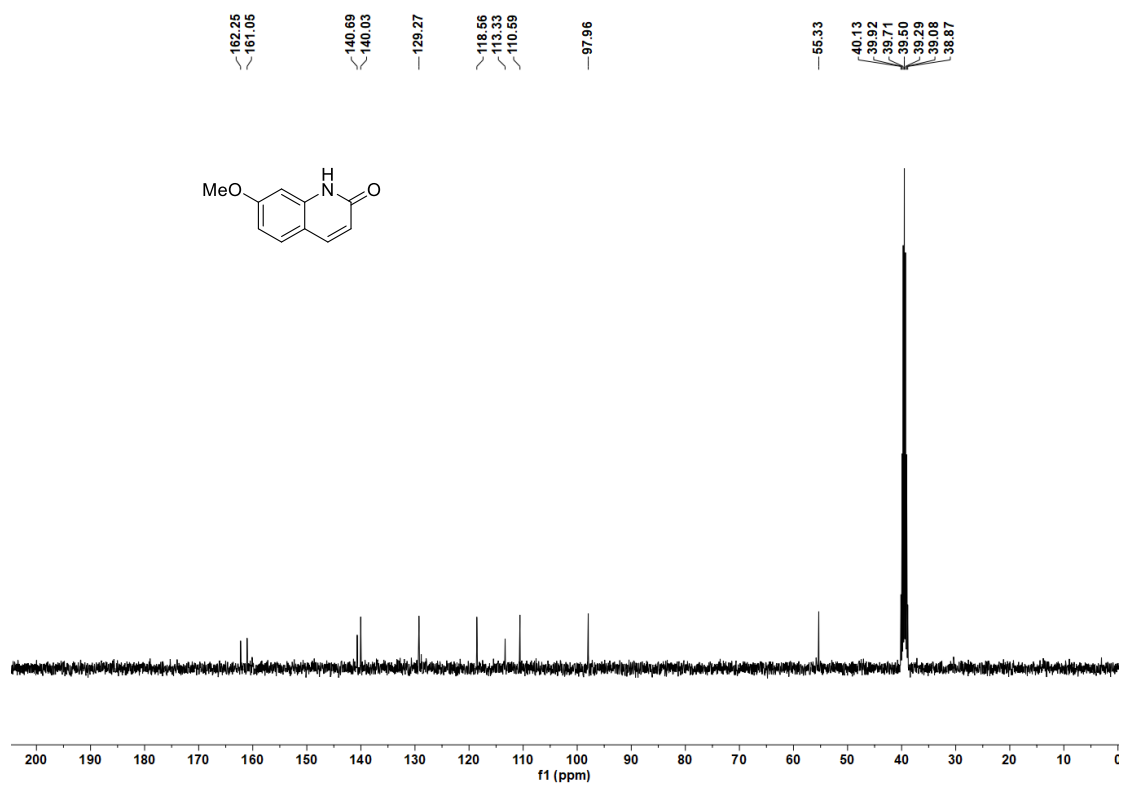

$^1\text{H-NMR}$  (400 MHz,  $\text{DMSO-}d_6$ ),  $^{13}\text{C-NMR}$  (101 MHz,  $\text{DMSO-}d_6$ ) of **50**

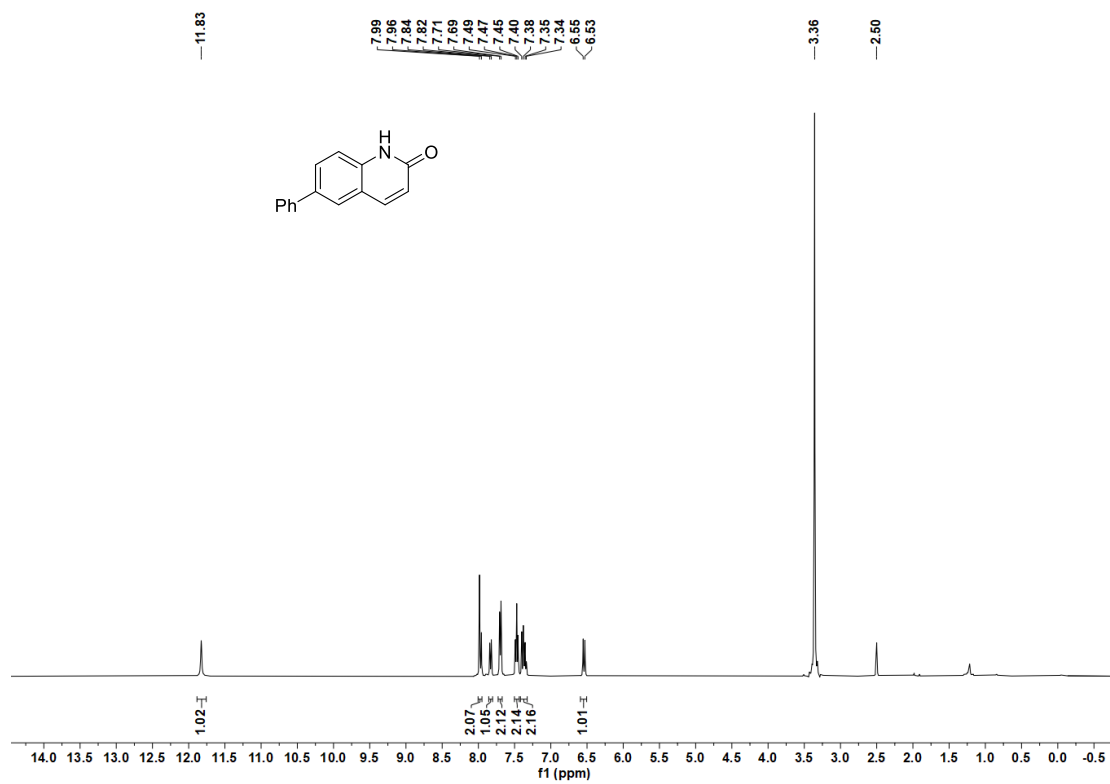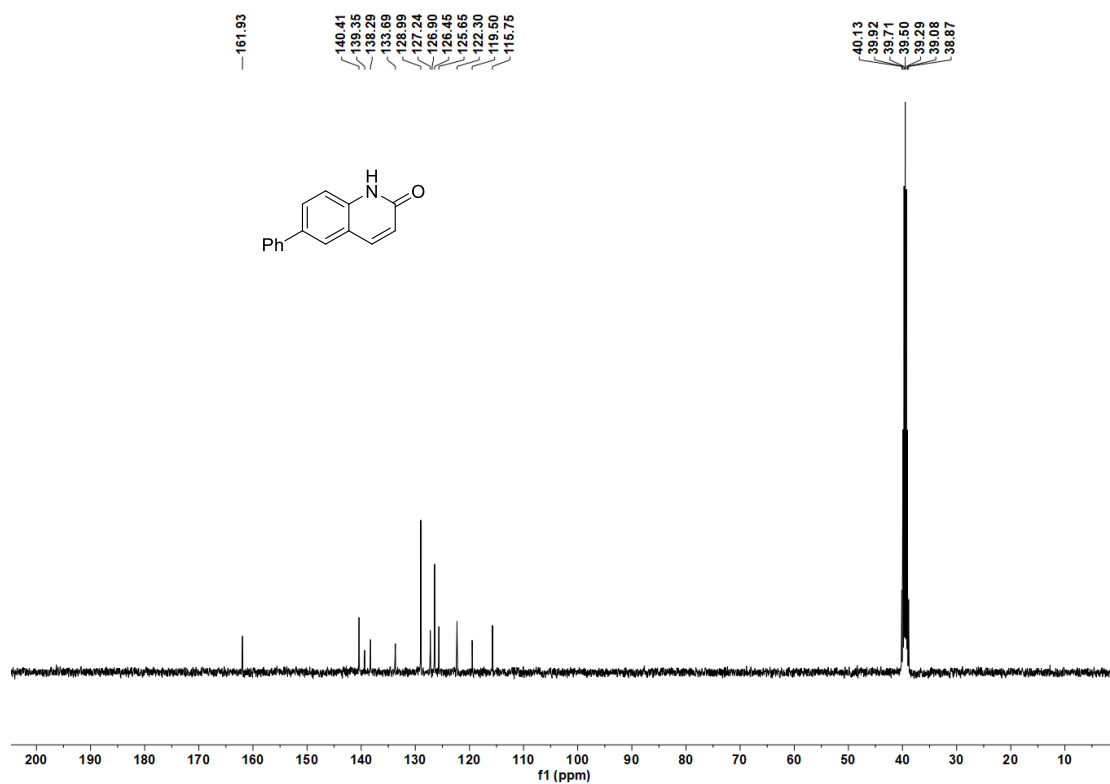

<sup>1</sup>H-NMR (400 MHz, DMSO-*d*<sub>6</sub>), <sup>13</sup>C NMR (101 MHz, DMSO-*d*<sub>6</sub>) of **51**

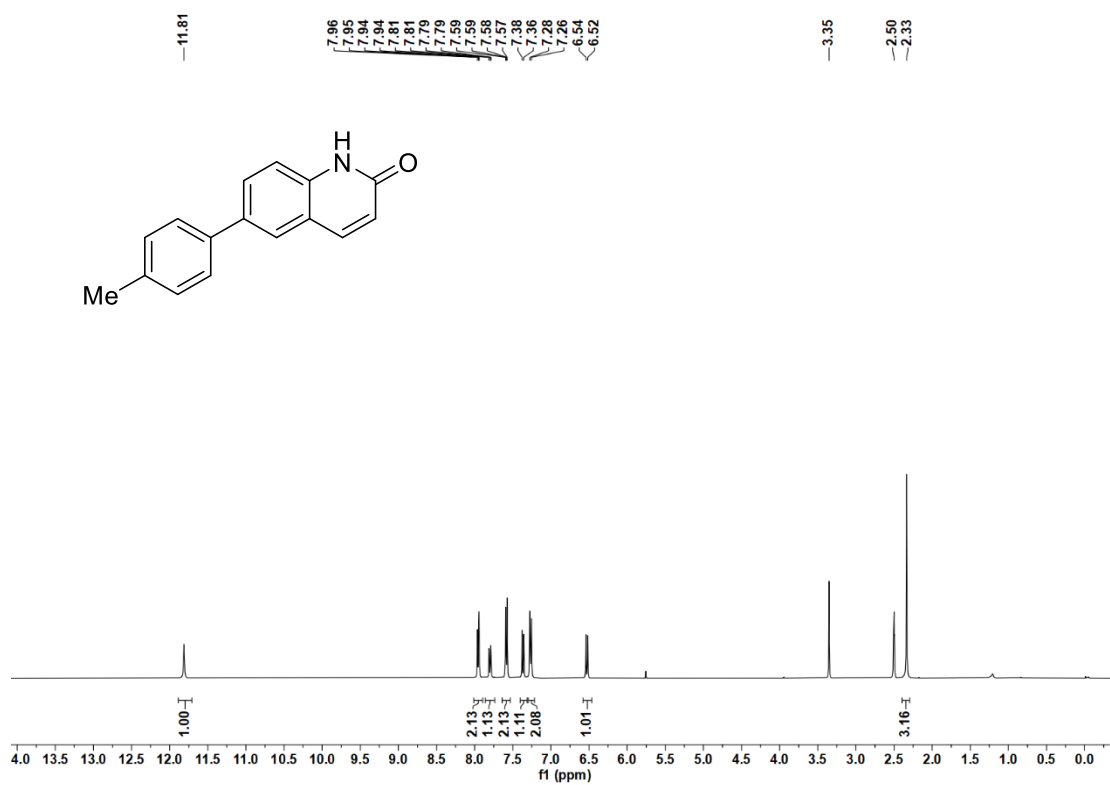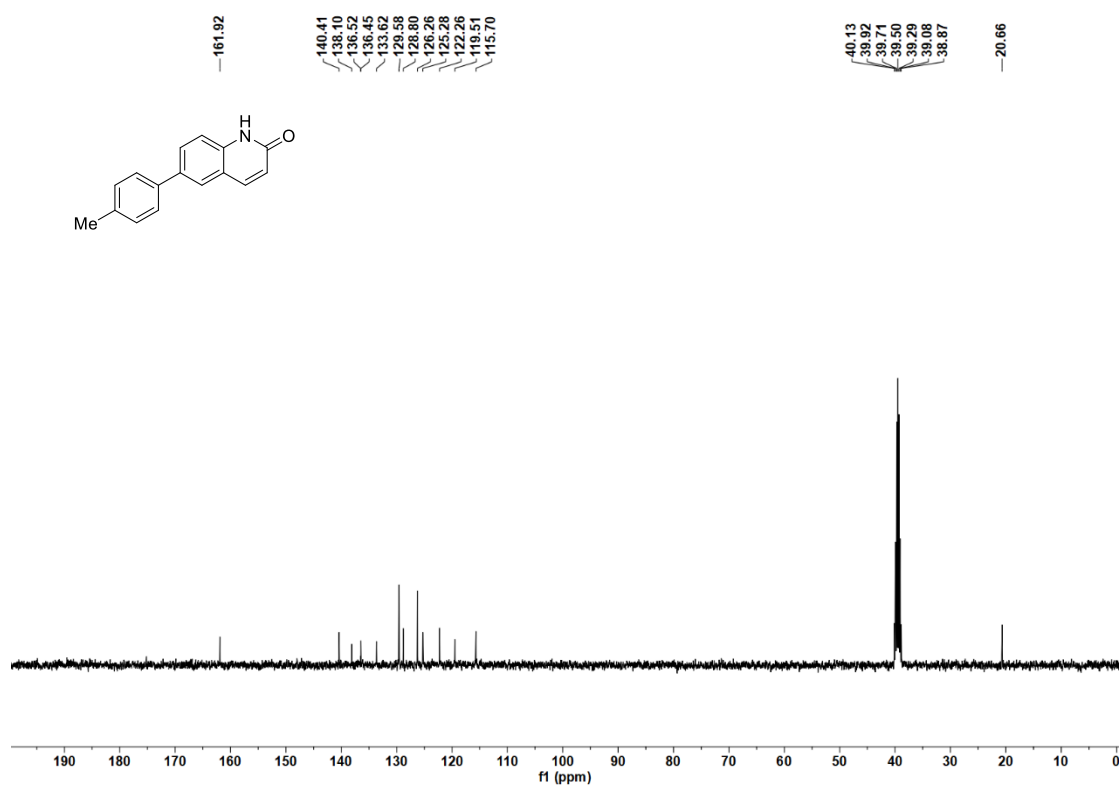

<sup>1</sup>H-NMR (400 MHz, DMSO-*d*<sub>6</sub>), <sup>13</sup>C NMR (101 MHz, DMSO-*d*<sub>6</sub>) of **52**

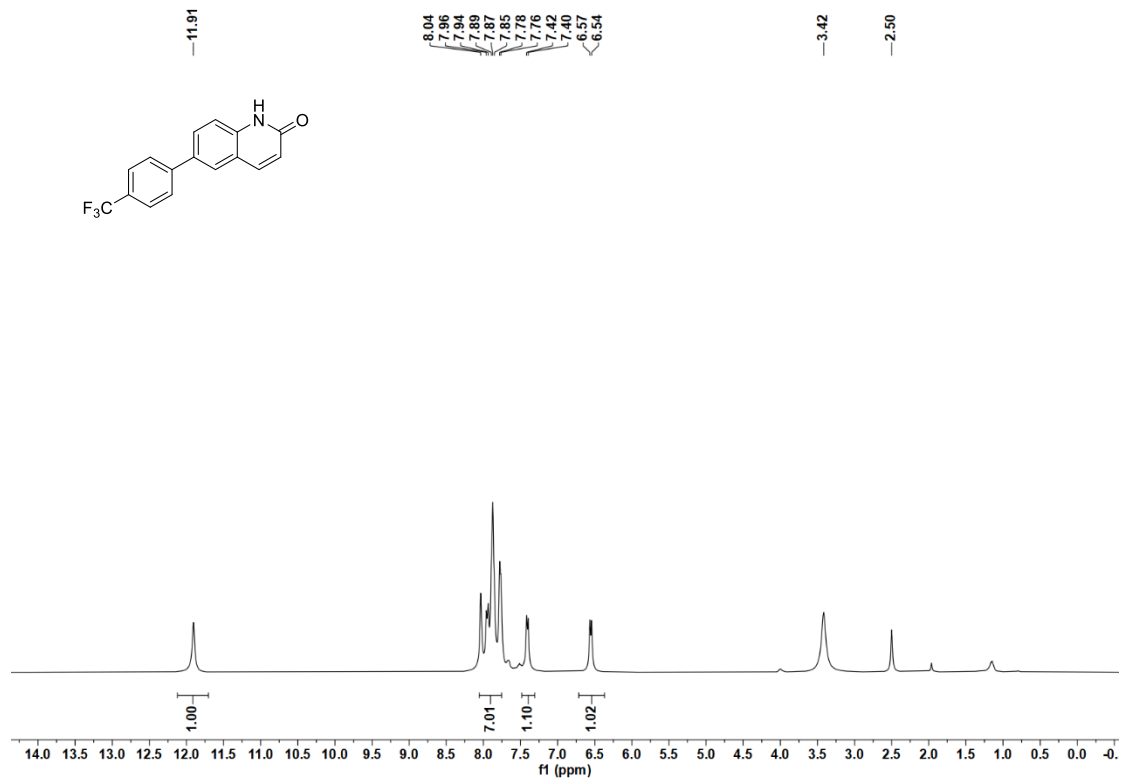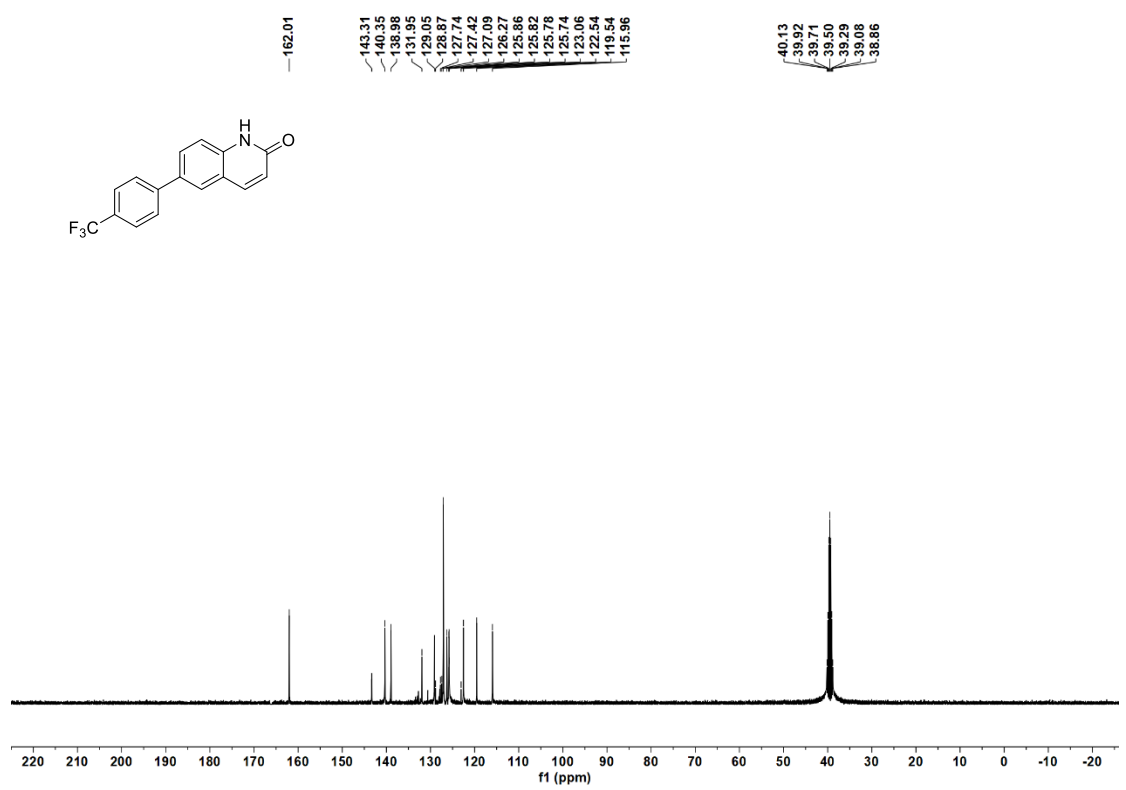



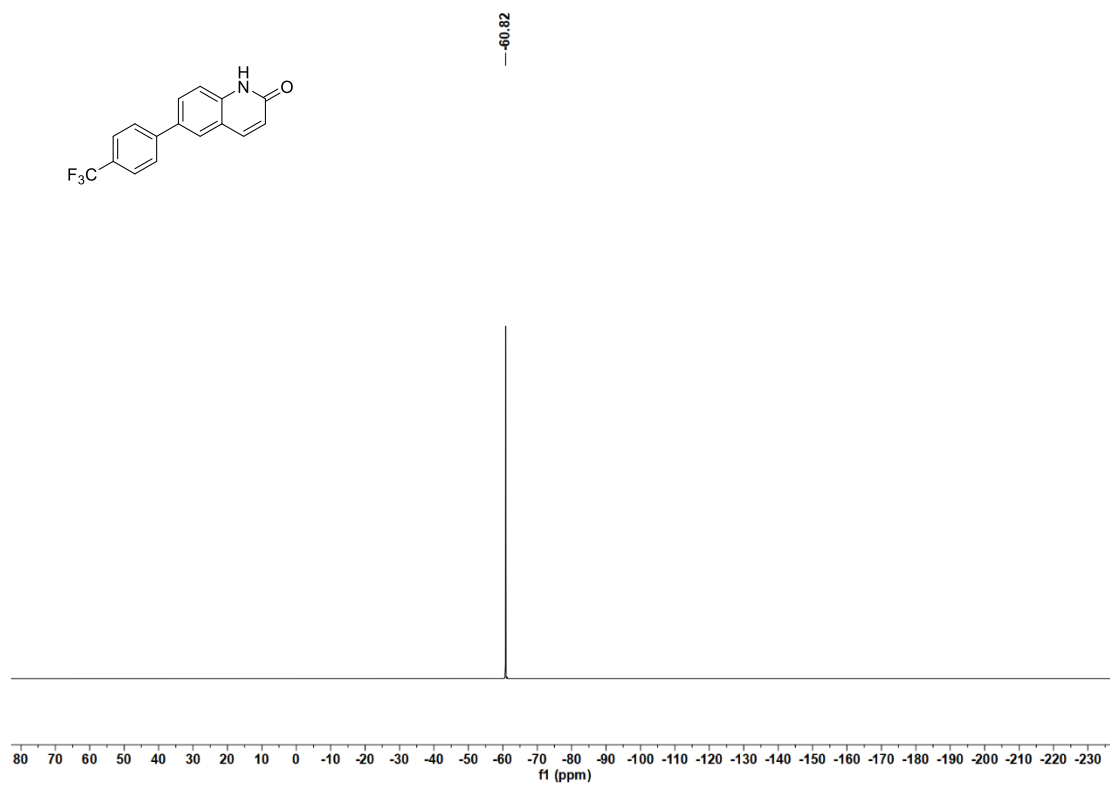

$^1\text{H}$ -NMR (400 MHz,  $\text{CDCl}_3$ ),  $^{13}\text{C}$  NMR (101 MHz,  $\text{CDCl}_3$ ),  $^{19}\text{F}$ -NMR (376 MHz,  $\text{CDCl}_3$ ) of **53**

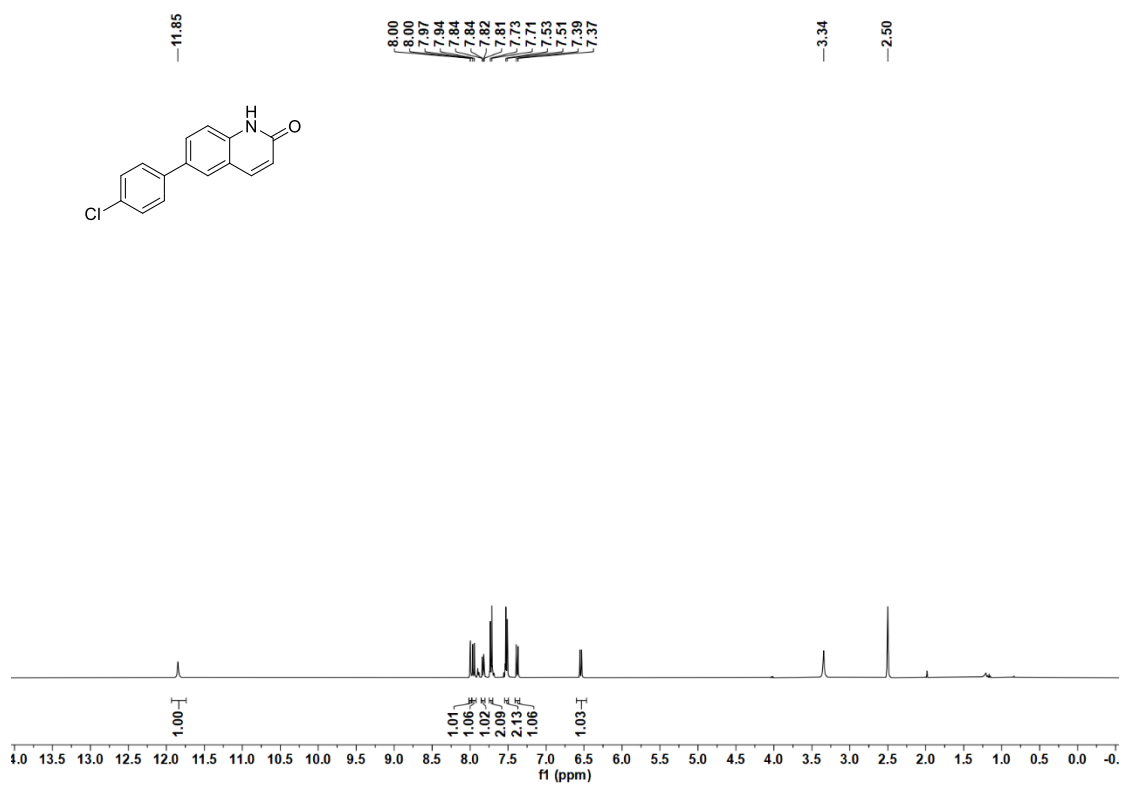

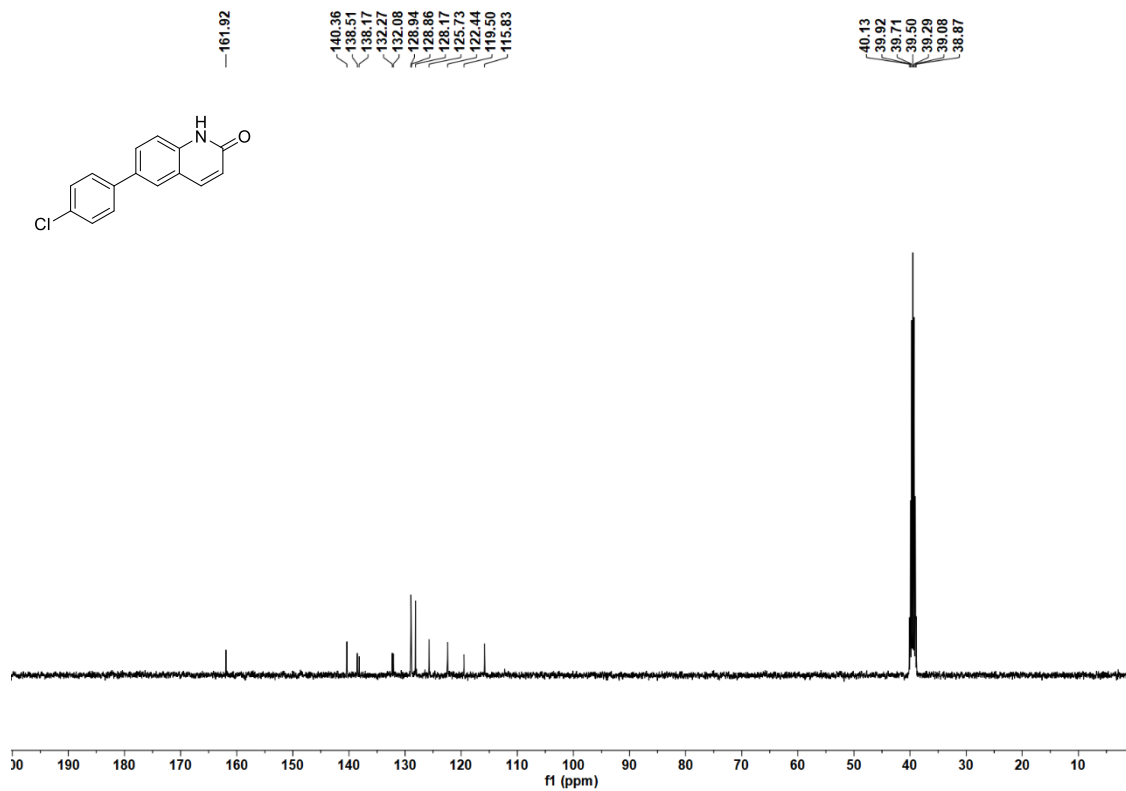

$^1\text{H}$ -NMR (400 MHz, DMSO- $d_6$ ),  $^{13}\text{C}$  NMR (101 MHz, DMSO- $d_6$ ) of **54**

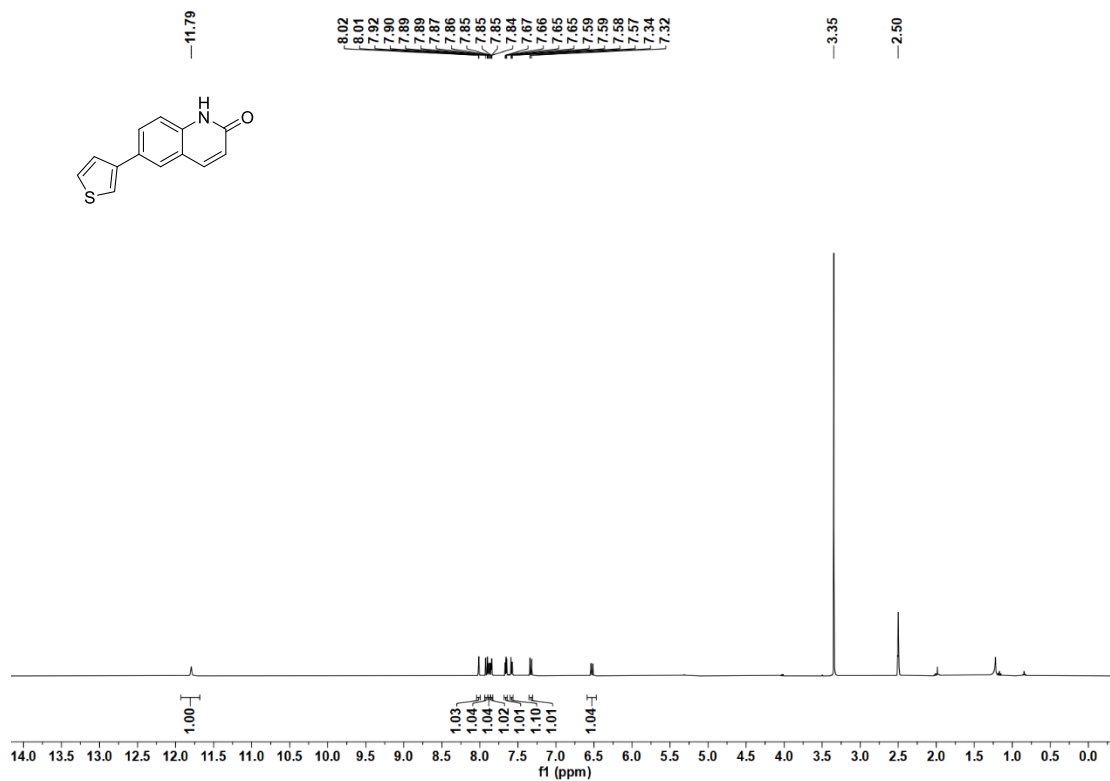

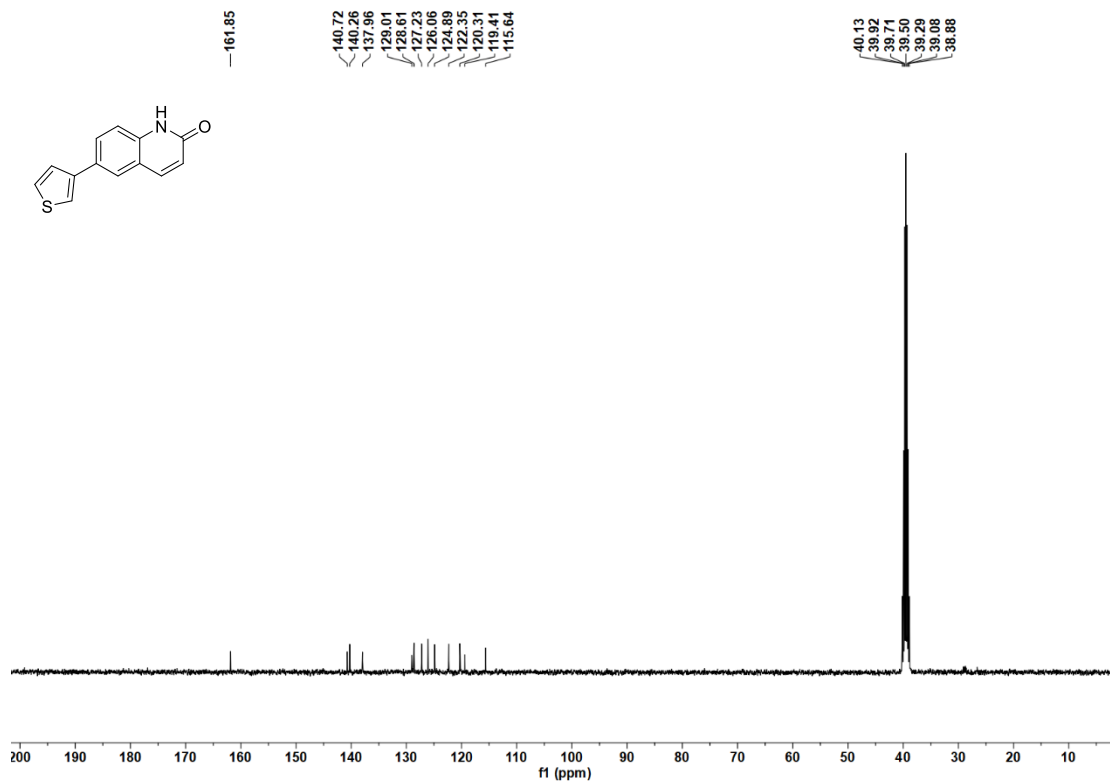

$^1\text{H-NMR}$  (400 MHz,  $\text{DMSO-}d_6$ ),  $^{13}\text{C NMR}$  (101 MHz,  $\text{DMSO-}d_6$ ) of **55**

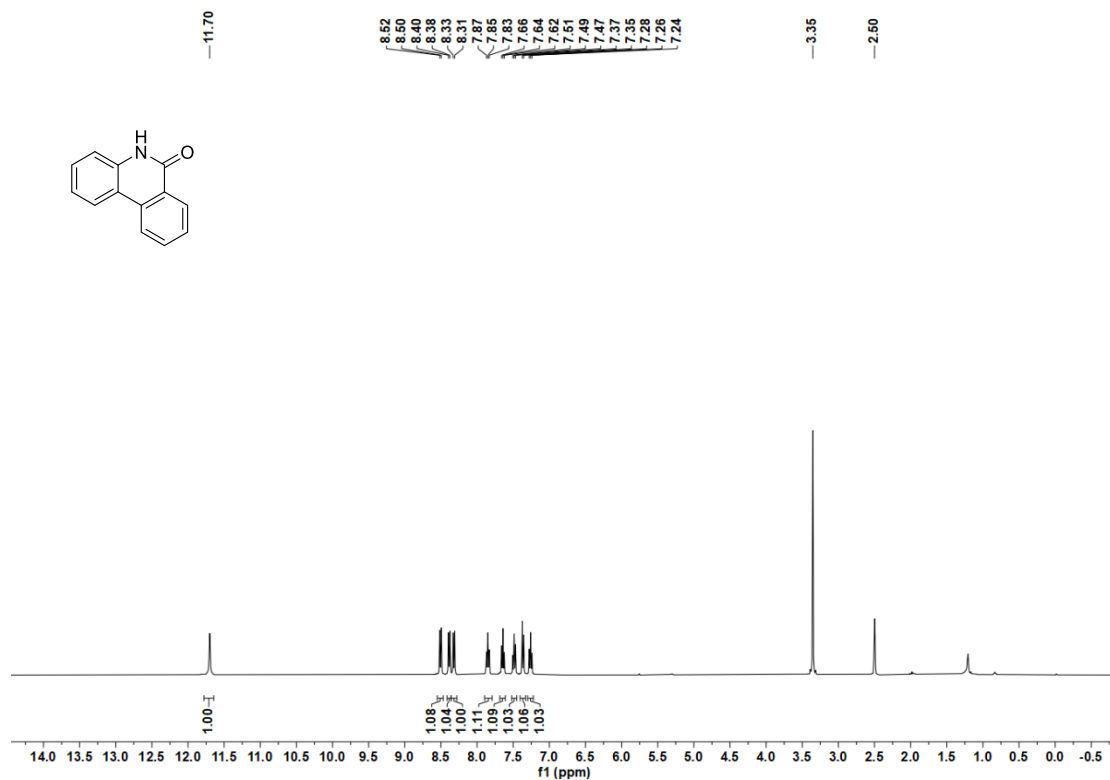

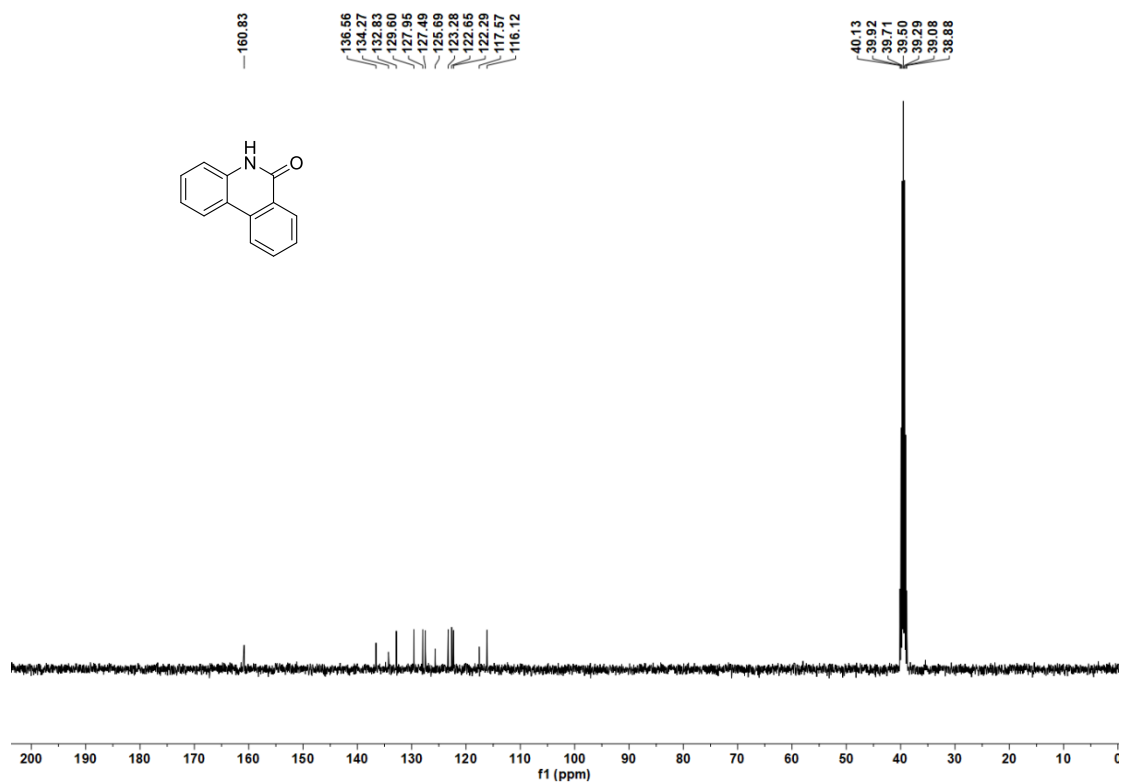

**<sup>1</sup>H-NMR (400 MHz, DMSO-*d*<sub>6</sub>), <sup>13</sup>C NMR (101 MHz, DMSO-*d*<sub>6</sub>) of 56**

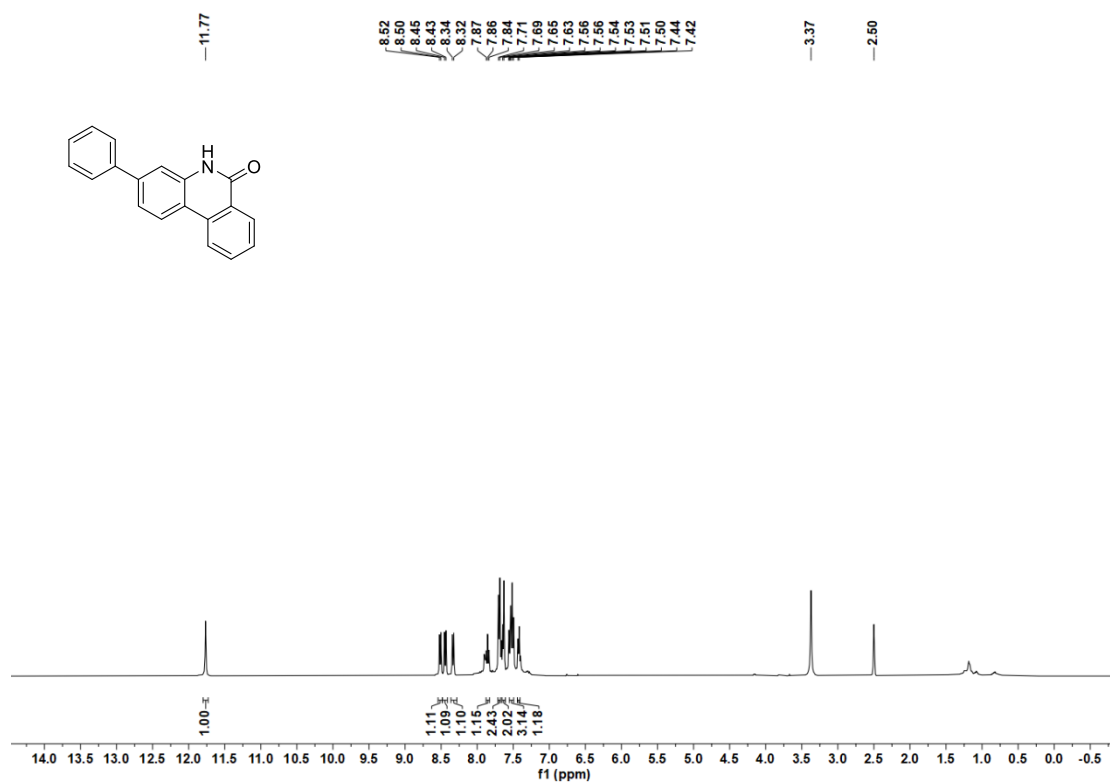

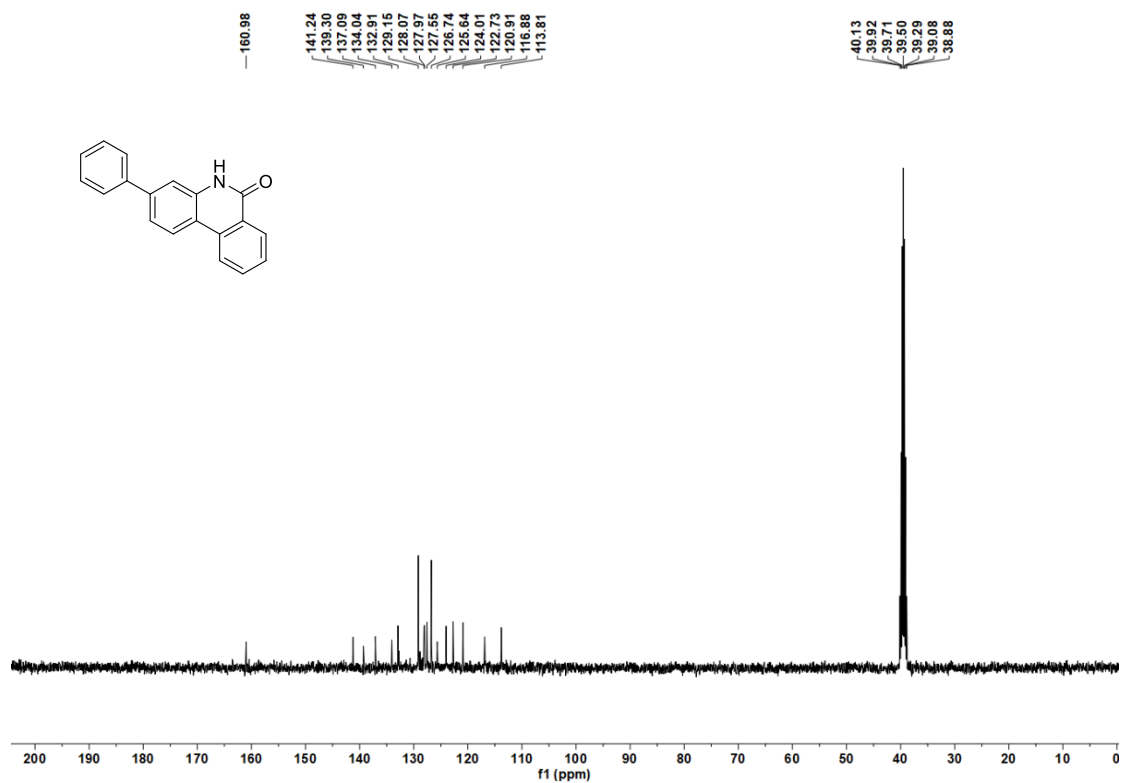

<sup>1</sup>H-NMR (400 MHz, DMSO-*d*<sub>6</sub>), <sup>13</sup>C NMR (101 MHz, DMSO-*d*<sub>6</sub>) of **57**

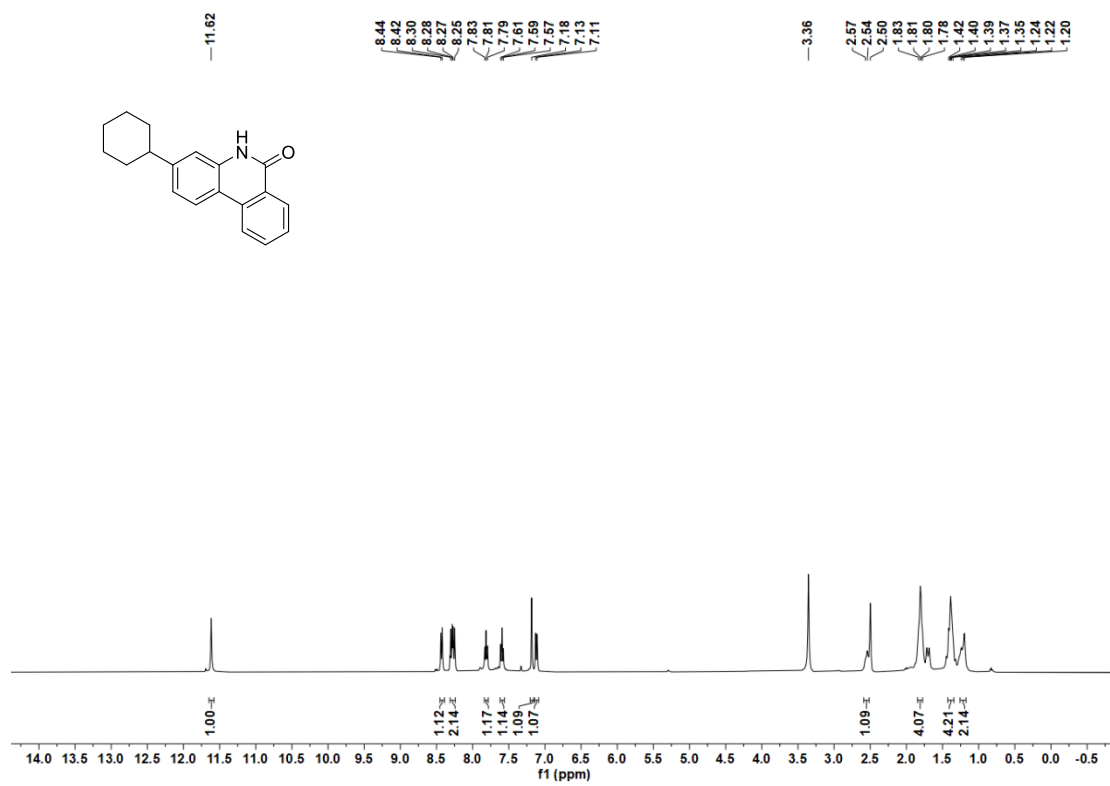

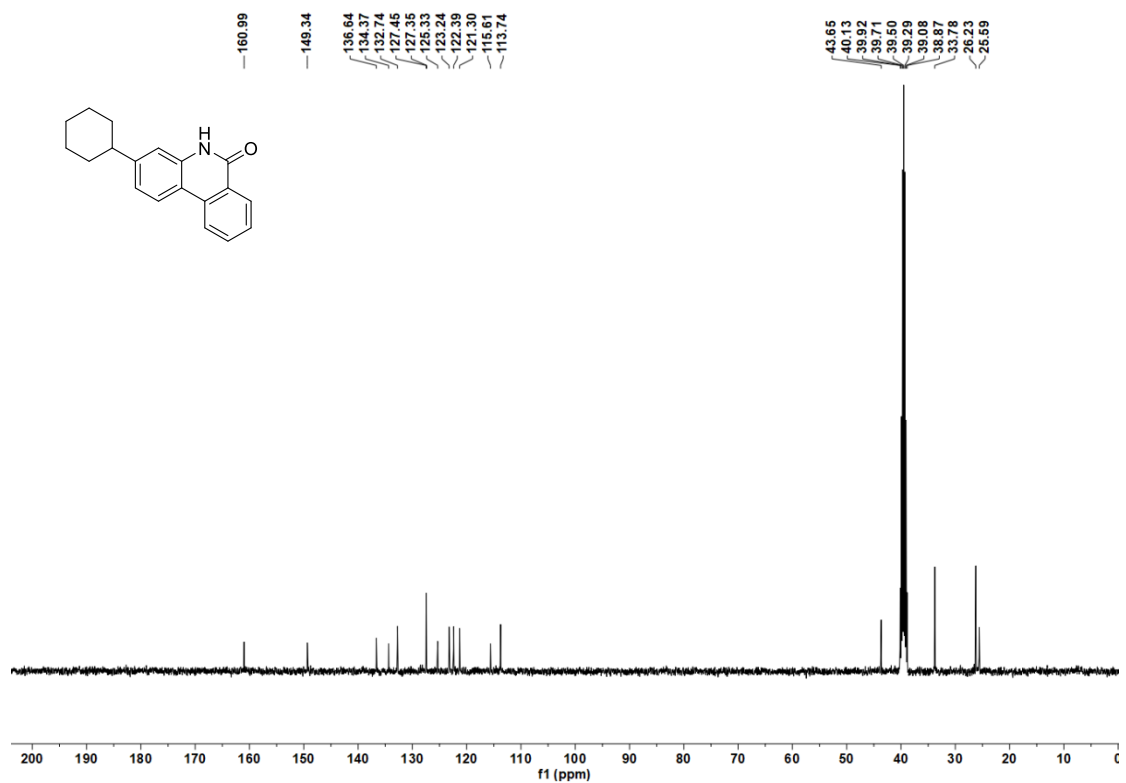

$^1\text{H-NMR}$  (400 MHz,  $\text{DMSO-}d_6$ ),  $^{13}\text{C}$  NMR (101 MHz,  $\text{DMSO-}d_6$ ) of **58**

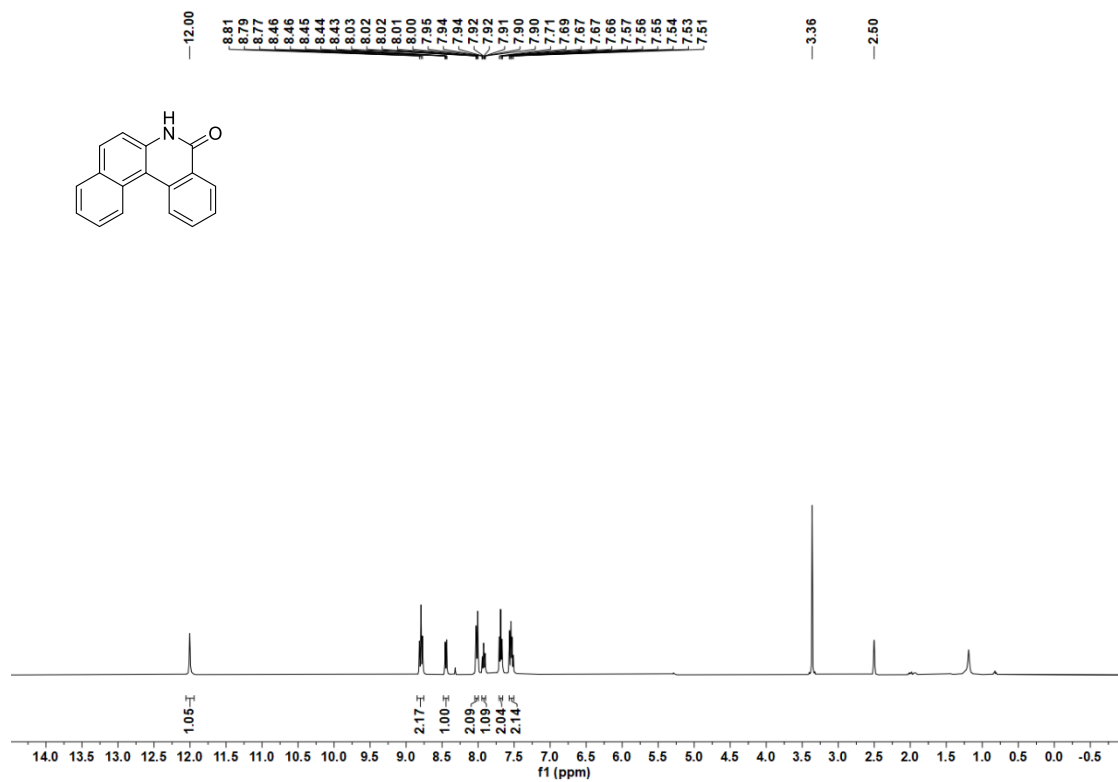

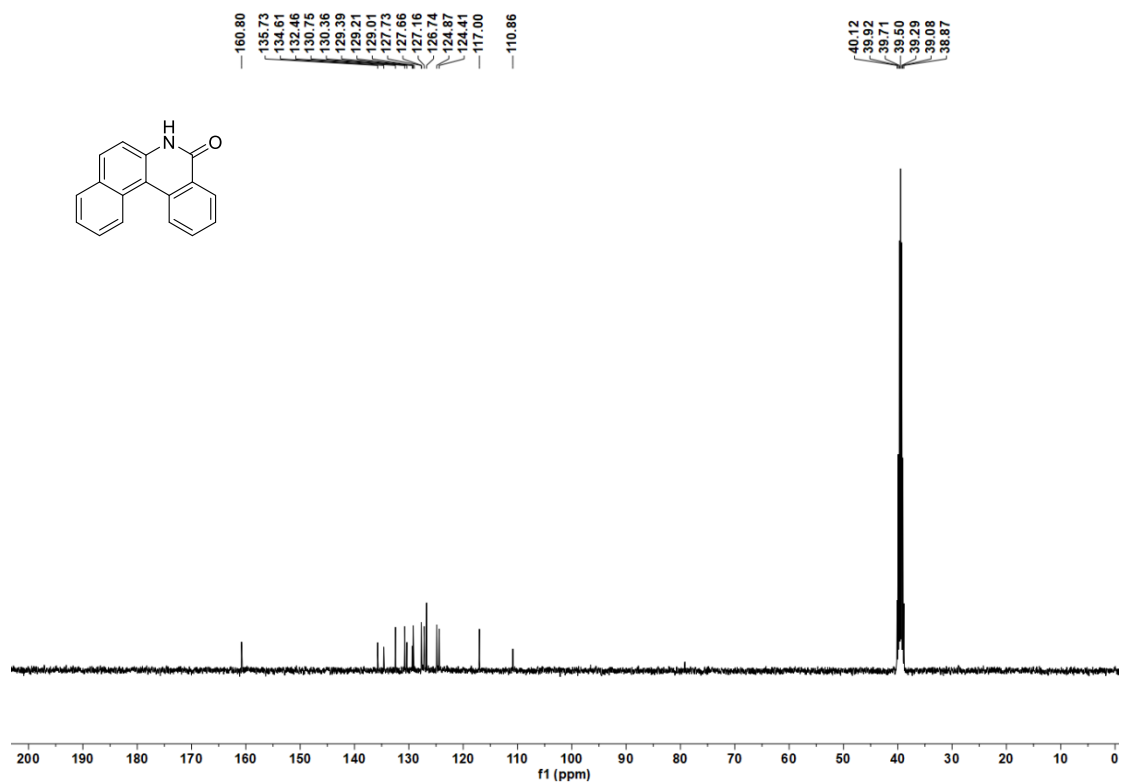

$^1\text{H-NMR}$  (400 MHz,  $\text{DMSO-}d_6$ ),  $^{13}\text{C}$  NMR (101 MHz,  $\text{DMSO-}d_6$ ) of **59**

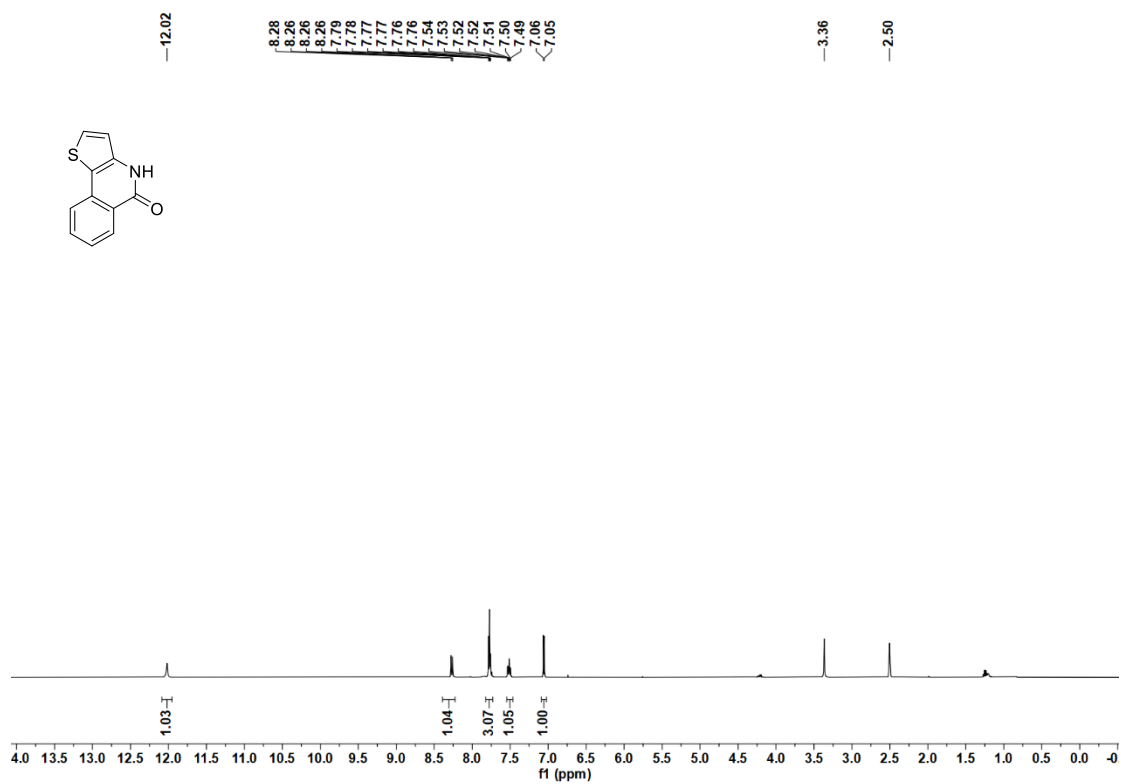

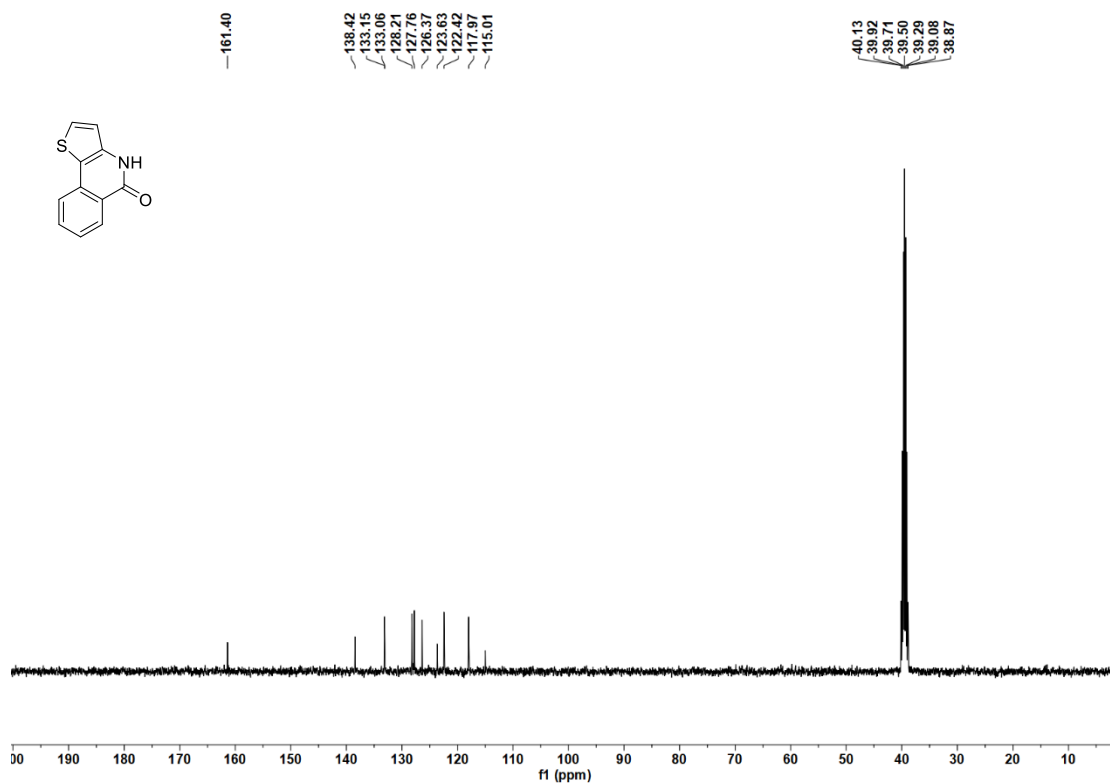

$^1\text{H}$ -NMR (400 MHz,  $\text{DMSO-}d_6$ ),  $^{13}\text{C}$  NMR (101 MHz,  $\text{DMSO-}d_6$ ) of **60**

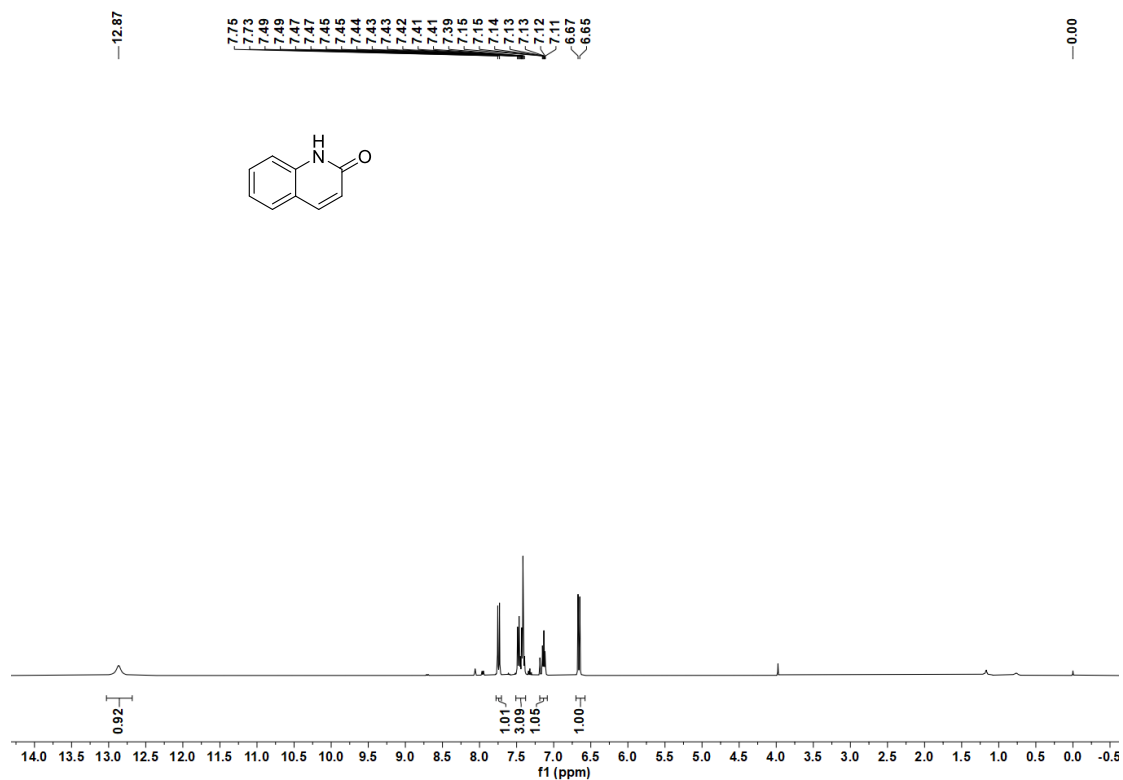



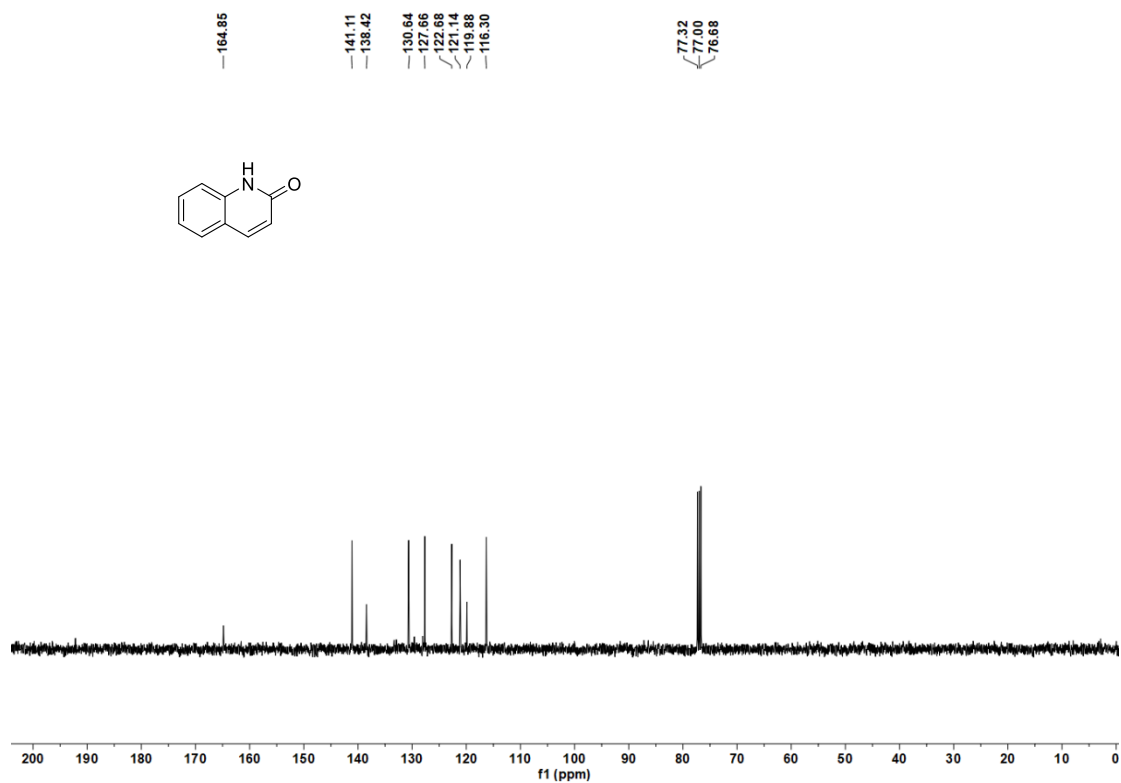

<sup>1</sup>H-NMR (400 MHz, CDCl<sub>3</sub>), <sup>13</sup>C NMR (101 MHz, CDCl<sub>3</sub>) of **61**
